# Supplementary material for: COBRAme: A computational framework for genome-scale models of metabolism and gene expression
Source: PLoS Comput Biol. 2018 Jul 5;14(7):e1006302. doi: 10.1371/journal.pcbi.1006302 (PMC6049947; doi:10.1371/journal.pcbi.1006302)
Supplement: S7 File — Summary of the attributes of each metabolite type used in the COBRAme ME-model. (XLSX) [file pcbi.1006302.s007.xlsx]

## Sheet: README
S7 File. The Metabolites in iJL1678b-ME.
Each sheet corresponds to the COBRAme metabolite type shown in the sheet name. The attributes of each metabolite is presented.
Most metabolites effectively behave the same as a typical COBRA metabolite. The main exception is the TranscribedGene metaboltie type which contains additional sequence information about the RNA it represents.
An additional metabolite_involvement column is present which lists the types of MEReactions that each metabolite participates in.
The compartments correspond to: "p"="Periplasm", "e"= "Extra-organism" , "c"="Cytosol", "im"= 'Inner Membrane ", "om"= "Outer Membrane", "mc"="ME-model Constraint", "m"="Membrane"
For the more about the metabolite types refer to the online documentation (https://cobrame.readthedocs.io)

## Sheet: GenericComponent
id	formula	charge	met_type	name	notes	annotation	compartment	reaction_involvement
generic_16Sm4Cm1402	None	None	GenericComponent		{}	{}	c	{'GenericFormationReaction', 'ComplexFormation'}
generic_LYSINEaaRS	None	None	GenericComponent		{}	{}	c	{'GenericFormationReaction', 'tRNAChargingReaction'}
generic_Dus	None	None	GenericComponent		{}	{}	c	{'GenericFormationReaction', 'tRNAChargingReaction'}
generic_RF	None	None	GenericComponent		{}	{}	c	{'GenericFormationReaction', 'TranslationReaction'}
generic_Tuf	None	None	GenericComponent		{}	{}	c	{'GenericFormationReaction', 'TranslationReaction'}
generic_RNase	None	None	GenericComponent		{}	{}	c	{'GenericFormationReaction', 'ComplexFormation'}
generic_16s_rRNAs	None	None	GenericComponent		{}	{}	c	{'GenericFormationReaction', 'ComplexFormation'}
generic_23s_rRNAs	None	None	GenericComponent		{}	{}	c	{'GenericFormationReaction', 'ComplexFormation'}
generic_5s_rRNAs	None	None	GenericComponent		{}	{}	c	{'GenericFormationReaction', 'ComplexFormation'}
generic_2fe2s_transfer_complex	None	None	GenericComponent		{}	{}	c	{'GenericFormationReaction', 'ComplexFormation'}
generic_4fe4s_transfer_complex	None	None	GenericComponent		{}	{}	c	{'GenericFormationReaction', 'ComplexFormation'}

## Sheet: ProcessedProtein
id	formula	charge	met_type	name	notes	annotation	compartment	reaction_involvement	unprocessed_protein_id
protein_b0007_Inner_Membrane	C2391H3689N602O619S28	None	ProcessedProtein		{}	{}	im	{'PostTranslationReaction', 'ComplexFormation'}	protein_b0007
protein_b0019_Inner_Membrane	C1937H3109N480O487S14	None	ProcessedProtein		{}	{}	im	{'PostTranslationReaction', 'ComplexFormation'}	protein_b0019
protein_b0027_Inner_Membrane	C853H1300N211O216S6	None	ProcessedProtein		{}	{}	im	{'PostTranslationReaction', 'ComplexFormation'}	protein_b0027
protein_b0040_Inner_Membrane	C2683H4070N622O664S29	None	ProcessedProtein		{}	{}	im	{'PostTranslationReaction', 'ComplexFormation'}	protein_b0040
protein_b0047_Inner_Membrane	C3071H4943N812O849S30	None	ProcessedProtein		{}	{}	im	{'PostTranslationReaction', 'ComplexFormation'}	protein_b0047
protein_b0053_Periplasm	C2054H3333N608O639S16	None	ProcessedProtein		{}	{}	p	{'PostTranslationReaction', 'ComplexFormation'}	protein_b0053
protein_b0067_Inner_Membrane	C2769H4399N708O694S26	None	ProcessedProtein		{}	{}	im	{'PostTranslationReaction', 'ComplexFormation'}	protein_b0067
protein_b0068_Inner_Membrane	C1651H2543N420O475S9	None	ProcessedProtein		{}	{}	im	{'PostTranslationReaction', 'ComplexFormation'}	protein_b0068
protein_b0070_Inner_Membrane	C1977H3108N488O501S31	None	ProcessedProtein		{}	{}	im	{'PostTranslationReaction', 'ComplexFormation'}	protein_b0070
protein_b0084_Inner_Membrane	C2840H4588N806O833S17	None	ProcessedProtein		{}	{}	im	{'PostTranslationReaction', 'ComplexFormation'}	protein_b0084
protein_b0087_Inner_Membrane	C1893H2937N459O455S15	None	ProcessedProtein		{}	{}	im	{'PostTranslationReaction', 'ComplexFormation'}	protein_b0087
protein_b0112_Inner_Membrane	C2330H3614N561O590S24	None	ProcessedProtein		{}	{}	im	{'PostTranslationReaction', 'ComplexFormation'}	protein_b0112
protein_b0123_Periplasm	C2517H3934N699O721S32	None	ProcessedProtein		{}	{}	p	{'PostTranslationReaction', 'ComplexFormation'}	protein_b0123
protein_b0124_Inner_Membrane	C3940H6028N1024O1125S31	None	ProcessedProtein		{}	{}	im	{'PostTranslationReaction', 'ComplexFormation'}	protein_b0124
protein_b0149_Inner_Membrane	C4179H6642N1185O1243S29	None	ProcessedProtein		{}	{}	im	{'PostTranslationReaction', 'ComplexFormation'}	protein_b0149
protein_b0150_Outer_Membrane	C3655H5555N987O1146S16	None	ProcessedProtein		{}	{}	om	{'PostTranslationReaction', 'ComplexFormation'}	protein_b0150
protein_b0152_Periplasm	C1497H2334N398O413S15	None	ProcessedProtein		{}	{}	p	{'PostTranslationReaction', 'ComplexFormation'}	protein_b0152
protein_b0153_Inner_Membrane	C3259H5277N838O814S38	None	ProcessedProtein		{}	{}	im	{'PostTranslationReaction', 'ComplexFormation'}	protein_b0153
protein_b0155_Inner_Membrane	C2316H3704N599O609S21	None	ProcessedProtein		{}	{}	im	{'PostTranslationReaction', 'ComplexFormation'}	protein_b0155
protein_b0158_Periplasm	C1330H2111N359O380S5	None	ProcessedProtein		{}	{}	p	{'PostTranslationReaction', 'ComplexFormation'}	protein_b0158
protein_b0175_Inner_Membrane	C1500H2319N360O355S12	None	ProcessedProtein		{}	{}	im	{'PostTranslationReaction', 'ComplexFormation'}	protein_b0175
protein_b0177_Outer_Membrane	C4039H6124N1074O1264S18	None	ProcessedProtein		{}	{}	om	{'PostTranslationReaction', 'ComplexFormation'}	protein_b0177
protein_b0197_Inner_Membrane	C1329H2117N344O403S2	None	ProcessedProtein		{}	{}	im	{'PostTranslationReaction'}	protein_b0197
protein_b0198_Inner_Membrane	C1085H1760N268O274S10	None	ProcessedProtein		{}	{}	im	{'PostTranslationReaction', 'ComplexFormation'}	protein_b0198
protein_b0221_Inner_Membrane	C4018H6399N1097O1137S30	None	ProcessedProtein		{}	{}	im	{'PostTranslationReaction', 'ComplexFormation'}	protein_b0221
protein_b0241_Outer_Membrane	C1723H2606N461O553S9	None	ProcessedProtein		{}	{}	om	{'PostTranslationReaction', 'ComplexFormation'}	protein_b0241
protein_b0260_Inner_Membrane	C2373H3645N576O599S22	None	ProcessedProtein		{}	{}	im	{'PostTranslationReaction', 'ComplexFormation'}	protein_b0260
protein_b0314_Inner_Membrane	C3514H5360N872O945S28	None	ProcessedProtein		{}	{}	im	{'PostTranslationReaction', 'ComplexFormation'}	protein_b0314
protein_b0336_Inner_Membrane	C2026H3187N500O535S17	None	ProcessedProtein		{}	{}	im	{'PostTranslationReaction', 'ComplexFormation'}	protein_b0336
protein_b0341_Inner_Membrane	C1932H3059N491O471S21	None	ProcessedProtein		{}	{}	im	{'PostTranslationReaction', 'ComplexFormation'}	protein_b0341
protein_b0343_Inner_Membrane	C2223H3336N506O541S22	None	ProcessedProtein		{}	{}	im	{'PostTranslationReaction', 'ComplexFormation'}	protein_b0343
protein_b0353_Inner_Membrane	C1911H3073N479O500S25	None	ProcessedProtein		{}	{}	im	{'PostTranslationReaction', 'ComplexFormation'}	protein_b0353
protein_b0365_Periplasm	C1551H2458N413O459S	None	ProcessedProtein		{}	{}	p	{'PostTranslationReaction', 'ComplexFormation'}	protein_b0365
protein_b0367_Inner_Membrane	C1400H2269N354O346S7	None	ProcessedProtein		{}	{}	im	{'PostTranslationReaction', 'ComplexFormation'}	protein_b0367
protein_b0383_Periplasm	C2154H3450N609O696S13	None	ProcessedProtein		{}	{}	p	{'PostTranslationReaction', 'ComplexFormation'}	protein_b0383
protein_b0401_Inner_Membrane	C2158H3394N526O564S15	None	ProcessedProtein		{}	{}	im	{'PostTranslationReaction', 'ComplexFormation'}	protein_b0401
protein_b0408_Inner_Membrane	C2959H4873N823O884S16	None	ProcessedProtein		{}	{}	im	{'PostTranslationReaction', 'ComplexFormation'}	protein_b0408
protein_b0409_Inner_Membrane	C1602H2558N415O454S15	None	ProcessedProtein		{}	{}	im	{'PostTranslationReaction', 'ComplexFormation'}	protein_b0409
protein_b0411_Outer_Membrane	C1537H2179N396O449S6	None	ProcessedProtein		{}	{}	om	{'PostTranslationReaction', 'ComplexFormation'}	protein_b0411
protein_b0418_Inner_Membrane	C914H1374N225O218S13	None	ProcessedProtein		{}	{}	im	{'PostTranslationReaction', 'ComplexFormation'}	protein_b0418
protein_b0428_Inner_Membrane	C1519H2365N362O380S15	None	ProcessedProtein		{}	{}	im	{'PostTranslationReaction', 'ComplexFormation'}	protein_b0428
protein_b0429_Inner_Membrane	C553H861N133O142S12	None	ProcessedProtein		{}	{}	im	{'PostTranslationReaction', 'ComplexFormation'}	protein_b0429
protein_b0430_Inner_Membrane	C1055H1587N258O268S14	None	ProcessedProtein		{}	{}	im	{'PostTranslationReaction', 'ComplexFormation'}	protein_b0430
protein_b0431_Inner_Membrane	C3526H5266N834O865S37	None	ProcessedProtein		{}	{}	im	{'PostTranslationReaction', 'ComplexFormation'}	protein_b0431
protein_b0432_Inner_Membrane	C1589H2437N405O447S17	None	ProcessedProtein		{}	{}	im	{'PostTranslationReaction', 'ComplexFormation'}	protein_b0432
protein_b0433_Inner_Membrane	C2498H3890N604O639S20	None	ProcessedProtein		{}	{}	im	{'PostTranslationReaction', 'ComplexFormation'}	protein_b0433
protein_b0451_Inner_Membrane	C2059H3226N512O541S22	None	ProcessedProtein		{}	{}	im	{'PostTranslationReaction', 'ComplexFormation'}	protein_b0451
protein_b0462_Inner_Membrane	C5131H8119N1324O1487S44	None	ProcessedProtein		{}	{}	im	{'PostTranslationReaction', 'ComplexFormation'}	protein_b0462
protein_b0463_Inner_Membrane	C1842H3021N527O593S5	None	ProcessedProtein		{}	{}	im	{'PostTranslationReaction'}	protein_b0463
protein_b0480_Periplasm	C2709H4230N733O823S18	None	ProcessedProtein		{}	{}	p	{'PostTranslationReaction', 'ComplexFormation'}	protein_b0480
protein_b0484_Inner_Membrane	C3867H6285N1077O1179S31	None	ProcessedProtein		{}	{}	im	{'PostTranslationReaction', 'ComplexFormation'}	protein_b0484
protein_b0494_Periplasm	C1074H1658N291O297S7	None	ProcessedProtein		{}	{}	p	{'PostTranslationReaction', 'ComplexFormation'}	protein_b0494
protein_b0511_Inner_Membrane	C2468H3806N590O630S20	None	ProcessedProtein		{}	{}	im	{'PostTranslationReaction', 'ComplexFormation'}	protein_b0511
protein_b0572_Outer_Membrane	C2209H3510N631O690S10	None	ProcessedProtein		{}	{}	om	{'PostTranslationReaction'}	protein_b0572
protein_b0573_Periplasm	C545H872N147O161S6	None	ProcessedProtein		{}	{}	p	{'PostTranslationReaction', 'ComplexFormation'}	protein_b0573
protein_b0574_Periplasm	C1980H3177N534O593S11	None	ProcessedProtein		{}	{}	p	{'PostTranslationReaction', 'ComplexFormation'}	protein_b0574
protein_b0575_Inner_Membrane	C5219H8339N1361O1460S37	None	ProcessedProtein		{}	{}	im	{'PostTranslationReaction', 'ComplexFormation'}	protein_b0575
protein_b0576_Inner_Membrane	C2380H3686N585O591S23	None	ProcessedProtein		{}	{}	im	{'PostTranslationReaction', 'ComplexFormation'}	protein_b0576
protein_b0584_Outer_Membrane	C3607H5559N1020O1152S14	None	ProcessedProtein		{}	{}	om	{'PostTranslationReaction', 'ComplexFormation'}	protein_b0584
protein_b0589_Inner_Membrane	C1592H2639N416O415S21	None	ProcessedProtein		{}	{}	im	{'PostTranslationReaction', 'ComplexFormation'}	protein_b0589
protein_b0590_Inner_Membrane	C1541H2569N411O421S9	None	ProcessedProtein		{}	{}	im	{'PostTranslationReaction', 'ComplexFormation'}	protein_b0590
protein_b0591_Inner_Membrane	C2001H3244N504O518S20	None	ProcessedProtein		{}	{}	im	{'PostTranslationReaction', 'ComplexFormation'}	protein_b0591
protein_b0592_Periplasm	C1530H2449N420O464S4	None	ProcessedProtein		{}	{}	p	{'PostTranslationReaction', 'ComplexFormation'}	protein_b0592
protein_b0604_Periplasm	C1245H1976N317O358S12	None	ProcessedProtein		{}	{}	p	{'PostTranslationReaction', 'ComplexFormation'}	protein_b0604
protein_b0612_Inner_Membrane	C2511H3897N585O626S25	None	ProcessedProtein		{}	{}	im	{'PostTranslationReaction', 'ComplexFormation'}	protein_b0612
protein_b0621_Inner_Membrane	C2236H3613N532O596S29	None	ProcessedProtein		{}	{}	im	{'PostTranslationReaction', 'ComplexFormation'}	protein_b0621
protein_b0622_Outer_Membrane	C1022H1446N255O269S5	None	ProcessedProtein		{}	{}	om	{'PostTranslationReaction', 'ComplexFormation'}	protein_b0622
protein_b0627_Inner_Membrane	C313H535N84O93S2	None	ProcessedProtein		{}	{}	im	{'PostTranslationReaction', 'ComplexFormation'}	protein_b0627
protein_b0632_Inner_Membrane	C1986H3130N539O584S17	None	ProcessedProtein		{}	{}	im	{'PostTranslationReaction', 'ComplexFormation'}	protein_b0632
protein_b0635_Inner_Membrane	C3182H4970N882O927S14	None	ProcessedProtein		{}	{}	im	{'PostTranslationReaction', 'ComplexFormation'}	protein_b0635
protein_b0653_Inner_Membrane	C1171H1840N277O300S10	None	ProcessedProtein		{}	{}	im	{'PostTranslationReaction', 'ComplexFormation'}	protein_b0653
protein_b0654_Inner_Membrane	C1285H1996N314O326S14	None	ProcessedProtein		{}	{}	im	{'PostTranslationReaction', 'ComplexFormation'}	protein_b0654
protein_b0655_Periplasm	C1476H2374N406O454S11	None	ProcessedProtein		{}	{}	p	{'PostTranslationReaction', 'ComplexFormation'}	protein_b0655
protein_b0657_Inner_Membrane	C2652H4116N673O696S16	None	ProcessedProtein		{}	{}	im	{'PostTranslationReaction', 'ComplexFormation'}	protein_b0657
protein_b0679_Inner_Membrane	C3133H4923N793O865S25	None	ProcessedProtein		{}	{}	im	{'PostTranslationReaction', 'ComplexFormation'}	protein_b0679
protein_b0692_Inner_Membrane	C2141H3353N516O582S27	None	ProcessedProtein		{}	{}	im	{'PostTranslationReaction', 'ComplexFormation'}	protein_b0692
protein_b0697_Inner_Membrane	C3227H5275N877O940S25	None	ProcessedProtein		{}	{}	im	{'PostTranslationReaction', 'ComplexFormation'}	protein_b0697
protein_b0698_Inner_Membrane	C2715H4282N679O727S35	None	ProcessedProtein		{}	{}	im	{'PostTranslationReaction', 'ComplexFormation'}	protein_b0698
protein_b4513_Inner_Membrane	C149H236N30O37S	None	ProcessedProtein		{}	{}	im	{'PostTranslationReaction', 'ComplexFormation'}	protein_b4513
protein_b0709_Inner_Membrane	C2519H3897N619O653S27	None	ProcessedProtein		{}	{}	im	{'PostTranslationReaction', 'ComplexFormation'}	protein_b0709
protein_b0721_Inner_Membrane	C668H1067N166O168S6	None	ProcessedProtein		{}	{}	im	{'PostTranslationReaction', 'ComplexFormation'}	protein_b0721
protein_b0722_Inner_Membrane	C625H958N138O146S4	None	ProcessedProtein		{}	{}	im	{'PostTranslationReaction', 'ComplexFormation'}	protein_b0722
protein_b0731_Inner_Membrane	C3151H4993N827O898S26	None	ProcessedProtein		{}	{}	im	{'PostTranslationReaction', 'ComplexFormation'}	protein_b0731
protein_b0733_Inner_Membrane	C2702H4138N661O720S25	None	ProcessedProtein		{}	{}	im	{'PostTranslationReaction', 'ComplexFormation'}	protein_b0733
protein_b0734_Inner_Membrane	C1986H3026N483O505S22	None	ProcessedProtein		{}	{}	im	{'PostTranslationReaction', 'ComplexFormation'}	protein_b0734
protein_b0751_Inner_Membrane	C1275H1961N300O316S14	None	ProcessedProtein		{}	{}	im	{'PostTranslationReaction', 'ComplexFormation'}	protein_b0751
protein_b0752_Inner_Membrane	C1571H2463N438O421S14	None	ProcessedProtein		{}	{}	im	{'PostTranslationReaction', 'ComplexFormation'}	protein_b0752
protein_b0756_Periplasm	C1693H2573N466O529S8	None	ProcessedProtein		{}	{}	p	{'PostTranslationReaction', 'ComplexFormation'}	protein_b0756
protein_b0763_Periplasm	C1235H1953N327O368S3	None	ProcessedProtein		{}	{}	p	{'PostTranslationReaction', 'ComplexFormation'}	protein_b0763
protein_b0764_Inner_Membrane	C1165H1863N295O293S8	None	ProcessedProtein		{}	{}	im	{'PostTranslationReaction', 'ComplexFormation'}	protein_b0764
protein_b0789_Periplasm	C2142H3340N619O595S11	None	ProcessedProtein		{}	{}	p	{'PostTranslationReaction', 'ComplexFormation'}	protein_b0789
protein_b0805_Outer_Membrane	C3574H5500N1018O1173S14	None	ProcessedProtein		{}	{}	om	{'PostTranslationReaction', 'ComplexFormation'}	protein_b0805
protein_b0810_Inner_Membrane	C1148H1832N289O279S7	None	ProcessedProtein		{}	{}	im	{'PostTranslationReaction', 'ComplexFormation'}	protein_b0810
protein_b0811_Periplasm	C1230H1948N317O368S4	None	ProcessedProtein		{}	{}	p	{'PostTranslationReaction', 'ComplexFormation'}	protein_b0811
protein_b0813_Inner_Membrane	C1460H2347N357O370S11	None	ProcessedProtein		{}	{}	im	{'PostTranslationReaction', 'ComplexFormation'}	protein_b0813
protein_b0831_Inner_Membrane	C1587H2483N398O405S14	None	ProcessedProtein		{}	{}	im	{'PostTranslationReaction', 'ComplexFormation'}	protein_b0831
protein_b0832_Inner_Membrane	C1547H2423N403O391S10	None	ProcessedProtein		{}	{}	im	{'PostTranslationReaction', 'ComplexFormation'}	protein_b0832
protein_b0837_Periplasm	C1848H2842N510O537S8	None	ProcessedProtein		{}	{}	p	{'PostTranslationReaction', 'ComplexFormation'}	protein_b0837
protein_b0839_Inner_Membrane	C1962H3075N521O577S13	None	ProcessedProtein		{}	{}	im	{'PostTranslationReaction', 'ComplexFormation'}	protein_b0839
protein_b0841_Inner_Membrane	C1058H1615N264O253S10	None	ProcessedProtein		{}	{}	im	{'PostTranslationReaction', 'ComplexFormation'}	protein_b0841
protein_b0842_Inner_Membrane	C2056H3266N512O529S22	None	ProcessedProtein		{}	{}	im	{'PostTranslationReaction', 'ComplexFormation'}	protein_b0842
protein_b0854_Periplasm	C1854H2876N479O542S9	None	ProcessedProtein		{}	{}	p	{'PostTranslationReaction', 'ComplexFormation'}	protein_b0854
protein_b0856_Inner_Membrane	C1689H2627N395O415S12	None	ProcessedProtein		{}	{}	im	{'PostTranslationReaction', 'ComplexFormation'}	protein_b0856
protein_b0857_Inner_Membrane	C1414H2259N358O360S16	None	ProcessedProtein		{}	{}	im	{'PostTranslationReaction', 'ComplexFormation'}	protein_b0857
protein_b0860_Periplasm	C1210H1882N313O364S6	None	ProcessedProtein		{}	{}	p	{'PostTranslationReaction', 'ComplexFormation'}	protein_b0860
protein_b0861_Inner_Membrane	C1172H1849N272O303S10	None	ProcessedProtein		{}	{}	im	{'PostTranslationReaction', 'ComplexFormation'}	protein_b0861
protein_b0862_Inner_Membrane	C1224H1931N302O316S9	None	ProcessedProtein		{}	{}	im	{'PostTranslationReaction', 'ComplexFormation'}	protein_b0862
protein_b0863_Periplasm	C1207H1892N315O370S6	None	ProcessedProtein		{}	{}	p	{'PostTranslationReaction', 'ComplexFormation'}	protein_b0863
protein_b0875_Inner_Membrane	C1116H1710N273O287S5	None	ProcessedProtein		{}	{}	im	{'PostTranslationReaction', 'ComplexFormation'}	protein_b0875
protein_b0886_Inner_Membrane	C2837H4577N781O801S15	None	ProcessedProtein		{}	{}	im	{'PostTranslationReaction', 'ComplexFormation'}	protein_b0886
protein_b0887_Inner_Membrane	C2947H4649N807O824S15	None	ProcessedProtein		{}	{}	im	{'PostTranslationReaction', 'ComplexFormation'}	protein_b0887
protein_b0891_Periplasm	C996H1536N276O312S4	None	ProcessedProtein		{}	{}	p	{'PostTranslationReaction', 'ComplexFormation'}	protein_b0891
protein_b0894_Periplasm	C3981H6248N1120O1207S40	None	ProcessedProtein		{}	{}	p	{'PostTranslationReaction', 'ComplexFormation'}	protein_b0894
protein_b0896_Inner_Membrane	C1442H2268N349O354S21	None	ProcessedProtein		{}	{}	im	{'PostTranslationReaction', 'ComplexFormation'}	protein_b0896
protein_b0904_Inner_Membrane	C1439H2217N346O374S20	None	ProcessedProtein		{}	{}	im	{'PostTranslationReaction', 'ComplexFormation'}	protein_b0904
protein_b0914_Inner_Membrane	C2860H4638N788O844S28	None	ProcessedProtein		{}	{}	im	{'PostTranslationReaction', 'ComplexFormation'}	protein_b0914
protein_b0915_Inner_Membrane	C1596H2565N450O449S11	None	ProcessedProtein		{}	{}	im	{'PostTranslationReaction', 'ComplexFormation'}	protein_b0915
protein_b0929_Outer_Membrane	C1755H2625N466O557S5	None	ProcessedProtein		{}	{}	om	{'PostTranslationReaction', 'ComplexFormation'}	protein_b0929
protein_b0934_Inner_Membrane	C1363H2150N341O339S6	None	ProcessedProtein		{}	{}	im	{'PostTranslationReaction', 'ComplexFormation'}	protein_b0934
protein_b0936_Periplasm	C1562H2495N422O453S4	None	ProcessedProtein		{}	{}	p	{'PostTranslationReaction', 'ComplexFormation'}	protein_b0936
protein_b0957_Outer_Membrane	C1652H2563N455O509S8	None	ProcessedProtein		{}	{}	om	{'PostTranslationReaction', 'ComplexFormation'}	protein_b0957
protein_b0972_Inner_Membrane	C1789H2785N505O532S25	None	ProcessedProtein		{}	{}	im	{'PostTranslationReaction', 'ComplexFormation'}	protein_b0972
protein_b0973_Periplasm	C2955H4549N818O863S28	None	ProcessedProtein		{}	{}	p	{'PostTranslationReaction', 'ComplexFormation'}	protein_b0973
protein_b0974_Inner_Membrane	C1301H1914N321O317S15	None	ProcessedProtein		{}	{}	im	{'PostTranslationReaction', 'ComplexFormation'}	protein_b0974
protein_b0978_Inner_Membrane	C2693H4096N672O698S27	None	ProcessedProtein		{}	{}	im	{'PostTranslationReaction', 'ComplexFormation'}	protein_b0978
protein_b0979_Inner_Membrane	C2020H3088N475O483S21	None	ProcessedProtein		{}	{}	im	{'PostTranslationReaction', 'ComplexFormation'}	protein_b0979
protein_b0980_Periplasm	C2088H3335N583O625S14	None	ProcessedProtein		{}	{}	p	{'PostTranslationReaction', 'ComplexFormation'}	protein_b0980
protein_b0996_Inner_Membrane	C1909H3018N551O578S21	None	ProcessedProtein		{}	{}	im	{'PostTranslationReaction', 'ComplexFormation'}	protein_b0996
protein_b0997_Periplasm	C4215H6492N1189O1231S29	None	ProcessedProtein		{}	{}	p	{'PostTranslationReaction', 'ComplexFormation'}	protein_b0997
protein_b1002_Periplasm	C2032H3170N541O620S18	None	ProcessedProtein		{}	{}	p	{'PostTranslationReaction', 'ComplexFormation'}	protein_b1002
protein_b1006_Inner_Membrane	C2092H3357N525O554S26	None	ProcessedProtein		{}	{}	im	{'PostTranslationReaction', 'ComplexFormation'}	protein_b1006
protein_b1015_Inner_Membrane	C2532H3925N628O653S23	None	ProcessedProtein		{}	{}	im	{'PostTranslationReaction', 'ComplexFormation'}	protein_b1015
protein_b1069_Inner_Membrane	C2595H4137N635O645S23	None	ProcessedProtein		{}	{}	im	{'PostTranslationReaction', 'ComplexFormation'}	protein_b1069
protein_b1101_Inner_Membrane	C2352H3664N585O623S18	None	ProcessedProtein		{}	{}	im	{'PostTranslationReaction', 'ComplexFormation'}	protein_b1101
protein_b1102_Outer_Membrane	C3592H5409N969O1150S20	None	ProcessedProtein		{}	{}	om	{'PostTranslationReaction', 'ComplexFormation'}	protein_b1102
protein_b1116_Inner_Membrane	C1941H3155N521O552S20	None	ProcessedProtein		{}	{}	im	{'PostTranslationReaction', 'ComplexFormation'}	protein_b1116
protein_b1118_Inner_Membrane	C2063H3292N546O562S15	None	ProcessedProtein		{}	{}	im	{'PostTranslationReaction', 'ComplexFormation'}	protein_b1118
protein_b1123_Periplasm	C1757H2692N447O527S11	None	ProcessedProtein		{}	{}	p	{'PostTranslationReaction', 'ComplexFormation'}	protein_b1123
protein_b1124_Inner_Membrane	C1360H2165N324O349S15	None	ProcessedProtein		{}	{}	im	{'PostTranslationReaction', 'ComplexFormation'}	protein_b1124
protein_b1125_Inner_Membrane	C1484H2364N338O353S15	None	ProcessedProtein		{}	{}	im	{'PostTranslationReaction', 'ComplexFormation'}	protein_b1125
protein_b1185_Inner_Membrane	C951H1459N230O226S13	None	ProcessedProtein		{}	{}	im	{'PostTranslationReaction', 'ComplexFormation'}	protein_b1185
protein_b1186_Inner_Membrane	C2652H4158N639O689S22	None	ProcessedProtein		{}	{}	im	{'PostTranslationReaction', 'ComplexFormation'}	protein_b1186
protein_b1193_Outer_Membrane	C993H1576N275O288S8	None	ProcessedProtein		{}	{}	om	{'PostTranslationReaction'}	protein_b1193
protein_b1197_Periplasm	C2844H4346N771O853S20	None	ProcessedProtein		{}	{}	p	{'PostTranslationReaction', 'ComplexFormation'}	protein_b1197
protein_b1206_Inner_Membrane	C2736H4421N704O712S27	None	ProcessedProtein		{}	{}	im	{'PostTranslationReaction', 'ComplexFormation'}	protein_b1206
protein_b1209_Outer_Membrane	C1048H1648N292O312S7	None	ProcessedProtein		{}	{}	om	{'PostTranslationReaction'}	protein_b1209
protein_b1216_Inner_Membrane	C1812H2886N444O487S15	None	ProcessedProtein		{}	{}	im	{'PostTranslationReaction', 'ComplexFormation'}	protein_b1216
protein_b1223_Inner_Membrane	C2318H3566N571O600S21	None	ProcessedProtein		{}	{}	im	{'PostTranslationReaction', 'ComplexFormation'}	protein_b1223
protein_b1227_Inner_Membrane	C1195H1838N303O288S14	None	ProcessedProtein		{}	{}	im	{'PostTranslationReaction', 'ComplexFormation'}	protein_b1227
protein_b1243_Periplasm	C2740H4241N724O824S12	None	ProcessedProtein		{}	{}	p	{'PostTranslationReaction', 'ComplexFormation'}	protein_b1243
protein_b1244_Inner_Membrane	C1567H2497N383O392S15	None	ProcessedProtein		{}	{}	im	{'PostTranslationReaction', 'ComplexFormation'}	protein_b1244
protein_b1245_Inner_Membrane	C1515H2390N379O412S16	None	ProcessedProtein		{}	{}	im	{'PostTranslationReaction', 'ComplexFormation'}	protein_b1245
protein_b1249_Inner_Membrane	C2486H3930N668O670S29	None	ProcessedProtein		{}	{}	im	{'PostTranslationReaction', 'ComplexFormation'}	protein_b1249
protein_b1250_Inner_Membrane	C2107H3319N531O595S14	None	ProcessedProtein		{}	{}	im	{'PostTranslationReaction', 'ComplexFormation'}	protein_b1250
protein_b1252_Inner_Membrane	C1173H1909N324O337S5	None	ProcessedProtein		{}	{}	im	{'PostTranslationReaction', 'ComplexFormation'}	protein_b1252
protein_b1278_Inner_Membrane	C1358H2112N361O332S7	None	ProcessedProtein		{}	{}	im	{'PostTranslationReaction', 'ComplexFormation'}	protein_b1278
protein_b1296_Inner_Membrane	C2403H3696N577O609S14	None	ProcessedProtein		{}	{}	im	{'PostTranslationReaction', 'ComplexFormation'}	protein_b1296
protein_b1308_Periplasm	C515H828N140O148S4	None	ProcessedProtein		{}	{}	p	{'PostTranslationReaction', 'ComplexFormation'}	protein_b1308
protein_b1319_Outer_Membrane	C1567H2228N411O482S11	None	ProcessedProtein		{}	{}	om	{'PostTranslationReaction', 'ComplexFormation'}	protein_b1319
protein_b1329_Periplasm	C2709H4220N718O796S10	None	ProcessedProtein		{}	{}	p	{'PostTranslationReaction', 'ComplexFormation'}	protein_b1329
protein_b1363_Inner_Membrane	C2539H3883N600O648S24	None	ProcessedProtein		{}	{}	im	{'PostTranslationReaction', 'ComplexFormation'}	protein_b1363
protein_b1377_Outer_Membrane	C1819H2673N489O595S9	None	ProcessedProtein		{}	{}	om	{'PostTranslationReaction', 'ComplexFormation'}	protein_b1377
protein_b1386_Periplasm	C3789H5835N1015O1126S23	None	ProcessedProtein		{}	{}	p	{'PostTranslationReaction', 'ComplexFormation'}	protein_b1386
protein_b1440_Periplasm	C1914H2918N499O554S16	None	ProcessedProtein		{}	{}	p	{'PostTranslationReaction', 'ComplexFormation'}	protein_b1440
protein_b1442_Inner_Membrane	C1641H2512N379O398S14	None	ProcessedProtein		{}	{}	im	{'PostTranslationReaction', 'ComplexFormation'}	protein_b1442
protein_b1443_Inner_Membrane	C1349H2107N338O344S5	None	ProcessedProtein		{}	{}	im	{'PostTranslationReaction', 'ComplexFormation'}	protein_b1443
protein_b1453_Inner_Membrane	C2532H3913N621O651S24	None	ProcessedProtein		{}	{}	im	{'PostTranslationReaction', 'ComplexFormation'}	protein_b1453
protein_b1465_Inner_Membrane	C1222H1864N305O295S15	None	ProcessedProtein		{}	{}	im	{'PostTranslationReaction', 'ComplexFormation'}	protein_b1465
protein_b1469_Inner_Membrane	C2344H3627N577O586S20	None	ProcessedProtein		{}	{}	im	{'PostTranslationReaction', 'ComplexFormation'}	protein_b1469
protein_b1473_Inner_Membrane	C1490H2300N352O376S12	None	ProcessedProtein		{}	{}	im	{'PostTranslationReaction', 'ComplexFormation'}	protein_b1473
protein_b1474_Periplasm	C5023H7715N1395O1496S41Se	None	ProcessedProtein		{}	{}	p	{'PostTranslationReaction', 'ComplexFormation'}	protein_b1474
protein_b1475_Inner_Membrane	C1409H2193N390O431S23	None	ProcessedProtein		{}	{}	im	{'PostTranslationReaction', 'ComplexFormation'}	protein_b1475
protein_b1476_Inner_Membrane	C1197H1849N302O277S15	None	ProcessedProtein		{}	{}	im	{'PostTranslationReaction', 'ComplexFormation'}	protein_b1476
protein_b1485_Inner_Membrane	C1460H2342N385O386S16	None	ProcessedProtein		{}	{}	im	{'PostTranslationReaction', 'ComplexFormation'}	protein_b1485
protein_b1486_Inner_Membrane	C1753H2717N437O448S8	None	ProcessedProtein		{}	{}	im	{'PostTranslationReaction', 'ComplexFormation'}	protein_b1486
protein_b1487_Periplasm	C2583H4011N692O779S13	None	ProcessedProtein		{}	{}	p	{'PostTranslationReaction', 'ComplexFormation'}	protein_b1487
protein_b1492_Inner_Membrane	C2586H4054N611O665S23	None	ProcessedProtein		{}	{}	im	{'PostTranslationReaction', 'ComplexFormation'}	protein_b1492
protein_b1528_Inner_Membrane	C1996H3180N485O498S19	None	ProcessedProtein		{}	{}	im	{'PostTranslationReaction', 'ComplexFormation'}	protein_b1528
protein_b1533_Inner_Membrane	C1529H2425N367O367S16	None	ProcessedProtein		{}	{}	im	{'PostTranslationReaction', 'ComplexFormation'}	protein_b1533
protein_b1587_Periplasm	C3965H6266N1120O1196S32	None	ProcessedProtein		{}	{}	p	{'PostTranslationReaction', 'ComplexFormation'}	protein_b1587
protein_b1588_Periplasm	C3972H6203N1121O1194S38	None	ProcessedProtein		{}	{}	p	{'PostTranslationReaction', 'ComplexFormation'}	protein_b1588
protein_b1589_Periplasm	C985H1496N275O301S19	None	ProcessedProtein		{}	{}	p	{'PostTranslationReaction', 'ComplexFormation'}	protein_b1589
protein_b1590_Inner_Membrane	C1425H2245N361O347S17	None	ProcessedProtein		{}	{}	im	{'PostTranslationReaction', 'ComplexFormation'}	protein_b1590
protein_b1592_Inner_Membrane	C2022H3227N517O540S23	None	ProcessedProtein		{}	{}	im	{'PostTranslationReaction', 'ComplexFormation'}	protein_b1592
protein_b1599_Inner_Membrane	C560H884N138O130S3	None	ProcessedProtein		{}	{}	im	{'PostTranslationReaction', 'ComplexFormation'}	protein_b1599
protein_b1600_Inner_Membrane	C619H996N141O159S5	None	ProcessedProtein		{}	{}	im	{'PostTranslationReaction', 'ComplexFormation'}	protein_b1600
protein_b1602_Inner_Membrane	C2210H3514N568O623S22	None	ProcessedProtein		{}	{}	im	{'PostTranslationReaction', 'ComplexFormation'}	protein_b1602
protein_b1603_Inner_Membrane	C2461H3928N644O713S21	None	ProcessedProtein		{}	{}	im	{'PostTranslationReaction', 'ComplexFormation'}	protein_b1603
protein_b1605_Inner_Membrane	C2313H3680N562O586S24	None	ProcessedProtein		{}	{}	im	{'PostTranslationReaction', 'ComplexFormation'}	protein_b1605
protein_b1621_Inner_Membrane	C2612H4130N662O689S25	None	ProcessedProtein		{}	{}	im	{'PostTranslationReaction', 'ComplexFormation'}	protein_b1621
protein_b1634_Inner_Membrane	C2507H3923N605O656S30	None	ProcessedProtein		{}	{}	im	{'PostTranslationReaction', 'ComplexFormation'}	protein_b1634
protein_b1646_Periplasm	C765H1240N221O247S6	None	ProcessedProtein		{}	{}	p	{'PostTranslationReaction', 'ComplexFormation'}	protein_b1646
protein_b1677_Outer_Membrane	C349H602N108O118S4	None	ProcessedProtein		{}	{}	om	{'PostTranslationReaction'}	protein_b1677
protein_b1711_Inner_Membrane	C1619H2623N423O396S19	None	ProcessedProtein		{}	{}	im	{'PostTranslationReaction', 'ComplexFormation'}	protein_b1711
protein_b1801_Inner_Membrane	C2477H3813N597O647S18	None	ProcessedProtein		{}	{}	im	{'PostTranslationReaction', 'ComplexFormation'}	protein_b1801
protein_b1818_Inner_Membrane	C1257H2028N317O348S15	None	ProcessedProtein		{}	{}	im	{'PostTranslationReaction', 'ComplexFormation'}	protein_b1818
protein_b1819_Inner_Membrane	C1424H2256N369O377S12	None	ProcessedProtein		{}	{}	im	{'PostTranslationReaction', 'ComplexFormation'}	protein_b1819
protein_b1855_Inner_Membrane	C1689H2645N479O453S16	None	ProcessedProtein		{}	{}	im	{'PostTranslationReaction', 'ComplexFormation'}	protein_b1855
protein_b1857_Periplasm	C1508H2355N409O454S9	None	ProcessedProtein		{}	{}	p	{'PostTranslationReaction', 'ComplexFormation'}	protein_b1857
protein_b1859_Inner_Membrane	C1293H2100N311O328S15	None	ProcessedProtein		{}	{}	im	{'PostTranslationReaction', 'ComplexFormation'}	protein_b1859
protein_b1872_Periplasm	C3972H6159N1097O1172S29	None	ProcessedProtein		{}	{}	p	{'PostTranslationReaction', 'ComplexFormation'}	protein_b1872
protein_b1873_Inner_Membrane	C1764H2746N489O552S20	None	ProcessedProtein		{}	{}	im	{'PostTranslationReaction', 'ComplexFormation'}	protein_b1873
protein_b4460_Inner_Membrane	C1576H2555N388O421S17	None	ProcessedProtein		{}	{}	im	{'PostTranslationReaction', 'ComplexFormation'}	protein_b4460
protein_b1901_Periplasm	C1587H2527N420O475S14	None	ProcessedProtein		{}	{}	p	{'PostTranslationReaction', 'ComplexFormation'}	protein_b1901
protein_b1907_Inner_Membrane	C2009H3168N490O508S16	None	ProcessedProtein		{}	{}	im	{'PostTranslationReaction', 'ComplexFormation'}	protein_b1907
protein_b1912_Inner_Membrane	C983H1493N235O236S6	None	ProcessedProtein		{}	{}	im	{'PostTranslationReaction', 'ComplexFormation'}	protein_b1912
protein_b1981_Inner_Membrane	C2222H3431N555O573S23	None	ProcessedProtein		{}	{}	im	{'PostTranslationReaction', 'ComplexFormation'}	protein_b1981
protein_b1992_Inner_Membrane	C1206H1963N318O314S14	None	ProcessedProtein		{}	{}	im	{'PostTranslationReaction', 'ComplexFormation'}	protein_b1992
protein_b2010_Inner_Membrane	C1926H2998N545O573S12	None	ProcessedProtein		{}	{}	im	{'PostTranslationReaction', 'ComplexFormation'}	protein_b2010
protein_b2027_Inner_Membrane	C1610H2623N447O497S8	None	ProcessedProtein		{}	{}	im	{'PostTranslationReaction', 'ComplexFormation'}	protein_b2027
protein_b2035_Inner_Membrane	C2132H3251N475O534S21	None	ProcessedProtein		{}	{}	im	{'PostTranslationReaction', 'ComplexFormation'}	protein_b2035
protein_b2037_Inner_Membrane	C2131H3450N510O546S14	None	ProcessedProtein		{}	{}	im	{'PostTranslationReaction', 'ComplexFormation'}	protein_b2037
protein_b2092_Inner_Membrane	C2245H3588N563O571S24	None	ProcessedProtein		{}	{}	im	{'PostTranslationReaction', 'ComplexFormation'}	protein_b2092
protein_b2128_Inner_Membrane	C1201H1930N298O303S4	None	ProcessedProtein		{}	{}	im	{'PostTranslationReaction', 'ComplexFormation'}	protein_b2128
protein_b2130_Inner_Membrane	C1931H3101N483O476S14	None	ProcessedProtein		{}	{}	im	{'PostTranslationReaction', 'ComplexFormation'}	protein_b2130
protein_b2131_Periplasm	C1472H2335N386O440S4	None	ProcessedProtein		{}	{}	p	{'PostTranslationReaction', 'ComplexFormation'}	protein_b2131
protein_b2132_Periplasm	C3702H5864N1001O1135S28	None	ProcessedProtein		{}	{}	p	{'PostTranslationReaction', 'ComplexFormation'}	protein_b2132
protein_b2134_Periplasm	C1505H2453N420O435S16	None	ProcessedProtein		{}	{}	p	{'PostTranslationReaction', 'ComplexFormation'}	protein_b2134
protein_b2148_Inner_Membrane	C1668H2634N392O441S10	None	ProcessedProtein		{}	{}	im	{'PostTranslationReaction', 'ComplexFormation'}	protein_b2148
protein_b2150_Periplasm	C1577H2525N434O491S9	None	ProcessedProtein		{}	{}	p	{'PostTranslationReaction', 'ComplexFormation'}	protein_b2150
protein_b2155_Outer_Membrane	C3261H4988N906O1040S11	None	ProcessedProtein		{}	{}	om	{'PostTranslationReaction', 'ComplexFormation'}	protein_b2155
protein_b2156_Inner_Membrane	C2515H3823N604O647S18	None	ProcessedProtein		{}	{}	im	{'PostTranslationReaction', 'ComplexFormation'}	protein_b2156
protein_b2167_Inner_Membrane	C2604H4241N671O726S30	None	ProcessedProtein		{}	{}	im	{'PostTranslationReaction', 'ComplexFormation'}	protein_b2167
protein_b2170_Inner_Membrane	C1983H3112N493O502S27	None	ProcessedProtein		{}	{}	im	{'PostTranslationReaction', 'ComplexFormation'}	protein_b2170
protein_b2174_Inner_Membrane	C1265H1982N309O306S11	None	ProcessedProtein		{}	{}	im	{'PostTranslationReaction', 'ComplexFormation'}	protein_b2174
protein_b2197_Periplasm	C785H1258N220O233S6	None	ProcessedProtein		{}	{}	p	{'PostTranslationReaction', 'ComplexFormation'}	protein_b2197
protein_b2198_Inner_Membrane	C354H556N100O88S4	None	ProcessedProtein		{}	{}	im	{'PostTranslationReaction', 'ComplexFormation'}	protein_b2198
protein_b2199_Inner_Membrane	C1317H2029N336O307S13	None	ProcessedProtein		{}	{}	im	{'PostTranslationReaction', 'ComplexFormation'}	protein_b2199
protein_b2200_Inner_Membrane	C1116H1803N266O272S10	None	ProcessedProtein		{}	{}	im	{'PostTranslationReaction', 'ComplexFormation'}	protein_b2200
protein_b2202_Inner_Membrane	C1013H1581N296O289S18	None	ProcessedProtein		{}	{}	im	{'PostTranslationReaction', 'ComplexFormation'}	protein_b2202
protein_b2203_Periplasm	C710H1113N204O215S11	None	ProcessedProtein		{}	{}	p	{'PostTranslationReaction', 'ComplexFormation'}	protein_b2203
protein_b2204_Inner_Membrane	C1444H2281N394O380S20	None	ProcessedProtein		{}	{}	im	{'PostTranslationReaction', 'ComplexFormation'}	protein_b2204
protein_b2205_Periplasm	C1069H1745N324O324S19	None	ProcessedProtein		{}	{}	p	{'PostTranslationReaction', 'ComplexFormation'}	protein_b2205
protein_b2206_Periplasm	C4171H6441N1152O1202S34	None	ProcessedProtein		{}	{}	p	{'PostTranslationReaction', 'ComplexFormation'}	protein_b2206
protein_b2215_Outer_Membrane	C1795H2664N482O577S4	None	ProcessedProtein		{}	{}	om	{'PostTranslationReaction', 'ComplexFormation'}	protein_b2215
protein_b2223_Inner_Membrane	C2213H3444N535O564S30	None	ProcessedProtein		{}	{}	im	{'PostTranslationReaction', 'ComplexFormation'}	protein_b2223
protein_b2239_Periplasm	C1831H2808N477O551S16	None	ProcessedProtein		{}	{}	p	{'PostTranslationReaction', 'ComplexFormation'}	protein_b2239
protein_b2240_Inner_Membrane	C2363H3555N571O589S29	None	ProcessedProtein		{}	{}	im	{'PostTranslationReaction', 'ComplexFormation'}	protein_b2240
protein_b2254_Inner_Membrane	C1629H2587N447O462S16	None	ProcessedProtein		{}	{}	im	{'PostTranslationReaction', 'ComplexFormation'}	protein_b2254
protein_b2257_Inner_Membrane	C2964H4466N721O732S20	None	ProcessedProtein		{}	{}	im	{'PostTranslationReaction', 'ComplexFormation'}	protein_b2257
protein_b4544_Inner_Membrane	C578H926N143O131S7	None	ProcessedProtein		{}	{}	im	{'PostTranslationReaction', 'ComplexFormation'}	protein_b4544
protein_b2258_Inner_Membrane	C673H1053N152O158S9	None	ProcessedProtein		{}	{}	im	{'PostTranslationReaction', 'ComplexFormation'}	protein_b2258
protein_b2276_Inner_Membrane	C2448H3837N582O624S20	None	ProcessedProtein		{}	{}	im	{'PostTranslationReaction', 'ComplexFormation'}	protein_b2276
protein_b2277_Inner_Membrane	C2684H4095N625O655S29	None	ProcessedProtein		{}	{}	im	{'PostTranslationReaction', 'ComplexFormation'}	protein_b2277
protein_b2278_Inner_Membrane	C3113H4832N753O788S32	None	ProcessedProtein		{}	{}	im	{'PostTranslationReaction', 'ComplexFormation'}	protein_b2278
protein_b2279_Inner_Membrane	C494H818N132O130S5	None	ProcessedProtein		{}	{}	im	{'PostTranslationReaction', 'ComplexFormation'}	protein_b2279
protein_b2280_Inner_Membrane	C925H1470N225O244S7	None	ProcessedProtein		{}	{}	im	{'PostTranslationReaction', 'ComplexFormation'}	protein_b2280
protein_b2282_Inner_Membrane	C1715H2609N402O422S19	None	ProcessedProtein		{}	{}	im	{'PostTranslationReaction', 'ComplexFormation'}	protein_b2282
protein_b2288_Inner_Membrane	C759H1180N202O194S7	None	ProcessedProtein		{}	{}	im	{'PostTranslationReaction', 'ComplexFormation'}	protein_b2288
protein_b2307_Inner_Membrane	C1271H1966N306O320S7	None	ProcessedProtein		{}	{}	im	{'PostTranslationReaction', 'ComplexFormation'}	protein_b2307
protein_b2308_Inner_Membrane	C1147H1820N280O302S9	None	ProcessedProtein		{}	{}	im	{'PostTranslationReaction', 'ComplexFormation'}	protein_b2308
protein_b2309_Periplasm	C1272H2015N335O393S6	None	ProcessedProtein		{}	{}	p	{'PostTranslationReaction', 'ComplexFormation'}	protein_b2309
protein_b2310_Periplasm	C1246H1967N328O391S6	None	ProcessedProtein		{}	{}	p	{'PostTranslationReaction', 'ComplexFormation'}	protein_b2310
protein_b2328_Periplasm	C1339H2126N380O386S13	None	ProcessedProtein		{}	{}	p	{'PostTranslationReaction', 'ComplexFormation'}	protein_b2328
protein_b2344_Outer_Membrane	C2177H3232N582O672S7	None	ProcessedProtein		{}	{}	om	{'PostTranslationReaction', 'ComplexFormation'}	protein_b2344
protein_b2392_Inner_Membrane	C2046H3281N521O530S17	None	ProcessedProtein		{}	{}	im	{'PostTranslationReaction', 'ComplexFormation'}	protein_b2392
protein_b2393_Inner_Membrane	C2023H3207N484O535S19	None	ProcessedProtein		{}	{}	im	{'PostTranslationReaction', 'ComplexFormation'}	protein_b2393
protein_b2406_Inner_Membrane	C2167H3303N505O549S29	None	ProcessedProtein		{}	{}	im	{'PostTranslationReaction', 'ComplexFormation'}	protein_b2406
protein_b2423_Inner_Membrane	C1517H2370N375O391S13	None	ProcessedProtein		{}	{}	im	{'PostTranslationReaction', 'ComplexFormation'}	protein_b2423
protein_b2424_Inner_Membrane	C1424H2218N340O369S9	None	ProcessedProtein		{}	{}	im	{'PostTranslationReaction', 'ComplexFormation'}	protein_b2424
protein_b2425_Periplasm	C1693H2634N456O505S5	None	ProcessedProtein		{}	{}	p	{'PostTranslationReaction', 'ComplexFormation'}	protein_b2425
protein_b2429_Inner_Membrane	C2297H3618N581O604S24	None	ProcessedProtein		{}	{}	im	{'PostTranslationReaction', 'ComplexFormation'}	protein_b2429
protein_b2435_Periplasm	C1391H2296N412O407S4	None	ProcessedProtein		{}	{}	p	{'PostTranslationReaction', 'ComplexFormation'}	protein_b2435
protein_b2470_Inner_Membrane	C5078H8016N1343O1484S44	None	ProcessedProtein		{}	{}	im	{'PostTranslationReaction', 'ComplexFormation'}	protein_b2470
protein_b2477_Outer_Membrane	C1607H2568N455O516S10	None	ProcessedProtein		{}	{}	om	{'PostTranslationReaction'}	protein_b2477
protein_b2482_Inner_Membrane	C3367H5338N842O852S42	None	ProcessedProtein		{}	{}	im	{'PostTranslationReaction', 'ComplexFormation'}	protein_b2482
protein_b2483_Inner_Membrane	C1606H2553N392O406S16	None	ProcessedProtein		{}	{}	im	{'PostTranslationReaction', 'ComplexFormation'}	protein_b2483
protein_b2484_Inner_Membrane	C2436H3794N583O617S20	None	ProcessedProtein		{}	{}	im	{'PostTranslationReaction', 'ComplexFormation'}	protein_b2484
protein_b2485_Inner_Membrane	C1082H1771N267O271S16	None	ProcessedProtein		{}	{}	im	{'PostTranslationReaction', 'ComplexFormation'}	protein_b2485
protein_b2486_Inner_Membrane	C2645H4210N647O673S29	None	ProcessedProtein		{}	{}	im	{'PostTranslationReaction', 'ComplexFormation'}	protein_b2486
protein_b2492_Inner_Membrane	C1400H2208N356O357S26	None	ProcessedProtein		{}	{}	im	{'PostTranslationReaction', 'ComplexFormation'}	protein_b2492
protein_b2497_Inner_Membrane	C2110H3401N504O547S15	None	ProcessedProtein		{}	{}	im	{'PostTranslationReaction', 'ComplexFormation'}	protein_b2497
protein_b2512_Outer_Membrane	C1854H2922N504O584S8	None	ProcessedProtein		{}	{}	om	{'PostTranslationReaction'}	protein_b2512
protein_b2519_Inner_Membrane	C3830H6039N1091O1063S22	None	ProcessedProtein		{}	{}	im	{'PostTranslationReaction', 'ComplexFormation'}	protein_b2519
protein_b2536_Inner_Membrane	C1964H3042N485O472S19	None	ProcessedProtein		{}	{}	im	{'PostTranslationReaction', 'ComplexFormation'}	protein_b2536
protein_b2558_Periplasm	C2631H4073N686O789S11	None	ProcessedProtein		{}	{}	p	{'PostTranslationReaction', 'ComplexFormation'}	protein_b2558
protein_b2578_Inner_Membrane	C1001H1561N243O250S8	None	ProcessedProtein		{}	{}	im	{'PostTranslationReaction', 'ComplexFormation'}	protein_b2578
protein_b2587_Inner_Membrane	C2165H3389N547O572S26	None	ProcessedProtein		{}	{}	im	{'PostTranslationReaction', 'ComplexFormation'}	protein_b2587
protein_b2595_Outer_Membrane	C1233H1910N342O374S10	None	ProcessedProtein		{}	{}	om	{'PostTranslationReaction'}	protein_b2595
protein_b2617_Outer_Membrane	C540H863N150O166S6	None	ProcessedProtein		{}	{}	om	{'PostTranslationReaction'}	protein_b2617
protein_b2663_Inner_Membrane	C2392H3767N583O602S24	None	ProcessedProtein		{}	{}	im	{'PostTranslationReaction', 'ComplexFormation'}	protein_b2663
protein_b2678_Inner_Membrane	C1729H2781N447O457S15	None	ProcessedProtein		{}	{}	im	{'PostTranslationReaction', 'ComplexFormation'}	protein_b2678
protein_b2679_Periplasm	C1620H2466N428O487S9	None	ProcessedProtein		{}	{}	p	{'PostTranslationReaction', 'ComplexFormation'}	protein_b2679
protein_b2682_Inner_Membrane	C1206H1871N299O321S13	None	ProcessedProtein		{}	{}	im	{'PostTranslationReaction', 'ComplexFormation'}	protein_b2682
protein_b2683_Inner_Membrane	C558H919N143O140S5	None	ProcessedProtein		{}	{}	im	{'PostTranslationReaction', 'ComplexFormation'}	protein_b2683
protein_b2701_Outer_Membrane	C1817H2780N496O519S12	None	ProcessedProtein		{}	{}	om	{'PostTranslationReaction'}	protein_b2701
protein_b2702_Inner_Membrane	C953H1484N236O249S11	None	ProcessedProtein		{}	{}	im	{'PostTranslationReaction', 'ComplexFormation'}	protein_b2702
protein_b2703_Inner_Membrane	C1519H2439N391O427S10	None	ProcessedProtein		{}	{}	im	{'PostTranslationReaction', 'ComplexFormation'}	protein_b2703
protein_b2715_Inner_Membrane	C2340H3801N583O631S26	None	ProcessedProtein		{}	{}	im	{'PostTranslationReaction', 'ComplexFormation'}	protein_b2715
protein_b2722_Inner_Membrane	C1543H2443N376O399S12	None	ProcessedProtein		{}	{}	im	{'PostTranslationReaction', 'ComplexFormation'}	protein_b2722
protein_b2723_Inner_Membrane	C2974H4762N746O748S36	None	ProcessedProtein		{}	{}	im	{'PostTranslationReaction', 'ComplexFormation'}	protein_b2723
protein_b2789_Inner_Membrane	C2305H3531N560O583S23	None	ProcessedProtein		{}	{}	im	{'PostTranslationReaction', 'ComplexFormation'}	protein_b2789
protein_b2796_Inner_Membrane	C2180H3453N522O561S30	None	ProcessedProtein		{}	{}	im	{'PostTranslationReaction', 'ComplexFormation'}	protein_b2796
protein_b2801_Inner_Membrane	C2209H3409N540O580S19	None	ProcessedProtein		{}	{}	im	{'PostTranslationReaction', 'ComplexFormation'}	protein_b2801
protein_b2813_Outer_Membrane	C1808H2765N509O525S12	None	ProcessedProtein		{}	{}	om	{'PostTranslationReaction'}	protein_b2813
protein_b2817_Periplasm	C2022H3295N574O603S11	None	ProcessedProtein		{}	{}	p	{'PostTranslationReaction', 'ComplexFormation'}	protein_b2817
protein_b2828_Inner_Membrane	C1569H2349N387O381S12	None	ProcessedProtein		{}	{}	im	{'PostTranslationReaction', 'ComplexFormation'}	protein_b2828
protein_b2835_Inner_Membrane	C1935H3072N482O500S18	None	ProcessedProtein		{}	{}	im	{'PostTranslationReaction', 'ComplexFormation'}	protein_b2835
protein_b2836_Inner_Membrane	C3661H5821N990O1009S27	None	ProcessedProtein		{}	{}	im	{'PostTranslationReaction', 'ComplexFormation'}	protein_b2836
protein_b2841_Inner_Membrane	C2358H3772N601O631S33	None	ProcessedProtein		{}	{}	im	{'PostTranslationReaction', 'ComplexFormation'}	protein_b2841
protein_b2882_Inner_Membrane	C2250H3613N558O616S24	None	ProcessedProtein		{}	{}	im	{'PostTranslationReaction', 'ComplexFormation'}	protein_b2882
protein_b2893_Periplasm	C1139H1811N296O341S16	None	ProcessedProtein		{}	{}	p	{'PostTranslationReaction', 'ComplexFormation'}	protein_b2893
protein_b2923_Inner_Membrane	C1090H1687N270O264S12	None	ProcessedProtein		{}	{}	im	{'PostTranslationReaction', 'ComplexFormation'}	protein_b2923
protein_b2938_Periplasm	C3261H5028N897O1002S32	None	ProcessedProtein		{}	{}	p	{'PostTranslationReaction', 'ComplexFormation'}	protein_b2938
protein_b2943_Inner_Membrane	C2355H3716N594O613S26	None	ProcessedProtein		{}	{}	im	{'PostTranslationReaction', 'ComplexFormation'}	protein_b2943
protein_b2957_Periplasm	C1623H2594N439O517S10	None	ProcessedProtein		{}	{}	p	{'PostTranslationReaction', 'ComplexFormation'}	protein_b2957
protein_b2963_Outer_Membrane	C1780H2819N499O537S10	None	ProcessedProtein		{}	{}	om	{'PostTranslationReaction'}	protein_b2963
protein_b2964_Inner_Membrane	C2183H3343N504O553S28	None	ProcessedProtein		{}	{}	im	{'PostTranslationReaction', 'ComplexFormation'}	protein_b2964
protein_b2975_Inner_Membrane	C2778H4342N650O713S21	None	ProcessedProtein		{}	{}	im	{'PostTranslationReaction', 'ComplexFormation'}	protein_b2975
protein_b2987_Inner_Membrane	C2455H3950N641O659S26	None	ProcessedProtein		{}	{}	im	{'PostTranslationReaction', 'ComplexFormation'}	protein_b2987
protein_b2994_Periplasm	C2795H4343N755O828S18	None	ProcessedProtein		{}	{}	p	{'PostTranslationReaction', 'ComplexFormation'}	protein_b2994
protein_b2995_Inner_Membrane	C2064H3181N492O507S19	None	ProcessedProtein		{}	{}	im	{'PostTranslationReaction', 'ComplexFormation'}	protein_b2995
protein_b2996_Periplasm	C1570H2471N442O481S24	None	ProcessedProtein		{}	{}	p	{'PostTranslationReaction', 'ComplexFormation'}	protein_b2996
protein_b2997_Periplasm	C1738H2728N503O523S19	None	ProcessedProtein		{}	{}	p	{'PostTranslationReaction', 'ComplexFormation'}	protein_b2997
protein_b3005_Inner_Membrane	C690H1104N173O213S9	None	ProcessedProtein		{}	{}	im	{'PostTranslationReaction', 'ComplexFormation'}	protein_b3005
protein_b3006_Inner_Membrane	C1172H1893N329O340S8	None	ProcessedProtein		{}	{}	im	{'PostTranslationReaction', 'ComplexFormation'}	protein_b3006
protein_b3035_Outer_Membrane	C2334H3731N671O772S6	None	ProcessedProtein		{}	{}	om	{'PostTranslationReaction', 'ComplexFormation'}	protein_b3035
protein_b3040_Inner_Membrane	C1218H1966N297O325S16	None	ProcessedProtein		{}	{}	im	{'PostTranslationReaction', 'ComplexFormation'}	protein_b3040
protein_b3057_Inner_Membrane	C1396H2188N335O347S17	None	ProcessedProtein		{}	{}	im	{'PostTranslationReaction', 'ComplexFormation'}	protein_b3057
protein_b3059_Inner_Membrane	C1038H1624N263O256S10	None	ProcessedProtein		{}	{}	im	{'PostTranslationReaction', 'ComplexFormation'}	protein_b3059
protein_b3063_Inner_Membrane	C2511H3887N577O622S25	None	ProcessedProtein		{}	{}	im	{'PostTranslationReaction', 'ComplexFormation'}	protein_b3063
protein_b3089_Inner_Membrane	C1977H3214N507O539S20	None	ProcessedProtein		{}	{}	im	{'PostTranslationReaction', 'ComplexFormation'}	protein_b3089
protein_b3093_Inner_Membrane	C2399H3669N597O615S27	None	ProcessedProtein		{}	{}	im	{'PostTranslationReaction', 'ComplexFormation'}	protein_b3093
protein_b3116_Inner_Membrane	C2293H3560N539O594S22	None	ProcessedProtein		{}	{}	im	{'PostTranslationReaction', 'ComplexFormation'}	protein_b3116
protein_b3127_Inner_Membrane	C2314H3542N543O580S24	None	ProcessedProtein		{}	{}	im	{'PostTranslationReaction', 'ComplexFormation'}	protein_b3127
protein_b3161_Inner_Membrane	C2089H3238N496O533S16	None	ProcessedProtein		{}	{}	im	{'PostTranslationReaction', 'ComplexFormation'}	protein_b3161
protein_b3175_Inner_Membrane	C509H817N130O153S5	None	ProcessedProtein		{}	{}	im	{'PostTranslationReaction', 'ComplexFormation'}	protein_b3175
protein_b3182_Periplasm	C2300H3656N643O680S19	None	ProcessedProtein		{}	{}	p	{'PostTranslationReaction', 'ComplexFormation'}	protein_b3182
protein_b3196_Inner_Membrane	C1610H2627N401O426S10	None	ProcessedProtein		{}	{}	im	{'PostTranslationReaction', 'ComplexFormation'}	protein_b3196
protein_b3199_Inner_Membrane	C961H1534N262O299S5	None	ProcessedProtein		{}	{}	im	{'PostTranslationReaction', 'ComplexFormation'}	protein_b3199
protein_b3200_Periplasm	C886H1436N244O279S5	None	ProcessedProtein		{}	{}	p	{'PostTranslationReaction', 'ComplexFormation'}	protein_b3200
protein_b3224_Inner_Membrane	C2500H3882N630O635S20	None	ProcessedProtein		{}	{}	im	{'PostTranslationReaction', 'ComplexFormation'}	protein_b3224
protein_b3258_Inner_Membrane	C2412H3872N591O619S21	None	ProcessedProtein		{}	{}	im	{'PostTranslationReaction', 'ComplexFormation'}	protein_b3258
protein_b3265_Inner_Membrane	C1814H2938N511O578S5	None	ProcessedProtein		{}	{}	im	{'PostTranslationReaction'}	protein_b3265
protein_b3266_Inner_Membrane	C5039H7993N1295O1459S43	None	ProcessedProtein		{}	{}	im	{'PostTranslationReaction', 'ComplexFormation'}	protein_b3266
protein_b3300_Inner_Membrane	C2259H3584N566O580S18	None	ProcessedProtein		{}	{}	im	{'PostTranslationReaction', 'ComplexFormation'}	protein_b3300
protein_b3350_Inner_Membrane	C3024H4818N797O821S29	None	ProcessedProtein		{}	{}	im	{'PostTranslationReaction', 'ComplexFormation'}	protein_b3350
protein_b3367_Inner_Membrane	C1326H2031N329O346S14	None	ProcessedProtein		{}	{}	im	{'PostTranslationReaction', 'ComplexFormation'}	protein_b3367
protein_b3370_Inner_Membrane	C2225H3480N526O580S22	None	ProcessedProtein		{}	{}	im	{'PostTranslationReaction', 'ComplexFormation'}	protein_b3370
protein_b3396_Inner_Membrane	C4177H6506N1152O1246S26	None	ProcessedProtein		{}	{}	im	{'PostTranslationReaction', 'ComplexFormation'}	protein_b3396
protein_b3409_Inner_Membrane	C3828H6053N987O1078S41	None	ProcessedProtein		{}	{}	im	{'PostTranslationReaction', 'ComplexFormation'}	protein_b3409
protein_b3415_Inner_Membrane	C2133H3444N507O553S29	None	ProcessedProtein		{}	{}	im	{'PostTranslationReaction', 'ComplexFormation'}	protein_b3415
protein_b4476_Inner_Membrane	C2144H3431N520O556S32	None	ProcessedProtein		{}	{}	im	{'PostTranslationReaction', 'ComplexFormation'}	protein_b4476
protein_b3447_Periplasm	C2741H4312N734O852S18	None	ProcessedProtein		{}	{}	p	{'PostTranslationReaction', 'ComplexFormation'}	protein_b3447
protein_b3451_Inner_Membrane	C1485H2301N346O372S17	None	ProcessedProtein		{}	{}	im	{'PostTranslationReaction', 'ComplexFormation'}	protein_b3451
protein_b3452_Inner_Membrane	C1600H2378N367O399S4	None	ProcessedProtein		{}	{}	im	{'PostTranslationReaction', 'ComplexFormation'}	protein_b3452
protein_b3453_Periplasm	C2173H3329N570O656S16	None	ProcessedProtein		{}	{}	p	{'PostTranslationReaction', 'ComplexFormation'}	protein_b3453
protein_b3456_Inner_Membrane	C2169H3421N532O545S19	None	ProcessedProtein		{}	{}	im	{'PostTranslationReaction', 'ComplexFormation'}	protein_b3456
protein_b3457_Inner_Membrane	C1520H2403N369O404S21	None	ProcessedProtein		{}	{}	im	{'PostTranslationReaction', 'ComplexFormation'}	protein_b3457
protein_b3458_Periplasm	C1737H2749N476O539S14	None	ProcessedProtein		{}	{}	p	{'PostTranslationReaction', 'ComplexFormation'}	protein_b3458
protein_b3460_Periplasm	C1738H2752N466O536S10	None	ProcessedProtein		{}	{}	p	{'PostTranslationReaction', 'ComplexFormation'}	protein_b3460
protein_b3469_Inner_Membrane	C3402H5581N951O1020S22	None	ProcessedProtein		{}	{}	im	{'PostTranslationReaction', 'ComplexFormation'}	protein_b3469
protein_b3476_Periplasm	C2662H4120N702O773S12	None	ProcessedProtein		{}	{}	p	{'PostTranslationReaction', 'ComplexFormation'}	protein_b3476
protein_b3477_Inner_Membrane	C1631H2582N430O404S18	None	ProcessedProtein		{}	{}	im	{'PostTranslationReaction', 'ComplexFormation'}	protein_b3477
protein_b3478_Inner_Membrane	C1396H2199N368O359S15	None	ProcessedProtein		{}	{}	im	{'PostTranslationReaction', 'ComplexFormation'}	protein_b3478
protein_b3493_Inner_Membrane	C2427H3914N634O664S25	None	ProcessedProtein		{}	{}	im	{'PostTranslationReaction', 'ComplexFormation'}	protein_b3493
protein_b3496_Inner_Membrane	C2533H3906N585O629S30	None	ProcessedProtein		{}	{}	im	{'PostTranslationReaction', 'ComplexFormation'}	protein_b3496
protein_b3502_Inner_Membrane	C2148H3396N511O544S13	None	ProcessedProtein		{}	{}	im	{'PostTranslationReaction', 'ComplexFormation'}	protein_b3502
protein_b3528_Inner_Membrane	C2097H3400N516O562S19	None	ProcessedProtein		{}	{}	im	{'PostTranslationReaction', 'ComplexFormation'}	protein_b3528
protein_b3542_Inner_Membrane	C1498H2370N374O388S15	None	ProcessedProtein		{}	{}	im	{'PostTranslationReaction', 'ComplexFormation'}	protein_b3542
protein_b3543_Inner_Membrane	C1729H2767N446O439S21	None	ProcessedProtein		{}	{}	im	{'PostTranslationReaction', 'ComplexFormation'}	protein_b3543
protein_b3544_Periplasm	C2711H4184N711O803S22	None	ProcessedProtein		{}	{}	p	{'PostTranslationReaction', 'ComplexFormation'}	protein_b3544
protein_b3546_Inner_Membrane	C2879H4477N779O813S25	None	ProcessedProtein		{}	{}	im	{'PostTranslationReaction', 'ComplexFormation'}	protein_b3546
protein_b3566_Periplasm	C1578H2576N431O489S10	None	ProcessedProtein		{}	{}	p	{'PostTranslationReaction', 'ComplexFormation'}	protein_b3566
protein_b3568_Inner_Membrane	C1872H3039N486O501S21	None	ProcessedProtein		{}	{}	im	{'PostTranslationReaction', 'ComplexFormation'}	protein_b3568
protein_b3571_Periplasm	C3400H5076N918O1013S21	None	ProcessedProtein		{}	{}	p	{'PostTranslationReaction', 'ComplexFormation'}	protein_b3571
protein_b3577_Inner_Membrane	C822H1296N199O210S6	None	ProcessedProtein		{}	{}	im	{'PostTranslationReaction', 'ComplexFormation'}	protein_b3577
protein_b3578_Inner_Membrane	C2137H3397N495O528S28	None	ProcessedProtein		{}	{}	im	{'PostTranslationReaction', 'ComplexFormation'}	protein_b3578
protein_b3579_Periplasm	C1609H2547N435O481S9	None	ProcessedProtein		{}	{}	p	{'PostTranslationReaction', 'ComplexFormation'}	protein_b3579
protein_b3599_Inner_Membrane	C3060H4905N805O879S29	None	ProcessedProtein		{}	{}	im	{'PostTranslationReaction', 'ComplexFormation'}	protein_b3599
protein_b3603_Inner_Membrane	C2807H4321N650O712S19	None	ProcessedProtein		{}	{}	im	{'PostTranslationReaction', 'ComplexFormation'}	protein_b3603
protein_b3622_Inner_Membrane	C2195H3495N530O575S12	None	ProcessedProtein		{}	{}	im	{'PostTranslationReaction', 'ComplexFormation'}	protein_b3622
protein_b3653_Inner_Membrane	C1970H3166N478O507S24	None	ProcessedProtein		{}	{}	im	{'PostTranslationReaction', 'ComplexFormation'}	protein_b3653
protein_b3654_Inner_Membrane	C2231H3611N562O612S24	None	ProcessedProtein		{}	{}	im	{'PostTranslationReaction', 'ComplexFormation'}	protein_b3654
protein_b3666_Inner_Membrane	C2357H3649N569O622S22	None	ProcessedProtein		{}	{}	im	{'PostTranslationReaction', 'ComplexFormation'}	protein_b3666
protein_b3679_Inner_Membrane	C2918H4570N701O741S24	None	ProcessedProtein		{}	{}	im	{'PostTranslationReaction', 'ComplexFormation'}	protein_b3679
protein_b3691_Inner_Membrane	C2221H3407N537O555S18	None	ProcessedProtein		{}	{}	im	{'PostTranslationReaction', 'ComplexFormation'}	protein_b3691
protein_b3705_Inner_Membrane	C2805H4331N715O795S23	None	ProcessedProtein		{}	{}	im	{'PostTranslationReaction', 'ComplexFormation'}	protein_b3705
protein_b3709_Inner_Membrane	C2155H3293N497O536S15	None	ProcessedProtein		{}	{}	im	{'PostTranslationReaction', 'ComplexFormation'}	protein_b3709
protein_b3714_Inner_Membrane	C2164H3441N530O576S24	None	ProcessedProtein		{}	{}	im	{'PostTranslationReaction', 'ComplexFormation'}	protein_b3714
protein_b3722_Inner_Membrane	C3069H4812N757O839S23	None	ProcessedProtein		{}	{}	im	{'PostTranslationReaction', 'ComplexFormation'}	protein_b3722
protein_b3726_Inner_Membrane	C1492H2403N375O385S18	None	ProcessedProtein		{}	{}	im	{'PostTranslationReaction', 'ComplexFormation'}	protein_b3726
protein_b3727_Inner_Membrane	C1613H2536N370O408S15	None	ProcessedProtein		{}	{}	im	{'PostTranslationReaction', 'ComplexFormation'}	protein_b3727
protein_b3728_Periplasm	C1674H2613N434O507S3	None	ProcessedProtein		{}	{}	p	{'PostTranslationReaction', 'ComplexFormation'}	protein_b3728
protein_b3731_Inner_Membrane	C657H1058N182O204S5	None	ProcessedProtein		{}	{}	im	{'PostTranslationReaction', 'ComplexFormation'}	protein_b3731
protein_b3736_Inner_Membrane	C757H1268N218O232S4	None	ProcessedProtein		{}	{}	im	{'PostTranslationReaction', 'ComplexFormation'}	protein_b3736
protein_b3737_Inner_Membrane	C380H617N90O97S8	None	ProcessedProtein		{}	{}	im	{'PostTranslationReaction', 'ComplexFormation'}	protein_b3737
protein_b3738_Inner_Membrane	C1441H2232N333O358S11	None	ProcessedProtein		{}	{}	im	{'PostTranslationReaction', 'ComplexFormation'}	protein_b3738
protein_b3739_Inner_Membrane	C651H1052N158O147S2	None	ProcessedProtein		{}	{}	im	{'PostTranslationReaction', 'ComplexFormation'}	protein_b3739
protein_b3747_Inner_Membrane	C3216H5064N810O833S28	None	ProcessedProtein		{}	{}	im	{'PostTranslationReaction', 'ComplexFormation'}	protein_b3747
protein_b3750_Inner_Membrane	C1534H2518N392O416S11	None	ProcessedProtein		{}	{}	im	{'PostTranslationReaction', 'ComplexFormation'}	protein_b3750
protein_b3751_Periplasm	C1358H2246N381O426S7	None	ProcessedProtein		{}	{}	p	{'PostTranslationReaction', 'ComplexFormation'}	protein_b3751
protein_b3784_Inner_Membrane	C1929H3029N480O462S20	None	ProcessedProtein		{}	{}	im	{'PostTranslationReaction', 'ComplexFormation'}	protein_b3784
protein_b3785_Inner_Membrane	C1748H2752N494O516S17	None	ProcessedProtein		{}	{}	im	{'PostTranslationReaction', 'ComplexFormation'}	protein_b3785
protein_b3792_Inner_Membrane	C2110H3348N520O533S14	None	ProcessedProtein		{}	{}	im	{'PostTranslationReaction', 'ComplexFormation'}	protein_b3792
protein_b3793_Inner_Membrane	C2474H3730N582O585S17	None	ProcessedProtein		{}	{}	im	{'PostTranslationReaction', 'ComplexFormation'}	protein_b3793
protein_b3816_Inner_Membrane	C1649H2535N434O486S11	None	ProcessedProtein		{}	{}	im	{'PostTranslationReaction', 'ComplexFormation'}	protein_b3816
protein_b3821_Outer_Membrane	C1506H2227N390O444S8	None	ProcessedProtein		{}	{}	om	{'PostTranslationReaction', 'ComplexFormation'}	protein_b3821
protein_b3823_Inner_Membrane	C1049H1659N263O255S14	None	ProcessedProtein		{}	{}	im	{'PostTranslationReaction', 'ComplexFormation'}	protein_b3823
protein_b3824_Inner_Membrane	C1046H1676N268O263S7	None	ProcessedProtein		{}	{}	im	{'PostTranslationReaction', 'ComplexFormation'}	protein_b3824
protein_b3835_Inner_Membrane	C2906H4543N771O772S18	None	ProcessedProtein		{}	{}	im	{'PostTranslationReaction', 'ComplexFormation'}	protein_b3835
protein_b3836_Inner_Membrane	C423H695N115O138S2	None	ProcessedProtein		{}	{}	im	{'PostTranslationReaction', 'ComplexFormation'}	protein_b3836
protein_b3838_Inner_Membrane	C811H1311N220O261S3	None	ProcessedProtein		{}	{}	im	{'PostTranslationReaction', 'ComplexFormation'}	protein_b3838
protein_b3839_Inner_Membrane	C1354H2088N311O352S12	None	ProcessedProtein		{}	{}	im	{'PostTranslationReaction', 'ComplexFormation'}	protein_b3839
protein_b3849_Inner_Membrane	C2485H3851N607O631S20	None	ProcessedProtein		{}	{}	im	{'PostTranslationReaction', 'ComplexFormation'}	protein_b3849
protein_b3875_Outer_Membrane	C1238H1810N326O361S5	None	ProcessedProtein		{}	{}	om	{'PostTranslationReaction', 'ComplexFormation'}	protein_b3875
protein_b3892_Inner_Membrane	C1169H1785N299O267S10	None	ProcessedProtein		{}	{}	im	{'PostTranslationReaction', 'ComplexFormation'}	protein_b3892
protein_b3893_Inner_Membrane	C1445H2230N403O448S21	None	ProcessedProtein		{}	{}	im	{'PostTranslationReaction', 'ComplexFormation'}	protein_b3893
protein_b3894_Periplasm	C5040H7728N1373O1478S40Se	None	ProcessedProtein		{}	{}	p	{'PostTranslationReaction', 'ComplexFormation'}	protein_b3894
protein_b3907_Inner_Membrane	C1744H2730N425O432S24	None	ProcessedProtein		{}	{}	im	{'PostTranslationReaction', 'ComplexFormation'}	protein_b3907
protein_b3909_Inner_Membrane	C1557H2520N377O417S15	None	ProcessedProtein		{}	{}	im	{'PostTranslationReaction', 'ComplexFormation'}	protein_b3909
protein_b3915_Inner_Membrane	C1483H2356N401O419S13	None	ProcessedProtein		{}	{}	im	{'PostTranslationReaction', 'ComplexFormation'}	protein_b3915
protein_b3917_Periplasm	C1650H2562N448O495S2	None	ProcessedProtein		{}	{}	p	{'PostTranslationReaction', 'ComplexFormation'}	protein_b3917
protein_b3927_Inner_Membrane	C1388H2134N339O364S12	None	ProcessedProtein		{}	{}	im	{'PostTranslationReaction', 'ComplexFormation'}	protein_b3927
protein_b3930_Inner_Membrane	C1546H2485N402O403S14	None	ProcessedProtein		{}	{}	im	{'PostTranslationReaction', 'ComplexFormation'}	protein_b3930
protein_b3966_Outer_Membrane	C3053H4566N826O964S4	None	ProcessedProtein		{}	{}	om	{'PostTranslationReaction', 'ComplexFormation'}	protein_b3966
protein_b3981_Inner_Membrane	C626H1048N167O163S4	None	ProcessedProtein		{}	{}	im	{'PostTranslationReaction', 'ComplexFormation'}	protein_b3981
protein_b4031_Inner_Membrane	C2491H3843N605O659S25	None	ProcessedProtein		{}	{}	im	{'PostTranslationReaction', 'ComplexFormation'}	protein_b4031
protein_b4032_Inner_Membrane	C1524H2377N365O381S10	None	ProcessedProtein		{}	{}	im	{'PostTranslationReaction', 'ComplexFormation'}	protein_b4032
protein_b4033_Inner_Membrane	C2645H4069N645O719S19	None	ProcessedProtein		{}	{}	im	{'PostTranslationReaction', 'ComplexFormation'}	protein_b4033
protein_b4034_Periplasm	C1972H3070N500O582S9	None	ProcessedProtein		{}	{}	p	{'PostTranslationReaction', 'ComplexFormation'}	protein_b4034
protein_b4036_Outer_Membrane	C2221H3271N601O683S18	None	ProcessedProtein		{}	{}	om	{'PostTranslationReaction', 'ComplexFormation'}	protein_b4036
protein_b4040_Inner_Membrane	C1534H2369N373O377S14	None	ProcessedProtein		{}	{}	im	{'PostTranslationReaction', 'ComplexFormation'}	protein_b4040
protein_b4042_Inner_Membrane	C600H961N156O162S5	None	ProcessedProtein		{}	{}	im	{'PostTranslationReaction', 'ComplexFormation'}	protein_b4042
protein_b4055_Periplasm	C1166H1815N322O348S6	None	ProcessedProtein		{}	{}	p	{'PostTranslationReaction', 'ComplexFormation'}	protein_b4055
protein_b4067_Inner_Membrane	C2762H4304N683O708S25	None	ProcessedProtein		{}	{}	im	{'PostTranslationReaction', 'ComplexFormation'}	protein_b4067
protein_b4070_Periplasm	C2377H3693N672O705S23	None	ProcessedProtein		{}	{}	p	{'PostTranslationReaction', 'ComplexFormation'}	protein_b4070
protein_b4071_Periplasm	C885H1405N267O276S16	None	ProcessedProtein		{}	{}	p	{'PostTranslationReaction', 'ComplexFormation'}	protein_b4071
protein_b4072_Periplasm	C1075H1724N309O312S19	None	ProcessedProtein		{}	{}	p	{'PostTranslationReaction', 'ComplexFormation'}	protein_b4072
protein_b4073_Inner_Membrane	C1676H2609N400O394S12	None	ProcessedProtein		{}	{}	im	{'PostTranslationReaction', 'ComplexFormation'}	protein_b4073
protein_b4077_Inner_Membrane	C2199H3524N531O582S14	None	ProcessedProtein		{}	{}	im	{'PostTranslationReaction', 'ComplexFormation'}	protein_b4077
protein_b4086_Inner_Membrane	C1610H2530N385O420S10	None	ProcessedProtein		{}	{}	im	{'PostTranslationReaction', 'ComplexFormation'}	protein_b4086
protein_b4088_Periplasm	C1464H2369N388O447S11	None	ProcessedProtein		{}	{}	p	{'PostTranslationReaction', 'ComplexFormation'}	protein_b4088
protein_b4111_Inner_Membrane	C2541H3991N627O674S23	None	ProcessedProtein		{}	{}	im	{'PostTranslationReaction', 'ComplexFormation'}	protein_b4111
protein_b4115_Inner_Membrane	C2183H3415N527O567S23	None	ProcessedProtein		{}	{}	im	{'PostTranslationReaction', 'ComplexFormation'}	protein_b4115
protein_b4120_Inner_Membrane	C2478H3813N583O631S20	None	ProcessedProtein		{}	{}	im	{'PostTranslationReaction', 'ComplexFormation'}	protein_b4120
protein_b4123_Inner_Membrane	C2237H3548N536O582S21	None	ProcessedProtein		{}	{}	im	{'PostTranslationReaction', 'ComplexFormation'}	protein_b4123
protein_b4130_Inner_Membrane	C2460H3807N614O638S27	None	ProcessedProtein		{}	{}	im	{'PostTranslationReaction', 'ComplexFormation'}	protein_b4130
protein_b4132_Inner_Membrane	C2143H3351N530O577S28	None	ProcessedProtein		{}	{}	im	{'PostTranslationReaction', 'ComplexFormation'}	protein_b4132
protein_b4136_Inner_Membrane	C2842H4425N723O773S22	None	ProcessedProtein		{}	{}	im	{'PostTranslationReaction', 'ComplexFormation'}	protein_b4136
protein_b4138_Inner_Membrane	C2120H3418N508O568S20	None	ProcessedProtein		{}	{}	im	{'PostTranslationReaction', 'ComplexFormation'}	protein_b4138
protein_b4151_Inner_Membrane	C626H972N151O142S7	None	ProcessedProtein		{}	{}	im	{'PostTranslationReaction', 'ComplexFormation'}	protein_b4151
protein_b4152_Inner_Membrane	C725H1118N167O170S4	None	ProcessedProtein		{}	{}	im	{'PostTranslationReaction', 'ComplexFormation'}	protein_b4152
protein_b4169_Periplasm	C2099H3396N619O652S8	None	ProcessedProtein		{}	{}	p	{'PostTranslationReaction', 'ComplexFormation'}	protein_b4169
protein_b4193_Inner_Membrane	C2363H3665N559O609S34	None	ProcessedProtein		{}	{}	im	{'PostTranslationReaction', 'ComplexFormation'}	protein_b4193
protein_b4208_Inner_Membrane	C2433H3761N572O611S27	None	ProcessedProtein		{}	{}	im	{'PostTranslationReaction', 'ComplexFormation'}	protein_b4208
protein_b4213_Periplasm	C3166H4928N842O966S18	None	ProcessedProtein		{}	{}	p	{'PostTranslationReaction', 'ComplexFormation'}	protein_b4213
protein_b4227_Periplasm	C1520H2476N405O467S14	None	ProcessedProtein		{}	{}	p	{'PostTranslationReaction', 'ComplexFormation'}	protein_b4227
protein_b4230_Inner_Membrane	C1643H2717N420O429S14	None	ProcessedProtein		{}	{}	im	{'PostTranslationReaction', 'ComplexFormation'}	protein_b4230
protein_b4231_Inner_Membrane	C1628H2598N396O428S13	None	ProcessedProtein		{}	{}	im	{'PostTranslationReaction', 'ComplexFormation'}	protein_b4231
protein_b4240_Inner_Membrane	C2358H3753N598O615S24	None	ProcessedProtein		{}	{}	im	{'PostTranslationReaction', 'ComplexFormation'}	protein_b4240
protein_b4242_Inner_Membrane	C4483H7116N1189O1283S39	None	ProcessedProtein		{}	{}	im	{'PostTranslationReaction', 'ComplexFormation'}	protein_b4242
protein_b4261_Inner_Membrane	C1836H2963N484O500S17	None	ProcessedProtein		{}	{}	im	{'PostTranslationReaction', 'ComplexFormation'}	protein_b4261
protein_b4262_Inner_Membrane	C1814H2873N458O495S19	None	ProcessedProtein		{}	{}	im	{'PostTranslationReaction', 'ComplexFormation'}	protein_b4262
protein_b4265_Inner_Membrane	C2154H3441N516O554S19	None	ProcessedProtein		{}	{}	im	{'PostTranslationReaction', 'ComplexFormation'}	protein_b4265
protein_b4288_Inner_Membrane	C1590H2584N406O386S18	None	ProcessedProtein		{}	{}	im	{'PostTranslationReaction', 'ComplexFormation'}	protein_b4288
protein_b4289_Inner_Membrane	C1614H2605N421O411S13	None	ProcessedProtein		{}	{}	im	{'PostTranslationReaction', 'ComplexFormation'}	protein_b4289
protein_b4290_Periplasm	C1490H2387N418O421S8	None	ProcessedProtein		{}	{}	p	{'PostTranslationReaction', 'ComplexFormation'}	protein_b4290
protein_b4291_Outer_Membrane	C3777H5751N1059O1177S15	None	ProcessedProtein		{}	{}	om	{'PostTranslationReaction', 'ComplexFormation'}	protein_b4291
protein_b4311_Outer_Membrane	C1253H1866N345O371S6	None	ProcessedProtein		{}	{}	om	{'PostTranslationReaction', 'ComplexFormation'}	protein_b4311
protein_b4321_Inner_Membrane	C2197H3539N523O566S25	None	ProcessedProtein		{}	{}	im	{'PostTranslationReaction', 'ComplexFormation'}	protein_b4321
protein_b4356_Inner_Membrane	C2260H3550N582O595S33	None	ProcessedProtein		{}	{}	im	{'PostTranslationReaction', 'ComplexFormation'}	protein_b4356
protein_b4392_Periplasm	C3253H5073N920O966S26	None	ProcessedProtein		{}	{}	p	{'PostTranslationReaction', 'ComplexFormation'}	protein_b4392
protein_b0463_lipoprotein_Inner_Membrane	C1897H3128N527O598P0S5	None	ProcessedProtein		{}	{}	im	{'PostTranslationReaction', 'ComplexFormation'}	protein_b0463_Inner_Membrane
protein_b3265_lipoprotein_Inner_Membrane	C1869H3045N511O583P0S5	None	ProcessedProtein		{}	{}	im	{'PostTranslationReaction', 'ComplexFormation'}	protein_b3265_Inner_Membrane
protein_b2512_lipoprotein_Outer_Membrane	C1909H3029N504O589P0S8	None	ProcessedProtein		{}	{}	om	{'PostTranslationReaction', 'ComplexFormation'}	protein_b2512_Outer_Membrane
protein_b2477_lipoprotein_Outer_Membrane	C1662H2675N455O521P0S10	None	ProcessedProtein		{}	{}	om	{'PostTranslationReaction', 'ComplexFormation'}	protein_b2477_Outer_Membrane
protein_b2595_lipoprotein_Outer_Membrane	C1288H2017N342O379P0S10	None	ProcessedProtein		{}	{}	om	{'PostTranslationReaction', 'ComplexFormation'}	protein_b2595_Outer_Membrane
protein_b2617_lipoprotein_Outer_Membrane	C595H970N150O171P0S6	None	ProcessedProtein		{}	{}	om	{'PostTranslationReaction', 'ComplexFormation'}	protein_b2617_Outer_Membrane
protein_b0572_lipoprotein_Outer_Membrane	C2264H3617N631O695P0S10	None	ProcessedProtein		{}	{}	om	{'PostTranslationReaction', 'ComplexFormation'}	protein_b0572_Outer_Membrane
protein_b1677_lipoprotein_Outer_Membrane	C404H709N108O123P0S4	None	ProcessedProtein		{}	{}	om	{'PostTranslationReaction', 'SummaryVariable'}	protein_b1677_Outer_Membrane
protein_b1193_lipoprotein_Outer_Membrane	C1048H1683N275O293P0S8	None	ProcessedProtein		{}	{}	om	{'PostTranslationReaction', 'ComplexFormation'}	protein_b1193_Outer_Membrane
protein_b1209_lipoprotein_Outer_Membrane	C1103H1755N292O317P0S7	None	ProcessedProtein		{}	{}	om	{'PostTranslationReaction', 'ComplexFormation'}	protein_b1209_Outer_Membrane
protein_b0197_lipoprotein_Inner_Membrane	C1384H2224N344O408P0S2	None	ProcessedProtein		{}	{}	im	{'PostTranslationReaction', 'ComplexFormation'}	protein_b0197_Inner_Membrane
protein_b2813_lipoprotein_Outer_Membrane	C1863H2872N509O530P0S12	None	ProcessedProtein		{}	{}	om	{'PostTranslationReaction', 'ComplexFormation'}	protein_b2813_Outer_Membrane
protein_b2701_lipoprotein_Outer_Membrane	C1872H2887N496O524P0S12	None	ProcessedProtein		{}	{}	om	{'PostTranslationReaction', 'ComplexFormation'}	protein_b2701_Outer_Membrane
protein_b2963_lipoprotein_Outer_Membrane	C1835H2926N499O542P0S10	None	ProcessedProtein		{}	{}	om	{'PostTranslationReaction', 'ComplexFormation'}	protein_b2963_Outer_Membrane

## Sheet: GenerictRNA
id	formula	charge	met_type	name	notes	annotation	compartment	reaction_involvement
generic_tRNA_AUC_ile__L_c	None	None	GenerictRNA		{}	{}	c	{'tRNAChargingReaction', 'TranslationReaction'}
generic_tRNA_AUU_ile__L_c	None	None	GenerictRNA		{}	{}	c	{'tRNAChargingReaction', 'TranslationReaction'}
generic_tRNA_GCA_ala__L_c	None	None	GenerictRNA		{}	{}	c	{'tRNAChargingReaction', 'TranslationReaction'}
generic_tRNA_GCG_ala__L_c	None	None	GenerictRNA		{}	{}	c	{'tRNAChargingReaction', 'TranslationReaction'}
generic_tRNA_GCU_ala__L_c	None	None	GenerictRNA		{}	{}	c	{'tRNAChargingReaction', 'TranslationReaction'}
generic_tRNA_GAC_asp__L_c	None	None	GenerictRNA		{}	{}	c	{'tRNAChargingReaction', 'TranslationReaction'}
generic_tRNA_GAU_asp__L_c	None	None	GenerictRNA		{}	{}	c	{'tRNAChargingReaction', 'TranslationReaction'}
generic_tRNA_ACG_thr__L_c	None	None	GenerictRNA		{}	{}	c	{'tRNAChargingReaction', 'TranslationReaction'}
generic_tRNA_AGA_arg__L_c	None	None	GenerictRNA		{}	{}	c	{'tRNAChargingReaction', 'TranslationReaction'}
generic_tRNA_CAA_gln__L_c	None	None	GenerictRNA		{}	{}	c	{'tRNAChargingReaction', 'TranslationReaction'}
generic_tRNA_AUG_met__L_c	None	None	GenerictRNA		{}	{}	c	{'tRNAChargingReaction', 'TranslationReaction'}
generic_tRNA_CAG_gln__L_c	None	None	GenerictRNA		{}	{}	c	{'tRNAChargingReaction', 'TranslationReaction'}
generic_tRNA_CUG_leu__L_c	None	None	GenerictRNA		{}	{}	c	{'tRNAChargingReaction', 'TranslationReaction'}
generic_tRNA_CUA_leu__L_c	None	None	GenerictRNA		{}	{}	c	{'tRNAChargingReaction', 'TranslationReaction'}
generic_tRNA_AAA_lys__L_c	None	None	GenerictRNA		{}	{}	c	{'tRNAChargingReaction', 'TranslationReaction'}
generic_tRNA_AAG_lys__L_c	None	None	GenerictRNA		{}	{}	c	{'tRNAChargingReaction', 'TranslationReaction'}
generic_tRNA_GUA_val__L_c	None	None	GenerictRNA		{}	{}	c	{'tRNAChargingReaction', 'TranslationReaction'}
generic_tRNA_GUG_val__L_c	None	None	GenerictRNA		{}	{}	c	{'tRNAChargingReaction', 'TranslationReaction'}
generic_tRNA_GUU_val__L_c	None	None	GenerictRNA		{}	{}	c	{'tRNAChargingReaction', 'TranslationReaction'}
generic_tRNA_UCC_ser__L_c	None	None	GenerictRNA		{}	{}	c	{'tRNAChargingReaction', 'TranslationReaction'}
generic_tRNA_UCU_ser__L_c	None	None	GenerictRNA		{}	{}	c	{'tRNAChargingReaction', 'TranslationReaction'}
generic_tRNA_UCA_ser__L_c	None	None	GenerictRNA		{}	{}	c	{'tRNAChargingReaction', 'TranslationReaction'}
generic_tRNA_UCG_ser__L_c	None	None	GenerictRNA		{}	{}	c	{'tRNAChargingReaction', 'TranslationReaction'}
generic_tRNA_UAC_tyr__L_c	None	None	GenerictRNA		{}	{}	c	{'tRNAChargingReaction', 'TranslationReaction'}
generic_tRNA_UAU_tyr__L_c	None	None	GenerictRNA		{}	{}	c	{'tRNAChargingReaction', 'TranslationReaction'}
generic_tRNA_GUC_val__L_c	None	None	GenerictRNA		{}	{}	c	{'tRNAChargingReaction', 'TranslationReaction'}
generic_tRNA_UUG_leu__L_c	None	None	GenerictRNA		{}	{}	c	{'tRNAChargingReaction', 'TranslationReaction'}
generic_tRNA_UUA_leu__L_c	None	None	GenerictRNA		{}	{}	c	{'tRNAChargingReaction', 'TranslationReaction'}
generic_tRNA_UGC_cys__L_c	None	None	GenerictRNA		{}	{}	c	{'tRNAChargingReaction', 'TranslationReaction'}
generic_tRNA_UGU_cys__L_c	None	None	GenerictRNA		{}	{}	c	{'tRNAChargingReaction', 'TranslationReaction'}
generic_tRNA_GGC_gly_c	None	None	GenerictRNA		{}	{}	c	{'tRNAChargingReaction', 'TranslationReaction'}
generic_tRNA_GGU_gly_c	None	None	GenerictRNA		{}	{}	c	{'tRNAChargingReaction', 'TranslationReaction'}
generic_tRNA_AAC_asn__L_c	None	None	GenerictRNA		{}	{}	c	{'tRNAChargingReaction', 'TranslationReaction'}
generic_tRNA_AAU_asn__L_c	None	None	GenerictRNA		{}	{}	c	{'tRNAChargingReaction', 'TranslationReaction'}
generic_tRNA_CCC_pro__L_c	None	None	GenerictRNA		{}	{}	c	{'tRNAChargingReaction', 'TranslationReaction'}
generic_tRNA_CCU_pro__L_c	None	None	GenerictRNA		{}	{}	c	{'tRNAChargingReaction', 'TranslationReaction'}
generic_tRNA_AGG_arg__L_c	None	None	GenerictRNA		{}	{}	c	{'tRNAChargingReaction', 'TranslationReaction'}
generic_tRNA_GCC_ala__L_c	None	None	GenerictRNA		{}	{}	c	{'tRNAChargingReaction', 'TranslationReaction'}
generic_tRNA_GAA_glu__L_c	None	None	GenerictRNA		{}	{}	c	{'tRNAChargingReaction', 'TranslationReaction'}
generic_tRNA_AUA_ile__L_c	None	None	GenerictRNA		{}	{}	c	{'tRNAChargingReaction', 'TranslationReaction'}
generic_tRNA_CGU_arg__L_c	None	None	GenerictRNA		{}	{}	c	{'tRNAChargingReaction', 'TranslationReaction'}
generic_tRNA_CGC_arg__L_c	None	None	GenerictRNA		{}	{}	c	{'tRNAChargingReaction', 'TranslationReaction'}
generic_tRNA_CGA_arg__L_c	None	None	GenerictRNA		{}	{}	c	{'tRNAChargingReaction', 'TranslationReaction'}
generic_tRNA_AGC_ser__L_c	None	None	GenerictRNA		{}	{}	c	{'tRNAChargingReaction', 'TranslationReaction'}
generic_tRNA_AGU_ser__L_c	None	None	GenerictRNA		{}	{}	c	{'tRNAChargingReaction', 'TranslationReaction'}
generic_tRNA_START_met__L_c	None	None	GenerictRNA		{}	{}	c	{'tRNAChargingReaction', 'TranslationReaction'}
generic_tRNA_GGG_gly_c	None	None	GenerictRNA		{}	{}	c	{'tRNAChargingReaction', 'TranslationReaction'}
generic_tRNA_UUC_phe__L_c	None	None	GenerictRNA		{}	{}	c	{'tRNAChargingReaction', 'TranslationReaction'}
generic_tRNA_UUU_phe__L_c	None	None	GenerictRNA		{}	{}	c	{'tRNAChargingReaction', 'TranslationReaction'}
generic_tRNA_CUC_leu__L_c	None	None	GenerictRNA		{}	{}	c	{'tRNAChargingReaction', 'TranslationReaction'}
generic_tRNA_CUU_leu__L_c	None	None	GenerictRNA		{}	{}	c	{'tRNAChargingReaction', 'TranslationReaction'}
generic_tRNA_ACC_thr__L_c	None	None	GenerictRNA		{}	{}	c	{'tRNAChargingReaction', 'TranslationReaction'}
generic_tRNA_ACU_thr__L_c	None	None	GenerictRNA		{}	{}	c	{'tRNAChargingReaction', 'TranslationReaction'}
generic_tRNA_CCG_pro__L_c	None	None	GenerictRNA		{}	{}	c	{'tRNAChargingReaction', 'TranslationReaction'}
generic_tRNA_UGA_cys__L_c	None	None	GenerictRNA		{}	{}	c	{'tRNAChargingReaction', 'TranslationReaction'}
generic_tRNA_UGG_trp__L_c	None	None	GenerictRNA		{}	{}	c	{'tRNAChargingReaction', 'TranslationReaction'}
generic_tRNA_CGG_arg__L_c	None	None	GenerictRNA		{}	{}	c	{'tRNAChargingReaction', 'TranslationReaction'}
generic_tRNA_CAC_his__L_c	None	None	GenerictRNA		{}	{}	c	{'tRNAChargingReaction', 'TranslationReaction'}
generic_tRNA_CAU_his__L_c	None	None	GenerictRNA		{}	{}	c	{'tRNAChargingReaction', 'TranslationReaction'}
generic_tRNA_CCA_pro__L_c	None	None	GenerictRNA		{}	{}	c	{'tRNAChargingReaction', 'TranslationReaction'}
generic_tRNA_ACA_thr__L_c	None	None	GenerictRNA		{}	{}	c	{'tRNAChargingReaction', 'TranslationReaction'}
generic_tRNA_GGA_gly_c	None	None	GenerictRNA		{}	{}	c	{'tRNAChargingReaction', 'TranslationReaction'}

## Sheet: Constraint
id	formula	charge	met_type	name	notes	annotation	compartment	reaction_involvement
biomass	None	None	Constraint		{}	{}	mc	{'SummaryVariable'}
protein_biomass	None	None	Constraint		{}	{}	mc	{'SummaryVariable', 'TranslationReaction'}
mRNA_biomass	None	None	Constraint		{}	{}	mc	{'TranscriptionReaction', 'SummaryVariable', 'TranslationReaction', 'MEReaction'}
tRNA_biomass	None	None	Constraint		{}	{}	mc	{'TranscriptionReaction', 'SummaryVariable', 'MEReaction'}
rRNA_biomass	None	None	Constraint		{}	{}	mc	{'TranscriptionReaction', 'SummaryVariable', 'MEReaction'}
ncRNA_biomass	None	None	Constraint		{}	{}	mc	{'TranscriptionReaction', 'SummaryVariable', 'MEReaction'}
DNA_biomass	None	None	Constraint		{}	{}	mc	{'SummaryVariable'}
lipid_biomass	None	None	Constraint		{}	{}	mc	{'PostTranslationReaction', 'SummaryVariable'}
constituent_biomass	None	None	Constraint		{}	{}	mc	{'SummaryVariable'}
prosthetic_group_biomass	None	None	Constraint		{}	{}	mc	{'ComplexFormation', 'SummaryVariable'}
peptidoglycan_biomass	None	None	Constraint		{}	{}	mc	{'SummaryVariable'}
unmodeled_protein_biomass	None	None	Constraint		{}	{}	mc	{'SummaryVariable'}

## Sheet: Complex
id	formula	charge	met_type	name	notes	annotation	compartment	reaction_involvement
CPLX0-7817_mod_Oxidized	C1152H1798N296O348S12	None	Complex		{}	{}	c	{'tRNAChargingReaction', 'MetabolicReaction'}
CPLX0-7817	C1152H1800N296O348S12	None	Complex		{}	{}	c	{'tRNAChargingReaction', 'ComplexFormation', 'MetabolicReaction'}
GLUTAREDOXIN-MONOMER_mod_Oxidized	C429H657N116O134S3	None	Complex		{}	{}	c	{'MetabolicReaction'}
GLUTAREDOXIN-MONOMER	C429H659N116O134S3	None	Complex		{}	{}	c	{'ComplexFormation', 'MetabolicReaction'}
GRXC-MONOMER_mod_Oxidized	C394H634N112O121S4	None	Complex		{}	{}	c	{'MetabolicReaction'}
GRXC-MONOMER	C394H636N112O121S4	None	Complex		{}	{}	c	{'ComplexFormation', 'MetabolicReaction'}
GRXB-MONOMER	C1093H1748N294O316S9	None	Complex		{}	{}	c	{'ComplexFormation', 'MetabolicReaction'}
GRXB-MONOMER_mod_Oxidized	C1093H1746N294O316S9	None	Complex		{}	{}	c	{'MetabolicReaction'}
EG50003-MONOMER_mod_pan4p_mod_3ha	C383H600N95O143PS2	None	Complex		{}	{}	c	{'MetabolicReaction'}
EG50003-MONOMER_mod_pan4p_mod_act	C383H598N95O143PS2	None	Complex		{}	{}	c	{'MetabolicReaction'}
EG50003-MONOMER_mod_pan4p_mod_ddca	C391H616N95O142PS2	None	Complex		{}	{}	c	{'MetabolicReaction'}
EG50003-MONOMER_mod_pan4p	C379H594N95O141PS2	None	Complex		{}	{}	c	{'ComplexFormation', 'MetabolicReaction'}
EG50003-MONOMER_mod_pan4p_mod_mal	C382H595N95O144PS2	None	Complex		{}	{}	c	{'MetabolicReaction'}
EG50003-MONOMER_mod_pan4p_mod_3omrs	C393H618N95O143PS2	None	Complex		{}	{}	c	{'MetabolicReaction'}
EG50003-MONOMER_mod_pan4p_mod_pim	C386H604N95O144PS2	None	Complex		{}	{}	c	{'MetabolicReaction'}
CPLX0-1341_mod_1:2fe2s_mod_2:fe2	C6928Fe4H10822N1918O2141S47	None	Complex		{}	{}	c	{'MetabolicReaction'}
CPLX0-1341_mod_1:2fe2s_mod_1:fe2	C6928Fe3H10822N1918O2141S47	None	Complex		{}	{}	c	{'MetabolicReaction'}
EG50003-MONOMER_mod_pan4p_mod_opme	C387H604N95O145PS2	None	Complex		{}	{}	c	{'MetabolicReaction'}
EG50003-MONOMER_mod_pan4p_mod_gme	C385H602N95O144PS2	None	Complex		{}	{}	c	{'MetabolicReaction'}
EG50003-MONOMER_mod_pan4p_mod_t3c7mrse	C393H616N95O142PS2	None	Complex		{}	{}	c	{'MetabolicReaction'}
EG50003-MONOMER_mod_pan4p_mod_3hcmrs7e	C393H618N95O143PS2	None	Complex		{}	{}	c	{'MetabolicReaction'}
IscU	C1202H1914N326O398S12	None	Complex		{}	{}	c	{'ComplexFormation', 'MetabolicReaction'}
IscA_tetra	C2040H3172N540O644S20	None	Complex		{}	{}	c	{'ComplexFormation', 'MetabolicReaction', 'MEReaction'}
IscA_tetra_mod_1:2fe2s	C2040Fe2H3172N540O644S22	None	Complex		{}	{}	c	{'GenericFormationReaction', 'MetabolicReaction', 'MEReaction'}
IscU_mod_1:2fe2s	C1202Fe2H1914N326O398S14	None	Complex		{}	{}	c	{'MetabolicReaction'}
EG50003-MONOMER_mod_pan4p_mod_3ocpalm9e	C395H620N95O143PS2	None	Complex		{}	{}	c	{'MetabolicReaction'}
EG50003-MONOMER_mod_pan4p_mod_3hcpalm9e	C395H622N95O143PS2	None	Complex		{}	{}	c	{'MetabolicReaction'}
EG50003-MONOMER_mod_pan4p_mod_octe	C397H626N95O142PS2	None	Complex		{}	{}	c	{'MetabolicReaction'}
IscU_mod_2:fe2	C1202Fe2H1914N326O398S12	None	Complex		{}	{}	c	{'MetabolicReaction'}
EG11653-MONOMER	C539H797N146O175S3	None	Complex		{}	{}	c	{'ComplexFormation', 'MetabolicReaction'}
IscU_mod_1:fe2	C1202FeH1914N326O398S12	None	Complex		{}	{}	c	{'MetabolicReaction'}
EG11653-MONOMER_mod_1:fe2	C539FeH797N146O175S3	None	Complex		{}	{}	c	{'MetabolicReaction'}
EG50003-MONOMER_mod_pan4p_mod_3ooct	C387H606N95O143PS2	None	Complex		{}	{}	c	{'MetabolicReaction'}
EG50003-MONOMER_mod_pan4p_mod_hex	C385H604N95O142PS2	None	Complex		{}	{}	c	{'MetabolicReaction'}
EG50003-MONOMER_mod_pan4p_mod_tddec2e	C391H614N95O142PS2	None	Complex		{}	{}	c	{'MetabolicReaction'}
EG50003-MONOMER_mod_pan4p_mod_3hmrs	C393H620N95O143PS2	None	Complex		{}	{}	c	{'MetabolicReaction'}
EG50003-MONOMER_mod_pan4p_mod_thex2e	C385H602N95O142PS2	None	Complex		{}	{}	c	{'MetabolicReaction'}
EG50003-MONOMER_mod_pan4p_mod_3hhex	C385H604N95O143PS2	None	Complex		{}	{}	c	{'MetabolicReaction'}
EG50003-MONOMER_mod_pan4p_mod_t3c9palme	C395H620N95O142PS2	None	Complex		{}	{}	c	{'MetabolicReaction'}
EG50003-MONOMER_mod_pan4p_mod_tde	C393H618N95O142PS2	None	Complex		{}	{}	c	{'MetabolicReaction'}
IscU_mod_1:2fe2s_mod_1:fe2	C1202Fe3H1914N326O398S14	None	Complex		{}	{}	c	{'MetabolicReaction'}
IscU_mod_1:2fe2s_mod_2:fe2	C1202Fe4H1914N326O398S14	None	Complex		{}	{}	c	{'MetabolicReaction'}
RED-THIOREDOXIN-MONOMER_mod_Oxidized	C528H831N132O159S3	None	Complex		{}	{}	c	{'tRNAChargingReaction', 'MetabolicReaction'}
RED-THIOREDOXIN-MONOMER	C528H833N132O159S3	None	Complex		{}	{}	c	{'tRNAChargingReaction', 'ComplexFormation', 'MetabolicReaction'}
DSBD-MONOMER	C2842H4425N723O773S22	None	Complex		{}	{}	im	{'ComplexFormation', 'MetabolicReaction'}
DSBD-MONOMER_mod_Oxidized	C2842H4423N723O773S22	None	Complex		{}	{}	im	{'MetabolicReaction'}
RED-THIOREDOXIN2-MONOMER	C685H1071N191O205S9	None	Complex		{}	{}	c	{'ComplexFormation', 'MetabolicReaction'}
RED-THIOREDOXIN2-MONOMER_mod_Oxidized	C685H1069N191O205S9	None	Complex		{}	{}	c	{'MetabolicReaction'}
EG50003-MONOMER_mod_pan4p_mod_hpme	C387H606N95O145PS2	None	Complex		{}	{}	c	{'MetabolicReaction'}
EG50003-MONOMER_mod_pan4p_mod_pme	C387H606N95O144PS2	None	Complex		{}	{}	c	{'MetabolicReaction'}
EG50003-MONOMER_mod_pan4p_mod_epme	C387H604N95O144PS2	None	Complex		{}	{}	c	{'MetabolicReaction'}
EG50003-MONOMER_mod_pan4p_mod_tpalm2e	C395H622N95O142PS2	None	Complex		{}	{}	c	{'MetabolicReaction'}
EG50003-MONOMER_mod_pan4p_mod_palm	C395H624N95O142PS2	None	Complex		{}	{}	c	{'MetabolicReaction'}
CPLX0-246_CPLX0-1342_mod_pydx5p	C5376H8450N1491O1572PS48	None	Complex		{}	{}	c	{'ComplexFormation', 'MetabolicReaction'}
CPLX0-246_CPLX0-1342_mod_pydx5p_mod_1:SH	C5376H8450N1491O1572PS49	None	Complex		{}	{}	c	{'MetabolicReaction'}
EG50003-MONOMER_mod_pan4p_mod_oc	C387H608N95O142PS2	None	Complex		{}	{}	c	{'MetabolicReaction'}
CPLX0-1341_mod_1:2fe1s	C6928Fe2H10822N1918O2141S46	None	Complex		{}	{}	c	{'MetabolicReaction'}
CPLX0-1341_mod_1:2fe2s	C6928Fe2H10822N1918O2141S47	None	Complex		{}	{}	c	{'MetabolicReaction'}
EG50003-MONOMER_mod_pan4p_mod_3hpalm	C395H624N95O143PS2	None	Complex		{}	{}	c	{'MetabolicReaction'}
EG50003-MONOMER_mod_pan4p_mod_ocdca	C397H628N95O142PS2	None	Complex		{}	{}	c	{'MetabolicReaction'}
CPLX0-1341_mod_1:4fe4s	C6928Fe4H10822N1918O2141S49	None	Complex		{}	{}	c	{'MetabolicReaction'}
CPLX0-1341_mod_2:2fe2s	C6928Fe4H10822N1918O2141S49	None	Complex		{}	{}	c	{'MetabolicReaction'}
DISULFOXRED-MONOMER_mod_Oxidized	C1047H1619N266O305S9	None	Complex		{}	{}	c	{'MetabolicReaction'}
DISULFOXRED-MONOMER	C1047H1621N266O305S9	None	Complex		{}	{}	c	{'ComplexFormation', 'MetabolicReaction'}
CPLX0-7617	C1056H1626N270O356S12	None	Complex		{}	{}	c	{'ComplexFormation', 'MetabolicReaction', 'MEReaction'}
CPLX0-7617_mod_1:4fe4s	C1056Fe4H1626N270O356S16	None	Complex		{}	{}	c	{'GenericFormationReaction', 'MetabolicReaction', 'MEReaction'}
IscU_mod_1:4fe4s	C1202Fe4H1914N326O398S16	None	Complex		{}	{}	c	{'MetabolicReaction'}
EG50003-MONOMER_mod_pan4p_mod_hde	C395H622N95O142PS2	None	Complex		{}	{}	c	{'MetabolicReaction'}
EG50003-MONOMER_mod_pan4p_mod_cdec3e	C389H610N95O142PS2	None	Complex		{}	{}	c	{'MetabolicReaction'}
EG50003-MONOMER_mod_pan4p_mod_3ocddec5e	C391H612N95O143PS2	None	Complex		{}	{}	c	{'MetabolicReaction'}
IscU_mod_1:2fe2s_mod_1:2fe1s	C1202Fe4H1914N326O398S15	None	Complex		{}	{}	c	{'MetabolicReaction'}
IscS_mod_2:pydx5p	C3980H6334N1130O1210P2S38	None	Complex		{}	{}	c	{'tRNAChargingReaction', 'ComplexFormation', 'MetabolicReaction'}
IscS_mod_2:pydx5p_mod_1:SH	C3980H6334N1130O1210P2S39	None	Complex		{}	{}	c	{'tRNAChargingReaction', 'MetabolicReaction'}
FLAVODOXIN1-MONOMER	C881H1300N220O280S4	None	Complex		{}	{}	c	{'ComplexFormation', 'MetabolicReaction'}
FLAVODOXIN1-MONOMER_mod_Oxidized	C881H1300N220O280S4	None	Complex		{}	{}	c	{'ComplexFormation', 'MetabolicReaction'}
FLAVODOXIN2-MONOMER_mod_Oxidized	C893H1317N212O275S8	None	Complex		{}	{}	c	{'MetabolicReaction'}
FLAVODOXIN2-MONOMER	C893H1317N212O275S8	None	Complex		{}	{}	c	{'ComplexFormation', 'MetabolicReaction'}
EG50003-MONOMER_mod_pan4p_mod_dca	C389H612N95O142PS2	None	Complex		{}	{}	c	{'MetabolicReaction'}
EG50003-MONOMER_mod_pan4p_mod_tdec2e	C389H610N95O142PS2	None	Complex		{}	{}	c	{'MetabolicReaction'}
EG11597-MONOMER	C395H606N102O119S2	None	Complex		{}	{}	c	{'ComplexFormation', 'MetabolicReaction'}
EG11597-MONOMER_mod_amp	C405H618N107O125PS2	None	Complex		{}	{}	c	{'MetabolicReaction'}
EG50003-MONOMER_mod_pan4p_mod_egme	C385H600N95O144PS2	None	Complex		{}	{}	c	{'MetabolicReaction'}
EG50003-MONOMER_mod_pan4p_mod_hgme	C385H602N95O145PS2	None	Complex		{}	{}	c	{'MetabolicReaction'}
EG50003-MONOMER_mod_pan4p_mod_ogme	C385H600N95O145PS2	None	Complex		{}	{}	c	{'MetabolicReaction'}
IscU_mod_1:2fe1s	C1202Fe2H1914N326O398S13	None	Complex		{}	{}	c	{'MetabolicReaction'}
EG50003-MONOMER_mod_pan4p_mod_3oddec	C391H614N95O143PS2	None	Complex		{}	{}	c	{'MetabolicReaction'}
EG50003-MONOMER_mod_pan4p_mod_tmrs2e	C393H618N95O142PS2	None	Complex		{}	{}	c	{'MetabolicReaction'}
IscU_mod_2:2fe2s	C1202Fe4H1914N326O398S16	None	Complex		{}	{}	c	{'MetabolicReaction'}
EG11597-MONOMER_mod_cosh	C395H607N102O118S3	None	Complex		{}	{}	c	{'MetabolicReaction'}
DSBG-CPLX_mod_Oxidized	C2490H3950N634O716S24	None	Complex		{}	{}	p	{'MetabolicReaction'}
DSBG-CPLX	C2490H3952N634O716S24	None	Complex		{}	{}	p	{'ComplexFormation', 'MetabolicReaction'}
EG50003-MONOMER_mod_pan4p_mod_toct2e	C387H606N95O142PS2	None	Complex		{}	{}	c	{'MetabolicReaction'}
IscA_tetra_mod_1:4fe4s	C2040Fe4H3172N540O644S24	None	Complex		{}	{}	c	{'GenericFormationReaction', 'MetabolicReaction', 'MEReaction'}
CPLX0-1341	C6928H10822N1918O2141S45	None	Complex		{}	{}	c	{'ComplexFormation', 'MetabolicReaction'}
DSBC-CPLX	C2278H3622N592O682S32	None	Complex		{}	{}	p	{'ComplexFormation', 'MetabolicReaction'}
DSBC-CPLX_mod_Oxidized	C2278H3620N592O682S32	None	Complex		{}	{}	p	{'MetabolicReaction'}
EG50003-MONOMER_mod_pan4p_mod_ac	C381H596N95O142PS2	None	Complex		{}	{}	c	{'MetabolicReaction'}
EG50003-MONOMER_mod_pan4p_mod_cddec5e	C391H614N95O142PS2	None	Complex		{}	{}	c	{'MetabolicReaction'}
EG50003-MONOMER_mod_pan4p_mod_t3c5ddece	C391H612N95O142PS2	None	Complex		{}	{}	c	{'MetabolicReaction'}
CPLX0-1341_mod_1:2fe2s_mod_1:2fe1s	C6928Fe4H10822N1918O2141S48	None	Complex		{}	{}	c	{'MetabolicReaction'}
EG50003-MONOMER_mod_pan4p_mod_3ocmrs7e	C393H616N95O143PS2	None	Complex		{}	{}	c	{'MetabolicReaction'}
CPLX0-1341_mod_2:fe2	C6928Fe2H10822N1918O2141S45	None	Complex		{}	{}	c	{'MetabolicReaction'}
CPLX0-1341_mod_1:fe2	C6928FeH10822N1918O2141S45	None	Complex		{}	{}	c	{'MetabolicReaction'}
EG50003-MONOMER_mod_pan4p_mod_3odec	C389H610N95O143PS2	None	Complex		{}	{}	c	{'MetabolicReaction'}
EG50003-MONOMER_mod_pan4p_mod_myrs	C393H620N95O142PS2	None	Complex		{}	{}	c	{'MetabolicReaction'}
CPLX0-7824	C1190H1802N314O352S14	None	Complex		{}	{}	c	{'ComplexFormation', 'MetabolicReaction', 'MEReaction'}
CPLX0-7824_mod_1:4fe4s	C1190Fe4H1802N314O352S18	None	Complex		{}	{}	c	{'GenericFormationReaction', 'MetabolicReaction', 'MEReaction'}
EG50003-MONOMER_mod_pan4p_mod_3hoct	C387H608N95O143PS2	None	Complex		{}	{}	c	{'MetabolicReaction'}
EG50003-MONOMER_mod_pan4p_mod_3ohex	C385H602N95O143PS2	None	Complex		{}	{}	c	{'MetabolicReaction'}
EG50003-MONOMER_mod_pan4p_mod_but	C383H600N95O142PS2	None	Complex		{}	{}	c	{'MetabolicReaction'}
EG50003-MONOMER_mod_pan4p_mod_3hddec	C391H616N95O143PS2	None	Complex		{}	{}	c	{'MetabolicReaction'}
EG50003-MONOMER_mod_pan4p_mod_3hcddec5e	C391H614N95O143PS2	None	Complex		{}	{}	c	{'MetabolicReaction'}
EG50003-MONOMER_mod_pan4p_mod_toctd2e	C397H626N95O142PS2	None	Complex		{}	{}	c	{'MetabolicReaction'}
EG50003-MONOMER_mod_pan4p_mod_but2e	C383H598N95O142PS2	None	Complex		{}	{}	c	{'MetabolicReaction'}
EG50003-MONOMER_mod_pan4p_mod_3ooctd	C397H626N95O143PS2	None	Complex		{}	{}	c	{'MetabolicReaction'}
EG50003-MONOMER_mod_pan4p_mod_3opalm	C395H622N95O143PS2	None	Complex		{}	{}	c	{'MetabolicReaction'}
CPLX0-7617_mod_1:2fe2s	C1056Fe2H1626N270O356S14	None	Complex		{}	{}	c	{'GenericFormationReaction', 'MetabolicReaction', 'MEReaction'}
CPLX0-7824_mod_1:2fe2s	C1190Fe2H1802N314O352S16	None	Complex		{}	{}	c	{'GenericFormationReaction', 'MetabolicReaction', 'MEReaction'}
EG50003-MONOMER_mod_pan4p_mod_3hdec	C389H612N95O143PS2	None	Complex		{}	{}	c	{'MetabolicReaction'}
EG50003-MONOMER_mod_pan4p_mod_t3c11vace	C397H624N95O142PS2	None	Complex		{}	{}	c	{'MetabolicReaction'}
EG50003-MONOMER_mod_pan4p_mod_3hocta	C397H628N95O143PS2	None	Complex		{}	{}	c	{'MetabolicReaction'}
EG50003-MONOMER	C368H574N93O135S	None	Complex		{}	{}	c	{'ComplexFormation', 'MetabolicReaction'}
EG50003-MONOMER_mod_pan4p_mod_3hcvac11e	C397H626N95O143PS2	None	Complex		{}	{}	c	{'MetabolicReaction'}
EG50003-MONOMER_mod_pan4p_mod_3ocvac11e	C397H624N95O143PS2	None	Complex		{}	{}	c	{'MetabolicReaction'}
EG50003-MONOMER_mod_pan4p_mod_lipo	C387H606N95O142PS4	None	Complex		{}	{}	c	{'ComplexFormation', 'MetabolicReaction'}
CPLX0-782_mod_2:4fe4s	C3164Fe8H5090N920O920S52	None	Complex		{}	{}	c	{'ComplexFormation', 'MetabolicReaction'}
CPLX0-782_mod_1:2fe2s_mod_1:4fe4s	C3164Fe6H5090N920O920S50	None	Complex		{}	{}	c	{'MetabolicReaction'}
YmfC_mono	C1103H1771N328O321S4	None	Complex		{}	{}	c	{'ComplexFormation'}
CARNRACE-MONOMER	C1259H1971N339O373S7	None	Complex		{}	{}	c	{'ComplexFormation', 'MetabolicReaction'}
CPLX0-1601	C10347H16210N2877O3038S106	None	Complex		{}	{}	m	{'ComplexFormation', 'MetabolicReaction'}
NANE-MONOMER	C1053H1717N294O328S10	None	Complex		{}	{}	c	{'ComplexFormation', 'MetabolicReaction'}
NARU-MONOMER	C2344H3627N577O586S20	None	Complex		{}	{}	im	{'ComplexFormation', 'MetabolicReaction'}
YDGEF-CPLX	C1179H1880N279O289S8	None	Complex		{}	{}	im	{'ComplexFormation', 'MetabolicReaction'}
PHOSMANMUT-MONOMER	C2244H3529N623O667S17	None	Complex		{}	{}	c	{'ComplexFormation', 'MetabolicReaction'}
CPLX0-3929	C5928H9736N1684O1800S68	None	Complex		{}	{}	c	{'ComplexFormation', 'MetabolicReaction'}
CPLX0-7652	C8396H13008N2360O2496S56	None	Complex		{}	{}	c	{'ComplexFormation', 'MetabolicReaction'}
ANSB-CPLX	C6492H10376N1756O2068S40	None	Complex		{}	{}	p	{'ComplexFormation', 'MetabolicReaction'}
EG11983-MONOMER	C1706H2634N442O498S14	None	Complex		{}	{}	c	{'ComplexFormation', 'MetabolicReaction'}
NARW-MONOMER	C1161H1807N309O362S8	None	Complex		{}	{}	c	{'ComplexFormation'}
EG11009-MONOMER	C2334H3731N671O772S6	None	Complex		{}	{}	om	{'ComplexFormation', 'MetabolicReaction'}
DIHYDROOROTOX-MONOMER	C1642H2654N452O481S11	None	Complex		{}	{}	c	{'ComplexFormation', 'MetabolicReaction'}
NAPD-MONOMER	C408H644N110O142S3	None	Complex		{}	{}	c	{'ComplexFormation'}
YGFO-MONOMER	C2250H3613N558O616S24	None	Complex		{}	{}	im	{'ComplexFormation', 'MetabolicReaction'}
ALTRO-OXIDOREDUCT-MONOMER	C2479H3821N662O725S9	None	Complex		{}	{}	c	{'ComplexFormation', 'MetabolicReaction'}
EG10739-MONOMER	C1748H2671N516O482S11	None	Complex		{}	{}	c	{'ComplexFormation', 'MetabolicReaction'}
DCUA-MONOMER	C2120H3418N508O568S20	None	Complex		{}	{}	im	{'ComplexFormation', 'MetabolicReaction'}
KUP-MONOMER	C3216H5064N810O833S28	None	Complex		{}	{}	im	{'ComplexFormation', 'MetabolicReaction'}
PHOSNACMURPENTATRANS-MONOMER	C1893H2937N459O455S15	None	Complex		{}	{}	im	{'ComplexFormation', 'MetabolicReaction'}
RplY_mono	C479H781N137O134S3	None	Complex		{}	{}	c	{'ComplexFormation'}
CPLX0-1262	C6176H10068N1740O1812S96	None	Complex		{}	{}	c	{'ComplexFormation', 'MetabolicReaction'}
YJGT-MONOMER	C2154H3441N516O554S19	None	Complex		{}	{}	im	{'ComplexFormation', 'MetabolicReaction'}
CPLX0-1541	C2158H3458N584O658S18	None	Complex		{}	{}	c	{'ComplexFormation', 'MetabolicReaction'}
DCUB-MONOMER	C2237H3548N536O582S21	None	Complex		{}	{}	im	{'ComplexFormation', 'MetabolicReaction'}
G6406-MONOMER	C2142H3340N619O595S11	None	Complex		{}	{}	p	{'ComplexFormation', 'MetabolicReaction'}
G7533-MONOMER	C1835H2926N499O542P0S10	None	Complex		{}	{}	om	{'ComplexFormation', 'MetabolicReaction'}
CPLX0-7794	C5460H8892N1528O1640S76	None	Complex		{}	{}	c	{'ComplexFormation', 'MetabolicReaction'}
G6580-MONOMER	C786H1191N209O225S8	None	Complex		{}	{}	c	{'ComplexFormation', 'MetabolicReaction'}
PABASYN-COMPI-MONOMER	C2265H3510N626O687S14	None	Complex		{}	{}	c	{'ComplexFormation', 'MetabolicReaction'}
KDPGALDOL-4OH2OXOGLUTARALDOL-CPLX	C3018H4899N780O879S21	None	Complex		{}	{}	c	{'ComplexFormation', 'MetabolicReaction'}
G495-MONOMER	C2509H3727N650O720S26	None	Complex		{}	{}	c	{'ComplexFormation', 'MetabolicReaction'}
RlmG_mono	C1888H2982N527O553S13	None	Complex		{}	{}	c	{'ComplexFormation'}
CPLX0-7458	C6048H9682N1729O1791S62	None	Complex		{}	{}	c	{'ComplexFormation', 'MetabolicReaction'}
YDEA-MONOMER	C1996H3180N485O498S19	None	Complex		{}	{}	im	{'ComplexFormation', 'MetabolicReaction'}
EG11486-MONOMER	C2110H3348N520O533S14	None	Complex		{}	{}	im	{'ComplexFormation', 'MetabolicReaction'}
FADA-CPLX	C3546H5752N1038O1064S56	None	Complex		{}	{}	c	{'ComplexFormation', 'MetabolicReaction'}
G6718-MONOMER	C1828H3005N550O559S20	None	Complex		{}	{}	c	{'ComplexFormation', 'MetabolicReaction'}
RpmB_mono	C388H655N129O106S2	None	Complex		{}	{}	c	{'ComplexFormation'}
EG10202-MONOMER	C2300H3656N643O680S19	None	Complex		{}	{}	p	{'ComplexFormation', 'MetabolicReaction'}
G6275-MONOMER	C814H1244N221O242S5	None	Complex		{}	{}	c	{'ComplexFormation', 'MetabolicReaction'}
ABC-3-CPLX	C6196H9877N1642O1761S40	None	Complex		{}	{}	m	{'ComplexFormation', 'MetabolicReaction'}
EG11956-MONOMER	C1493H2353N428O430S20	None	Complex		{}	{}	c	{'ComplexFormation', 'MetabolicReaction'}
B0511-MONOMER	C2468H3806N590O630S20	None	Complex		{}	{}	im	{'ComplexFormation', 'MetabolicReaction'}
TNAB-MONOMER	C2155H3293N497O536S15	None	Complex		{}	{}	im	{'ComplexFormation', 'MetabolicReaction'}
EG10950-MONOMER	C3253H5073N920O966S26	None	Complex		{}	{}	p	{'ComplexFormation', 'MetabolicReaction'}
RsmI_mono	C1394H2246N394O416S5	None	Complex		{}	{}	c	{'GenericFormationReaction', 'ComplexFormation'}
CPLX0-241	C3455H5408N960O1036S29	None	Complex		{}	{}	c	{'ComplexFormation', 'MetabolicReaction'}
2-OCTAPRENYLPHENOL-HYDROX-MONOMER	C2906H4543N771O772S18	None	Complex		{}	{}	im	{'ComplexFormation', 'MetabolicReaction'}
RpsP_mono	C406H667N128O114S	None	Complex		{}	{}	c	{'ComplexFormation'}
G7419-MONOMER	C1025H1625N286O311S9	None	Complex		{}	{}	c	{'ComplexFormation', 'MetabolicReaction'}
ARAE-MONOMER	C2358H3772N601O631S33	None	Complex		{}	{}	im	{'ComplexFormation', 'MetabolicReaction'}
PHOSGLUCOSAMINEMUT-MONOMER	C2084H3366N592O632S18	None	Complex		{}	{}	c	{'ComplexFormation', 'MetabolicReaction'}
EG10381-MONOMER	C3310H4954N930O950S18	None	Complex		{}	{}	c	{'ComplexFormation', 'MetabolicReaction'}
CPLX0-7659	C3552H5706N1040O1042S32	None	Complex		{}	{}	c	{'ComplexFormation', 'MetabolicReaction'}
AICARTRANSIMPCYCLO-CPLX	C2516H4001N710O774S23	None	Complex		{}	{}	c	{'ComplexFormation', 'MetabolicReaction'}
EG11910-MONOMER_dimer	C7654H12004N2112O2292S50	None	Complex		{}	{}	c	{'ComplexFormation'}
FRUCBISALD-CLASSI	C16740H26380N4690O5140S130	None	Complex		{}	{}	c	{'ComplexFormation', 'MetabolicReaction'}
TYRP-MONOMER	C2009H3168N490O508S16	None	Complex		{}	{}	im	{'ComplexFormation', 'MetabolicReaction'}
CPLX-167	C12265H19546N3211O3612S96	None	Complex		{}	{}	im	{'ComplexFormation', 'MetabolicReaction'}
ERYTH4PDEHYDROG-CPLX	C6576H10420N1912O1960S32	None	Complex		{}	{}	c	{'ComplexFormation', 'MetabolicReaction'}
MTR-MONOMER	C2089H3238N496O533S16	None	Complex		{}	{}	im	{'ComplexFormation', 'MetabolicReaction'}
ABC-70-CPLX	C8259H12958N2231O2305S38	None	Complex		{}	{}	m	{'ComplexFormation', 'MetabolicReaction'}
OCTAPRENYL-METHOXYPHENOL-OH-MONOMER	C1853H2955N556O545S17	None	Complex		{}	{}	c	{'ComplexFormation', 'MetabolicReaction'}
CPLX0-3181	C2650H4230N736O804S16	None	Complex		{}	{}	c	{'ComplexFormation', 'MetabolicReaction'}
YJDL-MONOMER	C2460H3807N614O638S27	None	Complex		{}	{}	im	{'ComplexFormation', 'MetabolicReaction'}
DusA_mono	C1624H2547N460O480S19	None	Complex		{}	{}	c	{'GenericFormationReaction', 'ComplexFormation'}
RpsF_mono	C657H1027N194O207S7	None	Complex		{}	{}	c	{'ComplexFormation'}
CPLX0-7688	C9208H14592N2532O2760S60	None	Complex		{}	{}	c	{'ComplexFormation', 'MetabolicReaction'}
EG11829-MONOMER_EG11828-MONOMER	C1819H2885N508O530S16	None	Complex		{}	{}	c	{'ComplexFormation', 'MetabolicReaction'}
EG11288-MONOMER	C1421H2247N413O437S12	None	Complex		{}	{}	c	{'ComplexFormation', 'MetabolicReaction'}
GKI-MONOMER	C1706H2744N478O545S13	None	Complex		{}	{}	c	{'ComplexFormation', 'MetabolicReaction'}
CPLX0-7654	C5552H8536N1356O1456S48	None	Complex		{}	{}	im	{'ComplexFormation', 'MetabolicReaction'}
ARGSUCCTRAN-MONOMER	C1712H2672N476O503S15	None	Complex		{}	{}	c	{'ComplexFormation', 'MetabolicReaction'}
EXUT-MONOMER	C2399H3669N597O615S27	None	Complex		{}	{}	im	{'ComplexFormation', 'MetabolicReaction'}
ABC-51-CPLX	C8186H12789N2136O2266S65	None	Complex		{}	{}	m	{'ComplexFormation', 'MetabolicReaction'}
EG10780-MONOMER	C515H828N140O148S4	None	Complex		{}	{}	p	{'ComplexFormation', 'MetabolicReaction'}
TRANSALDOLB-CPLX	C3126H5000N840O960S14	None	Complex		{}	{}	c	{'ComplexFormation', 'MetabolicReaction'}
GLYCOGENSYN-MONOMER	C2401H3680N652O670S13	None	Complex		{}	{}	c	{'ComplexFormation', 'MetabolicReaction'}
ACNEULY-CPLX	C5816H9224N1548O1732S40	None	Complex		{}	{}	c	{'ComplexFormation', 'MetabolicReaction'}
CPLX0-3861	C11056H17104N2952O3264S176	None	Complex		{}	{}	c	{'ComplexFormation', 'MetabolicReaction'}
G7732-MONOMER	C1968H3089N555O598S14	None	Complex		{}	{}	c	{'ComplexFormation', 'MetabolicReaction'}
RpoH_mono	C1423H2259N414O434S11	None	Complex		{}	{}	c	{'ComplexFormation'}
GPT-CPLX	C3056H4808N828O872S24	None	Complex		{}	{}	c	{'ComplexFormation', 'MetabolicReaction'}
BRNQ-MONOMER	C2158H3394N526O564S15	None	Complex		{}	{}	im	{'ComplexFormation', 'MetabolicReaction'}
G7322-MONOMER_G6561-MONOMER	C6425H10176N1726O1708S45	None	Complex		{}	{}	im	{'ComplexFormation', 'MetabolicReaction'}
GLUTAMIDOTRANS-CPLX	C2233H3497N608O662S20	None	Complex		{}	{}	c	{'ComplexFormation', 'MetabolicReaction'}
ABC-7-CPLX	C8302H13030N2239O2315S41	None	Complex		{}	{}	m	{'ComplexFormation', 'MetabolicReaction'}
PNUC-MONOMER	C1275H1961N300O316S14	None	Complex		{}	{}	im	{'ComplexFormation', 'MetabolicReaction'}
TREHALAPERI-MONOMER	C2844H4346N771O853S20	None	Complex		{}	{}	p	{'ComplexFormation', 'MetabolicReaction'}
EG11911-MONOMER	C1423H2315N410O416S19	None	Complex		{}	{}	c	{'ComplexFormation'}
PrfB_mono	C1783H2797N507O596S11	None	Complex		{}	{}	c	{'GenericFormationReaction', 'ComplexFormation', 'TranslationReaction'}
UDPMANNACADEHYDROG-MONOMER	C2040H3241N558O604S18	None	Complex		{}	{}	c	{'ComplexFormation', 'MetabolicReaction'}
ANTHRANSYNCOMPII-MONOMER	C2511H3991N714O750S17	None	Complex		{}	{}	c	{'ComplexFormation', 'MetabolicReaction'}
CPLX0-7614	C2908H4806N832O884S36	None	Complex		{}	{}	c	{'ComplexFormation', 'MetabolicReaction'}
B2789-MONOMER	C2305H3531N560O583S23	None	Complex		{}	{}	im	{'ComplexFormation', 'MetabolicReaction'}
EG11353-MONOMER	C1788H2802N459O496S12	None	Complex		{}	{}	c	{'ComplexFormation', 'MetabolicReaction'}
KEFB-MONOMER	C3024H4818N797O821S29	None	Complex		{}	{}	im	{'ComplexFormation', 'MetabolicReaction'}
YHHO-MONOMER	C3402H5581N951O1020S22	None	Complex		{}	{}	im	{'ComplexFormation', 'MetabolicReaction'}
G6862-MONOMER	C1174H1860N334O336S10	None	Complex		{}	{}	c	{'ComplexFormation', 'MetabolicReaction'}
CPLX0-1941	C6642H10465N1846O2042S36	None	Complex		{}	{}	m	{'ComplexFormation', 'MetabolicReaction'}
GALACTONATE-DEHYDRATASE-MONOMER	C1931H2979N508O547S14	None	Complex		{}	{}	c	{'ComplexFormation', 'MetabolicReaction'}
XAPB-MONOMER	C2167H3303N505O549S29	None	Complex		{}	{}	im	{'ComplexFormation', 'MetabolicReaction'}
PGLUCONDEHYDRAT-MONOMER	C2837H4528N809O854S31	None	Complex		{}	{}	c	{'ComplexFormation', 'MetabolicReaction'}
G6712-MONOMER	C813H1257N221O236S13	None	Complex		{}	{}	c	{'ComplexFormation'}
CPLX0-235	C3134H4962N870O940S28	None	Complex		{}	{}	c	{'ComplexFormation', 'MetabolicReaction'}
ADENODEAMIN-MONOMER	C1610H2550N460O482S10	None	Complex		{}	{}	c	{'ComplexFormation', 'MetabolicReaction'}
PROPKIN-MONOMER	C1900H3003N545O586S16	None	Complex		{}	{}	c	{'ComplexFormation', 'MetabolicReaction'}
GARTRANSFORMYL2-MONOMER	C1872H3000N530O559S13	None	Complex		{}	{}	c	{'ComplexFormation', 'MetabolicReaction'}
NusA_mono	C2396H3836N669O775S13	None	Complex		{}	{}	c	{'TranscriptionReaction', 'ComplexFormation'}
NusB_mono	C705H1130N191O207S3	None	Complex		{}	{}	c	{'TranscriptionReaction', 'ComplexFormation'}
EG11437-MONOMER	C1689H2806N480O500S12	None	Complex		{}	{}	c	{'ComplexFormation', 'MetabolicReaction'}
EG12455-MONOMER	C1935H3072N482O500S18	None	Complex		{}	{}	im	{'ComplexFormation', 'MetabolicReaction'}
CADB-MONOMER	C2143H3351N530O577S28	None	Complex		{}	{}	im	{'ComplexFormation', 'MetabolicReaction'}
CPLX0-7534	C5265H7875N1398O1671S15	None	Complex		{}	{}	om	{'ComplexFormation', 'MetabolicReaction'}
EG12221-MONOMER	C976H1508N269O283S7	None	Complex		{}	{}	c	{'ComplexFormation', 'MetabolicReaction'}
InfA_mono	C356H589N103O107S3	None	Complex		{}	{}	c	{'ComplexFormation', 'TranslationReaction'}
EG11082-MONOMER	C1452H2310N393O421S17	None	Complex		{}	{}	c	{'ComplexFormation', 'MetabolicReaction'}
TRKA-MONOMER_SAPD-MONOMER_TRKG-MONOMER	C6423H10164N1721O1789S58	None	Complex		{}	{}	im	{'ComplexFormation', 'MetabolicReaction'}
FADB-CPLX	C7164H11364N1908O2080S52	None	Complex		{}	{}	c	{'ComplexFormation', 'MetabolicReaction'}
MELB-MONOMER	C2478H3813N583O631S20	None	Complex		{}	{}	im	{'ComplexFormation', 'MetabolicReaction'}
CPLX-63	C5736H8905N1586O1724S49	None	Complex		{}	{}	m	{'ComplexFormation', 'MetabolicReaction'}
RluC_mono	C1590H2623N483O457S7	None	Complex		{}	{}	c	{'ComplexFormation'}
EG11425-MONOMER	C1234H2002N347O345S8	None	Complex		{}	{}	c	{'ComplexFormation', 'MetabolicReaction'}
DIHYDRODIPICSYN-CPLX	C5492H8904N1536O1676S56	None	Complex		{}	{}	c	{'ComplexFormation', 'MetabolicReaction'}
EG10280-MONOMER	C2177H3232N582O672S7	None	Complex		{}	{}	om	{'ComplexFormation', 'MetabolicReaction'}
EIISGA	C11965H19005N3078O3485S126	None	Complex		{}	{}	im	{'ComplexFormation', 'MetabolicReaction'}
HCAT-MONOMER	C1964H3042N485O472S19	None	Complex		{}	{}	im	{'ComplexFormation', 'MetabolicReaction'}
PHOSACETYLTRANS-CPLX	C20244H32886N5682O6354S144	None	Complex		{}	{}	c	{'ComplexFormation', 'MetabolicReaction'}
RsmD_mono	C957H1522N277O288S5	None	Complex		{}	{}	c	{'ComplexFormation'}
G6714-MONOMER	C1193H1968N346O362S9	None	Complex		{}	{}	c	{'ComplexFormation', 'MetabolicReaction'}
RpsI_mono	C642H1084N208O183S3	None	Complex		{}	{}	c	{'ComplexFormation'}
EG11158-MONOMER	C960H1486N259O262S8	None	Complex		{}	{}	c	{'ComplexFormation', 'MetabolicReaction'}
3-OXOACYL-ACP-SYNTHII-CPLX	C3756H5956N1056O1176S34	None	Complex		{}	{}	c	{'ComplexFormation', 'MetabolicReaction'}
EG11511-MONOMER	C937H1515N256O289S7	None	Complex		{}	{}	c	{'ComplexFormation', 'MetabolicReaction'}
TREHALACYTO-MONOMER	C2867H4308N773O843S18	None	Complex		{}	{}	c	{'ComplexFormation', 'MetabolicReaction'}
Era_dim	C2998H4846N836O882S20	None	Complex		{}	{}	c	{'ComplexFormation'}
TRE6PHYDRO-MONOMER	C2874H4265N790O829S21	None	Complex		{}	{}	c	{'ComplexFormation', 'MetabolicReaction'}
GSP-CPLX	C6358H9682N1700O1862S40	None	Complex		{}	{}	c	{'ComplexFormation', 'MetabolicReaction'}
TrmH_dim	C2206H3540N652O658S30	None	Complex		{}	{}	c	{'tRNAChargingReaction', 'ComplexFormation'}
EG10119-MONOMER	C1263H1966N374O354S7	None	Complex		{}	{}	c	{'ComplexFormation', 'MetabolicReaction'}
RrmJ_mono	C1037H1676N290O299S11	None	Complex		{}	{}	c	{'ComplexFormation'}
ORNCARBAMTRANSFERF-CPLX	C4875H7659N1320O1473S54	None	Complex		{}	{}	c	{'ComplexFormation', 'MetabolicReaction'}
DusC_mono	C1566H2499N443O455S12	None	Complex		{}	{}	c	{'GenericFormationReaction', 'ComplexFormation'}
GLU6PDEHYDROG-MONOMER	C2479H3892N683O741S18	None	Complex		{}	{}	c	{'ComplexFormation', 'MetabolicReaction'}
G6176-MONOMER_G6177-MONOMER_G6178-MONOMER	C4576H7362N1309O1366S53	None	Complex		{}	{}	c	{'ComplexFormation', 'MetabolicReaction'}
N-ACETYLGLUTPREDUCT-MONOMER	C1624H2520N429O473S10	None	Complex		{}	{}	c	{'ComplexFormation', 'MetabolicReaction'}
DALADEHYDROGA-MONOMER	C2112H3312N593O624S19	None	Complex		{}	{}	c	{'ComplexFormation', 'MetabolicReaction'}
PDXK-CPLX	C5516H8836N1472O1668S28	None	Complex		{}	{}	c	{'ComplexFormation', 'MetabolicReaction'}
DHHB-METHYLTRANSFER-CPLX	C2372H3710N654O688S22	None	Complex		{}	{}	c	{'ComplexFormation', 'MetabolicReaction'}
CORA-MONOMER	C1649H2535N434O486S11	None	Complex		{}	{}	im	{'ComplexFormation', 'MetabolicReaction'}
PUTA-CPLX	C12714H20336N3606O3832S80	None	Complex		{}	{}	c	{'ComplexFormation', 'MetabolicReaction'}
FORMYLTHFDEFORMYL-CPLX	C8538H13536N2436O2448S66	None	Complex		{}	{}	c	{'ComplexFormation', 'MetabolicReaction'}
EG11665-MONOMER	C1396H2188N335O347S17	None	Complex		{}	{}	im	{'ComplexFormation', 'MetabolicReaction'}
EG11423-MONOMER	C1924H2998N487O529S10	None	Complex		{}	{}	c	{'ComplexFormation', 'MetabolicReaction'}
RIB5PISOMB-CPLX	C1418H2258N414O420S10	None	Complex		{}	{}	c	{'ComplexFormation', 'MetabolicReaction'}
G6260-MONOMER	C3867H6285N1077O1179S31	None	Complex		{}	{}	im	{'ComplexFormation', 'MetabolicReaction'}
EG12713-MONOMER	C1490H2300N352O376S12	None	Complex		{}	{}	im	{'ComplexFormation', 'MetabolicReaction'}
CPLX0-321	C9104H14856N2696O2800S96	None	Complex		{}	{}	c	{'ComplexFormation', 'MetabolicReaction'}
PHENDEHYD-CPLX	C4762H7504N1320O1436S36	None	Complex		{}	{}	c	{'ComplexFormation', 'MetabolicReaction'}
CPLX0-3932	C9309H14875N2541O2854P0S55	None	Complex		{}	{}	m	{'ComplexFormation', 'MetabolicReaction'}
CYNX-MONOMER	C1932H3059N491O471S21	None	Complex		{}	{}	im	{'ComplexFormation', 'MetabolicReaction'}
KDOTRANS-MONOMER	C2150H3451N600O584S8	None	Complex		{}	{}	c	{'ComplexFormation', 'MetabolicReaction'}
CHD-MONOMER	C2722H4171N778O823S28	None	Complex		{}	{}	c	{'ComplexFormation', 'MetabolicReaction'}
AROP-MONOMER	C2330H3614N561O590S24	None	Complex		{}	{}	im	{'ComplexFormation', 'MetabolicReaction'}
G6661-MONOMER	C1528H2471N420O464S16	None	Complex		{}	{}	c	{'ComplexFormation', 'MetabolicReaction'}
TRKA-MONOMER_SAPD-MONOMER_TRKH-MONOMER	C6369H10132N1728O1772S54	None	Complex		{}	{}	im	{'ComplexFormation', 'MetabolicReaction'}
YJCG-MONOMER	C2762H4304N683O708S25	None	Complex		{}	{}	im	{'ComplexFormation', 'MetabolicReaction'}
DEOXYRIBOSE-P-ALD-MONOMER	C1223H1978N334O378S10	None	Complex		{}	{}	c	{'ComplexFormation', 'MetabolicReaction'}
MGTA-MONOMER	C4483H7116N1189O1283S39	None	Complex		{}	{}	im	{'ComplexFormation', 'MetabolicReaction'}
GLYCEROL-3-P-ACYLTRANSFER-MONOMER	C4087H6487N1143O1164S31	None	Complex		{}	{}	c	{'ComplexFormation', 'MetabolicReaction'}
TrmD_dim	C2512H3956N716O750S20	None	Complex		{}	{}	c	{'tRNAChargingReaction', 'ComplexFormation'}
RELA-MONOMER	C3702H5883N1076O1098S26	None	Complex		{}	{}	c	{'ComplexFormation', 'MetabolicReaction'}
UXAC-MONOMER	C2403H3671N666O707S24	None	Complex		{}	{}	c	{'ComplexFormation', 'MetabolicReaction'}
CPLX0-7685	C3564H5752N952O1084S36	None	Complex		{}	{}	c	{'ComplexFormation', 'MetabolicReaction'}
6PGLUCONOLACT-MONOMER	C1608H2450N445O495S11	None	Complex		{}	{}	c	{'ComplexFormation', 'MetabolicReaction'}
PrfC_mono	C2637H4165N727O792S22	None	Complex		{}	{}	c	{'ComplexFormation', 'TranslationReaction'}
EG11340-MONOMER	C1389H2261N398O371S13	None	Complex		{}	{}	c	{'ComplexFormation', 'MetabolicReaction'}
TruD_mono	C1743H2743N499O509S8	None	Complex		{}	{}	c	{'tRNAChargingReaction', 'ComplexFormation'}
MONOMER0-149	C1319H2112N351O397S6	None	Complex		{}	{}	c	{'ComplexFormation', 'MetabolicReaction'}
KGTP-MONOMER	C2165H3389N547O572S26	None	Complex		{}	{}	im	{'ComplexFormation', 'MetabolicReaction'}
YecO_mono	C1230H1914N341O367S13	None	Complex		{}	{}	c	{'tRNAChargingReaction', 'ComplexFormation'}
DLACTDEHYDROGNAD-MONOMER	C1625H2554N433O491S16	None	Complex		{}	{}	c	{'ComplexFormation', 'MetabolicReaction'}
FOLC-MONOMER	C2023H3195N560O607S10	None	Complex		{}	{}	c	{'ComplexFormation', 'MetabolicReaction'}
SUCCCOASYN	C6310H10212N1714O1902S48	None	Complex		{}	{}	c	{'ComplexFormation', 'MetabolicReaction'}
DCUC-MONOMER	C2236H3613N532O596S29	None	Complex		{}	{}	im	{'ComplexFormation', 'MetabolicReaction'}
EG12285-MONOMER	C1032H1645N300O308S8	None	Complex		{}	{}	c	{'ComplexFormation', 'MetabolicReaction'}
YHIP-MONOMER	C2533H3906N585O629S30	None	Complex		{}	{}	im	{'ComplexFormation', 'MetabolicReaction'}
RplQ_mono	C621H1046N204O178S5	None	Complex		{}	{}	c	{'ComplexFormation'}
LYXK-CPLX	C4912H7564N1360O1434S52	None	Complex		{}	{}	c	{'ComplexFormation', 'MetabolicReaction'}
B1634-MONOMER	C2507H3923N605O656S30	None	Complex		{}	{}	im	{'ComplexFormation', 'MetabolicReaction'}
RpsJ_mono	C514H866N158O151S2	None	Complex		{}	{}	c	{'TranscriptionReaction', 'ComplexFormation'}
RpsD_mono	C1026H1710N315O298S4	None	Complex		{}	{}	c	{'TranscriptionReaction', 'ComplexFormation'}
EG11373-MONOMER	C2631H4073N686O789S11	None	Complex		{}	{}	p	{'ComplexFormation', 'MetabolicReaction'}
NANK-MONOMER	C1299H2111N376O399S8	None	Complex		{}	{}	c	{'ComplexFormation', 'MetabolicReaction'}
SUCCGLUDESUCC-MONOMER	C1615H2512N445O453S12	None	Complex		{}	{}	c	{'ComplexFormation', 'MetabolicReaction'}
GroL_14	C34664H57526N9660O11228S350	None	Complex		{}	{}	c	{'ComplexFormation', 'TranslationReaction'}
G7096-MONOMER	C2098H3345N593O612S21	None	Complex		{}	{}	c	{'ComplexFormation', 'MetabolicReaction'}
CPLX0-7687	C4396H6940N1234O1308S44	None	Complex		{}	{}	c	{'ComplexFormation', 'MetabolicReaction'}
G6339-MONOMER	C1394H2241N394O415S15	None	Complex		{}	{}	c	{'ComplexFormation', 'MetabolicReaction'}
LysI_RS_dim	C5104H7966N1414O1538S36	None	Complex		{}	{}	c	{'GenericFormationReaction', 'ComplexFormation'}
RplS_mono	C574H965N179O163S	None	Complex		{}	{}	c	{'ComplexFormation'}
3-ISOPROPYLMALISOM-CPLX	C3195H4990N885O962S28	None	Complex		{}	{}	c	{'ComplexFormation', 'MetabolicReaction'}
G6662-MONOMER	C1180H1813N334O349S9	None	Complex		{}	{}	c	{'ComplexFormation', 'MetabolicReaction'}
DMBPPRIBOSYLTRANS-CPLX	C3242H5336N896O988S40	None	Complex		{}	{}	c	{'ComplexFormation', 'MetabolicReaction'}
MONOMER0-1842	C607H960N174O184S6	None	Complex		{}	{}	c	{'ComplexFormation', 'MetabolicReaction'}
G6539-MONOMER	C1594H2471N445O449S9	None	Complex		{}	{}	c	{'ComplexFormation', 'MetabolicReaction'}
CPLX0-7912	C3194H5164N906O932S30	None	Complex		{}	{}	c	{'ComplexFormation', 'MetabolicReaction'}
DTDPDEHYDRHAMEPIM-MONOMER	C967H1465N258O277S4	None	Complex		{}	{}	c	{'ComplexFormation', 'MetabolicReaction'}
CPLX-722	C4176H6670N1166O1250S28	None	Complex		{}	{}	p	{'ComplexFormation', 'MetabolicReaction'}
G7558-MONOMER	C1721H2708N486O513S13	None	Complex		{}	{}	c	{'ComplexFormation', 'MetabolicReaction'}
YBDA-MONOMER	C2001H3244N504O518S20	None	Complex		{}	{}	im	{'ComplexFormation', 'MetabolicReaction'}
RNase_III_dim	C2248H3620N658O682S10	None	Complex		{}	{}	c	{'ComplexFormation'}
RpmJ_mono	C185H344N65O48S4	None	Complex		{}	{}	c	{'ComplexFormation'}
GLUC1PURIDYLTRANS-MONOMER	C1461H2345N383O438S16	None	Complex		{}	{}	c	{'ComplexFormation', 'MetabolicReaction'}
RpsN_mono	C499H847N164O139S3	None	Complex		{}	{}	c	{'ComplexFormation'}
YFEP-MONOMER	C2046H3281N521O530S17	None	Complex		{}	{}	im	{'ComplexFormation', 'MetabolicReaction'}
PGAM2-MONOMER	C1033H1681N318O326S9	None	Complex		{}	{}	c	{'ComplexFormation', 'MetabolicReaction'}
SORB6PDEHYDROG-CPLX	C4976H7828N1320O1492S44	None	Complex		{}	{}	c	{'ComplexFormation', 'MetabolicReaction'}
NARJ-MONOMER	C1176H1833N323O361S5	None	Complex		{}	{}	c	{'ComplexFormation'}
LUMAZINESYN-CPLX	C43200H70020N11760O13200S120	None	Complex		{}	{}	c	{'ComplexFormation', 'MetabolicReaction'}
G6245-MONOMER	C1130H1771N309O338S13	None	Complex		{}	{}	c	{'ComplexFormation', 'MetabolicReaction'}
NUPG-MONOMER	C2183H3343N504O553S28	None	Complex		{}	{}	im	{'ComplexFormation', 'MetabolicReaction'}
TRYPTOPHAN-CPLX	C9468H14728N2500O2784S92	None	Complex		{}	{}	c	{'ComplexFormation', 'MetabolicReaction'}
G6199-MONOMER	C2406H3764N659O705S19	None	Complex		{}	{}	c	{'ComplexFormation', 'MetabolicReaction'}
UDPNACETYLGLUCOSAMENOLPYRTRANS-MONOMER	C1972H3220N558O597S16	None	Complex		{}	{}	c	{'ComplexFormation', 'MetabolicReaction'}
TufA_mono	C1917H3050N523O581S13	None	Complex		{}	{}	c	{'GenericFormationReaction', 'ComplexFormation'}
CPLX0-242	C1068H1574N286O330S14	None	Complex		{}	{}	c	{'ComplexFormation', 'MetabolicReaction'}
YGJU-MONOMER	C1977H3214N507O539S20	None	Complex		{}	{}	im	{'ComplexFormation', 'MetabolicReaction'}
RHTB-MONOMER	C1046H1676N268O263S7	None	Complex		{}	{}	im	{'ComplexFormation', 'MetabolicReaction'}
OCTAPRENYL-METHYL-METHOXY-BENZOQ-OH-MON	C1930H3015N540O539S17	None	Complex		{}	{}	c	{'ComplexFormation', 'MetabolicReaction'}
Gly_RS_tetra	C9972H15618N2710O2962S62	None	Complex		{}	{}	c	{'tRNAChargingReaction', 'ComplexFormation'}
Tyr_RS_dim	C4236H6590N1152O1268S26	None	Complex		{}	{}	c	{'tRNAChargingReaction', 'ComplexFormation'}
G6719-MONOMER	C2147H3418N617O648S22	None	Complex		{}	{}	c	{'ComplexFormation', 'MetabolicReaction'}
L-GLN-FRUCT-6-P-AMINOTRANS-CPLX	C5906H9430N1662O1792S34	None	Complex		{}	{}	c	{'ComplexFormation', 'MetabolicReaction'}
G7726-MONOMER	C1271H1898N336O380S11	None	Complex		{}	{}	c	{'ComplexFormation', 'MetabolicReaction'}
GLYCDEH-CPLX	C13768H21672N3680O4200S112	None	Complex		{}	{}	c	{'ComplexFormation', 'MetabolicReaction'}
GART-MONOMER	C1036H1608N290O309S5	None	Complex		{}	{}	c	{'ComplexFormation', 'MetabolicReaction'}
Pnp_trim	C10155H16428N2859O3159S66	None	Complex		{}	{}	c	{'ComplexFormation'}
RpsK_mono	C595H997N196O171S3	None	Complex		{}	{}	c	{'ComplexFormation'}
GLTP-MONOMER	C2199H3524N531O582S14	None	Complex		{}	{}	im	{'ComplexFormation', 'MetabolicReaction'}
PFLACTENZ-MONOMER	C1249H1929N345O363S15	None	Complex		{}	{}	c	{'ComplexFormation'}
LAUROYLACYLTRAN-MONOMER	C1608H2540N443O413S23	None	Complex		{}	{}	c	{'ComplexFormation', 'MetabolicReaction'}
CPLX0-7428	C15576H24544N4388O4660S96	None	Complex		{}	{}	c	{'ComplexFormation', 'MetabolicReaction'}
YjbC_mono	C1432H2381N419O423S8	None	Complex		{}	{}	c	{'ComplexFormation'}
EG11167-MONOMER	C1218H1966N297O325S16	None	Complex		{}	{}	im	{'ComplexFormation', 'MetabolicReaction'}
RplT_mono	C604H1022N192O151S0	None	Complex		{}	{}	c	{'ComplexFormation'}
GNTU-MONOMER	C2144H3431N520O556S32	None	Complex		{}	{}	im	{'ComplexFormation', 'MetabolicReaction'}
UROGENIIISYN-MONOMER	C1242H1967N354O355S8	None	Complex		{}	{}	c	{'ComplexFormation', 'MetabolicReaction'}
GLUCOSAMINE-6-P-DEAMIN-CPLX	C7968H12492N2184O2316S84	None	Complex		{}	{}	c	{'ComplexFormation', 'MetabolicReaction'}
EG12013-MONOMER	C3702H5864N1001O1135S28	None	Complex		{}	{}	p	{'ComplexFormation', 'MetabolicReaction'}
RlmI_dim	C3950H6272N1104O1154S32	None	Complex		{}	{}	c	{'ComplexFormation'}
G6286-MONOMER	C1682H2617N466O505S16	None	Complex		{}	{}	c	{'ComplexFormation', 'MetabolicReaction'}
B0752-MONOMER	C1571H2463N438O421S14	None	Complex		{}	{}	im	{'ComplexFormation', 'MetabolicReaction'}
MALATE-SYNTHASE	C2694H4185N737O797S19	None	Complex		{}	{}	c	{'ComplexFormation', 'MetabolicReaction'}
B1006-MONOMER	C2092H3357N525O554S26	None	Complex		{}	{}	im	{'ComplexFormation', 'MetabolicReaction'}
YecP_mono	C1678H2600N456O468S11	None	Complex		{}	{}	c	{'tRNAChargingReaction', 'ComplexFormation'}
GLYOHMETRANS-CPLX	C4042H6322N1098O1210S30	None	Complex		{}	{}	c	{'ComplexFormation', 'MetabolicReaction'}
URPHOS-CPLX	C7122H11436N1986O2196S66	None	Complex		{}	{}	c	{'ComplexFormation', 'MetabolicReaction'}
G6357-MONOMER	C2738H4356N762O848S14	None	Complex		{}	{}	c	{'ComplexFormation', 'MetabolicReaction'}
RIBONUCLEOSIDE-TRIP-REDUCT-CPLX	C7078H11046N2000O2130S56	None	Complex		{}	{}	c	{'ComplexFormation', 'MetabolicReaction'}
EG11424-MONOMER	C2195H3495N530O575S12	None	Complex		{}	{}	im	{'ComplexFormation', 'MetabolicReaction'}
G6358-MONOMER	C1521H2389N396O450S12	None	Complex		{}	{}	c	{'ComplexFormation', 'MetabolicReaction'}
ABC-28-CPLX_EG10817-MONOMER	C5992H9807N1628O1786S47	None	Complex		{}	{}	m	{'ComplexFormation', 'MetabolicReaction'}
SPED-MONOMER	C1354H2092N354O410S15	None	Complex		{}	{}	c	{'ComplexFormation', 'MetabolicReaction'}
ABC-18-CPLX	C9903H15919N2598O2867S75	None	Complex		{}	{}	m	{'ComplexFormation', 'MetabolicReaction'}
EG11426-MONOMER	C1486H2366N396O425S11	None	Complex		{}	{}	c	{'ComplexFormation', 'MetabolicReaction'}
EG12712-MONOMER	C843H1328N239O257S11	None	Complex		{}	{}	c	{'ComplexFormation', 'MetabolicReaction'}
FHLMULTI-CPLX	C13984H22065N3776O3960S160Se	None	Complex		{}	{}	im	{'ComplexFormation', 'MetabolicReaction'}
CPLX0-1666	C3421H5576N969O1000S25	None	Complex		{}	{}	c	{'ComplexFormation', 'MetabolicReaction'}
NRFMULTI-CPLX	C6013H9431N1648O1687S70	None	Complex		{}	{}	m	{'ComplexFormation', 'MetabolicReaction'}
CPLX0-254	C7818H12354N2118O2292S72	None	Complex		{}	{}	c	{'ComplexFormation', 'MetabolicReaction'}
G6439-MONOMER	C1058H1615N264O253S10	None	Complex		{}	{}	im	{'ComplexFormation', 'MetabolicReaction'}
CPLX0-7415	C3792H6092N1050O1068S40	None	Complex		{}	{}	c	{'ComplexFormation', 'MetabolicReaction'}
YhhP_mono	C399H638N108O120S7	None	Complex		{}	{}	c	{'tRNAChargingReaction', 'ComplexFormation'}
OROTPDECARB-CPLX	C2318H3724N652O700S24	None	Complex		{}	{}	c	{'ComplexFormation', 'MetabolicReaction'}
GreA_mono	C772H1241N215O248S4	None	Complex		{}	{}	c	{'TranscriptionReaction', 'ComplexFormation'}
EG12666-MONOMER	C1214H1902N339O331S11	None	Complex		{}	{}	c	{'ComplexFormation', 'MetabolicReaction'}
SIROHEMESYN-CPLX	C4410H7114N1264O1310S34	None	Complex		{}	{}	c	{'ComplexFormation', 'MetabolicReaction'}
URACIL-PRIBOSYLTRANS-CPLX	C3021H4944N789O906S24	None	Complex		{}	{}	c	{'ComplexFormation', 'MetabolicReaction'}
ENTE-CPLX	C5266H8244N1454O1578S32	None	Complex		{}	{}	c	{'ComplexFormation', 'MetabolicReaction'}
FABA-CPLX	C1706H2662N448O478S18	None	Complex		{}	{}	c	{'ComplexFormation', 'MetabolicReaction'}
RpsL_mono	C590H1019N196O165S4	None	Complex		{}	{}	c	{'ComplexFormation'}
RsmG_mono	C1058H1681N288O300S6	None	Complex		{}	{}	c	{'ComplexFormation'}
B0612-MONOMER	C2511H3897N585O626S25	None	Complex		{}	{}	im	{'ComplexFormation', 'MetabolicReaction'}
PHENPRODIOLDEHYDROG-MONOMER	C1266H2006N351O377S10	None	Complex		{}	{}	c	{'ComplexFormation', 'MetabolicReaction'}
1-ACYLGLYCEROL-3-P-ACYLTRANSFER-MONOMER	C1247H1988N343O333S11	None	Complex		{}	{}	c	{'ComplexFormation', 'MetabolicReaction'}
NACGLCTRANS-MONOMER	C1683H2701N488O473S11	None	Complex		{}	{}	c	{'ComplexFormation', 'MetabolicReaction'}
BETT-MONOMER	C3514H5360N872O945S28	None	Complex		{}	{}	im	{'ComplexFormation', 'MetabolicReaction'}
CPLX0-7674	C8428H13276N2124O2380S56	None	Complex		{}	{}	im	{'ComplexFormation', 'MetabolicReaction'}
ABC-49-CPLX	C11809H18791N3243O3316S86	None	Complex		{}	{}	im	{'ComplexFormation', 'MetabolicReaction'}
ABC-15-CPLX	C7842H12482N2059O2199S71	None	Complex		{}	{}	m	{'ComplexFormation', 'MetabolicReaction'}
UHPT-MONOMER	C2357H3649N569O622S22	None	Complex		{}	{}	im	{'ComplexFormation', 'MetabolicReaction'}
EG12384-MONOMER	C1404H2243N386O428S8	None	Complex		{}	{}	c	{'ComplexFormation', 'MetabolicReaction'}
FABZ-CPLX	C774H1224N205O211S8	None	Complex		{}	{}	c	{'ComplexFormation', 'MetabolicReaction'}
CPLX0-7906	C8049H12210N1866O1992S87	None	Complex		{}	{}	im	{'ComplexFormation', 'MetabolicReaction'}
RpsR_mono	C395H651N123O107S	None	Complex		{}	{}	c	{'ComplexFormation'}
PITA-MONOMER	C2427H3914N634O664S25	None	Complex		{}	{}	im	{'ComplexFormation', 'MetabolicReaction'}
RsmB_mono	C2152H3421N612O623S16	None	Complex		{}	{}	c	{'ComplexFormation'}
RpmD_mono	C281H491N87O79S2	None	Complex		{}	{}	c	{'ComplexFormation'}
DSBBPROT-MONOMER	C951H1459N230O226S13	None	Complex		{}	{}	im	{'ComplexFormation', 'MetabolicReaction'}
CPLX0-3976_edit	C4222H6482N1076O1101S34	None	Complex		{}	{}	im	{'ComplexFormation', 'MetabolicReaction'}
RIBULP3EPIM-MONOMER	C1099H1738N292O326S9	None	Complex		{}	{}	c	{'ComplexFormation', 'MetabolicReaction'}
TSA-REDUCT-MONOMER	C1338H2204N360O409S17	None	Complex		{}	{}	c	{'ComplexFormation', 'MetabolicReaction'}
MHPF-MONOMER	C1464H2377N410O450S16	None	Complex		{}	{}	c	{'ComplexFormation', 'MetabolicReaction'}
DIHYDROFOLATEREDUCT-MONOMER	C805H1224N217O239S7	None	Complex		{}	{}	c	{'ComplexFormation', 'MetabolicReaction'}
RplI_mono	C699H1149N197O214S	None	Complex		{}	{}	c	{'ComplexFormation'}
CPLX0-3201	C2678H4252N760O772S26	None	Complex		{}	{}	p	{'ComplexFormation', 'MetabolicReaction'}
RNase_G_dim	C4850H7786N1388O1484S36	None	Complex		{}	{}	c	{'ComplexFormation'}
YRBG-MONOMER	C1610H2627N401O426S10	None	Complex		{}	{}	im	{'ComplexFormation', 'MetabolicReaction'}
B0260-MONOMER	C2373H3645N576O599S22	None	Complex		{}	{}	im	{'ComplexFormation', 'MetabolicReaction'}
EG10153-MONOMER	C1955H3096N539O591S14	None	Complex		{}	{}	c	{'ComplexFormation', 'MetabolicReaction'}
CPLX0-7	C6312H10118N1650O1865S50	None	Complex		{}	{}	im	{'ComplexFormation', 'MetabolicReaction'}
CPLX-169	C6265H10015N1652O1863S49	None	Complex		{}	{}	im	{'ComplexFormation', 'MetabolicReaction'}
RluB_mono	C1423H2358N452O421S6	None	Complex		{}	{}	c	{'ComplexFormation'}
MYRISTOYLACYLTRAN-MONOMER	C1689H2645N479O453S16	None	Complex		{}	{}	im	{'ComplexFormation', 'MetabolicReaction'}
ABC-24-CPLX	C8395H13269N2171O2379S75	None	Complex		{}	{}	m	{'ComplexFormation', 'MetabolicReaction'}
XYLE-MONOMER	C2491H3843N605O659S25	None	Complex		{}	{}	im	{'ComplexFormation', 'MetabolicReaction'}
THIH-MONOMER_THIF-MONOMER_THII-MONOMER_THIS-MONOMER	C5863H9308N1669O1748S44	None	Complex		{}	{}	c	{'ComplexFormation', 'MetabolicReaction'}
TrmU_mono	C1827H2830N489O555S13	None	Complex		{}	{}	c	{'tRNAChargingReaction', 'ComplexFormation'}
PGK-CPLX	C1828H2953N484O563S8	None	Complex		{}	{}	c	{'ComplexFormation', 'MetabolicReaction'}
NANT-MONOMER	C2500H3882N630O635S20	None	Complex		{}	{}	im	{'ComplexFormation', 'MetabolicReaction'}
EG11639-MONOMER	C1529H2425N367O367S16	None	Complex		{}	{}	im	{'ComplexFormation', 'MetabolicReaction'}
GreB_mono	C833H1304N228O245S3	None	Complex		{}	{}	c	{'TranscriptionReaction', 'ComplexFormation'}
RlmL_dim	C7006H11094N2008O2042S50	None	Complex		{}	{}	c	{'ComplexFormation'}
G7914-MONOMER	C1041H1600N286O300S9	None	Complex		{}	{}	c	{'ComplexFormation', 'MetabolicReaction'}
SHIA-MONOMER	C2222H3431N555O573S23	None	Complex		{}	{}	im	{'ComplexFormation', 'MetabolicReaction'}
ABC-42-CPLX	C9658H15577N2556O2781S95	None	Complex		{}	{}	m	{'ComplexFormation', 'MetabolicReaction'}
EG10108-MONOMER	C787H1202N208O239S7	None	Complex		{}	{}	c	{'ComplexFormation', 'MetabolicReaction'}
CPLX0-7720	C1251H1979N295O289S16	None	Complex		{}	{}	im	{'ComplexFormation', 'MetabolicReaction'}
BADH-CPLX	C9340H14720N2560O2868S72	None	Complex		{}	{}	c	{'ComplexFormation', 'MetabolicReaction'}
LYSP-MONOMER	C2515H3823N604O647S18	None	Complex		{}	{}	im	{'ComplexFormation', 'MetabolicReaction'}
G7860-MONOMER	C1131H1735N311O329S10	None	Complex		{}	{}	c	{'ComplexFormation', 'MetabolicReaction'}
EG11591-MONOMER	C1065H1690N293O310S10	None	Complex		{}	{}	c	{'ComplexFormation'}
ALTRODEHYDRAT-MONOMER	C2375H3723N672O734S20	None	Complex		{}	{}	c	{'ComplexFormation', 'MetabolicReaction'}
RpsS_mono	C464H769N139O122S2	None	Complex		{}	{}	c	{'ComplexFormation'}
ABC-2-CPLX	C9609H15457N2562O2769S88	None	Complex		{}	{}	m	{'ComplexFormation', 'MetabolicReaction'}
YAAJ-MONOMER	C2391H3689N602O619S28	None	Complex		{}	{}	im	{'ComplexFormation', 'MetabolicReaction'}
CPLX0-7616	C5420H8860N1508O1648S52	None	Complex		{}	{}	c	{'ComplexFormation', 'MetabolicReaction'}
CPLX0-231	C11697H18818N3073O3382S107	None	Complex		{}	{}	im	{'ComplexFormation', 'MetabolicReaction'}
ABC-20-CPLX	C8167H13037N2224O2262S72	None	Complex		{}	{}	m	{'ComplexFormation', 'MetabolicReaction'}
CPLX0-3141	C1018H1620N282O296S16	None	Complex		{}	{}	c	{'ComplexFormation', 'MetabolicReaction'}
NIRC-MONOMER	C1326H2031N329O346S14	None	Complex		{}	{}	im	{'ComplexFormation', 'MetabolicReaction'}
CPLX0-7811	C3800H5968N1088O1072S28	None	Complex		{}	{}	c	{'ComplexFormation', 'MetabolicReaction'}
EG11822-MONOMER	C2087H3274N586O628S17	None	Complex		{}	{}	c	{'ComplexFormation', 'MetabolicReaction'}
CPLX0-1942	C6690H10461N1813O2036S38	None	Complex		{}	{}	m	{'ComplexFormation', 'MetabolicReaction'}
GLPT-MONOMER	C2363H3555N571O589S29	None	Complex		{}	{}	im	{'ComplexFormation', 'MetabolicReaction'}
GALACTITOLPDEHYD-MONOMER	C1675H2652N449O489S15	None	Complex		{}	{}	c	{'ComplexFormation', 'MetabolicReaction'}
PDXY-MONOMER	C1400H2212N386O401S14	None	Complex		{}	{}	c	{'ComplexFormation', 'MetabolicReaction'}
RimM_mono	C922H1425N238O281S8	None	Complex		{}	{}	c	{'ComplexFormation'}
RpsB_mono	C1180H1885N332O352S8	None	Complex		{}	{}	c	{'ComplexFormation'}
MANNPISOM-MONOMER	C1929H3012N509O572S11	None	Complex		{}	{}	c	{'ComplexFormation', 'MetabolicReaction'}
ARGSUCCINLYA-MONOMER	C2214H3520N625O679S17	None	Complex		{}	{}	c	{'ComplexFormation', 'MetabolicReaction'}
CPLX0-240	C3487H5429N957O1052S27	None	Complex		{}	{}	c	{'ComplexFormation', 'MetabolicReaction'}
CPLX0-7535	C4366H6830N1054O1134S46	None	Complex		{}	{}	im	{'ComplexFormation', 'MetabolicReaction'}
G6782-MONOMER	C944H1450N255O284S9	None	Complex		{}	{}	c	{'ComplexFormation', 'MetabolicReaction'}
DEOA-CPLX	C4148H6666N1142O1278S44	None	Complex		{}	{}	c	{'ComplexFormation', 'MetabolicReaction'}
GLUCONOKINI-MONOMER	C919H1476N266O279S9	None	Complex		{}	{}	c	{'ComplexFormation', 'MetabolicReaction'}
PHEP-MONOMER	C2380H3686N585O591S23	None	Complex		{}	{}	im	{'ComplexFormation', 'MetabolicReaction'}
HEMX-MONOMER	C1857H3006N531O622S7	None	Complex		{}	{}	c	{'ComplexFormation', 'MetabolicReaction'}
CHAA-MONOMER	C1812H2886N444O487S15	None	Complex		{}	{}	im	{'ComplexFormation', 'MetabolicReaction'}
CPLX0-3001	C4700H7422N1272O1426S30	None	Complex		{}	{}	c	{'ComplexFormation', 'MetabolicReaction'}
InfB_mono	C4180H6891N1264O1357S24	None	Complex		{}	{}	c	{'ComplexFormation', 'TranslationReaction'}
RIBONUCLEOSIDE-DIP-REDUCTII-CPLX	C10456H16054N2802O3138S72	None	Complex		{}	{}	c	{'ComplexFormation', 'MetabolicReaction'}
EG11984-MONOMER	C975H1562N274O273S6	None	Complex		{}	{}	c	{'ComplexFormation', 'MetabolicReaction'}
ABC-12-CPLX	C5906H9470N1559O1620S36	None	Complex		{}	{}	m	{'ComplexFormation', 'MetabolicReaction'}
EG11189-MONOMER	C1603H2526N455O449S6	None	Complex		{}	{}	c	{'ComplexFormation', 'MetabolicReaction'}
ACETOACETYL-COA-TRANSFER-CPLX	C4076H6644N1148O1226S50	None	Complex		{}	{}	c	{'ComplexFormation', 'MetabolicReaction'}
CPLX0-7643	C9560H15112N2568O2896S104	None	Complex		{}	{}	c	{'ComplexFormation', 'MetabolicReaction'}
ADHP-MONOMER	C1555H2500N433O475S16	None	Complex		{}	{}	c	{'ComplexFormation', 'MetabolicReaction'}
ASL-MONOMER	C2316H3625N628O682S11	None	Complex		{}	{}	c	{'ComplexFormation', 'MetabolicReaction'}
CPLX0-3741	C4038H6600N1172O1262S26	None	Complex		{}	{}	c	{'ComplexFormation', 'MetabolicReaction'}
APO-ENTB	C7265H11260N1955O2125S85	None	Complex		{}	{}	c	{'ComplexFormation', 'MetabolicReaction'}
RpmE_mono	C339H553N104O100S6	None	Complex		{}	{}	c	{'ComplexFormation'}
CPLX0-7653	C4464H6840N1092O1148S20	None	Complex		{}	{}	im	{'ComplexFormation', 'MetabolicReaction'}
RpsO_mono	C439H737N144O130S	None	Complex		{}	{}	c	{'ComplexFormation'}
B0070-MONOMER	C1977H3108N488O501S31	None	Complex		{}	{}	im	{'ComplexFormation', 'MetabolicReaction'}
G7410-MONOMER	C1872H2887N496O524P0S12	None	Complex		{}	{}	om	{'ComplexFormation', 'MetabolicReaction'}
G7167-MONOMER	C1629H2587N447O462S16	None	Complex		{}	{}	im	{'ComplexFormation', 'MetabolicReaction'}
GABP-MONOMER	C2392H3767N583O602S24	None	Complex		{}	{}	im	{'ComplexFormation', 'MetabolicReaction'}
CPLX0-1721	C24974H39917N6657O7219P0S158	None	Complex		{}	{}	m	{'ComplexFormation', 'MetabolicReaction'}
RHAT-MONOMER	C1744H2730N425O432S24	None	Complex		{}	{}	im	{'ComplexFormation', 'MetabolicReaction'}
G7431-MONOMER	C625H952N165O173S7	None	Complex		{}	{}	c	{'ComplexFormation', 'MetabolicReaction'}
DHPDIOXYGEN-CPLX	C6160H9492N1668O1776S44	None	Complex		{}	{}	c	{'ComplexFormation', 'MetabolicReaction'}
NHAB-MONOMER	C2652H4158N639O689S22	None	Complex		{}	{}	im	{'ComplexFormation', 'MetabolicReaction'}
RlmH_dim	C1564H2500N430O440S10	None	Complex		{}	{}	c	{'ComplexFormation'}
CARNDEHYDRA-CPLX	C4058H6222N1054O1182S48	None	Complex		{}	{}	c	{'ComplexFormation', 'MetabolicReaction'}
RpmH_mono	C228H419N90O57S2	None	Complex		{}	{}	c	{'ComplexFormation'}
CPLX0-7520	C7670H12440N1990O2270S50	None	Complex		{}	{}	c	{'ComplexFormation', 'MetabolicReaction'}
CPLX0-252	C2944H4688N814O918S26	None	Complex		{}	{}	c	{'ComplexFormation', 'MetabolicReaction'}
FRUCBISALD-CLASSII	C3482H5384N928O1066S22	None	Complex		{}	{}	c	{'ComplexFormation', 'MetabolicReaction'}
B2170-MONOMER	C1983H3112N493O502S27	None	Complex		{}	{}	im	{'ComplexFormation', 'MetabolicReaction'}
THIOREDOXIN-REDUCT-NADPH-CPLX	C1507H2383N429O476S11	None	Complex		{}	{}	c	{'ComplexFormation', 'MetabolicReaction'}
RHTC-MONOMER	C1049H1659N263O255S14	None	Complex		{}	{}	im	{'ComplexFormation', 'MetabolicReaction'}
ATPASE-1-CPLX_no_MONOMER0-12	C6855H11006N1804O1936S62	None	Complex		{}	{}	im	{'ComplexFormation', 'MetabolicReaction'}
RlmF_mono	C1517H2390N447O439S10	None	Complex		{}	{}	c	{'ComplexFormation'}
ABC-11-CPLX	C10593H17014N2800O2777S113	None	Complex		{}	{}	m	{'ComplexFormation', 'MetabolicReaction'}
ABC-14-CPLX	C6222H9925N1649O1763S40	None	Complex		{}	{}	m	{'ComplexFormation', 'MetabolicReaction'}
Tig_mono	C2119H3404N582O674S11	None	Complex		{}	{}	c	{'ComplexFormation'}
CPLX0-251	C3832H6042N1074O1134S28	None	Complex		{}	{}	c	{'ComplexFormation', 'MetabolicReaction'}
CPLX0-7819	C6142H9886N1624O1698S60	None	Complex		{}	{}	im	{'ComplexFormation', 'MetabolicReaction'}
Asp_RS_dim	C5844H9254N1624O1742S52	None	Complex		{}	{}	c	{'tRNAChargingReaction', 'ComplexFormation'}
EG10299-MONOMER	C1929H2935N535O535S12	None	Complex		{}	{}	c	{'ComplexFormation', 'MetabolicReaction'}
YCHM-MONOMER	C2736H4421N704O712S27	None	Complex		{}	{}	im	{'ComplexFormation', 'MetabolicReaction'}
RpmG_mono	C284H485N81O76S0	None	Complex		{}	{}	c	{'ComplexFormation'}
ABC-27-CPLX	C7355H11622N1873O2070S58	None	Complex		{}	{}	m	{'ComplexFormation', 'MetabolicReaction'}
CPLX0-7717	C8354H13012N2304O2492S52	None	Complex		{}	{}	im	{'ComplexFormation', 'MetabolicReaction'}
CPLX0-1923_EG10306-MONOMER	C6627H10315N1795O2040S42	None	Complex		{}	{}	m	{'ComplexFormation', 'MetabolicReaction'}
B1296-MONOMER	C2403H3696N577O609S14	None	Complex		{}	{}	im	{'ComplexFormation', 'MetabolicReaction'}
EG12312-MONOMER	C999H1604N292O301S3	None	Complex		{}	{}	c	{'ComplexFormation', 'MetabolicReaction'}
ABC-56-CPLX	C6734H10847N1828O1849S28	None	Complex		{}	{}	m	{'ComplexFormation', 'MetabolicReaction'}
RFBX-MONOMER	C2131H3450N510O546S14	None	Complex		{}	{}	im	{'ComplexFormation', 'MetabolicReaction'}
B0709-MONOMER	C2519H3897N619O653S27	None	Complex		{}	{}	im	{'ComplexFormation', 'MetabolicReaction'}
THIG-MONOMER	C1196H1929N327O355S10	None	Complex		{}	{}	c	{'ComplexFormation', 'MetabolicReaction'}
G7493-MONOMER	C1458H2374N405O448S10	None	Complex		{}	{}	c	{'ComplexFormation', 'MetabolicReaction'}
SPOT-MONOMER	C3505H5659N1013O1023S31	None	Complex		{}	{}	c	{'ComplexFormation', 'MetabolicReaction'}
MALONYL-COA-ACP-TRANSACYL-MONOMER	C1431H2265N383O435S15	None	Complex		{}	{}	c	{'ComplexFormation', 'MetabolicReaction'}
ASPKINIII-CPLX	C4290H6932N1182O1308S24	None	Complex		{}	{}	c	{'ComplexFormation', 'MetabolicReaction'}
CPLX0-1581	C2044H2892N510O538S10	None	Complex		{}	{}	om	{'ComplexFormation', 'MetabolicReaction'}
CPLX0-1669	C5430H8584N1470O1580S56	None	Complex		{}	{}	c	{'ComplexFormation', 'MetabolicReaction'}
EG11339-MONOMER	C1900H2937N526O547S12	None	Complex		{}	{}	c	{'ComplexFormation', 'MetabolicReaction'}
GLUTSEMIALDEHYDROG-CPLX	C7752H12756N2244O2440S64	None	Complex		{}	{}	c	{'ComplexFormation', 'MetabolicReaction'}
HCAMULTI-CPLX	C5634H8713N1590O1685S40	None	Complex		{}	{}	c	{'ComplexFormation', 'MetabolicReaction'}
CPLX0-2081	C8872H14101N2412O2804S76	None	Complex		{}	{}	c	{'ComplexFormation', 'MetabolicReaction'}
GNTT-MONOMER	C2133H3444N507O553S29	None	Complex		{}	{}	im	{'ComplexFormation', 'MetabolicReaction'}
MONOMER0-341	C1506H2227N390O444S8	None	Complex		{}	{}	om	{'ComplexFormation', 'MetabolicReaction'}
CPLX0-7717_G6561-MONOMER	C10949H17149N2939O3137S75	None	Complex		{}	{}	im	{'ComplexFormation', 'MetabolicReaction'}
EG12438-MONOMER	C1233H1897N355O356S9	None	Complex		{}	{}	c	{'ComplexFormation', 'MetabolicReaction'}
QueA_mono	C1767H2742N472O529S11	None	Complex		{}	{}	c	{'tRNAChargingReaction', 'ComplexFormation'}
DCTA-MONOMER	C2097H3400N516O562S19	None	Complex		{}	{}	im	{'ComplexFormation', 'MetabolicReaction'}
CPLX0-7847	C3142H5066N862O908S24	None	Complex		{}	{}	c	{'ComplexFormation', 'MetabolicReaction'}
MALTODEXGLUCOSID-MONOMER	C3107H4673N871O881S22	None	Complex		{}	{}	c	{'ComplexFormation', 'MetabolicReaction'}
Rrf_mono	C888H1494N263O287S6	None	Complex		{}	{}	c	{'ComplexFormation', 'TranslationReaction'}
CPLX-157	C11518H18351N2998O3383S84	None	Complex		{}	{}	im	{'ComplexFormation', 'MetabolicReaction'}
3-OXOACYL-ACP-REDUCT-MONOMER	C1108H1826N323O346S11	None	Complex		{}	{}	c	{'ComplexFormation', 'MetabolicReaction'}
NICOTINATEPRIBOSYLTRANS-MONOMER	C2057H3176N572O591S12	None	Complex		{}	{}	c	{'ComplexFormation', 'MetabolicReaction'}
CPLX-163	C12301H19686N3279O3678S98	None	Complex		{}	{}	im	{'ComplexFormation', 'MetabolicReaction'}
CPLX0-7878	C10692H17068N2976O3252S92	None	Complex		{}	{}	c	{'ComplexFormation', 'MetabolicReaction'}
GALP-MONOMER	C2355H3716N594O613S26	None	Complex		{}	{}	im	{'ComplexFormation', 'MetabolicReaction'}
G7859-MONOMER	C1421H2219N390O420S16	None	Complex		{}	{}	c	{'ComplexFormation', 'MetabolicReaction'}
CPLX0-236	C2902H4392N820O820S20	None	Complex		{}	{}	c	{'ComplexFormation', 'MetabolicReaction'}
ALDOSE1EPIM-MONOMER	C1693H2573N466O529S8	None	Complex		{}	{}	p	{'ComplexFormation', 'MetabolicReaction'}
AMINEOXID-CPLX	C7578H11670N2030O2252S46	None	Complex		{}	{}	p	{'ComplexFormation', 'MetabolicReaction'}
YggJ_dim	C2364H3854N686O710S22	None	Complex		{}	{}	c	{'ComplexFormation'}
G6519-MONOMER	C958H1489N264O290S7	None	Complex		{}	{}	c	{'ComplexFormation', 'MetabolicReaction'}
RplE_mono	C905H1460N251O258S6	None	Complex		{}	{}	c	{'ComplexFormation'}
CPLX0-7843	C7195H11085N1730O1870S100	None	Complex		{}	{}	im	{'ComplexFormation', 'MetabolicReaction'}
GLUCONREDUCT-MONOMER	C1229H1953N339O360S10	None	Complex		{}	{}	c	{'ComplexFormation', 'MetabolicReaction'}
CPLX-168	C11530H18529N3024O3367S96	None	Complex		{}	{}	im	{'ComplexFormation', 'MetabolicReaction'}
ASP-SEMIALDEHYDE-DEHYDROGENASE-CPLX	C3546H5644N980O1062S32	None	Complex		{}	{}	c	{'ComplexFormation', 'MetabolicReaction'}
EG12130-MONOMER_EG12131-MONOMER	C3754H6031N1077O1179S20	None	Complex		{}	{}	c	{'ComplexFormation', 'MetabolicReaction'}
FusA_mono	C3429H5418N942O1049S25	None	Complex		{}	{}	c	{'ComplexFormation', 'TranslationReaction'}
CYSTATHIONINE-BETA-LYASE-CPLX	C7720H12092N2116O2272S60	None	Complex		{}	{}	c	{'ComplexFormation', 'MetabolicReaction'}
RpsT_mono	C414H722N138O115S3	None	Complex		{}	{}	c	{'ComplexFormation'}
EG10606-MONOMER	C3182H4970N882O927S14	None	Complex		{}	{}	im	{'ComplexFormation', 'MetabolicReaction'}
MHPHYDROXY-MONOMER	C2774H4376N790O783S27	None	Complex		{}	{}	c	{'ComplexFormation', 'MetabolicReaction'}
CPLX0-201	C12348H20124N3264O3636S108	None	Complex		{}	{}	c	{'ComplexFormation', 'MetabolicReaction'}
ABC-34-CPLX	C8734H13646N2295O2445S73	None	Complex		{}	{}	m	{'ComplexFormation', 'MetabolicReaction'}
AMYLOMALT-MONOMER	C3514H5411N962O1019S33	None	Complex		{}	{}	c	{'ComplexFormation', 'MetabolicReaction'}
TDK-MONOMER	C1034H1616N290O314S10	None	Complex		{}	{}	c	{'ComplexFormation', 'MetabolicReaction'}
2-OCTAPRENYL-METHOXY-BENZOQ-METH-MONOMER	C1251H1973N343O367S12	None	Complex		{}	{}	c	{'ComplexFormation', 'MetabolicReaction'}
PURK-CPLX	C3544H5520N984O1018S22	None	Complex		{}	{}	c	{'ComplexFormation', 'MetabolicReaction'}
CPLX0-3971	C2889H4566N774O906S18	None	Complex		{}	{}	c	{'ComplexFormation', 'MetabolicReaction'}
RpsU_mono	C366H631N125O98S	None	Complex		{}	{}	c	{'ComplexFormation'}
Pro_RS_dim	C5664H8956N1548O1716S36	None	Complex		{}	{}	c	{'tRNAChargingReaction', 'ComplexFormation'}
YccK_mono	C566H885N144O161S4	None	Complex		{}	{}	c	{'tRNAChargingReaction', 'ComplexFormation'}
EG11110-MONOMER	C697H1097N190O198S8	None	Complex		{}	{}	c	{'ComplexFormation', 'MetabolicReaction'}
AMP-NUCLEOSID-CPLX	C14496H22374N4020O4314S60	None	Complex		{}	{}	c	{'ComplexFormation', 'MetabolicReaction'}
RplB_mono	C1294H2170N425O366S7	None	Complex		{}	{}	c	{'ComplexFormation'}
RsmF_mono	C2394H3687N653O695S15	None	Complex		{}	{}	c	{'ComplexFormation'}
G6567-MONOMER	C1644H2601N480O497S17	None	Complex		{}	{}	c	{'ComplexFormation', 'MetabolicReaction'}
TRANS-CPLX-203	C4568H7240N1129O1219S43	None	Complex		{}	{}	m	{'ComplexFormation', 'MetabolicReaction'}
G6716-MONOMER	C2303H3704N637O681S16	None	Complex		{}	{}	c	{'ComplexFormation', 'MetabolicReaction'}
RplW_mono	C496H847N146O143S2	None	Complex		{}	{}	c	{'ComplexFormation'}
NUPC-MONOMER	C2023H3207N484O535S19	None	Complex		{}	{}	im	{'ComplexFormation', 'MetabolicReaction'}
ABC-26-CPLX	C8974H14364N2418O2581S67	None	Complex		{}	{}	m	{'ComplexFormation', 'MetabolicReaction'}
G6622-MONOMER	C1048H1683N275O293P0S8	None	Complex		{}	{}	om	{'ComplexFormation', 'MetabolicReaction'}
6PGLUCONDEHYDROG-CPLX	C4622H7202N1218O1408S18	None	Complex		{}	{}	c	{'ComplexFormation', 'MetabolicReaction'}
CAIC-MONOMER	C2611H4051N706O764S31	None	Complex		{}	{}	c	{'ComplexFormation', 'MetabolicReaction'}
PYRNUTRANSHYDROGEN-CPLX	C9342H14884N2424O2672S86	None	Complex		{}	{}	im	{'ComplexFormation', 'MetabolicReaction'}
CITRATE-SI-SYNTHASE	C12816H19938N3480O3768S156	None	Complex		{}	{}	c	{'ComplexFormation', 'MetabolicReaction'}
YEAV-MONOMER	C2477H3813N597O647S18	None	Complex		{}	{}	im	{'ComplexFormation', 'MetabolicReaction'}
DTDPDEHYRHAMREDUCT-MONOMER	C1473H2277N395O434S7	None	Complex		{}	{}	c	{'ComplexFormation', 'MetabolicReaction'}
EG11702-MONOMER	C1330H2037N367O379S14	None	Complex		{}	{}	c	{'ComplexFormation', 'MetabolicReaction'}
EG12407-MONOMER	C1444H2308N405O460S17	None	Complex		{}	{}	c	{'ComplexFormation', 'MetabolicReaction'}
UROGENDECARBOX-MONOMER	C1755H2744N479O507S18	None	Complex		{}	{}	c	{'ComplexFormation', 'MetabolicReaction'}
RlmM_mono	C1884H2912N519O527S20	None	Complex		{}	{}	c	{'ComplexFormation'}
CPLX0-7732	C2704H4482N772O854S30	None	Complex		{}	{}	c	{'ComplexFormation', 'MetabolicReaction'}
ThiI_mono	C2453H3913N686O719S14	None	Complex		{}	{}	c	{'tRNAChargingReaction', 'ComplexFormation'}
ABC-25-CPLX	C8665H13754N2276O2395S81	None	Complex		{}	{}	m	{'ComplexFormation', 'MetabolicReaction'}
ABC-33-CPLX	C10294H16824N2797O2993S96	None	Complex		{}	{}	m	{'ComplexFormation', 'MetabolicReaction'}
GrpE_dim	C1882H3082N530O616S18	None	Complex		{}	{}	c	{'ComplexFormation', 'TranslationReaction'}
G7841-MONOMER	C1718H2729N495O532S11	None	Complex		{}	{}	c	{'ComplexFormation', 'MetabolicReaction'}
AROA-MONOMER	C2034H3248N555O623S20	None	Complex		{}	{}	c	{'ComplexFormation', 'MetabolicReaction'}
transGroES_hepta	C3178H5341N889O1015S14	None	Complex		{}	{}	c	{'ComplexFormation', 'TranslationReaction'}
DCTP-DEAM-CPLX	C2823H4488N813O834S18	None	Complex		{}	{}	c	{'ComplexFormation', 'MetabolicReaction'}
RpoS_mono	C1661H2674N483O524S5	None	Complex		{}	{}	c	{'ComplexFormation'}
EG10048-MONOMER	C1411H2158N375O408S12	None	Complex		{}	{}	c	{'ComplexFormation', 'MetabolicReaction'}
ENTA-CPLX	C9224H14616N2592O2880S64	None	Complex		{}	{}	c	{'ComplexFormation', 'MetabolicReaction'}
POTE-MONOMER	C2141H3353N516O582S27	None	Complex		{}	{}	im	{'ComplexFormation', 'MetabolicReaction'}
RplR_mono	C557H936N179O163S	None	Complex		{}	{}	c	{'ComplexFormation'}
ALARACEBIOSYN-MONOMER	C1733H2763N498O506S15	None	Complex		{}	{}	c	{'ComplexFormation', 'MetabolicReaction'}
LCTP-MONOMER	C2807H4321N650O712S19	None	Complex		{}	{}	im	{'ComplexFormation', 'MetabolicReaction'}
G6522-MONOMER	C1146H1748N298O332S6	None	Complex		{}	{}	c	{'ComplexFormation', 'MetabolicReaction'}
7KAPSYN-CPLX	C3648H5788N1080O1086S24	None	Complex		{}	{}	c	{'ComplexFormation', 'MetabolicReaction'}
G6521-MONOMER	C628H975N159O180S4	None	Complex		{}	{}	c	{'ComplexFormation', 'MetabolicReaction'}
RbfA_mono	C656H1073N186O202S7	None	Complex		{}	{}	c	{'ComplexFormation'}
METHGLYSYN-CPLX	C4554H7194N1254O1290S42	None	Complex		{}	{}	c	{'ComplexFormation', 'MetabolicReaction'}
ANSA-CPLX	C3302H5162N902O994S26	None	Complex		{}	{}	c	{'ComplexFormation', 'MetabolicReaction'}
MHPELY-MONOMER	C1586H2521N463O488S18	None	Complex		{}	{}	c	{'ComplexFormation', 'MetabolicReaction'}
EG10564-MONOMER	C1963H3001N520O569S20	None	Complex		{}	{}	c	{'ComplexFormation', 'MetabolicReaction'}
CPLX0-7466	C4666H7326N1304O1374S48	None	Complex		{}	{}	c	{'ComplexFormation', 'MetabolicReaction'}
MANNPGUANYLTRANGDP-MONOMER	C2353H3677N648O709S19	None	Complex		{}	{}	c	{'ComplexFormation', 'MetabolicReaction'}
CPLX0-7877	C5550H8498N1476O1632S32	None	Complex		{}	{}	c	{'ComplexFormation', 'MetabolicReaction'}
TRANSALDOLA-MONOMER	C1594H2526N436O473S9	None	Complex		{}	{}	c	{'ComplexFormation', 'MetabolicReaction'}
CPLX0-7462	C2778H4376N728O844S30	None	Complex		{}	{}	c	{'ComplexFormation', 'MetabolicReaction'}
GUANYL-KIN-CPLX	C2086H3286N596O630S12	None	Complex		{}	{}	c	{'ComplexFormation', 'MetabolicReaction'}
CMR-MONOMER	C2056H3266N512O529S22	None	Complex		{}	{}	im	{'ComplexFormation', 'MetabolicReaction'}
ALPHA-AMYL-CYTO-MONOMER	C2560H3757N660O765S18	None	Complex		{}	{}	c	{'ComplexFormation', 'MetabolicReaction'}
MANNONDEHYDRAT-MONOMER	C1992H3099N555O591S17	None	Complex		{}	{}	c	{'ComplexFormation', 'MetabolicReaction'}
CPLX0-7887	C4146H6510N1150O1176S36	None	Complex		{}	{}	c	{'ComplexFormation', 'MetabolicReaction'}
CPLX-164	C12038H19283N3152O3515S98	None	Complex		{}	{}	im	{'ComplexFormation', 'MetabolicReaction'}
DALADALALIGA-MONOMER	C1747H2775N473O536S10	None	Complex		{}	{}	c	{'ComplexFormation', 'MetabolicReaction'}
PGPPHOSPHAB-MONOMER	C1358H2112N361O332S7	None	Complex		{}	{}	im	{'ComplexFormation', 'MetabolicReaction'}
ABC-5-CPLX	C6946H11233N1909O1872S63	None	Complex		{}	{}	m	{'ComplexFormation', 'MetabolicReaction'}
EG10723-MONOMER	C908H1457N278O267S6	None	Complex		{}	{}	c	{'ComplexFormation', 'MetabolicReaction'}
UDPACYLGLCNACDEACETYL-MONOMER	C1517H2373N413O444S14	None	Complex		{}	{}	c	{'ComplexFormation', 'MetabolicReaction'}
CPLX0-2061	C3208H5092N902O980S36	None	Complex		{}	{}	c	{'ComplexFormation', 'MetabolicReaction'}
SPERMIDINESYN-CPLX	C2886H4318N776O856S24	None	Complex		{}	{}	c	{'ComplexFormation', 'MetabolicReaction'}
MANNPDEHYDROG-MONOMER	C1825H2929N506O555S9	None	Complex		{}	{}	c	{'ComplexFormation', 'MetabolicReaction'}
GAPDH-A-CPLX	C6252H10024N1724O1936S40	None	Complex		{}	{}	c	{'ComplexFormation', 'MetabolicReaction'}
KsgA_mono	C1352H2143N376O388S13	None	Complex		{}	{}	c	{'ComplexFormation'}
GLTS-MONOMER	C1970H3166N478O507S24	None	Complex		{}	{}	im	{'ComplexFormation', 'MetabolicReaction'}
Asn_RS_dim	C4698H7210N1284O1396S26	None	Complex		{}	{}	c	{'tRNAChargingReaction', 'ComplexFormation'}
HMP-P-KIN-CPLX	C5032H8040N1436O1536S40	None	Complex		{}	{}	c	{'ComplexFormation', 'MetabolicReaction'}
CPLX0-7660	C3656H5848N1044O1112S32	None	Complex		{}	{}	c	{'ComplexFormation', 'MetabolicReaction'}
EG12015-MONOMER	C1505H2453N420O435S16	None	Complex		{}	{}	p	{'ComplexFormation', 'MetabolicReaction'}
EG11600-MONOMER	C1382H2108N370O412S5	None	Complex		{}	{}	c	{'ComplexFormation', 'MetabolicReaction'}
G7446-MONOMER	C2179H3376N610O636S17	None	Complex		{}	{}	c	{'ComplexFormation', 'MetabolicReaction'}
EG12318-MONOMER	C2517H3934N699O721S32	None	Complex		{}	{}	p	{'ComplexFormation', 'MetabolicReaction'}
ERYTHRON4PDEHYDROG-MONOMER	C1851H2965N514O539S10	None	Complex		{}	{}	c	{'ComplexFormation', 'MetabolicReaction'}
ABC-304-CPLX	C7841H12479N2069O2202S75	None	Complex		{}	{}	m	{'ComplexFormation', 'MetabolicReaction'}
IMP-DEHYDROG-CPLX	C9036H14864N2628O2840S72	None	Complex		{}	{}	c	{'ComplexFormation', 'MetabolicReaction'}
G6960-MONOMER	C1368H2096N373O415S12	None	Complex		{}	{}	c	{'ComplexFormation', 'MetabolicReaction'}
RhlB_dim	C4172H6646N1206O1220S24	None	Complex		{}	{}	c	{'ComplexFormation'}
DusB_mono	C1583H2521N455O466S15	None	Complex		{}	{}	c	{'GenericFormationReaction', 'ComplexFormation'}
EG12445-MONOMER	C1001H1561N243O250S8	None	Complex		{}	{}	im	{'ComplexFormation', 'MetabolicReaction'}
CPLX0-7629	C3874H6218N960O974S28	None	Complex		{}	{}	im	{'ComplexFormation', 'MetabolicReaction'}
CPLX-158	C12934H20986N3458O3892S114	None	Complex		{}	{}	im	{'ComplexFormation', 'MetabolicReaction'}
GLYC3PDEHYDROGBIOSYN-CPLX	C3180H5130N928O962S30	None	Complex		{}	{}	c	{'ComplexFormation', 'MetabolicReaction'}
EG11796-MONOMER	C1673H2605N476O503S11	None	Complex		{}	{}	c	{'ComplexFormation', 'MetabolicReaction'}
GLYCOGEN-BRANCH-MONOMER	C3821H5675N1060O1076S20	None	Complex		{}	{}	c	{'ComplexFormation', 'MetabolicReaction'}
CPLX0-3954	C5616H8360N1496O1640S60	None	Complex		{}	{}	c	{'ComplexFormation', 'MetabolicReaction'}
CPLX0-2141	C9242H14769N2477O2814P0S54	None	Complex		{}	{}	m	{'ComplexFormation', 'MetabolicReaction'}
DALADALALIGB-CPLX	C2918H4624N762O890S24	None	Complex		{}	{}	c	{'ComplexFormation', 'MetabolicReaction'}
G7949-MONOMER	C1352H2110N370O382S14	None	Complex		{}	{}	c	{'ComplexFormation', 'MetabolicReaction'}
TDPFUCACTRANS-MONOMER	C1077H1692N307O322S4	None	Complex		{}	{}	c	{'ComplexFormation', 'MetabolicReaction'}
ACETYL-COA-ACETYLTRANSFER-CPLX	C7064H11592N2000O2168S68	None	Complex		{}	{}	c	{'ComplexFormation', 'MetabolicReaction'}
ABC-63-CPLX	C6552H10637N1769O1810S57	None	Complex		{}	{}	m	{'ComplexFormation', 'MetabolicReaction'}
EG12210-MONOMER	C1753H2756N485O492S17	None	Complex		{}	{}	c	{'ComplexFormation', 'MetabolicReaction'}
G6208-MONOMER	C1412H2120N377O414S13	None	Complex		{}	{}	c	{'ComplexFormation', 'MetabolicReaction'}
UMPKI-CPLX	C6840H11202N1902O2028S78	None	Complex		{}	{}	c	{'ComplexFormation', 'MetabolicReaction'}
AROD-CPLX	C2434H3930N646O748S22	None	Complex		{}	{}	c	{'ComplexFormation', 'MetabolicReaction'}
CPLX0-7788	C7844H12438N2152O2408S104	None	Complex		{}	{}	c	{'ComplexFormation', 'MetabolicReaction'}
CPLX0-225	C7452H11620N2112O2192S16	None	Complex		{}	{}	c	{'ComplexFormation', 'MetabolicReaction'}
EG11035-MONOMER	C1537H2179N396O449S6	None	Complex		{}	{}	om	{'ComplexFormation', 'MetabolicReaction'}
CPDB-MONOMER	C3166H4928N842O966S18	None	Complex		{}	{}	p	{'ComplexFormation', 'MetabolicReaction'}
PROTOHEME-FERROCHELAT-MONOMER	C1603H2523N439O462S17	None	Complex		{}	{}	c	{'ComplexFormation', 'MetabolicReaction'}
MALATE-DEHASE	C2876H4716N772O882S14	None	Complex		{}	{}	c	{'ComplexFormation', 'MetabolicReaction'}
G7458-MONOMER	C2022H3295N574O603S11	None	Complex		{}	{}	p	{'ComplexFormation', 'MetabolicReaction'}
CPLX-165	C11492H18540N3050O3421S98	None	Complex		{}	{}	im	{'ComplexFormation', 'MetabolicReaction'}
GRXB-MONOMER_EG12237-MONOMER	C1792H2890N487O529S15	None	Complex		{}	{}	c	{'ComplexFormation', 'MetabolicReaction'}
ABC-35-CPLX	C5602H8904N1528O1502S43	None	Complex		{}	{}	m	{'ComplexFormation', 'MetabolicReaction'}
ENOYL-ACP-REDUCT-NADH-MONOMER	C1226H1942N335O371S13	None	Complex		{}	{}	c	{'ComplexFormation', 'MetabolicReaction'}
PrfA_mono	C1737H2775N526O564S14	None	Complex		{}	{}	c	{'GenericFormationReaction', 'ComplexFormation', 'TranslationReaction'}
PYRROLINECARBREDUCT-CPLX	C12460H20250N3300O3710S180	None	Complex		{}	{}	c	{'ComplexFormation', 'MetabolicReaction'}
PSD-MONOMER	C1630H2554N425O469S10	None	Complex		{}	{}	c	{'ComplexFormation', 'MetabolicReaction'}
RlmB_dim	C2316H3800N680O698S24	None	Complex		{}	{}	c	{'ComplexFormation'}
THIOESTERII-CPLX	C5752H8848N1588O1652S20	None	Complex		{}	{}	c	{'ComplexFormation', 'MetabolicReaction'}
FUMARASE-C	C8812H14236N2532O2692S100	None	Complex		{}	{}	c	{'ComplexFormation', 'MetabolicReaction'}
RpoE_mono	C960H1539N271O291S5	None	Complex		{}	{}	c	{'ComplexFormation'}
CPLX0-3951	C8358H13284N2370O2486S58	None	Complex		{}	{}	im	{'ComplexFormation', 'MetabolicReaction'}
EG10168-MONOMER	C2652H4116N673O696S16	None	Complex		{}	{}	im	{'PostTranslationReaction', 'ComplexFormation'}
CODB-MONOMER	C2026H3187N500O535S17	None	Complex		{}	{}	im	{'ComplexFormation', 'MetabolicReaction'}
TmcA_mono	C3347H5238N969O950S20	None	Complex		{}	{}	c	{'tRNAChargingReaction', 'ComplexFormation'}
EG10669-MONOMER	C1652H2563N455O509S8	None	Complex		{}	{}	om	{'ComplexFormation', 'MetabolicReaction'}
ASPAMINOTRANS-DIMER	C3872H6044N1072O1168S26	None	Complex		{}	{}	c	{'ComplexFormation', 'MetabolicReaction'}
THZ-KIN-MONOMER	C1194H1896N342O365S14	None	Complex		{}	{}	c	{'ComplexFormation', 'MetabolicReaction'}
ATPASE-1-CPLX	C7004H11242N1834O1973S63	None	Complex		{}	{}	im	{'ComplexFormation', 'MetabolicReaction'}
NICOTINAMID-MONOMER	C1032H1552N284O320S9	None	Complex		{}	{}	c	{'ComplexFormation', 'MetabolicReaction'}
MANNONOXIDOREDUCT-MONOMER	C2367H3718N661O708S25	None	Complex		{}	{}	c	{'ComplexFormation', 'MetabolicReaction'}
YNFJ-MONOMER	C2022H3227N517O540S23	None	Complex		{}	{}	im	{'ComplexFormation', 'MetabolicReaction'}
EG11598-MONOMER	C754H1147N213O224S2	None	Complex		{}	{}	c	{'ComplexFormation', 'MetabolicReaction'}
RpsG_mono	C874H1449N269O253S4	None	Complex		{}	{}	c	{'ComplexFormation'}
FOLD-CPLX	C2738H4444N770O822S16	None	Complex		{}	{}	c	{'ComplexFormation', 'MetabolicReaction'}
ABC-4-CPLX	C7205H11392N1876O2063S51	None	Complex		{}	{}	m	{'ComplexFormation', 'MetabolicReaction'}
RplX_mono	C498H847N148O143S0	None	Complex		{}	{}	c	{'ComplexFormation'}
CDPDIGLYPYPHOSPHA-MONOMER	C1261H2014N362O364S12	None	Complex		{}	{}	c	{'ComplexFormation', 'MetabolicReaction'}
UDPNACETYLGLUCOSAMACYLTRANS-CPLX	C3711H5913N1080O1107S27	None	Complex		{}	{}	c	{'ComplexFormation', 'MetabolicReaction'}
ABC-13-CPLX	C5115H8136N1319O1427S49	None	Complex		{}	{}	m	{'ComplexFormation', 'MetabolicReaction'}
ACS-MONOMER	C3229H4966N876O961S20	None	Complex		{}	{}	c	{'ComplexFormation', 'MetabolicReaction'}
CPLX0-821	C20928H32088N5412O6060S192	None	Complex		{}	{}	c	{'ComplexFormation', 'MetabolicReaction'}
EG10201-MONOMER	C1986H3130N539O584S17	None	Complex		{}	{}	im	{'ComplexFormation', 'MetabolicReaction'}
SUCCGLUALDDEHYD-MONOMER	C2358H3703N672O694S14	None	Complex		{}	{}	c	{'ComplexFormation', 'MetabolicReaction'}
TPI-CPLX	C2374H3802N666O726S20	None	Complex		{}	{}	c	{'ComplexFormation', 'MetabolicReaction'}
CPLX-153	C10679H17302N2791O3144S98	None	Complex		{}	{}	im	{'ComplexFormation', 'MetabolicReaction'}
RpsA_mono	C2690H4315N751O856S8	None	Complex		{}	{}	c	{'ComplexFormation'}
EG10041-MONOMER	C918H1392N255O269S7	None	Complex		{}	{}	c	{'ComplexFormation', 'MetabolicReaction'}
ABC-8-CPLX	C9164H14554N2457O2584S94	None	Complex		{}	{}	m	{'ComplexFormation', 'MetabolicReaction'}
PRAI-IGPS	C2196H3461N611O659S12	None	Complex		{}	{}	c	{'ComplexFormation', 'MetabolicReaction'}
G7146-MONOMER	C1265H1982N309O306S11	None	Complex		{}	{}	im	{'ComplexFormation', 'MetabolicReaction'}
RplA_mono	C1076H1815N314O329S6	None	Complex		{}	{}	c	{'ComplexFormation'}
PRIBFAICARPISOM-MONOMER	C1150H1850N323O354S5	None	Complex		{}	{}	c	{'ComplexFormation', 'MetabolicReaction'}
EG12195-MONOMER	C1011H1566N268O302S8	None	Complex		{}	{}	c	{'ComplexFormation'}
URAA-MONOMER	C2110H3401N504O547S15	None	Complex		{}	{}	im	{'ComplexFormation', 'MetabolicReaction'}
ABC-40-CPLX	C7630H12250N2057O2115S46	None	Complex		{}	{}	m	{'ComplexFormation', 'MetabolicReaction'}
RplK_mono	C651H1088N179O196S6	None	Complex		{}	{}	c	{'ComplexFormation'}
YHAU-MONOMER	C2314H3542N543O580S24	None	Complex		{}	{}	im	{'ComplexFormation', 'MetabolicReaction'}
FABB-CPLX	C3706H5880N1038O1172S46	None	Complex		{}	{}	c	{'ComplexFormation', 'MetabolicReaction'}
RplO_mono	C654H1130N207O190S2	None	Complex		{}	{}	c	{'ComplexFormation'}
ABC-22-CPLX	C9127H14475N2393O2577S87	None	Complex		{}	{}	m	{'ComplexFormation', 'MetabolicReaction'}
EG10154-MONOMER	C1161H1877N324O358S19	None	Complex		{}	{}	c	{'ComplexFormation', 'MetabolicReaction'}
ENTD-MONOMER	C1051H1615N284O300S7	None	Complex		{}	{}	c	{'ComplexFormation', 'MetabolicReaction'}
ARCD-MONOMER	C2313H3680N562O586S24	None	Complex		{}	{}	im	{'ComplexFormation', 'MetabolicReaction'}
FliA_mono	C1200H1938N356O375S5	None	Complex		{}	{}	c	{'ComplexFormation'}
AROE-MONOMER	C1319H2068N358O388S8	None	Complex		{}	{}	c	{'ComplexFormation', 'MetabolicReaction'}
TruB_mono	C1545H2485N439O470S11	None	Complex		{}	{}	c	{'tRNAChargingReaction', 'ComplexFormation'}
RplC_mono	C979H1617N288O294S4	None	Complex		{}	{}	c	{'TranscriptionReaction', 'ComplexFormation'}
IDONDEHYD-MONOMER	C1641H2566N444O491S24	None	Complex		{}	{}	c	{'ComplexFormation', 'MetabolicReaction'}
ABC-32-CPLX	C9381H14969N2468O2509S87	None	Complex		{}	{}	im	{'ComplexFormation', 'MetabolicReaction'}
CPLX0-3970	C9096H14454N2387O2549S85	None	Complex		{}	{}	m	{'ComplexFormation', 'MetabolicReaction'}
RIB5PISOMA-CPLX	C2024H3298N548O618S16	None	Complex		{}	{}	c	{'ComplexFormation', 'MetabolicReaction'}
6PFK-1-CPX	C6128H9804N1712O1848S72	None	Complex		{}	{}	c	{'ComplexFormation', 'MetabolicReaction'}
EG11724-MONOMER	C2164H3441N530O576S24	None	Complex		{}	{}	im	{'ComplexFormation', 'MetabolicReaction'}
TRANS-CPLX-201	C9362H14978N2522O2857P0S55	None	Complex		{}	{}	m	{'ComplexFormation', 'MetabolicReaction'}
RsmH_mono	C1530H2480N450O463S9	None	Complex		{}	{}	c	{'GenericFormationReaction', 'ComplexFormation'}
EG11905-MONOMER	C1048H1698N280O317S8	None	Complex		{}	{}	c	{'ComplexFormation', 'MetabolicReaction'}
EG11433-MONOMER	C1031H1526N280O313S10	None	Complex		{}	{}	c	{'ComplexFormation', 'MetabolicReaction'}
CPLX0-3881	C3210H5010N916O938S26	None	Complex		{}	{}	c	{'ComplexFormation', 'MetabolicReaction'}
MHPT-MONOMER	C1911H3073N479O500S25	None	Complex		{}	{}	im	{'ComplexFormation', 'MetabolicReaction'}
RpsH_mono	C616H1034N173O184S6	None	Complex		{}	{}	c	{'ComplexFormation'}
PITB-MONOMER	C2455H3950N641O659S26	None	Complex		{}	{}	im	{'ComplexFormation', 'MetabolicReaction'}
CPLX0-7694	C5820H9136N1584O1796S48	None	Complex		{}	{}	c	{'ComplexFormation', 'MetabolicReaction'}
SelB_mono	C3043H4833N901O892S17	None	Complex		{}	{}	c	{'ComplexFormation', 'TranslationReaction'}
TDCC-MONOMER	C2293H3560N539O594S22	None	Complex		{}	{}	im	{'ComplexFormation', 'MetabolicReaction'}
G6188-MONOMER	C1499H2422N422O455S9	None	Complex		{}	{}	c	{'ComplexFormation', 'MetabolicReaction'}
CHORPYRLY-MONOMER	C847H1361N226O238S4	None	Complex		{}	{}	c	{'ComplexFormation', 'MetabolicReaction'}
RpmA_mono	C391H656N129O113S	None	Complex		{}	{}	c	{'ComplexFormation'}
DEOD-CPLX	C6840H10848N1854O2058S90	None	Complex		{}	{}	c	{'ComplexFormation', 'MetabolicReaction'}
RplM_mono	C714H1163N212O199S4	None	Complex		{}	{}	c	{'TranscriptionReaction', 'ComplexFormation'}
CPLX0-7904	C5984H9476N1572O1800S84	None	Complex		{}	{}	c	{'ComplexFormation', 'MetabolicReaction'}
PURE-CPLX	C6256H9984N1784O1872S32	None	Complex		{}	{}	c	{'ComplexFormation', 'MetabolicReaction'}
TrmA_mono	C1859H2925N517O554S18	None	Complex		{}	{}	c	{'tRNAChargingReaction', 'ComplexFormation'}
COBS-MONOMER	C1206H1963N318O314S14	None	Complex		{}	{}	im	{'ComplexFormation', 'MetabolicReaction'}
KDGT-MONOMER	C1557H2520N377O417S15	None	Complex		{}	{}	im	{'ComplexFormation', 'MetabolicReaction'}
G7170-MONOMER	C2964H4466N721O732S20	None	Complex		{}	{}	im	{'ComplexFormation', 'MetabolicReaction'}
PHOSPHASERSYN-CPLX	C2372H3768N677O666S12	None	Complex		{}	{}	c	{'ComplexFormation', 'MetabolicReaction'}
EG11351-MONOMER	C1851H2850N487O524S16	None	Complex		{}	{}	c	{'ComplexFormation', 'MetabolicReaction'}
EG10696-MONOMER	C4409H6802N1206O1322S28	None	Complex		{}	{}	c	{'ComplexFormation', 'MetabolicReaction'}
ABC-10-CPLX	C7289H11893N1999O2090S52	None	Complex		{}	{}	m	{'ComplexFormation', 'MetabolicReaction'}
YGGA-MONOMER	C1090H1687N270O264S12	None	Complex		{}	{}	im	{'ComplexFormation', 'MetabolicReaction'}
PGLYCDEHYDROG-CPLX	C7844H12584N2152O2348S48	None	Complex		{}	{}	c	{'ComplexFormation', 'MetabolicReaction'}
UGD-MONOMER	C1949H3091N525O587S12	None	Complex		{}	{}	c	{'ComplexFormation', 'MetabolicReaction'}
G6806-MONOMER	C1305H1967N352O374S9	None	Complex		{}	{}	c	{'ComplexFormation', 'MetabolicReaction'}
CPLX0-1142	C4090H6344N1100O1222S36	None	Complex		{}	{}	c	{'ComplexFormation', 'MetabolicReaction'}
RIBAZOLEPHOSPHAT-MONOMER	C1036H1592N302O296S9	None	Complex		{}	{}	c	{'ComplexFormation', 'MetabolicReaction'}
EG10203-MONOMER	C1962H3075N521O577S13	None	Complex		{}	{}	im	{'ComplexFormation', 'MetabolicReaction'}
ACYLCOADEHYDROG-MONOMER	C4018H6399N1097O1137S30	None	Complex		{}	{}	im	{'ComplexFormation', 'MetabolicReaction'}
RplU_mono	C516H840N153O145S2	None	Complex		{}	{}	c	{'ComplexFormation'}
G6849-MONOMER	C1073H1587N275O294S5	None	Complex		{}	{}	c	{'ComplexFormation'}
FUCP-MONOMER	C2209H3409N540O580S19	None	Complex		{}	{}	im	{'ComplexFormation', 'MetabolicReaction'}
SDAC-MONOMER	C2180H3453N522O561S30	None	Complex		{}	{}	im	{'ComplexFormation', 'MetabolicReaction'}
PANF-MONOMER	C2412H3872N591O619S21	None	Complex		{}	{}	im	{'ComplexFormation', 'MetabolicReaction'}
CPLX0-3952	C3093H4983N858O948S30	None	Complex		{}	{}	c	{'ComplexFormation', 'MetabolicReaction'}
G6414-MONOMER_CPLX0-1923	C6609H10406N1844O2063S36	None	Complex		{}	{}	m	{'ComplexFormation', 'MetabolicReaction'}
MMUM-MONOMER	C1482H2308N415O447S10	None	Complex		{}	{}	c	{'ComplexFormation', 'MetabolicReaction'}
GDHA-CPLX	C12888H20214N3600O3852S132	None	Complex		{}	{}	c	{'ComplexFormation', 'MetabolicReaction'}
RplD_mono	C974H1620N283O290S5	None	Complex		{}	{}	c	{'TranscriptionReaction', 'ComplexFormation'}
HOMSUCTRAN-CPLX	C3234H4864N856O944S10	None	Complex		{}	{}	c	{'ComplexFormation', 'MetabolicReaction'}
ALD-CPLX	C9304H14640N2528O2776S68	None	Complex		{}	{}	c	{'ComplexFormation', 'MetabolicReaction'}
YGJE-MONOMER	C2511H3887N577O622S25	None	Complex		{}	{}	im	{'ComplexFormation', 'MetabolicReaction'}
UDPHYDROXYMYRGLUCOSAMNACETYLTRANS-MONO	C1564H2547N446O481S19	None	Complex		{}	{}	c	{'ComplexFormation', 'MetabolicReaction'}
COBU-CPLX	C1762H2808N514O534S18	None	Complex		{}	{}	c	{'ComplexFormation', 'MetabolicReaction'}
G6715-MONOMER	C1244H2008N362O372S13	None	Complex		{}	{}	c	{'ComplexFormation', 'MetabolicReaction'}
G7090-MONOMER_EG11982-MONOMER	C3742H5874N922O1031S29	None	Complex		{}	{}	im	{'ComplexFormation', 'MetabolicReaction'}
GMP-REDUCT-CPLX	C6568H10448N1828O2012S72	None	Complex		{}	{}	c	{'ComplexFormation', 'MetabolicReaction'}
G6621-MONOMER	C1500H2354N423O431S11	None	Complex		{}	{}	c	{'ComplexFormation', 'MetabolicReaction'}
G7945-MONOMER	C1612H2570N452O478S16	None	Complex		{}	{}	c	{'ComplexFormation', 'MetabolicReaction'}
MALTACETYLTRAN-CPLX	C1766H2800N504O524S14	None	Complex		{}	{}	c	{'ComplexFormation', 'MetabolicReaction'}
EG12267-MONOMER	C2879H4477N779O813S25	None	Complex		{}	{}	im	{'ComplexFormation', 'MetabolicReaction'}
CITLY-CPLX	C25860H42030N7614O8022S180	None	Complex		{}	{}	c	{'ComplexFormation', 'MetabolicReaction'}
CPLX-154	C12137H19324N3139O3560S92	None	Complex		{}	{}	im	{'ComplexFormation', 'MetabolicReaction'}
Tsf_mono	C1331H2170N363O417S11	None	Complex		{}	{}	c	{'ComplexFormation', 'TranslationReaction'}
CPLX0-3661	C4508H7326N1248O1382S30	None	Complex		{}	{}	c	{'ComplexFormation', 'MetabolicReaction'}
CPLX-7	C4296H6792N1022O1088S26	None	Complex		{}	{}	im	{'ComplexFormation', 'MetabolicReaction'}
EG10122-MONOMER	C1296H2023N352O355S9	None	Complex		{}	{}	c	{'ComplexFormation', 'MetabolicReaction'}
CPLX0-7530	C5169H7818N1383O1659S27	None	Complex		{}	{}	om	{'ComplexFormation', 'MetabolicReaction'}
KDO-8PSYNTH-CPLX	C5508H8792N1484O1608S56	None	Complex		{}	{}	c	{'ComplexFormation', 'MetabolicReaction'}
UDPMANACATRANS-MONOMER	C1251H1993N358O352S8	None	Complex		{}	{}	c	{'ComplexFormation', 'MetabolicReaction'}
AMPG-MONOMER	C2498H3890N604O639S20	None	Complex		{}	{}	im	{'ComplexFormation', 'MetabolicReaction'}
EG12450-MONOMER	C1814H2966N522O552S15	None	Complex		{}	{}	c	{'ComplexFormation', 'MetabolicReaction'}
QueF_dim	C2890H4454N814O882S14	None	Complex		{}	{}	c	{'ComplexFormation', 'MetabolicReaction'}
PALMITOTRANS-MONOMER	C1600H2492N448O423S23	None	Complex		{}	{}	c	{'ComplexFormation', 'MetabolicReaction'}
EG10144-MONOMER	C2276H3581N601O650S19	None	Complex		{}	{}	c	{'ComplexFormation', 'MetabolicReaction'}
CHORISMUTPREPHENDEHYDRAT-CPLX	C3826H6122N1072O1144S24	None	Complex		{}	{}	c	{'ComplexFormation', 'MetabolicReaction'}
CPLX0-7533	C5385H7992N1446O1731S12	None	Complex		{}	{}	om	{'ComplexFormation', 'MetabolicReaction'}
DEHYDDEOXGALACTKIN-MONOMER	C1380H2162N392O419S13	None	Complex		{}	{}	c	{'ComplexFormation', 'MetabolicReaction'}
RluA_mono	C1103H1740N313O314S10	None	Complex		{}	{}	c	{'tRNAChargingReaction', 'ComplexFormation'}
CPLX0-7655	C6663H9813N1803O2049S54	None	Complex		{}	{}	om	{'ComplexFormation', 'MetabolicReaction'}
RpmC_mono	C313H544N99O95S2	None	Complex		{}	{}	c	{'ComplexFormation'}
COBALADENOSYLTRANS-MONOMER	C964H1528N282O294S7	None	Complex		{}	{}	c	{'ComplexFormation', 'MetabolicReaction'}
RPOA-MONOMER	C1926H2998N545O573S12	None	Complex		{}	{}	im	{'ComplexFormation', 'MetabolicReaction'}
DIHYDROPICRED-CPLX	C5008H8012N1456O1560S44	None	Complex		{}	{}	c	{'ComplexFormation', 'MetabolicReaction'}
CPLX0-1962	C4796H7572N1368O1456S40	None	Complex		{}	{}	c	{'ComplexFormation', 'MetabolicReaction'}
TufB_mono	C1918H3052N523O582S13	None	Complex		{}	{}	c	{'GenericFormationReaction', 'ComplexFormation'}
RpoN_mono	C2365H3759N649O766S13	None	Complex		{}	{}	c	{'ComplexFormation'}
ENTF-MONOMER	C6367H9906N1735O1869S40	None	Complex		{}	{}	c	{'ComplexFormation', 'MetabolicReaction'}
NusG_mono	C908H1430N255O266S7	None	Complex		{}	{}	c	{'TranscriptionReaction', 'ComplexFormation'}
EG12394-MONOMER	C667H1003N191O210S8	None	Complex		{}	{}	c	{'ComplexFormation', 'MetabolicReaction'}
G6700-MONOMER	C1819H2673N489O595S9	None	Complex		{}	{}	om	{'ComplexFormation', 'MetabolicReaction'}
G7921-MONOMER	C1253H1866N345O371S6	None	Complex		{}	{}	om	{'ComplexFormation', 'MetabolicReaction'}
G6520-MONOMER	C1288H2013N361O372S12	None	Complex		{}	{}	c	{'ComplexFormation', 'MetabolicReaction'}
CPLX-166	C12119H19510N3235O3640S104	None	Complex		{}	{}	im	{'ComplexFormation', 'MetabolicReaction'}
TruA_dim	C2720H4222N782O772S18	None	Complex		{}	{}	c	{'tRNAChargingReaction', 'ComplexFormation'}
CHORISMUTPREPHENDEHYDROG-CPLX	C3770H5974N1044O1078S28	None	Complex		{}	{}	c	{'ComplexFormation', 'MetabolicReaction'}
RplJ_mono	C776H1283N220O231S6	None	Complex		{}	{}	c	{'ComplexFormation'}
G7457-MONOMER	C1863H2872N509O530P0S12	None	Complex		{}	{}	om	{'ComplexFormation', 'MetabolicReaction'}
ACETOLACTSYNIII-CPLX	C7174H11478N1988O2138S66	None	Complex		{}	{}	c	{'ComplexFormation', 'MetabolicReaction'}
ASPKINIIHOMOSERDEHYDROGII-CPLX	C7854H12400N2244O2378S36	None	Complex		{}	{}	c	{'ComplexFormation', 'MetabolicReaction'}
ANSP-MONOMER	C2532H3913N621O651S24	None	Complex		{}	{}	im	{'ComplexFormation', 'MetabolicReaction'}
RplV_mono	C532H923N166O156S3	None	Complex		{}	{}	c	{'ComplexFormation'}
TREHALOSE6PSYN-MONOMER	C2427H3757N661O691S7	None	Complex		{}	{}	c	{'ComplexFormation', 'MetabolicReaction'}
NARK-MONOMER	C2318H3566N571O600S21	None	Complex		{}	{}	im	{'ComplexFormation', 'MetabolicReaction'}
GNTP-MONOMER	C2197H3539N523O566S25	None	Complex		{}	{}	im	{'ComplexFormation', 'MetabolicReaction'}
BTUE-MONOMER	C925H1436N232O273S9	None	Complex		{}	{}	c	{'ComplexFormation', 'MetabolicReaction'}
CPLX0-3951_G6561-MONOMER	C10953H17421N3005O3131S81	None	Complex		{}	{}	im	{'ComplexFormation', 'MetabolicReaction'}
RplN_mono	C593H1024N181O167S6	None	Complex		{}	{}	c	{'ComplexFormation'}
CPLX0-237	C7794H12390N2178O2310S72	None	Complex		{}	{}	c	{'ComplexFormation', 'MetabolicReaction'}
CPLX0-3641	C9056H14244N2464O2716S68	None	Complex		{}	{}	c	{'ComplexFormation', 'MetabolicReaction'}
CPLX0-7684	C1764H2790N442O461S18	None	Complex		{}	{}	im	{'ComplexFormation', 'MetabolicReaction'}
CPLX0-7718	C20052H31134N5592O5706S120	None	Complex		{}	{}	c	{'ComplexFormation', 'MetabolicReaction'}
EG12287-MONOMER	C1142H1739N312O339S9	None	Complex		{}	{}	c	{'ComplexFormation', 'MetabolicReaction'}
RpmF_mono	C269H461N94O80S	None	Complex		{}	{}	c	{'ComplexFormation'}
CPLX0-7641	C2966H4712N802O838S26	None	Complex		{}	{}	im	{'ComplexFormation', 'MetabolicReaction'}
PUTP-MONOMER	C2532H3925N628O653S23	None	Complex		{}	{}	im	{'ComplexFormation', 'MetabolicReaction'}
EG11595-MONOMER_EG11666-MONOMER	C2395H3842N708O714S22	None	Complex		{}	{}	c	{'ComplexFormation', 'MetabolicReaction'}
CPLX0-1667	C2046H3318N591O610S18	None	Complex		{}	{}	c	{'ComplexFormation', 'MetabolicReaction'}
UBIX-MONOMER_DHHB-METHYLTRANSFER-MONOMER	C2104H3355N586O613S18	None	Complex		{}	{}	c	{'ComplexFormation', 'MetabolicReaction'}
G6967-MONOMER	C1379H2177N377O406S14	None	Complex		{}	{}	c	{'ComplexFormation', 'MetabolicReaction'}
NACMURLALAAMI1-MONOMER	C1391H2296N412O407S4	None	Complex		{}	{}	p	{'ComplexFormation', 'MetabolicReaction'}
EG13236-MONOMER	C4443H6933N1225O1323S41	None	Complex		{}	{}	c	{'ComplexFormation', 'MetabolicReaction'}
CPLX0-761	C5711H9087N1615O1722S58	None	Complex		{}	{}	c	{'ComplexFormation', 'MetabolicReaction'}
YIDK-MONOMER	C2918H4570N701O741S24	None	Complex		{}	{}	im	{'ComplexFormation', 'MetabolicReaction'}
GlnS_mono	C2816H4358N787O839S21	None	Complex		{}	{}	c	{'tRNAChargingReaction', 'ComplexFormation'}
N-ACETYLTRANSFER-CPLX	C12966H20922N3738O3942S90	None	Complex		{}	{}	c	{'ComplexFormation', 'MetabolicReaction'}
RpmI_mono	C323H574N105O74S2	None	Complex		{}	{}	c	{'ComplexFormation'}
CPLX0-7532	C6177H9678N1536O1623S66	None	Complex		{}	{}	im	{'ComplexFormation', 'MetabolicReaction'}
2-ISOPROPYLMALATESYN-MONOMER	C2501H3990N714O782S18	None	Complex		{}	{}	c	{'ComplexFormation', 'MetabolicReaction'}
DnaK_mono	C2996H4864N842O987S15	None	Complex		{}	{}	c	{'ComplexFormation', 'TranslationReaction'}
EG11341-MONOMER	C1744H2746N470O499S14	None	Complex		{}	{}	c	{'ComplexFormation', 'MetabolicReaction'}
G7164-MONOMER	C729H1147N198O218S6	None	Complex		{}	{}	c	{'ComplexFormation', 'MetabolicReaction'}
TilS_mono	C2150H3406N625O615S11	None	Complex		{}	{}	c	{'tRNAChargingReaction', 'ComplexFormation'}
METNIQ-METHIONINE-ABC-CPLX	C5797H9396N1546O1700P0S36	None	Complex		{}	{}	im	{'ComplexFormation', 'MetabolicReaction'}
EG10341-MONOMER	C2840H4588N806O833S17	None	Complex		{}	{}	im	{'ComplexFormation', 'MetabolicReaction'}
GLUCOKIN-MONOMER	C1566H2460N423O445S12	None	Complex		{}	{}	c	{'ComplexFormation', 'MetabolicReaction'}
InfC_mono	C897H1507N263O267S6	None	Complex		{}	{}	c	{'ComplexFormation', 'TranslationReaction'}
ABC-53-CPLX	C7845H12610N2134O2283S56	None	Complex		{}	{}	m	{'ComplexFormation', 'MetabolicReaction'}
XASA-MONOMER	C2586H4054N611O665S23	None	Complex		{}	{}	im	{'ComplexFormation', 'MetabolicReaction'}
RIBF-MONOMER	C1551H2514N452O435S9	None	Complex		{}	{}	c	{'ComplexFormation', 'MetabolicReaction'}
RpsM_mono	C564H981N183O160S3	None	Complex		{}	{}	c	{'ComplexFormation'}
G7169-MONOMER	C1476H2307N432O418S10	None	Complex		{}	{}	c	{'ComplexFormation', 'MetabolicReaction'}
CYCA-MONOMER	C2433H3761N572O611S27	None	Complex		{}	{}	im	{'ComplexFormation', 'MetabolicReaction'}
RIBULOKIN-CPLX	C5422H8396N1506O1608S46	None	Complex		{}	{}	c	{'ComplexFormation', 'MetabolicReaction'}
YfiC_mono	C1204H1864N333O365S13	None	Complex		{}	{}	c	{'tRNAChargingReaction', 'ComplexFormation'}
GLUCOSE-1-PHOSPHAT-CPLX	C4064H6340N1082O1240S36	None	Complex		{}	{}	p	{'ComplexFormation', 'MetabolicReaction'}
SUCCARGDIHYDRO-MONOMER	C2171H3396N635O655S13	None	Complex		{}	{}	c	{'ComplexFormation', 'MetabolicReaction'}
MHPCHYDROL-MONOMER	C1421H2225N401O414S12	None	Complex		{}	{}	c	{'ComplexFormation', 'MetabolicReaction'}
B2975-MONOMER	C2778H4342N650O713S21	None	Complex		{}	{}	im	{'ComplexFormation', 'MetabolicReaction'}
MONOMER0-148	C1400H2206N384O406S6	None	Complex		{}	{}	c	{'ComplexFormation', 'MetabolicReaction'}
RpsC_mono	C1149H1913N346O323S4	None	Complex		{}	{}	c	{'ComplexFormation'}
ABC-19-CPLX	C7075H11381N1895O1956S37	None	Complex		{}	{}	m	{'ComplexFormation', 'MetabolicReaction'}
ORNCARBAMTRANSFERI-CPLX	C4890H7668N1320O1488S48	None	Complex		{}	{}	c	{'ComplexFormation', 'MetabolicReaction'}
ABC-6-CPLX	C11568H18452N3176O3250S60	None	Complex		{}	{}	im	{'ComplexFormation', 'MetabolicReaction'}
CPLX0-7642	C5082H7982N1254O1348S46	None	Complex		{}	{}	im	{'ComplexFormation', 'MetabolicReaction'}
CPLX0-3943	C2492H3920N702O732S18	None	Complex		{}	{}	c	{'ComplexFormation', 'MetabolicReaction'}
RpsE_mono	C761H1273N232O226S6	None	Complex		{}	{}	c	{'ComplexFormation'}
MHPDHYDROL-MONOMER	C1267H2023N365O387S10	None	Complex		{}	{}	c	{'ComplexFormation', 'MetabolicReaction'}
G7800-MONOMER	C1837H2844N507O514S12	None	Complex		{}	{}	c	{'ComplexFormation', 'MetabolicReaction'}
EG12134-MONOMER	C1460H2347N357O370S11	None	Complex		{}	{}	im	{'ComplexFormation', 'MetabolicReaction'}
FMNREDUCT-MONOMER	C1163H1818N323O343S9	None	Complex		{}	{}	c	{'ComplexFormation', 'MetabolicReaction'}
CARDIOLIPSYN-MONOMER	C2486H3930N668O670S29	None	Complex		{}	{}	im	{'ComplexFormation', 'MetabolicReaction'}
FecI_mono	C861H1374N231O260S7	None	Complex		{}	{}	c	{'ComplexFormation'}
ABC-16-CPLX	C9783H15416N2540O2742S66	None	Complex		{}	{}	m	{'ComplexFormation', 'MetabolicReaction'}
G7814-MONOMER	C1238H1810N326O361S5	None	Complex		{}	{}	om	{'ComplexFormation', 'MetabolicReaction'}
TrmJ_dim	C2370H3812N682O720S22	None	Complex		{}	{}	c	{'tRNAChargingReaction', 'ComplexFormation'}
CPLX0-1923_EG10155-MONOMER	C6296H9894N1732O1930S33	None	Complex		{}	{}	m	{'ComplexFormation', 'MetabolicReaction'}
ALDHDEHYDROG-MONOMER	C2370H3745N666O716S12	None	Complex		{}	{}	c	{'ComplexFormation', 'MetabolicReaction'}
YrdC_mono	C926H1464N254O276S6	None	Complex		{}	{}	c	{'tRNAChargingReaction', 'ComplexFormation'}
RsmC_mono	C1669H2608N467O497S10	None	Complex		{}	{}	c	{'ComplexFormation'}
EG11671-MONOMER	C2213H3444N535O564S30	None	Complex		{}	{}	im	{'ComplexFormation', 'MetabolicReaction'}
2-DEHYDROPANTOATE-REDUCT-MONOMER	C1497H2375N426O444S13	None	Complex		{}	{}	c	{'ComplexFormation', 'MetabolicReaction'}
ABC-46-CPLX	C8887H14520N2335O2473S71	None	Complex		{}	{}	m	{'ComplexFormation', 'MetabolicReaction'}
PTSI-MONOMER	C2799H4523N759O876S22	None	Complex		{}	{}	c	{'ComplexFormation', 'MetabolicReaction'}
CPLX0-3936	C4856H7696N1312O1480S24	None	Complex		{}	{}	c	{'ComplexFormation', 'MetabolicReaction'}
UDP-NACMURALGLDAPLIG-MONOMER	C2335H3689N672O711S20	None	Complex		{}	{}	c	{'ComplexFormation', 'MetabolicReaction'}
CPLX0-7888	C4102H6418N1098O1180S32	None	Complex		{}	{}	c	{'ComplexFormation', 'MetabolicReaction'}
CPLX-171	C2624H3998N712O766S30	None	Complex		{}	{}	c	{'ComplexFormation', 'MetabolicReaction'}
CPLX0-1943	C6812H10657N1885O2067S37	None	Complex		{}	{}	m	{'ComplexFormation', 'MetabolicReaction'}
HISTCYCLOPRATPPHOS	C1003H1587N274O313S8	None	Complex		{}	{}	c	{'ComplexFormation', 'MetabolicReaction'}
G7517-MONOMER	C2381H3764N675O708S20	None	Complex		{}	{}	c	{'ComplexFormation', 'MetabolicReaction'}
CMPKI-MONOMER	C1090H1773N318O328S5	None	Complex		{}	{}	c	{'ComplexFormation', 'MetabolicReaction'}
SPERMACTRAN-CPLX	C3932H6036N1076O1116S24	None	Complex		{}	{}	c	{'ComplexFormation', 'MetabolicReaction'}
YJIZ-MONOMER	C2260H3550N582O595S33	None	Complex		{}	{}	im	{'ComplexFormation', 'MetabolicReaction'}
YqcB_mono	C1319H2066N388O380S7	None	Complex		{}	{}	c	{'tRNAChargingReaction', 'ComplexFormation'}
EG11350-MONOMER	C1678H2631N428O476S10	None	Complex		{}	{}	c	{'ComplexFormation', 'MetabolicReaction'}
ABC-9-CPLX	C7150H11610N1965O1950S71	None	Complex		{}	{}	m	{'ComplexFormation', 'MetabolicReaction'}
FEOB-MONOMER	C3828H6053N987O1078S41	None	Complex		{}	{}	im	{'ComplexFormation', 'MetabolicReaction'}
RplF_mono	C832H1374N243O246S2	None	Complex		{}	{}	c	{'ComplexFormation'}
YggH_mono	C1215H1886N348O343S14	None	Complex		{}	{}	c	{'tRNAChargingReaction', 'ComplexFormation'}
XANTHOSINEPHOSPHORY-CPLX	C8022H12678N2136O2304S96	None	Complex		{}	{}	c	{'ComplexFormation', 'MetabolicReaction'}
G6576-MONOMER	C1472H2278N409O430S14	None	Complex		{}	{}	c	{'ComplexFormation', 'MetabolicReaction'}
CPLX0-7695	C2972H4720N830O870S32	None	Complex		{}	{}	c	{'ComplexFormation', 'MetabolicReaction'}
UDP-NACMURALGLDAPAALIG-MONOMER	C2090H3372N583O647S13	None	Complex		{}	{}	c	{'ComplexFormation', 'MetabolicReaction'}
NRDACTMULTI-CPLX	C9859H15425N2776O2944S81	None	Complex		{}	{}	c	{'ComplexFormation', 'MetabolicReaction'}
G6708-MONOMER	C3238H5148N907O961S26	None	Complex		{}	{}	c	{'ComplexFormation', 'MetabolicReaction'}
DTDPGLUCOSEPP2-MONOMER	C1485H2302N387O433S7	None	Complex		{}	{}	c	{'ComplexFormation', 'MetabolicReaction'}
PAPSSULFOTRANS-CPLX	C2516H3906N682O736S6	None	Complex		{}	{}	c	{'ComplexFormation', 'MetabolicReaction'}
YICE-MONOMER	C2231H3611N562O612S24	None	Complex		{}	{}	im	{'ComplexFormation', 'MetabolicReaction'}
RpsQ_mono	C425H716N124O120S3	None	Complex		{}	{}	c	{'ComplexFormation'}
EG11985-MONOMER	C2004H3100N496O546S10	None	Complex		{}	{}	c	{'ComplexFormation', 'MetabolicReaction'}
ABC-59-CPLX	C8906H14096N2423O2516S72	None	Complex		{}	{}	m	{'ComplexFormation', 'MetabolicReaction'}
EG11352-MONOMER	C1823H2744N460O500S10	None	Complex		{}	{}	c	{'ComplexFormation', 'MetabolicReaction'}
RplP_mono	C686H1158N205O177S6	None	Complex		{}	{}	c	{'ComplexFormation'}
DIAMINOPIMEPIM-MONOMER	C1333H2093N384O389S15	None	Complex		{}	{}	c	{'ComplexFormation', 'MetabolicReaction'}
DEHYDDEOXPHOSGALACT-ALDOL-MONOMER	C959H1518N256O283S7	None	Complex		{}	{}	c	{'ComplexFormation', 'MetabolicReaction'}
EG12310-MONOMER	C2038H3198N574O624S14	None	Complex		{}	{}	c	{'ComplexFormation', 'MetabolicReaction'}
NACMURLALAAMI2-MONOMER	C2099H3396N619O652S8	None	Complex		{}	{}	p	{'ComplexFormation', 'MetabolicReaction'}
PPK-CPLX	C14484H22896N4032O4104S64	None	Complex		{}	{}	c	{'ComplexFormation', 'MetabolicReaction'}
ABC-64-CPLX	C6895H11076N1825O1877S29	None	Complex		{}	{}	m	{'ComplexFormation', 'MetabolicReaction'}
ASPCARBCAT-TRIMER	C4581H7266N1269O1368S27	None	Complex		{}	{}	c	{'ComplexFormation', 'MetabolicReaction'}
CPLX0-224	C1930H3036N526O552S2	None	Complex		{}	{}	c	{'ComplexFormation', 'MetabolicReaction'}
Sra_mono	C214H378N76O66S	None	Complex		{}	{}	c	{'ComplexFormation'}
FOCB-MONOMER	C1400H2208N356O357S26	None	Complex		{}	{}	im	{'ComplexFormation', 'MetabolicReaction'}
G6502-MONOMER	C454H723N132O134S4	None	Complex		{}	{}	c	{'ComplexFormation', 'MetabolicReaction'}
RpoD_mono	C3042H4868N856O993S28	None	Complex		{}	{}	c	{'ComplexFormation'}
CPLX0-1924	C6088H9472N1652O1854S26	None	Complex		{}	{}	m	{'ComplexFormation', 'MetabolicReaction'}
EG10374-MONOMER	C2741H4312N734O852S18	None	Complex		{}	{}	p	{'ComplexFormation', 'MetabolicReaction'}
G6246-MONOMER	C1349H2097N372O391S18	None	Complex		{}	{}	c	{'ComplexFormation', 'MetabolicReaction'}
THIC-MONOMER	C3126H4869N886O938S30	None	Complex		{}	{}	c	{'ComplexFormation', 'MetabolicReaction'}
RsuA_mono	C1145H1801N328O344S6	None	Complex		{}	{}	c	{'ComplexFormation'}
G6657-MONOMER	C1567H2228N411O482S11	None	Complex		{}	{}	om	{'ComplexFormation', 'MetabolicReaction'}
LeuS_mono	C4339H6689N1159O1292S45	None	Complex		{}	{}	c	{'tRNAChargingReaction', 'ComplexFormation'}
ASPKINIHOMOSERDEHYDROGI-CPLX	C15760H25224N4368O4752S140	None	Complex		{}	{}	c	{'ComplexFormation', 'MetabolicReaction'}
YHFM-MONOMER	C2225H3480N526O580S22	None	Complex		{}	{}	im	{'ComplexFormation', 'MetabolicReaction'}
RFFTRANS-MONOMER	C1875H2917N505O547S19	None	Complex		{}	{}	c	{'ComplexFormation', 'MetabolicReaction'}
YADQ-MONOMER	C2316H3704N599O609S21	None	Complex		{}	{}	im	{'ComplexFormation', 'MetabolicReaction'}
LACY-MONOMER	C2223H3336N506O541S22	None	Complex		{}	{}	im	{'ComplexFormation', 'MetabolicReaction'}
EG11674-MONOMER	C1038H1624N263O256S10	None	Complex		{}	{}	im	{'ComplexFormation', 'MetabolicReaction'}
YIDT-MONOMER	C2221H3407N537O555S18	None	Complex		{}	{}	im	{'ComplexFormation', 'MetabolicReaction'}
CPLX0-1261	C3267H5040N898O968S20	None	Complex		{}	{}	c	{'ComplexFormation', 'MetabolicReaction'}
SAICARSYN-CPLX	C3600H5706N960O1086S36	None	Complex		{}	{}	c	{'ComplexFormation', 'MetabolicReaction'}
GLUTRACE-CPLX	C2790H4444N740O808S22	None	Complex		{}	{}	c	{'ComplexFormation', 'MetabolicReaction'}
cisGroES_hepta	C3178H5341N889O1015S14	None	Complex		{}	{}	c	{'ComplexFormation', 'TranslationReaction'}
YheLMN_cplx	C3360H5256N908O994S16	None	Complex		{}	{}	c	{'tRNAChargingReaction', 'ComplexFormation'}
TatA_MONOMER	C423H695N115O138S2	None	Complex		{}	{}	im	{'PostTranslationReaction', 'ComplexFormation'}
TatE_MONOMER	C313H535N84O93S2	None	Complex		{}	{}	im	{'PostTranslationReaction', 'ComplexFormation'}
TatBC_octa	C17320H27192N4248O4904S120	None	Complex		{}	{}	im	{'PostTranslationReaction', 'ComplexFormation'}
SecA_MONOMER	C4468H7138N1277O1379S37	None	Complex		{}	{}	c	{'PostTranslationReaction', 'ComplexFormation'}
SecB_tetra	C3048H4612N792O972S36	None	Complex		{}	{}	c	{'PostTranslationReaction', 'ComplexFormation'}
SRP-CPLX	C3258H4875N1059O1439P114S29	None	Complex		{}	{}	c	{'PostTranslationReaction', 'ComplexFormation'}
Sec-CPLX	C7955H12880N2101O2234S58	None	Complex		{}	{}	im	{'PostTranslationReaction', 'ComplexFormation'}
LolA_MONOMER	C996H1536N276O312S4	None	Complex		{}	{}	p	{'PostTranslationReaction', 'ComplexFormation'}
LolB_MONOMER	C1103H1755N292O317P0S7	None	Complex		{}	{}	om	{'PostTranslationReaction', 'ComplexFormation'}
LolCDE-CPLX	C7052H11423N1915O2002S66	None	Complex		{}	{}	im	{'PostTranslationReaction', 'ComplexFormation'}
Bam-CPLX	C9493H14815N2525O2924P0S52	None	Complex		{}	{}	om	{'PostTranslationReaction', 'ComplexFormation'}
YidC_MONOMER	C2805H4331N715O795S23	None	Complex		{}	{}	im	{'PostTranslationReaction', 'ComplexFormation'}
SurA_MONOMER	C2054H3333N608O639S16	None	Complex		{}	{}	p	{'PostTranslationReaction', 'ComplexFormation'}
Lgt_MONOMER	C1569H2349N387O381S12	None	Complex		{}	{}	im	{'PostTranslationReaction', 'ComplexFormation'}
LspA_MONOMER	C853H1300N211O216S6	None	Complex		{}	{}	im	{'PostTranslationReaction', 'ComplexFormation'}
FtsY_MONOMER	C2404H3807N638O785S8	None	Complex		{}	{}	c	{'PostTranslationReaction', 'ComplexFormation'}
ACETYL-COA-CARBOXYLMULTI-CPLX_mod_btn	C11860H19127N3312O3541S135	None	Complex		{}	{}	c	{'ComplexFormation', 'MetabolicReaction'}
ACETOLACTSYNI-CPLX_mod_mg2_mod_fad_mod_thmpp	C6363H10107MgN1765O1904P4S73	None	Complex		{}	{}	c	{'ComplexFormation', 'MetabolicReaction'}
PABASYN-CPLX_mod_mg2	C3197H4963MgN884O952S22	None	Complex		{}	{}	c	{'ComplexFormation', 'MetabolicReaction'}
2OXOGLUTARATEDEH-CPLX_mod_mg2_mod_lipo	C106602H169273MgN30078O32425S738	None	Complex		{}	{}	c	{'ComplexFormation', 'MetabolicReaction'}
ANTHRANSYN-CPLX_mod_mg2	C10062H16008MgN2858O3048S82	None	Complex		{}	{}	c	{'ComplexFormation', 'MetabolicReaction'}
ANTHRANSYN-CPLX_mod_cobalt2	C10062CoH16008N2858O3048S82	None	Complex		{}	{}	c	{'ComplexFormation', 'MetabolicReaction'}
ANTHRANSYN-CPLX_mod_fe2	C10062FeH16008N2858O3048S82	None	Complex		{}	{}	c	{'ComplexFormation', 'MetabolicReaction'}
ASPCARBTRANS-CPLX_mod_zn2	C13644H21816N3810O4110S84Zn	None	Complex		{}	{}	c	{'ComplexFormation', 'MetabolicReaction'}
ATPSYN-CPLX_mod_mg2	C23622H38061MgN6332O6983S215	None	Complex		{}	{}	im	{'ComplexFormation', 'MetabolicReaction'}
CARBPSYN-CPLX_mod_mg2	C14048H22388MgN3904O4294S110	None	Complex		{}	{}	c	{'ComplexFormation', 'MetabolicReaction'}
CARBPSYN-CPLX_mod_mn2	C14048H22388MnN3904O4294S110	None	Complex		{}	{}	c	{'ComplexFormation', 'MetabolicReaction'}
CARBPSYN-CPLX_mod_cobalt2	C14048CoH22388N3904O4294S110	None	Complex		{}	{}	c	{'ComplexFormation', 'MetabolicReaction'}
CARBPSYN-CPLX_mod_cd2	C14048CdH22388N3904O4294S110	None	Complex		{}	{}	c	{'ComplexFormation', 'MetabolicReaction'}
CARBPSYN-CPLX_mod_zn2	C14048H22388N3904O4294S110Zn	None	Complex		{}	{}	c	{'ComplexFormation', 'MetabolicReaction'}
APP-UBIOX-CPLX_mod_pheme_mod_hemed	C4781Fe2H7246N1155O1191S48	None	Complex		{}	{}	im	{'ComplexFormation', 'MetabolicReaction'}
CYT-D-UBIOX-CPLX_mod_pheme_mod_hemed	C4756Fe2H7226N1152O1235S47	None	Complex		{}	{}	im	{'ComplexFormation', 'MetabolicReaction'}
DIMESULFREDUCT-CPLX_mod_bmocogdp	C6454H10073MoN1765O1890P4S84	None	Complex		{}	{}	m	{'ComplexFormation', 'MetabolicReaction'}
ETHAMLY-CPLX_mod_adocbl	C21354CoH34270N5970O6659PS228	None	Complex		{}	{}	c	{'ComplexFormation', 'MetabolicReaction'}
SULFITE-REDUCT-CPLX_mod_4fe4s_mod_sheme_mod_fmn_mod_fad	C35070Fe5H54854N9721O10560P3S152	None	Complex		{}	{}	c	{'ComplexFormation', 'MetabolicReaction'}
FORMATEDEHYDROGO-CPLX_mod_bmocogdp	C7694H11787MoN2095O2220P4S75Se	None	Complex		{}	{}	m	{'ComplexFormation', 'MetabolicReaction'}
FORMATEDEHYDROGN-CPLX_mod_bmocogdp	C22927H35315MoN6281O6639P4S241Se3	None	Complex		{}	{}	m	{'ComplexFormation', 'MetabolicReaction'}
HYDROG3-CPLX_mod_ni2	C10476H16603N2803NiO2901S126	None	Complex		{}	{}	im	{'ComplexFormation', 'MetabolicReaction'}
FUMARATE-REDUCTASE_mod_1:pheme_mod_3fe4s_mod_4fe4s_mod_fad_mod_2fe2s	C5479Fe10H8503N1490O1566P2S70	None	Complex		{}	{}	im	{'ComplexFormation', 'MetabolicReaction'}
ANGLYC3PDEHYDROG-CPLX_mod_fmn	C6553H10526N1883O1946PS63	None	Complex		{}	{}	c	{'ComplexFormation', 'MetabolicReaction'}
GLUTAMATESYN-CPLX_mod_fe2_mod_fad	C38115FeH60111N10737O11419P2S308	None	Complex		{}	{}	c	{'ComplexFormation', 'MetabolicReaction'}
FORMHYDROGI-CPLX_mod_ni2_mod_4fe4s	C6045Fe4H9248N1644NiO1712S72	None	Complex		{}	{}	m	{'ComplexFormation', 'MetabolicReaction'}
FORMHYDROG2-CPLX_mod_ni2_mod_fe2	C8167FeH12723N2192NiO2339S80	None	Complex		{}	{}	m	{'ComplexFormation', 'MetabolicReaction'}
NADH-DHI-CPLX_mod_2fe2s_mod_4fe4s_mod_fmn	C24668Fe6H38311N6419O6749PS248	None	Complex		{}	{}	im	{'ComplexFormation', 'MetabolicReaction'}
NITRITREDUCT-CPLX_mod_2fe2s_mod_fad_mod_sheme	C8829Fe3H13951N2455O2682P2S85	None	Complex		{}	{}	c	{'ComplexFormation', 'MetabolicReaction'}
PYRUVATEDEH-CPLX_mod_mg2_mod_fad_mod_thmpp_mod_lipo	C203843H322078MgN55417O61895P4S1227	None	Complex		{}	{}	c	{'ComplexFormation', 'MetabolicReaction'}
Phe_RS_tetra_mod_mg2	C10996H17506MgN3096O3302S76	None	Complex		{}	{}	c	{'tRNAChargingReaction', 'ComplexFormation'}
SUCC-DEHASE_mod_3fe4s_mod_fad_mod_2fe2s_mod_4fe4s	C5304Fe9H8344N1463O1538P2S68	None	Complex		{}	{}	im	{'ComplexFormation', 'MetabolicReaction'}
LTARTDEHYDRA-CPLX_mod_4fe4s	C4902Fe4H7882N1354O1456S58	None	Complex		{}	{}	c	{'ComplexFormation', 'MetabolicReaction'}
TMAOREDUCTI-CPLX_mod_bmocogdp	C10379H16046MoN2949O3067P4S83	None	Complex		{}	{}	m	{'ComplexFormation', 'MetabolicReaction'}
TRYPSYN_mod_pydx5p	C6372H10076N1741O1908PS54	None	Complex		{}	{}	c	{'ComplexFormation', 'MetabolicReaction'}
CPLX0-1762_mod_fad_mod_2fe2s	C5040Fe2H7858N1431O1519P2S50	None	Complex		{}	{}	c	{'ComplexFormation', 'MetabolicReaction'}
AAS-MONOMER_mod_mg2	C3661H5821MgN990O1009S27	None	Complex		{}	{}	im	{'ComplexFormation', 'MetabolicReaction'}
CPLX0-1_mod_fad	C9619H14751N2637O2947P2S96	None	Complex		{}	{}	c	{'ComplexFormation', 'MetabolicReaction'}
RIBONUCLEOSIDE-DIP-REDUCTI-CPLX_mod_mg2_mod_fe2	C11546FeH17854MgN3082O3490S80	None	Complex		{}	{}	c	{'ComplexFormation', 'MetabolicReaction'}
CPLX0-301_mod_mn2	C15030H23328MnN3996O4356S120	None	Complex		{}	{}	c	{'ComplexFormation', 'MetabolicReaction'}
PHOSGLYCMUTASE_mod_23bpg	C2573H3993N690O770P2S4	None	Complex		{}	{}	c	{'ComplexFormation', 'MetabolicReaction'}
PPPGPPHYDRO-CPLX_mod_nh4_mod_mg2	C4850H7822MgN1393O1430S38	None	Complex		{}	{}	c	{'ComplexFormation', 'MetabolicReaction'}
CPLX0-7630_mod_ca2	C4296CaH6632N1164O1188S28	None	Complex		{}	{}	p	{'ComplexFormation', 'MetabolicReaction'}
ALPHA-AMYL-PERI-MONOMER_mod_ca2	C3400CaH5076N918O1013S21	None	Complex		{}	{}	p	{'ComplexFormation', 'MetabolicReaction'}
G6437-MONOMER_mod_ca2_mod_pqq	C1862CaH2845N512O545S8	None	Complex		{}	{}	p	{'ComplexFormation', 'MetabolicReaction'}
GLYCPDIESTER-PERI-CPLX_mod_ca2	C3662CaH5616N954O1102S32	None	Complex		{}	{}	p	{'ComplexFormation', 'MetabolicReaction'}
DIACYLGLYKIN-CPLX_mod_cd2_mod_zn2_mod_mg2_mod_mn2_mod_cobalt2	C1800CdCoH2883MgMnN468O486S15Zn	None	Complex		{}	{}	im	{'ComplexFormation', 'MetabolicReaction'}
AROB-MONOMER_mod_cobalt2_mod_nad	C1750CoH2817N481O525P2S15	None	Complex		{}	{}	c	{'ComplexFormation', 'MetabolicReaction'}
EG11817-MONOMER_mod_cobalt2	C1177CoH1868N340O364S9	None	Complex		{}	{}	c	{'ComplexFormation', 'MetabolicReaction'}
EG11957-MONOMER_mod_cobalt2	C1175CoH1828N305O339S14	None	Complex		{}	{}	c	{'ComplexFormation', 'MetabolicReaction'}
CPLX0-7625_mod_cobalt2	C2026CoH3192N548O600S18	None	Complex		{}	{}	c	{'ComplexFormation', 'MetabolicReaction'}
CPLX0-7622_mod_4fe4s	C4254Fe4H6788N1196O1288S58	None	Complex		{}	{}	c	{'ComplexFormation', 'MetabolicReaction'}
LSERINEDEAM1-MONOMER_mod_4fe4s	C2139Fe4H3365N595O661S32	None	Complex		{}	{}	c	{'ComplexFormation', 'MetabolicReaction'}
LSERINEDEAM2-MONOMER_mod_4fe4s	C2127Fe4H3412N597O654S33	None	Complex		{}	{}	c	{'ComplexFormation', 'MetabolicReaction'}
G6886-MONOMER_mod_cu2	C765CuH1240N221O247S6	None	Complex		{}	{}	p	{'ComplexFormation', 'MetabolicReaction'}
METHYLENETHFREDUCT-CPLX_mod_fad	C5911H9263N1645O1763P2S48	None	Complex		{}	{}	c	{'ComplexFormation', 'MetabolicReaction'}
UDHA-CPLX_mod_fad	C18187H28343N5169O5487P2S152	None	Complex		{}	{}	c	{'ComplexFormation', 'MetabolicReaction'}
ADHE-CPLX_mod_fe2	C171440FeH272760N46160O51360S1160	None	Complex		{}	{}	c	{'ComplexFormation', 'MetabolicReaction'}
AROF-CPLX_mod_2:fe2	C3362Fe2H5382N976O1060S36	None	Complex		{}	{}	c	{'ComplexFormation', 'MetabolicReaction'}
AROG-CPLX_mod_fe2	C6688FeH10744N1896O2024S60	None	Complex		{}	{}	c	{'ComplexFormation', 'MetabolicReaction'}
GALACTARDEHYDRA-MONOMER_mod_fe2	C2511FeH3990N683O754S18	None	Complex		{}	{}	c	{'ComplexFormation', 'MetabolicReaction'}
GALACTURIDYLYLTRANS-CPLX_mod_fe2_mod_zn2	C3544FeH5360N990O1034S28Zn	None	Complex		{}	{}	c	{'ComplexFormation', 'MetabolicReaction'}
CPLX0-227_mod_fe2	C2916FeH4450N828O836S2	None	Complex		{}	{}	c	{'ComplexFormation', 'MetabolicReaction'}
LACTALDREDUCT-CPLX_mod_fe2	C3590FeH5688N986O1082S32	None	Complex		{}	{}	c	{'ComplexFormation', 'MetabolicReaction'}
SUPEROX-DISMUTFE-CPLX_mod_fe3	C1942FeH2846N498O564S2	None	Complex		{}	{}	c	{'ComplexFormation', 'MetabolicReaction'}
AROC-CPLX_mod_fmnh2	C6837H10965N1988O2117PS48	None	Complex		{}	{}	c	{'ComplexFormation', 'MetabolicReaction'}
AROC-CPLX_mod_fadh2	C6847H10977N1993O2123P2S48	None	Complex		{}	{}	c	{'ComplexFormation', 'MetabolicReaction'}
CFA-CPLX_mod_hco3	C3931H5971N1068O1133S40	None	Complex		{}	{}	c	{'ComplexFormation', 'MetabolicReaction'}
CPLX0-7882_mod_hco3	C8323H13015N2358O2493S120	None	Complex		{}	{}	c	{'ComplexFormation', 'MetabolicReaction'}
RHAMNULPALDOL-CPLX_mod_k_mod_zn2	C5432H8392KN1444O1576S44Zn	None	Complex		{}	{}	c	{'ComplexFormation', 'MetabolicReaction'}
S-ADENMETSYN-CPLX_mod_4:k_mod_1:mg2	C7424H11632K4MgN2012O2280S52	None	Complex		{}	{}	c	{'ComplexFormation', 'MetabolicReaction'}
S-ADENMETSYN-CPLX_mod_4:k_mod_1:mn2	C7424H11632K4MnN2012O2280S52	None	Complex		{}	{}	c	{'ComplexFormation', 'MetabolicReaction'}
S-ADENMETSYN-CPLX_mod_4:k_mod_1:cobalt2	C7424CoH11632K4N2012O2280S52	None	Complex		{}	{}	c	{'ComplexFormation', 'MetabolicReaction'}
S-ADENMETSYN-CPLX_mod_4:k_mod_1:zn2	C7424H11632K4N2012O2280S52Zn	None	Complex		{}	{}	c	{'ComplexFormation', 'MetabolicReaction'}
S-ADENMETSYN-CPLX_mod_4:k_mod_1:cd2	C7424CdH11632K4N2012O2280S52	None	Complex		{}	{}	c	{'ComplexFormation', 'MetabolicReaction'}
S-ADENMETSYN-CPLX_mod_4:k_mod_1:ni2	C7424H11632K4N2012NiO2280S52	None	Complex		{}	{}	c	{'ComplexFormation', 'MetabolicReaction'}
S-ADENMETSYN-CPLX_mod_4:k_mod_1:ca2	C7424CaH11632K4N2012O2280S52	None	Complex		{}	{}	c	{'ComplexFormation', 'MetabolicReaction'}
S-ADENMETSYN-CPLX_mod_4:nh4_mod_1:mg2	C7424H11648MgN2016O2280S52	None	Complex		{}	{}	c	{'ComplexFormation', 'MetabolicReaction'}
S-ADENMETSYN-CPLX_mod_4:nh4_mod_1:mn2	C7424H11648MnN2016O2280S52	None	Complex		{}	{}	c	{'ComplexFormation', 'MetabolicReaction'}
S-ADENMETSYN-CPLX_mod_4:nh4_mod_1:cobalt2	C7424CoH11648N2016O2280S52	None	Complex		{}	{}	c	{'ComplexFormation', 'MetabolicReaction'}
S-ADENMETSYN-CPLX_mod_4:nh4_mod_1:zn2	C7424H11648N2016O2280S52Zn	None	Complex		{}	{}	c	{'ComplexFormation', 'MetabolicReaction'}
S-ADENMETSYN-CPLX_mod_4:nh4_mod_1:cd2	C7424CdH11648N2016O2280S52	None	Complex		{}	{}	c	{'ComplexFormation', 'MetabolicReaction'}
S-ADENMETSYN-CPLX_mod_4:nh4_mod_1:ni2	C7424H11648N2016NiO2280S52	None	Complex		{}	{}	c	{'ComplexFormation', 'MetabolicReaction'}
S-ADENMETSYN-CPLX_mod_4:nh4_mod_1:ca2	C7424CaH11648N2016O2280S52	None	Complex		{}	{}	c	{'ComplexFormation', 'MetabolicReaction'}
S-ADENMETSYN-CPLX_mod_4:tl_mod_1:mg2	C7424H11632MgN2012O2280S52Tl4	None	Complex		{}	{}	c	{'ComplexFormation', 'MetabolicReaction'}
S-ADENMETSYN-CPLX_mod_4:tl_mod_1:mn2	C7424H11632MnN2012O2280S52Tl4	None	Complex		{}	{}	c	{'ComplexFormation', 'MetabolicReaction'}
S-ADENMETSYN-CPLX_mod_4:tl_mod_1:cobalt2	C7424CoH11632N2012O2280S52Tl4	None	Complex		{}	{}	c	{'ComplexFormation', 'MetabolicReaction'}
S-ADENMETSYN-CPLX_mod_4:tl_mod_1:zn2	C7424H11632N2012O2280S52Tl4Zn	None	Complex		{}	{}	c	{'ComplexFormation', 'MetabolicReaction'}
S-ADENMETSYN-CPLX_mod_4:tl_mod_1:cd2	C7424CdH11632N2012O2280S52Tl4	None	Complex		{}	{}	c	{'ComplexFormation', 'MetabolicReaction'}
S-ADENMETSYN-CPLX_mod_4:tl_mod_1:ni2	C7424H11632N2012NiO2280S52Tl4	None	Complex		{}	{}	c	{'ComplexFormation', 'MetabolicReaction'}
S-ADENMETSYN-CPLX_mod_4:tl_mod_1:ca2	C7424CaH11632N2012O2280S52Tl4	None	Complex		{}	{}	c	{'ComplexFormation', 'MetabolicReaction'}
S-ADENMETSYN-CPLX_mod_4:cs_mod_1:mg2	C7424Cs4H11632MgN2012O2280S52	None	Complex		{}	{}	c	{'ComplexFormation', 'MetabolicReaction'}
S-ADENMETSYN-CPLX_mod_4:cs_mod_1:mn2	C7424Cs4H11632MnN2012O2280S52	None	Complex		{}	{}	c	{'ComplexFormation', 'MetabolicReaction'}
S-ADENMETSYN-CPLX_mod_4:cs_mod_1:cobalt2	C7424CoCs4H11632N2012O2280S52	None	Complex		{}	{}	c	{'ComplexFormation', 'MetabolicReaction'}
S-ADENMETSYN-CPLX_mod_4:cs_mod_1:zn2	C7424Cs4H11632N2012O2280S52Zn	None	Complex		{}	{}	c	{'ComplexFormation', 'MetabolicReaction'}
S-ADENMETSYN-CPLX_mod_4:cs_mod_1:cd2	C7424CdCs4H11632N2012O2280S52	None	Complex		{}	{}	c	{'ComplexFormation', 'MetabolicReaction'}
S-ADENMETSYN-CPLX_mod_4:cs_mod_1:ni2	C7424Cs4H11632N2012NiO2280S52	None	Complex		{}	{}	c	{'ComplexFormation', 'MetabolicReaction'}
S-ADENMETSYN-CPLX_mod_4:cs_mod_1:ca2	C7424CaCs4H11632N2012O2280S52	None	Complex		{}	{}	c	{'ComplexFormation', 'MetabolicReaction'}
S-ADENMETSYN-CPLX_mod_4:LI_mod_1:mg2	C7424H11632Li4MgN2012O2280S52	None	Complex		{}	{}	c	{'ComplexFormation', 'MetabolicReaction'}
S-ADENMETSYN-CPLX_mod_4:LI_mod_1:mn2	C7424H11632Li4MnN2012O2280S52	None	Complex		{}	{}	c	{'ComplexFormation', 'MetabolicReaction'}
S-ADENMETSYN-CPLX_mod_4:LI_mod_1:cobalt2	C7424CoH11632Li4N2012O2280S52	None	Complex		{}	{}	c	{'ComplexFormation', 'MetabolicReaction'}
S-ADENMETSYN-CPLX_mod_4:LI_mod_1:zn2	C7424H11632Li4N2012O2280S52Zn	None	Complex		{}	{}	c	{'ComplexFormation', 'MetabolicReaction'}
S-ADENMETSYN-CPLX_mod_4:LI_mod_1:cd2	C7424CdH11632Li4N2012O2280S52	None	Complex		{}	{}	c	{'ComplexFormation', 'MetabolicReaction'}
S-ADENMETSYN-CPLX_mod_4:LI_mod_1:ni2	C7424H11632Li4N2012NiO2280S52	None	Complex		{}	{}	c	{'ComplexFormation', 'MetabolicReaction'}
S-ADENMETSYN-CPLX_mod_4:LI_mod_1:ca2	C7424CaH11632Li4N2012O2280S52	None	Complex		{}	{}	c	{'ComplexFormation', 'MetabolicReaction'}
S-ADENMETSYN-CPLX_mod_4:na1_mod_1:mg2	C7424H11632MgN2012Na4O2280S52	None	Complex		{}	{}	c	{'ComplexFormation', 'MetabolicReaction'}
S-ADENMETSYN-CPLX_mod_4:na1_mod_1:mn2	C7424H11632MnN2012Na4O2280S52	None	Complex		{}	{}	c	{'ComplexFormation', 'MetabolicReaction'}
S-ADENMETSYN-CPLX_mod_4:na1_mod_1:cobalt2	C7424CoH11632N2012Na4O2280S52	None	Complex		{}	{}	c	{'ComplexFormation', 'MetabolicReaction'}
S-ADENMETSYN-CPLX_mod_4:na1_mod_1:zn2	C7424H11632N2012Na4O2280S52Zn	None	Complex		{}	{}	c	{'ComplexFormation', 'MetabolicReaction'}
S-ADENMETSYN-CPLX_mod_4:na1_mod_1:cd2	C7424CdH11632N2012Na4O2280S52	None	Complex		{}	{}	c	{'ComplexFormation', 'MetabolicReaction'}
S-ADENMETSYN-CPLX_mod_4:na1_mod_1:ni2	C7424H11632N2012Na4NiO2280S52	None	Complex		{}	{}	c	{'ComplexFormation', 'MetabolicReaction'}
S-ADENMETSYN-CPLX_mod_4:na1_mod_1:ca2	C7424CaH11632N2012Na4O2280S52	None	Complex		{}	{}	c	{'ComplexFormation', 'MetabolicReaction'}
PKI-COMPLEX_mod_mg2_mod_k	C8828H14572KMgN2476O2776S96	None	Complex		{}	{}	c	{'ComplexFormation', 'MetabolicReaction'}
PKI-COMPLEX_mod_mn2_mod_k	C8828H14572KMnN2476O2776S96	None	Complex		{}	{}	c	{'ComplexFormation', 'MetabolicReaction'}
PKII-CPLX_mod_mg2_mod_k	C8880H14728KMgN2572O2776S92	None	Complex		{}	{}	c	{'ComplexFormation', 'MetabolicReaction'}
PKII-CPLX_mod_mn2_mod_k	C8880H14728KMnN2572O2776S92	None	Complex		{}	{}	c	{'ComplexFormation', 'MetabolicReaction'}
PANTOATE-BETA-ALANINE-LIG-CPLX_mod_mg2_mod_k	C2798H4578KMgN782O828S24	None	Complex		{}	{}	c	{'ComplexFormation', 'MetabolicReaction'}
PANTOATE-BETA-ALANINE-LIG-CPLX_mod_mg2_mod_nh4	C2798H4582MgN783O828S24	None	Complex		{}	{}	c	{'ComplexFormation', 'MetabolicReaction'}
PANTOATE-BETA-ALANINE-LIG-CPLX_mod_mn2_mod_k	C2798H4578KMnN782O828S24	None	Complex		{}	{}	c	{'ComplexFormation', 'MetabolicReaction'}
PANTOATE-BETA-ALANINE-LIG-CPLX_mod_mn2_mod_nh4	C2798H4582MnN783O828S24	None	Complex		{}	{}	c	{'ComplexFormation', 'MetabolicReaction'}
HOMOSERKIN-CPLX_mod_k_mod_mg2	C2970H4690KMgN826O878S38	None	Complex		{}	{}	c	{'ComplexFormation', 'MetabolicReaction'}
AIRS-CPLX_mod_k_mod_mg2	C3252H5130KMgN870O1006S28	None	Complex		{}	{}	c	{'ComplexFormation', 'MetabolicReaction'}
CPLX0-322_mod_k_mod_mg2	C4302H6652KMgN1172O1308S36	None	Complex		{}	{}	c	{'ComplexFormation', 'MetabolicReaction'}
CPLX0-7647_mod_k_mod_mg2	C2830H4574KMgN816O892S8	None	Complex		{}	{}	c	{'ComplexFormation', 'MetabolicReaction'}
UDP-NACMURALA-GLU-LIG-MONOMER_mod_k_mod_mg2	C2058H3280KMgN577O632S19	None	Complex		{}	{}	c	{'ComplexFormation', 'MetabolicReaction'}
G6986-MONOMER_mod_k_mod_mg2	C1805H2768KMgN493O524S17	None	Complex		{}	{}	c	{'ComplexFormation', 'MetabolicReaction'}
NADH-DHII-MONOMER_mod_mg2_mod_cu_mod_fad	C2118CuH3408MgN606O626P2S18	None	Complex		{}	{}	c	{'ComplexFormation', 'MetabolicReaction'}
ARGDECARBOXBIO-CPLX_mod_mg2_mod_4:pydx5p	C13076H20144MgN3592O4032P4S128	None	Complex		{}	{}	p	{'ComplexFormation', 'MetabolicReaction'}
PYRUVOXID-CPLX_mod_mg2_mod_thmpp_mod_fad	C11059H17491MgN3029O3270P4S121	None	Complex		{}	{}	c	{'ComplexFormation', 'MetabolicReaction'}
PEPCARBOXYKIN-MONOMER_mod_mg2	C2672H4126MgN712O806S16	None	Complex		{}	{}	c	{'ComplexFormation', 'MetabolicReaction'}
PEPCARBOXYKIN-MONOMER_mod_ca2	C2672CaH4126N712O806S16	None	Complex		{}	{}	c	{'ComplexFormation', 'MetabolicReaction'}
PEPCARBOXYKIN-MONOMER_mod_mn2	C2672H4126MnN712O806S16	None	Complex		{}	{}	c	{'ComplexFormation', 'MetabolicReaction'}
HEMEOSYN-MONOMER_mod_mg2	C1519H2365MgN362O380S15	None	Complex		{}	{}	im	{'ComplexFormation', 'MetabolicReaction'}
HEMEOSYN-MONOMER_mod_ca2	C1519CaH2365N362O380S15	None	Complex		{}	{}	im	{'ComplexFormation', 'MetabolicReaction'}
GLY3KIN-MONOMER_mod_mg2	C1692H2736MgN470O526S20	None	Complex		{}	{}	c	{'ComplexFormation', 'MetabolicReaction'}
GLY3KIN-MONOMER_mod_cobalt2	C1692CoH2736N470O526S20	None	Complex		{}	{}	c	{'ComplexFormation', 'MetabolicReaction'}
GLY3KIN-MONOMER_mod_mn2	C1692H2736MnN470O526S20	None	Complex		{}	{}	c	{'ComplexFormation', 'MetabolicReaction'}
GLY3KIN-MONOMER_mod_fe2	C1692FeH2736N470O526S20	None	Complex		{}	{}	c	{'ComplexFormation', 'MetabolicReaction'}
GLY3KIN-MONOMER_mod_ca2	C1692CaH2736N470O526S20	None	Complex		{}	{}	c	{'ComplexFormation', 'MetabolicReaction'}
PD04413_mod_mg2	C2139H3265MgN562O625S15	None	Complex		{}	{}	c	{'ComplexFormation', 'MetabolicReaction'}
PD04413_mod_mn2	C2139H3265MnN562O625S15	None	Complex		{}	{}	c	{'ComplexFormation', 'MetabolicReaction'}
PD04413_mod_ca2	C2139CaH3265N562O625S15	None	Complex		{}	{}	c	{'ComplexFormation', 'MetabolicReaction'}
PD04413_mod_zn2	C2139H3265N562O625S15Zn	None	Complex		{}	{}	c	{'ComplexFormation', 'MetabolicReaction'}
PD04413_mod_cu2	C2139CuH3265N562O625S15	None	Complex		{}	{}	c	{'ComplexFormation', 'MetabolicReaction'}
PD04413_mod_cd2	C2139CdH3265N562O625S15	None	Complex		{}	{}	c	{'ComplexFormation', 'MetabolicReaction'}
PD04413_mod_cobalt2	C2139CoH3265N562O625S15	None	Complex		{}	{}	c	{'ComplexFormation', 'MetabolicReaction'}
PD04413_mod_ni2	C2139H3265N562NiO625S15	None	Complex		{}	{}	c	{'ComplexFormation', 'MetabolicReaction'}
NUCLEOSIDE-DIP-KIN-CPLX_mod_mg2	C2724H4228MgN764O828S12	None	Complex		{}	{}	c	{'ComplexFormation', 'MetabolicReaction'}
NUCLEOSIDE-DIP-KIN-CPLX_mod_mn2	C2724H4228MnN764O828S12	None	Complex		{}	{}	c	{'ComplexFormation', 'MetabolicReaction'}
NUCLEOSIDE-DIP-KIN-CPLX_mod_ca2	C2724CaH4228N764O828S12	None	Complex		{}	{}	c	{'ComplexFormation', 'MetabolicReaction'}
FOLXTET-CPLX_mod_mg2	C4944H7936MgN1448O1480S8	None	Complex		{}	{}	c	{'ComplexFormation', 'MetabolicReaction'}
FOLXTET-CPLX_mod_mn2	C4944H7936MnN1448O1480S8	None	Complex		{}	{}	c	{'ComplexFormation', 'MetabolicReaction'}
FOLXTET-CPLX_mod_ca2	C4944CaH7936N1448O1480S8	None	Complex		{}	{}	c	{'ComplexFormation', 'MetabolicReaction'}
ADENYLYLSULFKIN-CPLX_mod_mg2	C1950H3106MgN582O588S8	None	Complex		{}	{}	c	{'ComplexFormation', 'MetabolicReaction'}
ADENYLYLSULFKIN-CPLX_mod_mn2	C1950H3106MnN582O588S8	None	Complex		{}	{}	c	{'ComplexFormation', 'MetabolicReaction'}
ADENYLYLSULFKIN-CPLX_mod_cobalt2	C1950CoH3106N582O588S8	None	Complex		{}	{}	c	{'ComplexFormation', 'MetabolicReaction'}
ADENYLYLSULFKIN-CPLX_mod_cd2	C1950CdH3106N582O588S8	None	Complex		{}	{}	c	{'ComplexFormation', 'MetabolicReaction'}
ASPARTASE-CPLX_mod_mg2	C9216H14764MgN2496O2836S108	None	Complex		{}	{}	c	{'ComplexFormation', 'MetabolicReaction'}
ASPARTASE-CPLX_mod_mn2	C9216H14764MnN2496O2836S108	None	Complex		{}	{}	c	{'ComplexFormation', 'MetabolicReaction'}
ASPARTASE-CPLX_mod_cobalt2	C9216CoH14764N2496O2836S108	None	Complex		{}	{}	c	{'ComplexFormation', 'MetabolicReaction'}
CPLX0-7712_mod_mg2	C1658H2482MgN446O484S4	None	Complex		{}	{}	c	{'ComplexFormation', 'MetabolicReaction'}
CPLX0-7712_mod_mn2	C1658H2482MnN446O484S4	None	Complex		{}	{}	c	{'ComplexFormation', 'MetabolicReaction'}
NAD-SYNTH-CPLX_mod_mg2	C2720H4324MgN748O832S14	None	Complex		{}	{}	c	{'ComplexFormation', 'MetabolicReaction'}
NAD-SYNTH-CPLX_mod_mn2	C2720H4324MnN748O832S14	None	Complex		{}	{}	c	{'ComplexFormation', 'MetabolicReaction'}
ADENPRIBOSYLTRAN-CPLX_mod_mg2	C1806H2890MgN464O534S2	None	Complex		{}	{}	c	{'ComplexFormation', 'MetabolicReaction'}
ADENPRIBOSYLTRAN-CPLX_mod_mn2	C1806H2890MnN464O534S2	None	Complex		{}	{}	c	{'ComplexFormation', 'MetabolicReaction'}
GLYCEROL-KIN-CPLX_mod_mg2	C9948H15516MgN2760O3008S76	None	Complex		{}	{}	c	{'ComplexFormation', 'MetabolicReaction'}
GLYCEROL-KIN-CPLX_mod_mn2	C9948H15516MnN2760O3008S76	None	Complex		{}	{}	c	{'ComplexFormation', 'MetabolicReaction'}
HOLO-ACP-SYNTH-CPLX_mod_mg2	C1254H2012MgN366O344S4	None	Complex		{}	{}	c	{'ComplexFormation', 'MetabolicReaction'}
HOLO-ACP-SYNTH-CPLX_mod_mn2	C1254H2012MnN366O344S4	None	Complex		{}	{}	c	{'ComplexFormation', 'MetabolicReaction'}
ISOCIT-LYASE_mod_mg2	C8484H13008MgN2272O2580S60	None	Complex		{}	{}	c	{'ComplexFormation', 'MetabolicReaction'}
ISOCIT-LYASE_mod_mn2	C8484H13008MnN2272O2580S60	None	Complex		{}	{}	c	{'ComplexFormation', 'MetabolicReaction'}
FPPSYN-MONOMER_mod_mg2	C1405H2269MgN403O437S11	None	Complex		{}	{}	c	{'ComplexFormation', 'MetabolicReaction'}
FPPSYN-MONOMER_mod_mn2	C1405H2269MnN403O437S11	None	Complex		{}	{}	c	{'ComplexFormation', 'MetabolicReaction'}
G6954-MONOMER_mod_mg2	C670H1043MgN191O196S4	None	Complex		{}	{}	c	{'ComplexFormation', 'MetabolicReaction'}
G6954-MONOMER_mod_mn2	C670H1043MnN191O196S4	None	Complex		{}	{}	c	{'ComplexFormation', 'MetabolicReaction'}
EG11829-MONOMER_mod_mg2	C961H1510MgN274O276S10	None	Complex		{}	{}	c	{'ComplexFormation', 'MetabolicReaction'}
EG11829-MONOMER_mod_mn2	C961H1510MnN274O276S10	None	Complex		{}	{}	c	{'ComplexFormation', 'MetabolicReaction'}
IMIDHISTID-CPLX_mod_mg2	C3564H5592MgN996O1062S36	None	Complex		{}	{}	c	{'ComplexFormation', 'MetabolicReaction'}
AROK-MONOMER_mod_mg2	C841H1370MgN249O271S3	None	Complex		{}	{}	c	{'ComplexFormation', 'MetabolicReaction'}
AROK-MONOMER_mod_mn2	C841H1370MnN249O271S3	None	Complex		{}	{}	c	{'ComplexFormation', 'MetabolicReaction'}
AROK-MONOMER_mod_cobalt2	C841CoH1370N249O271S3	None	Complex		{}	{}	c	{'ComplexFormation', 'MetabolicReaction'}
AROK-MONOMER_mod_fe2	C841FeH1370N249O271S3	None	Complex		{}	{}	c	{'ComplexFormation', 'MetabolicReaction'}
AROK-MONOMER_mod_ca2	C841CaH1370N249O271S3	None	Complex		{}	{}	c	{'ComplexFormation', 'MetabolicReaction'}
AROK-MONOMER_mod_k	C841H1370KN249O271S3	None	Complex		{}	{}	c	{'ComplexFormation', 'MetabolicReaction'}
AROL-MONOMER_mod_mg2	C834H1337MgN234O261S6	None	Complex		{}	{}	c	{'ComplexFormation', 'MetabolicReaction'}
AROL-MONOMER_mod_mn2	C834H1337MnN234O261S6	None	Complex		{}	{}	c	{'ComplexFormation', 'MetabolicReaction'}
AROL-MONOMER_mod_cobalt2	C834CoH1337N234O261S6	None	Complex		{}	{}	c	{'ComplexFormation', 'MetabolicReaction'}
AROL-MONOMER_mod_fe2	C834FeH1337N234O261S6	None	Complex		{}	{}	c	{'ComplexFormation', 'MetabolicReaction'}
AROL-MONOMER_mod_ca2	C834CaH1337N234O261S6	None	Complex		{}	{}	c	{'ComplexFormation', 'MetabolicReaction'}
AROL-MONOMER_mod_k	C834H1337KN234O261S6	None	Complex		{}	{}	c	{'ComplexFormation', 'MetabolicReaction'}
6PFK-2-CPX_mod_mg2	C2840H4628MgN798O898S18	None	Complex		{}	{}	c	{'ComplexFormation', 'MetabolicReaction'}
CPLX0-1622_mod_mg2	C8030H12656MgN2218O2376S68	None	Complex		{}	{}	c	{'ComplexFormation', 'MetabolicReaction'}
ACETATEKINA-MONOMER_mod_mg2	C1918H3042MgN525O582S16	None	Complex		{}	{}	c	{'ComplexFormation', 'MetabolicReaction'}
GLUCARDEHYDRA-MONOMER_mod_mg2	C2176H3382MgN604O645S21	None	Complex		{}	{}	c	{'ComplexFormation', 'MetabolicReaction'}
GMP-SYN-CPLX_mod_mg2	C5256H8192MgN1424O1536S44	None	Complex		{}	{}	c	{'ComplexFormation', 'MetabolicReaction'}
1-PFK_mod_mg2	C3000H4764MgN830O892S24	None	Complex		{}	{}	c	{'ComplexFormation', 'MetabolicReaction'}
3-METHYL-2-OXOBUT-OHCH3XFER-CPLX_mod_mg2	C12600H19860MgN3350O3760S120	None	Complex		{}	{}	c	{'ComplexFormation', 'MetabolicReaction'}
ACETYLGLUTKIN-CPLX_mod_mg2	C2402H3966MgN664O724S18	None	Complex		{}	{}	c	{'ComplexFormation', 'MetabolicReaction'}
ACYLCOASYN-CPLX_mod_mg2	C5618H8896MgN1500O1620S40	None	Complex		{}	{}	c	{'ComplexFormation', 'MetabolicReaction'}
ADENYLOSUCCINATE-SYN-DIMER_mod_mg2	C4184H6652MgN1152O1280S26	None	Complex		{}	{}	c	{'ComplexFormation', 'MetabolicReaction'}
APHA-CPLX_mod_mg2	C4664H7260MgN1288O1392S24	None	Complex		{}	{}	p	{'ComplexFormation', 'MetabolicReaction'}
ASNSYNA-CPLX_mod_mg2	C3262H5102MgN918O974S16	None	Complex		{}	{}	c	{'ComplexFormation', 'MetabolicReaction'}
ASNSYNB-CPLX_mod_mg2	C5598H8554MgN1506O1662S46	None	Complex		{}	{}	c	{'ComplexFormation', 'MetabolicReaction'}
COADTRI-CPLX_mod_mg2	C4782H7530MgN1332O1350S54	None	Complex		{}	{}	c	{'ComplexFormation', 'MetabolicReaction'}
CPLX0-1021_mod_mg2	C5648H9016MgN1580O1728S40	None	Complex		{}	{}	c	{'ComplexFormation', 'MetabolicReaction'}
CPLX0-1221_mod_mg2	C1890H2966MgN502O570S14	None	Complex		{}	{}	c	{'ComplexFormation', 'MetabolicReaction'}
GTP-CYCLOHYDRO-II-CPLX_mod_mg2	C1934H3062MgN546O574S16	None	Complex		{}	{}	c	{'ComplexFormation', 'MetabolicReaction'}
Trp_RS_dim_mod_mg2	C3334H5262MgN906O996S28	None	Complex		{}	{}	c	{'tRNAChargingReaction', 'ComplexFormation'}
UDP-NACMUR-ALA-LIG-MONOMER_mod_mg2	C2364H3740MgN679O712S17	None	Complex		{}	{}	c	{'ComplexFormation', 'MetabolicReaction'}
EG11736-MONOMER_mod_mg2	C942H1461MgN256O285S11	None	Complex		{}	{}	c	{'ComplexFormation', 'MetabolicReaction'}
THI-P-KIN-MONOMER_mod_mg2	C1562H2428MgN417O476S12	None	Complex		{}	{}	c	{'ComplexFormation', 'MetabolicReaction'}
PGPPHOSPHAA-MONOMER_mod_mg2	C914H1374MgN225O218S13	None	Complex		{}	{}	im	{'ComplexFormation', 'MetabolicReaction'}
ADENYL-KIN-MONOMER_mod_mg2	C1040H1686MgN289O320S7	None	Complex		{}	{}	c	{'ComplexFormation', 'MetabolicReaction'}
ENTC-MONOMER_mod_mg2	C1902H2993MgN535O576S11	None	Complex		{}	{}	c	{'ComplexFormation', 'MetabolicReaction'}
NICONUCADENYLYLTRAN-MONOMER_mod_mg2	C1111H1709MgN298O320S5	None	Complex		{}	{}	c	{'ComplexFormation', 'MetabolicReaction'}
PHOSPHOGLUCMUT-MONOMER_mod_mg2	C2586H4042MgN717O791S16	None	Complex		{}	{}	c	{'ComplexFormation', 'MetabolicReaction'}
GALACTOKIN-MONOMER_mod_mg2	C1810H2872MgN510O561S17	None	Complex		{}	{}	c	{'ComplexFormation', 'MetabolicReaction'}
EG11239-MONOMER_mod_mg2	C1348H2077MgN369O399S11	None	Complex		{}	{}	c	{'ComplexFormation', 'MetabolicReaction'}
G6425-MONOMER_mod_mg2	C1371H2138MgN364O400S9	None	Complex		{}	{}	c	{'ComplexFormation', 'MetabolicReaction'}
TETRAACYLDISACC4KIN-MONOMER_mod_mg2	C1596H2565MgN450O449S11	None	Complex		{}	{}	im	{'ComplexFormation', 'MetabolicReaction'}
CPM-KDOSYNTH-MONOMER_mod_mg2	C1216H1913MgN348O363S8	None	Complex		{}	{}	c	{'ComplexFormation', 'MetabolicReaction'}
DTMPKI-MONOMER_mod_mg2	C1049H1695MgN298O321S5	None	Complex		{}	{}	c	{'ComplexFormation', 'MetabolicReaction'}
THIKIN-MONOMER_mod_mg2	C1487H2279MgN420O386S6	None	Complex		{}	{}	c	{'ComplexFormation', 'MetabolicReaction'}
G6880-MONOMER_mod_mg2	C1760H2783MgN493O514S13	None	Complex		{}	{}	c	{'ComplexFormation', 'MetabolicReaction'}
EG10943-MONOMER_mod_mg2	C1617H2595MgN441O491S19	None	Complex		{}	{}	c	{'ComplexFormation', 'MetabolicReaction'}
H2NEOPTERINP3PYROPHOSPHOHYDRO-MONOMER_mod_mg2	C775H1212MgN214O226S5	None	Complex		{}	{}	c	{'ComplexFormation', 'MetabolicReaction'}
ArgS_mono_mod_mg2	C2874H4521MgN785O860S26	None	Complex		{}	{}	c	{'tRNAChargingReaction', 'ComplexFormation'}
TREHALOSEPHOSPHASYN-MONOMER_mod_mg2	C1300H2043MgN358O387S9	None	Complex		{}	{}	c	{'ComplexFormation', 'MetabolicReaction'}
PHOSPHAGLYPSYN-MONOMER_mod_mg2	C983H1493MgN235O236S6	None	Complex		{}	{}	im	{'ComplexFormation', 'MetabolicReaction'}
DTDPGLUCOSEPP-MONOMER_mod_mg2	C1471H2308MgN382O435S12	None	Complex		{}	{}	c	{'ComplexFormation', 'MetabolicReaction'}
UDK-MONOMER_mod_mg2	C1076H1738MgN299O321S11	None	Complex		{}	{}	c	{'ComplexFormation', 'MetabolicReaction'}
O-SUCCINYLBENZOATE-COA-SYN-MONOMER_mod_mg2	C1579H2501MgN436O470S11	None	Complex		{}	{}	c	{'ComplexFormation', 'MetabolicReaction'}
EG10534-MONOMER_mod_mg2	C3258H5218MgN918O985S18	None	Complex		{}	{}	c	{'ComplexFormation', 'MetabolicReaction'}
EG10983-MONOMER_mod_mg2	C1292H2049MgN367O389S7	None	Complex		{}	{}	c	{'ComplexFormation', 'MetabolicReaction'}
FGAMSYN-MONOMER_mod_mg2	C6228H9718MgN1775O1897S48	None	Complex		{}	{}	c	{'ComplexFormation', 'MetabolicReaction'}
GLUTCYSLIG-MONOMER_mod_mg2	C2598H4037MgN703O777S22	None	Complex		{}	{}	c	{'ComplexFormation', 'MetabolicReaction'}
G7408-MONOMER_mod_mg2	C924H1445MgN260O268S9	None	Complex		{}	{}	c	{'ComplexFormation', 'MetabolicReaction'}
FUCULOKIN-MONOMER_mod_mg2	C2375H3711MgN651O698S21	None	Complex		{}	{}	c	{'ComplexFormation', 'MetabolicReaction'}
G7496-MONOMER_mod_mg2	C953H1515MgN261O281S12	None	Complex		{}	{}	c	{'ComplexFormation', 'MetabolicReaction'}
MALSYNG-MONOMER_mod_mg2	C3538H5601MgN1014O1069S28	None	Complex		{}	{}	c	{'ComplexFormation', 'MetabolicReaction'}
GLYCPDIESTER-CYTO-MONOMER_mod_mg2	C1220H1932MgN342O352S12	None	Complex		{}	{}	c	{'ComplexFormation', 'MetabolicReaction'}
DEOXYGLUCONOKIN-MONOMER_mod_mg2	C1498H2353MgN408O470S11	None	Complex		{}	{}	c	{'ComplexFormation', 'MetabolicReaction'}
GLCNACPTRANS-MONOMER_mod_mg2	C1929H3029MgN480O462S20	None	Complex		{}	{}	im	{'ComplexFormation', 'MetabolicReaction'}
ADENYLATECYC-MONOMER_mod_mg2	C4388H6740MgN1193O1273S31	None	Complex		{}	{}	c	{'ComplexFormation', 'MetabolicReaction'}
EG11470-MONOMER_mod_mg2	C1318H2038MgN360O397S13	None	Complex		{}	{}	c	{'ComplexFormation', 'MetabolicReaction'}
RHAMNULOKIN-MONOMER_mod_mg2	C2373H3711MgN674O731S21	None	Complex		{}	{}	c	{'ComplexFormation', 'MetabolicReaction'}
DMK-MONOMER_mod_mg2	C1546H2485MgN402O403S14	None	Complex		{}	{}	im	{'ComplexFormation', 'MetabolicReaction'}
THIE-MONOMER_mod_mg2	C1028H1635MgN293O301S3	None	Complex		{}	{}	c	{'ComplexFormation', 'MetabolicReaction'}
4OHBENZOATE-OCTAPRENYLTRANSFER-MONOMER_mod_mg2	C1534H2369MgN373O377S14	None	Complex		{}	{}	im	{'ComplexFormation', 'MetabolicReaction'}
EG10043-MONOMER_mod_mg2	C1213H1877MgN335O358S9	None	Complex		{}	{}	c	{'ComplexFormation', 'MetabolicReaction'}
EG12440-MONOMER_mod_mg2	C2222H3455MgN615O646S23	None	Complex		{}	{}	c	{'ComplexFormation', 'MetabolicReaction'}
ValS_mono_mod_mg2	C4824H7513MgN1321O1429S40	None	Complex		{}	{}	c	{'tRNAChargingReaction', 'ComplexFormation'}
PSERPHOSPHA-MONOMER_mod_mg2	C1562H2521MgN422O459S15	None	Complex		{}	{}	c	{'ComplexFormation', 'MetabolicReaction'}
PRPPSYN-MONOMER_mod_mg2_mod_pi	C1489H2426MgN430O461PS13	None	Complex		{}	{}	c	{'ComplexFormation', 'MetabolicReaction'}
PRPPSYN-MONOMER_mod_mn2_mod_pi	C1489H2426MnN430O461PS13	None	Complex		{}	{}	c	{'ComplexFormation', 'MetabolicReaction'}
GPH-MONOMER_mod_mg2_mod_cl	C1225ClH1916MgN324O373S7	None	Complex		{}	{}	c	{'ComplexFormation', 'MetabolicReaction'}
CDPDIGLYSYN-MONOMER_mod_mg2_mod_k	C1500H2319KMgN360O355S12	None	Complex		{}	{}	im	{'ComplexFormation', 'MetabolicReaction'}
Fmt_mono_mod_mg2_mod_k	C1517H2442KMgN414O450S11	None	Complex		{}	{}	c	{'ComplexFormation', 'TranslationReaction'}
CPLX0-7525_mod_mg2_mod_mn2_mod_thmpp	C5504H8614MgMnN1566O1585P2S31	None	Complex		{}	{}	c	{'ComplexFormation', 'MetabolicReaction'}
3-ISOPROPYLMALDEHYDROG-CPLX_mod_mg2_mod_mn2	C3486H5484MgMnN970O1054S28	None	Complex		{}	{}	c	{'ComplexFormation', 'MetabolicReaction'}
GltX_mono_mod_mg2_mod_1:zn2	C2379H3677MgN675O716S19Zn	None	Complex		{}	{}	c	{'tRNAChargingReaction', 'ComplexFormation'}
GLYOCARBOLIG-CPLX_mod_mg2_mod_thmpp_mod_fad	C5779H9121MgN1597O1692P4S69	None	Complex		{}	{}	c	{'ComplexFormation', 'MetabolicReaction'}
CPLX0-234_mod_mg2	C2246H3580MgN670O674S14	None	Complex		{}	{}	c	{'ComplexFormation', 'MetabolicReaction'}
CPLX0-234_mod_mn2	C2246H3580MnN670O674S14	None	Complex		{}	{}	c	{'ComplexFormation', 'MetabolicReaction'}
CPLX0-234_mod_cobalt2	C2246CoH3580N670O674S14	None	Complex		{}	{}	c	{'ComplexFormation', 'MetabolicReaction'}
CPLX0-238_mod_mg2	C8764H13688MgN2436O2712S76	None	Complex		{}	{}	c	{'ComplexFormation', 'MetabolicReaction'}
CPLX0-243_mod_mg2	C5334H8214MgN1344O1578S30	None	Complex		{}	{}	c	{'ComplexFormation', 'MetabolicReaction'}
CPLX0-3482_mod_mg2	C10104H15692MgN2696O2972S84	None	Complex		{}	{}	c	{'ComplexFormation', 'MetabolicReaction'}
CPLX0-3721_mod_mg2	C2106H3288MgN588O634S10	None	Complex		{}	{}	c	{'ComplexFormation', 'MetabolicReaction'}
CPLX0-3841_mod_mg2	C2764H4338MgN752O818S20	None	Complex		{}	{}	c	{'ComplexFormation', 'MetabolicReaction'}
CPLX0-3948_mod_mg2	C1616H2546MgN460O484S8	None	Complex		{}	{}	c	{'ComplexFormation', 'MetabolicReaction'}
CPLX0-682_mod_mg2	C8712H13824MgN2406O2562S66	None	Complex		{}	{}	c	{'ComplexFormation', 'MetabolicReaction'}
CPLX0-7426_mod_mg2	C3076H4886MgN862O968S30	None	Complex		{}	{}	c	{'ComplexFormation', 'MetabolicReaction'}
CPLX0-7615_mod_mg2	C7404H11562MgN1998O2184S24	None	Complex		{}	{}	c	{'ComplexFormation', 'MetabolicReaction'}
CPLX0-7692_mod_mg2	C2666H4174MgN748O836S22	None	Complex		{}	{}	c	{'ComplexFormation', 'MetabolicReaction'}
CPLX0-7704_mod_mg2	C5720H9276MgN1576O1688S56	None	Complex		{}	{}	im	{'ComplexFormation', 'MetabolicReaction'}
CPLX0-7709_mod_mg2	C28068H43464MgN7836O8592S300	None	Complex		{}	{}	c	{'ComplexFormation', 'MetabolicReaction'}
CPLX0-7744_mod_mg2	C2100H3326MgN574O622S18	None	Complex		{}	{}	c	{'ComplexFormation', 'MetabolicReaction'}
CPLX0-7826_mod_mg2	C1858H2966MgN518O578S8	None	Complex		{}	{}	c	{'ComplexFormation', 'MetabolicReaction'}
CTPSYN-CPLX_mod_mg2	C10688H17012MgN2968O3204S80	None	Complex		{}	{}	c	{'ComplexFormation', 'MetabolicReaction'}
DETHIOBIOTIN-SYN-CPLX_mod_mg2	C2154H3382MgN574O644S12	None	Complex		{}	{}	c	{'ComplexFormation', 'MetabolicReaction'}
DGTPTRIPHYDRO-CPLX_mod_mg2	C10664H16572MgN2992O3016S64	None	Complex		{}	{}	c	{'ComplexFormation', 'MetabolicReaction'}
DIOHBUTANONEPSYN-CPLX_mod_mg2	C2000H3222MgN582O648S28	None	Complex		{}	{}	c	{'ComplexFormation', 'MetabolicReaction'}
Eno_dim_mod_4:mg2	C4006H6442Mg4N1092O1268S26	None	Complex		{}	{}	c	{'ComplexFormation', 'MetabolicReaction'}
F16B-CPLX_mod_mg2	C6584H10276MgN1760O1980S48	None	Complex		{}	{}	c	{'ComplexFormation', 'MetabolicReaction'}
GLUC1PADENYLTRANS-CPLX_mod_mg2	C8592H13492MgN2412O2552S88	None	Complex		{}	{}	c	{'ComplexFormation', 'MetabolicReaction'}
GLUCONOKINII-CPLX_mod_mg2	C2583H4089MgN726O777S15	None	Complex		{}	{}	c	{'ComplexFormation', 'MetabolicReaction'}
GLUTATHIONE-SYN-CPLX_mod_mg2	C6344H10060MgN1704O1888S56	None	Complex		{}	{}	c	{'ComplexFormation', 'MetabolicReaction'}
GLUTKIN-CPLX_mod_mg2	C6820H11152MgN2016O2104S36	None	Complex		{}	{}	c	{'ComplexFormation', 'MetabolicReaction'}
H2PTEROATESYNTH-CPLX_mod_mg2	C2696H4320MgN756O816S26	None	Complex		{}	{}	c	{'ComplexFormation', 'MetabolicReaction'}
His_RS_dim_mod_4:mg2	C4146H6550Mg4N1186O1246S26	None	Complex		{}	{}	c	{'tRNAChargingReaction', 'ComplexFormation'}
KDO-8PPHOSPHAT-CPLX_mod_mg2	C3520H5740MgN956O1076S24	None	Complex		{}	{}	c	{'ComplexFormation', 'MetabolicReaction'}
MENE-CPLX_mod_mg2	C9028H14108MgN2516O2548S64	None	Complex		{}	{}	c	{'ComplexFormation', 'MetabolicReaction'}
MENF-CPLX_mod_mg2	C4328H6836MgN1254O1266S26	None	Complex		{}	{}	c	{'ComplexFormation', 'MetabolicReaction'}
NAG1P-URIDYLTRANS-CPLX_mod_mg2	C6468H10491MgN1872O1989S39	None	Complex		{}	{}	c	{'ComplexFormation', 'MetabolicReaction'}
OROPRIBTRANS-CPLX_mod_mg2	C2110H3314MgN562O624S10	None	Complex		{}	{}	c	{'ComplexFormation', 'MetabolicReaction'}
PANTOTHENATE-KIN-CPLX_mod_mg2	C3296H5176MgN880O946S14	None	Complex		{}	{}	c	{'ComplexFormation', 'MetabolicReaction'}
PEPCARBOX-CPLX_mod_mg2	C17612H28076MgN4884O5240S128	None	Complex		{}	{}	c	{'ComplexFormation', 'MetabolicReaction'}
PEPSYNTH-CPLX_mod_mg2	C7664H12036MgN2142O2374S74	None	Complex		{}	{}	c	{'ComplexFormation', 'MetabolicReaction'}
PPX-CPLX_mod_mg2	C5168H8222MgN1472O1484S40	None	Complex		{}	{}	c	{'ComplexFormation', 'MetabolicReaction'}
PRPPAMIDOTRANS-CPLX_mod_mg2	C9928H15652MgN2836O3020S72	None	Complex		{}	{}	c	{'ComplexFormation', 'MetabolicReaction'}
QUINOPRIBOTRANS-CPLX_mod_mg2	C2862H4594MgN824O898S10	None	Complex		{}	{}	c	{'ComplexFormation', 'MetabolicReaction'}
THYMIDYLATESYN-CPLX_mod_mg2	C2748H4166MgN742O786S24	None	Complex		{}	{}	c	{'ComplexFormation', 'MetabolicReaction'}
UPPSYN-CPLX_mod_mg2	C2508H3926MgN744O742S16	None	Complex		{}	{}	c	{'ComplexFormation', 'MetabolicReaction'}
H2PTERIDINEPYROPHOSPHOKIN-MONOMER_mod_mg2	C811H1268MgN219O233S4	None	Complex		{}	{}	c	{'ComplexFormation', 'MetabolicReaction'}
DXPREDISOM-CPLX_mod_mn2	C3784H6112MnN1068O1154S54	None	Complex		{}	{}	c	{'ComplexFormation', 'MetabolicReaction'}
DXPREDISOM-CPLX_mod_cobalt2	C3784CoH6112N1068O1154S54	None	Complex		{}	{}	c	{'ComplexFormation', 'MetabolicReaction'}
DXPREDISOM-CPLX_mod_mg2	C3784H6112MgN1068O1154S54	None	Complex		{}	{}	c	{'ComplexFormation', 'MetabolicReaction'}
MALIC-NAD-CPLX_mod_mn2	C11272H17756MnN3052O3360S92	None	Complex		{}	{}	c	{'ComplexFormation', 'MetabolicReaction'}
MALIC-NAD-CPLX_mod_mg2	C11272H17756MgN3052O3360S92	None	Complex		{}	{}	c	{'ComplexFormation', 'MetabolicReaction'}
MALIC-NADP-CPLX_mod_mn2	C22014H35358MnN5952O6516S210	None	Complex		{}	{}	c	{'ComplexFormation', 'MetabolicReaction'}
MALIC-NADP-CPLX_mod_mg2	C22014H35358MgN5952O6516S210	None	Complex		{}	{}	c	{'ComplexFormation', 'MetabolicReaction'}
SUPEROX-DISMUTMN-CPLX_mod_mn2	C2088H3156MnN560O602S6	None	Complex		{}	{}	c	{'ComplexFormation', 'MetabolicReaction'}
AGMATIN-CPLX_mod_2:mn2	C2984H4576Mn2N814O892S30	None	Complex		{}	{}	c	{'ComplexFormation', 'MetabolicReaction'}
ALPHAGALACTOSID-CPLX_mod_mn2	C4504H7004MnN1222O1326S56	None	Complex		{}	{}	c	{'ComplexFormation', 'MetabolicReaction'}
EG12115-MONOMER_mod_mn2	C1139H1733MnN302O338S7	None	Complex		{}	{}	c	{'ComplexFormation', 'MetabolicReaction'}
PPENTOMUT-MONOMER_mod_mn2	C1972H3020MnN536O602S15	None	Complex		{}	{}	c	{'ComplexFormation', 'MetabolicReaction'}
TRANSKETOI-CPLX_mod_thmpp_mod_mn2_mod_mg2	C6440H9926MgMnN1752O1943P2S55	None	Complex		{}	{}	c	{'ComplexFormation', 'MetabolicReaction'}
EG10626-MONOMER_mod_mn2_mod_mg2	C679H1036MgMnN180O192S4	None	Complex		{}	{}	c	{'ComplexFormation', 'MetabolicReaction'}
ARABISOM-CPLX_mod_mn2	C15018H23214MnN4176O4344S144	None	Complex		{}	{}	c	{'ComplexFormation', 'MetabolicReaction'}
CPLX0-1683_mod_mn2	C5616H8824MnN1586O1708S48	None	Complex		{}	{}	c	{'ComplexFormation', 'MetabolicReaction'}
CPLX0-303_mod_mn2	C3106H5142MnN906O964S34	None	Complex		{}	{}	c	{'ComplexFormation', 'MetabolicReaction'}
CPLX0-721_mod_mn2	C2262H3624MnN630O654S18	None	Complex		{}	{}	c	{'ComplexFormation', 'MetabolicReaction'}
CPLX0-7631_mod_mn2	C17118H26610MnN4818O5196S210	None	Complex		{}	{}	c	{'ComplexFormation', 'MetabolicReaction'}
CPLX0-7776_mod_mn2	C2996H4836MnN840O924S38	None	Complex		{}	{}	c	{'ComplexFormation', 'MetabolicReaction'}
CPLX0-7808_mod_mn2	C3106H4590MnN860O872S22	None	Complex		{}	{}	c	{'ComplexFormation', 'MetabolicReaction'}
CPLX0-7848_mod_mn2	C10872H16374MnN2886O3084S108	None	Complex		{}	{}	c	{'ComplexFormation', 'MetabolicReaction'}
CPLX-7524_mod_mn2	C4040H6292MnN1116O1216S44	None	Complex		{}	{}	c	{'ComplexFormation', 'MetabolicReaction'}
GLUTAMINESYN-OLIGOMER_mod_mn2	C27624H42504MnN7488O8364S240	None	Complex		{}	{}	c	{'ComplexFormation', 'MetabolicReaction'}
HISTDEHYD-CPLX_mod_mn2	C4024H6490MnN1122O1282S26	None	Complex		{}	{}	c	{'ComplexFormation', 'MetabolicReaction'}
XYLISOM-CPLX_mod_mn2	C8928H13444MnN2448O2612S64	None	Complex		{}	{}	c	{'ComplexFormation', 'MetabolicReaction'}
EG10124-MONOMER_mod_bmocogdp	C3860H5852MoN1090O1159P4S35	None	Complex		{}	{}	c	{'ComplexFormation', 'MetabolicReaction'}
CPLX0-3681_mod_nadp	C7916H11825N2017O2397P3S45	None	Complex		{}	{}	c	{'ComplexFormation', 'MetabolicReaction'}
CPLX0-7564_mod_nadph_mod_nadh_mod_fad_mod_cobalt2	C3113CoH4994N897O992P7S20	None	Complex		{}	{}	c	{'ComplexFormation', 'MetabolicReaction'}
GLYOXI-CPLX_mod_ni2	C1324H2072N354NiO414S8	None	Complex		{}	{}	c	{'ComplexFormation', 'MetabolicReaction'}
CPLX0-7838_mod_pydx5p	C3868H6024N1059O1154PS26	None	Complex		{}	{}	c	{'ComplexFormation', 'MetabolicReaction'}
DIAMINOPIMDECARB-CPLX_mod_pydx5p	C8172H12776N2349O2454PS52	None	Complex		{}	{}	c	{'ComplexFormation', 'MetabolicReaction'}
CPLX0-743_mod_thmpp	C6054H9576N1636O1771P2S53	None	Complex		{}	{}	c	{'ComplexFormation', 'MetabolicReaction'}
G6701-MONOMER_mod_thmpp	C5729H8979N1582O1731P2S45	None	Complex		{}	{}	c	{'ComplexFormation', 'MetabolicReaction'}
HOMOCYSMETB12-MONOMER_mod_zn2_mod_cbl1	C6081CoH9500N1667O1859PS42Zn	None	Complex		{}	{}	c	{'ComplexFormation', 'MetabolicReaction'}
Ala_RS_tetra_mod_4:zn2	C16840H26624N4828O5216S104Zn4	None	Complex		{}	{}	c	{'tRNAChargingReaction', 'ComplexFormation'}
ADHC-CPLX_mod_zn2	C3478H5494N964O1046S36Zn	None	Complex		{}	{}	c	{'ComplexFormation', 'MetabolicReaction'}
ACETYLORNDEACET-CPLX_mod_zn2	C3788H5886N1034O1112S30Zn	None	Complex		{}	{}	c	{'ComplexFormation', 'MetabolicReaction'}
CPLX0-7521_mod_zn2	C4468H7008N1272O1284S40Zn	None	Complex		{}	{}	c	{'ComplexFormation', 'MetabolicReaction'}
CysS_mono_mod_1:zn2	C2300H3547N647O693S26Zn	None	Complex		{}	{}	c	{'tRNAChargingReaction', 'ComplexFormation'}
G7502-MONOMER_mod_zn2	C2257H3468N603O661S19Zn	None	Complex		{}	{}	c	{'ComplexFormation', 'MetabolicReaction'}
HOMOCYSMET-MONOMER_mod_zn2	C3799H5936N1052O1106S15Zn	None	Complex		{}	{}	c	{'ComplexFormation', 'MetabolicReaction'}
CPLX-64_mod_cobalt2_mod_zn2	C8732CoH13756N2420O2656S100Zn	None	Complex		{}	{}	c	{'ComplexFormation', 'MetabolicReaction'}
CPLX-64_mod_mn2_mod_zn2	C8732H13756MnN2420O2656S100Zn	None	Complex		{}	{}	c	{'ComplexFormation', 'MetabolicReaction'}
CPLX-64_mod_ni2_mod_zn2	C8732H13756N2420NiO2656S100Zn	None	Complex		{}	{}	c	{'ComplexFormation', 'MetabolicReaction'}
CPLX0-3161_mod_zn2_mod_cobalt2	C7320CoH11432N2064O2164S64Zn	None	Complex		{}	{}	c	{'ComplexFormation', 'MetabolicReaction'}
CYTDEAM-MONOMER_mod_fe2_mod_zn2	C2112FeH3288N596O627S12Zn	None	Complex		{}	{}	c	{'ComplexFormation', 'MetabolicReaction'}
CYTDEAM-MONOMER_mod_mn2_mod_zn2	C2112H3288MnN596O627S12Zn	None	Complex		{}	{}	c	{'ComplexFormation', 'MetabolicReaction'}
CYTDEAM-MONOMER_mod_cobalt2_mod_zn2	C2112CoH3288N596O627S12Zn	None	Complex		{}	{}	c	{'ComplexFormation', 'MetabolicReaction'}
EG11095-MONOMER_mod_zn2_mod_fe2_mod_cobalt2_mod_mg2_mod_mn2	C1034CoFeH1557MgMnN293O286S9Zn	None	Complex		{}	{}	c	{'ComplexFormation', 'MetabolicReaction'}
IPPISOM-MONOMER_mod_mg2_mod_zn2	C912H1409MgN255O269S8Zn	None	Complex		{}	{}	c	{'ComplexFormation', 'MetabolicReaction'}
IPPISOM-MONOMER_mod_mn2_mod_zn2	C912H1409MnN255O269S8Zn	None	Complex		{}	{}	c	{'ComplexFormation', 'MetabolicReaction'}
DIHYDROOROT-CPLX_mod_2:zn2	C3438H5372N960O1012S32Zn2	None	Complex		{}	{}	c	{'ComplexFormation', 'MetabolicReaction'}
CPLX0-3061_mod_zn2	C14406H23202N4146O4374S150Zn	None	Complex		{}	{}	c	{'ComplexFormation', 'MetabolicReaction'}
CPLX0-7633_mod_zn2	C4228H6720N1176O1244S36Zn	None	Complex		{}	{}	c	{'ComplexFormation', 'MetabolicReaction'}
CYTIDEAM-CPLX_mod_zn2	C2812H4376N764O842S22Zn	None	Complex		{}	{}	c	{'ComplexFormation', 'MetabolicReaction'}
DUTP-PYROP-CPLX_mod_zn2	C2148H3402N591O648S18Zn	None	Complex		{}	{}	c	{'ComplexFormation', 'MetabolicReaction'}
FOLE-CPLX_mod_zn2	C10880H17680N3090O3270S90Zn	None	Complex		{}	{}	c	{'ComplexFormation', 'MetabolicReaction'}
Met_RS_dim_mod_2:zn2	C6832H10486N1830O2010S56Zn2	None	Complex		{}	{}	c	{'tRNAChargingReaction', 'ComplexFormation'}
NAG6PDEACET-CPLX_mod_zn2	C7268H11644N1976O2188S64Zn	None	Complex		{}	{}	c	{'ComplexFormation', 'MetabolicReaction'}
PORPHOBILSYNTH-CPLX_mod_zn2	C12424H19816N3480O3816S152Zn	None	Complex		{}	{}	c	{'ComplexFormation', 'MetabolicReaction'}
RIBULPEPIM-CPLX_mod_zn2	C4548H7020N1240O1364S36Zn	None	Complex		{}	{}	c	{'ComplexFormation', 'MetabolicReaction'}
Thr_RS_dim_mod_zn2	C6558H10172N1832O1938S72Zn	None	Complex		{}	{}	c	{'tRNAChargingReaction', 'ComplexFormation'}
IleS_mono_mod_2:zn2	C4664H7219N1261O1375S37Zn2	None	Complex		{}	{}	c	{'tRNAChargingReaction', 'ComplexFormation'}
GLYOXII-MONOMER_mod_zn2	C1280H1969N340O376S9Zn	None	Complex		{}	{}	c	{'ComplexFormation', 'MetabolicReaction'}
CPLX0-7760_mod_4fe4s	C8654Fe4H13654N2390O2618S66	None	Complex		{}	{}	c	{'ComplexFormation', 'MetabolicReaction'}
CPLX0-7761_mod_4fe4s	C8328Fe4H13188N2250O2500S70	None	Complex		{}	{}	c	{'ComplexFormation', 'MetabolicReaction'}
DIHYDROXYACIDDEHYDRAT-CPLX_mod_4fe4s	C5670Fe4H9126N1620O1792S70	None	Complex		{}	{}	c	{'ComplexFormation', 'MetabolicReaction'}
FUMARASE-A_mod_4fe4s	C5348Fe4H8406N1462O1620S42	None	Complex		{}	{}	c	{'ComplexFormation', 'MetabolicReaction'}
FUMARASE-B_mod_4fe4s	C5358Fe4H8372N1442O1620S44	None	Complex		{}	{}	c	{'ComplexFormation', 'MetabolicReaction'}
HEMN-MONOMER_mod_4fe4s	C2364Fe4H3654N649O688S21	None	Complex		{}	{}	c	{'ComplexFormation', 'MetabolicReaction'}
BIOTIN-SYN-CPLX_mod_4fe4s_mod_2fe2s	C3372Fe6H5370N944O1046S50	None	Complex		{}	{}	c	{'ComplexFormation', 'MetabolicReaction'}
OHMETHYLBILANESYN-MONOMER_mod_dpm	C1498H2448N437O460S10	None	Complex		{}	{}	c	{'ComplexFormation', 'MetabolicReaction'}
DIHYDROPTERIREDUCT-CPLX_mod_fad	C2167H3379N585O657P2S12	None	Complex		{}	{}	c	{'ComplexFormation', 'MetabolicReaction'}
GLUTATHIONE-REDUCT-NADPH-CPLX_mod_fad	C4357H6823N1191O1325P2S36	None	Complex		{}	{}	c	{'ComplexFormation', 'MetabolicReaction'}
SARCOX-MONOMER_mod_fad	C1864H2811N505O562P2S10	None	Complex		{}	{}	c	{'ComplexFormation', 'MetabolicReaction'}
GALPMUT-MONOMER_mod_fad	C1993H3009N516O575P2S9	None	Complex		{}	{}	c	{'ComplexFormation', 'MetabolicReaction'}
DLACTDEHYDROGFAD-MONOMER_mod_fad	C2906H4489N809O864P2S19	None	Complex		{}	{}	c	{'ComplexFormation', 'MetabolicReaction'}
L-ASPARTATE-OXID-MONOMER_mod_fad	C2689H4187N780O806P2S22	None	Complex		{}	{}	c	{'ComplexFormation', 'MetabolicReaction'}
UDPNACETYLMURAMATEDEHYDROG-MONOMER_mod_fad	C1721H2664N477O513P2S10	None	Complex		{}	{}	c	{'ComplexFormation', 'MetabolicReaction'}
EG10456-MONOMER_mod_fad_mod_pheme	C2033FeH3075N545O600P2S12	None	Complex		{}	{}	c	{'ComplexFormation', 'MetabolicReaction'}
PDXH-CPLX_mod_fmn	C2297H3577N666O651PS10	None	Complex		{}	{}	c	{'ComplexFormation', 'MetabolicReaction'}
L-LACTDEHYDROGFMN-MONOMER_mod_fmn	C1917H3039N535O562PS18	None	Complex		{}	{}	c	{'ComplexFormation', 'MetabolicReaction'}
HYDROPEROXIDII-CPLX_mod_6:hemed	C22812Fe6H34794N6300O6774S84	None	Complex		{}	{}	c	{'ComplexFormation', 'MetabolicReaction'}
DTDPGLUCDEHYDRAT-CPLX_mod_nad	C3643H5560N997O1124P2S12	None	Complex		{}	{}	c	{'ComplexFormation', 'MetabolicReaction'}
UDPGLUCEPIM-CPLX_mod_nad	C3333H5142N933O1004P2S24	None	Complex		{}	{}	c	{'ComplexFormation', 'MetabolicReaction'}
HYDROPEROXIDI-CPLX_mod_pheme	C14374FeH21902N3940O4304S56	None	Complex		{}	{}	c	{'ComplexFormation', 'MetabolicReaction'}
ARGDECARBOXDEG-CPLX_mod_pydx5p	C37588H57018N10101O11346PS380	None	Complex		{}	{}	c	{'ComplexFormation', 'MetabolicReaction'}
O-SUCCHOMOSERLYASE-CPLX_mod_pydx5p	C7364H11752N2085O2218PS44	None	Complex		{}	{}	c	{'ComplexFormation', 'MetabolicReaction'}
ACSERLYA-CPLX_mod_2:pydx5p	C3066H5004N832O952P2S12	None	Complex		{}	{}	c	{'ComplexFormation', 'MetabolicReaction'}
GABATRANSAM-CPLX_mod_pydx5p	C4070H6476N1125O1210PS38	None	Complex		{}	{}	c	{'ComplexFormation', 'MetabolicReaction'}
VALINE-PYRUVATE-AMINOTRANSFER-MONOMER_mod_pydx5p	C2122H3311N556O600PS22	None	Complex		{}	{}	c	{'ComplexFormation', 'MetabolicReaction'}
ACSERLYB-CPLX_mod_pydx5p	C2846H4576N819O894PS30	None	Complex		{}	{}	c	{'ComplexFormation', 'MetabolicReaction'}
AKBLIG-CPLX_mod_pydx5p	C3796H6000N1081O1156PS36	None	Complex		{}	{}	c	{'ComplexFormation', 'MetabolicReaction'}
CPLX0-1401_mod_pydx5p	C3852H6032N1049O1154PS42	None	Complex		{}	{}	c	{'ComplexFormation', 'MetabolicReaction'}
CPLX0-7465_mod_pydx5p	C3452H5478N985O1006PS32	None	Complex		{}	{}	c	{'ComplexFormation', 'MetabolicReaction'}
DAPASYN-CPLX_mod_pydx5p	C4214H6542N1155O1214PS64	None	Complex		{}	{}	c	{'ComplexFormation', 'MetabolicReaction'}
DCYSDESULF-CPLX_mod_pydx5p	C3144H4966N841O944PS18	None	Complex		{}	{}	c	{'ComplexFormation', 'MetabolicReaction'}
GLUTDECARBOXA-CPLX_mod_pydx5p	C14204H21692N3799O4110PS150	None	Complex		{}	{}	c	{'ComplexFormation', 'MetabolicReaction'}
GLUTDECARBOXB-CPLX_mod_pydx5p	C14180H21704N3805O4116PS150	None	Complex		{}	{}	c	{'ComplexFormation', 'MetabolicReaction'}
GLYCOPHOSPHORYL-CPLX_mod_pydx5p	C8356H12884N2283O2478PS48	None	Complex		{}	{}	c	{'ComplexFormation', 'MetabolicReaction'}
GSAAMINOTRANS-CPLX_mod_pydx5p	C4042H6260N1061O1208PS58	None	Complex		{}	{}	c	{'ComplexFormation', 'MetabolicReaction'}
HISTPHOSTRANS-CPLX_mod_pydx5p	C3516H5588N947O1060PS26	None	Complex		{}	{}	c	{'ComplexFormation', 'MetabolicReaction'}
LDC2-CPLX_mod_pydx5p	C36318H55738N9521O10536PS360	None	Complex		{}	{}	c	{'ComplexFormation', 'MetabolicReaction'}
LYSDECARBOX-CPLX_mod_pydx5p	C36578H56438N9551O10676PS370	None	Complex		{}	{}	c	{'ComplexFormation', 'MetabolicReaction'}
MALDEXPHOSPHORYL-CPLX_mod_pydx5p	C8158H12676N2261O2330PS40	None	Complex		{}	{}	c	{'ComplexFormation', 'MetabolicReaction'}
ORNDECARBOX-BIO-CPLX_mod_pydx5p	C7178H10932N1929O2080PS46	None	Complex		{}	{}	c	{'ComplexFormation', 'MetabolicReaction'}
ORNDECARBOXDEG-CPLX_mod_pydx5p	C7402H11330N2013O2152PS64	None	Complex		{}	{}	c	{'ComplexFormation', 'MetabolicReaction'}
PSERTRANSAM-CPLX_mod_pydx5p	C3560H5498N955O1058PS28	None	Complex		{}	{}	c	{'ComplexFormation', 'MetabolicReaction'}
THREDEHYDCAT-CPLX_mod_pydx5p	C6180H10040N1721O1922PS60	None	Complex		{}	{}	c	{'ComplexFormation', 'MetabolicReaction'}
THREDEHYDSYN-CPLX_mod_pydx5p	C10032H15732N2781O2950PS76	None	Complex		{}	{}	c	{'ComplexFormation', 'MetabolicReaction'}
THRESYN-MONOMER_mod_pydx5p	C2128H3319N565O632PS12	None	Complex		{}	{}	c	{'ComplexFormation', 'MetabolicReaction'}
G7166-MONOMER_mod_pydx5p	C1869H2951N519O545PS14	None	Complex		{}	{}	c	{'ComplexFormation', 'MetabolicReaction'}
DSERDEAM-MONOMER_mod_pydx5p	C2144H3336N579O644PS18	None	Complex		{}	{}	c	{'ComplexFormation', 'MetabolicReaction'}
G7596-MONOMER_mod_pydx5p	C2221H3532N601O655PS23	None	Complex		{}	{}	c	{'ComplexFormation', 'MetabolicReaction'}
ACETYLORNTRANSAM-CPLX_mod_pydx5p	C3926H6054N1069O1142PS30	None	Complex		{}	{}	c	{'ComplexFormation', 'MetabolicReaction'}
CARBODEHYDRAT-CPLX_mod_zn2	C2094H3336N606O614S22Zn	None	Complex		{}	{}	c	{'ComplexFormation', 'MetabolicReaction'}
ALKAPHOSPHA-CPLX_mod_zn2_mod_mg2	C4308H6900MgN1218O1392S26Zn	None	Complex		{}	{}	p	{'ComplexFormation', 'MetabolicReaction'}
THREODEHYD-CPLX_mod_zn2	C6644H10444N1808O1912S84Zn	None	Complex		{}	{}	c	{'ComplexFormation', 'MetabolicReaction'}
CPLX0-7741_mod_adocbl	C6936CoH10948N1924O2143PS50	None	Complex		{}	{}	c	{'ComplexFormation', 'MetabolicReaction'}
CPLX0-7719_mod_4fe4s	C3378Fe4H5322N922O1020S44	None	Complex		{}	{}	c	{'ComplexFormation', 'MetabolicReaction'}
EG12069-MONOMER_mod_fad	C2701H4269N748O822P2S18	None	Complex		{}	{}	c	{'ComplexFormation', 'MetabolicReaction'}
BETAGALACTOSID-CPLX_mod_mg2	C20776H31260MgN5812O6112S156	None	Complex		{}	{}	c	{'ComplexFormation', 'MetabolicReaction'}
PGMI-MONOMER_mod_mn2	C2484H3902MnN680O761S22	None	Complex		{}	{}	c	{'ComplexFormation', 'MetabolicReaction'}
UDPGLCNACEPIM-MONOMER_mod_nad	C1906H3023N529O565P2S14	None	Complex		{}	{}	c	{'ComplexFormation', 'MetabolicReaction'}
DTDPGLUCDEHYDRAT2-MONOMER_mod_nad	C1804H2751N490O545P2S10	None	Complex		{}	{}	c	{'ComplexFormation', 'MetabolicReaction'}
GDPMANDEHYDRA-CPLX_mod_nadp	C3787H5859N1017O1137P3S28	None	Complex		{}	{}	c	{'ComplexFormation', 'MetabolicReaction'}
SelA_deca_mod_10:pydx5p	C22290H36340N6440O6760P10S170	None	Complex		{}	{}	c	{'ComplexFormation', 'TranslationReaction'}
LTAA-CPLX_mod_pydx5p	C6428H10240N1845O1930PS60	None	Complex		{}	{}	c	{'ComplexFormation', 'MetabolicReaction'}
G6646-MONOMER_mod_pydx5p	C1998H3139N547O600PS16	None	Complex		{}	{}	c	{'ComplexFormation', 'MetabolicReaction'}
USHA-MONOMER_mod_zn2	C2709H4230N733O823S18Zn	None	Complex		{}	{}	p	{'ComplexFormation', 'MetabolicReaction'}
CPLX0-253_mod_fad	C2019H3037N529O583P2S14	None	Complex		{}	{}	c	{'ComplexFormation', 'MetabolicReaction'}
AROH-CPLX_mod_fe3	C3378FeH5414N990O1034S32	None	Complex		{}	{}	c	{'ComplexFormation', 'MetabolicReaction'}
GLYCRIBONUCSYN-MONOMER_mod_mg2	C2034H3192MgN554O619S19	None	Complex		{}	{}	c	{'ComplexFormation', 'MetabolicReaction'}
BRANCHED-CHAINAMINOTRANSFER-CPLX_mod_6:pydx5p	C9156H14088N2502O2742P6S60	None	Complex		{}	{}	c	{'ComplexFormation', 'MetabolicReaction'}
AERGLYC3PDEHYDROG-CPLX_mod_1:fad	C5111H7955N1437O1491P2S26	None	Complex		{}	{}	c	{'ComplexFormation', 'MetabolicReaction'}
SUCCORNTRANSAM-CPLX_mod_pydx5p	C3898H6026N1093O1160PS24	None	Complex		{}	{}	c	{'ComplexFormation', 'MetabolicReaction'}
ISOCITHASE-CPLX_mod_mn2	C4090H6482MnN1080O1218S38	None	Complex		{}	{}	c	{'ComplexFormation', 'MetabolicReaction'}
ISOCITHASE-CPLX_mod_mg2	C4090H6482MgN1080O1218S38	None	Complex		{}	{}	c	{'ComplexFormation', 'MetabolicReaction'}
CPLX0-250_FORMATEDEHYDROGH-MONOMER_mod_8:4fe4s_mod_2:2fe2s_mod_bmocogdp_mod_NiFeCoCN2	C21286Fe37H33577MoN5590NiO5838P4S278Se	None	Complex		{}	{}	im	{'ComplexFormation', 'MetabolicReaction'}
G6523-MONOMER_G6518-MONOMER_mod_fmn	C2673H4108N728O803PS34	None	Complex		{}	{}	c	{'ComplexFormation', 'MetabolicReaction'}
EG10370-MONOMER_mod_mn2	C1773H2924MnN519O549S12	None	Complex		{}	{}	c	{'ComplexFormation', 'MetabolicReaction'}
NITRATREDUCTA-CPLX_mod_bmocogdp_mod_3fe4s_mod_4fe4s	C10063Fe7H15453MoN2763O2937P4S106	None	Complex		{}	{}	im	{'ComplexFormation', 'MetabolicReaction'}
FLAVONADPREDUCT-MONOMER_mod_fad	C1264H1988N345O377P2S9	None	Complex		{}	{}	c	{'ComplexFormation', 'MetabolicReaction'}
NITRATREDUCTZ-CPLX_mod_bmocogdp_mod_2:pheme_mod_3:4fe4s_mod_1:3fe4s	C10174Fe17H15532MoN2777O2933P4S124	None	Complex		{}	{}	im	{'ComplexFormation', 'MetabolicReaction'}
GCVMULTI-CPLX_mod_lipo	C16132H25488N4421O4847S139	None	Complex		{}	{}	c	{'ComplexFormation', 'MetabolicReaction'}
IMIDHISTID-CPLX_mod_mn2	C3564H5592MnN996O1062S36	None	Complex		{}	{}	c	{'ComplexFormation', 'MetabolicReaction'}
CPLX0-341_mod_fmn	C22949H37303N6520O6837PS192	None	Complex		{}	{}	c	{'ComplexFormation', 'MetabolicReaction'}
CPLX0-341_mod_mg2	C22932H37284MgN6516O6828S192	None	Complex		{}	{}	c	{'ComplexFormation', 'MetabolicReaction'}
CPLX0-1261_mod_thmpp	C3279H5056N902O975P2S21	None	Complex		{}	{}	c	{'ComplexFormation', 'MetabolicReaction'}
PUTA-CPLX_mod_fad	C12741H20367N3615O3847P2S80	None	Complex		{}	{}	c	{'ComplexFormation', 'MetabolicReaction'}
CPLX0-7652_mod_mn2	C8396H13008MnN2360O2496S56	None	Complex		{}	{}	c	{'ComplexFormation', 'MetabolicReaction'}
CPLX0-7466_mod_mg2	C4666H7326MgN1304O1374S48	None	Complex		{}	{}	c	{'ComplexFormation', 'MetabolicReaction'}
CPLX0-7643_mod_mg2	C9560H15112MgN2568O2896S104	None	Complex		{}	{}	c	{'ComplexFormation', 'MetabolicReaction'}
CPLX0-7904_mod_ca2	C5984CaH9476N1572O1800S84	None	Complex		{}	{}	c	{'ComplexFormation', 'MetabolicReaction'}
CYSTATHIONINE-BETA-LYASE-CPLX_mod_pydx5p	C7728H12100N2117O2278PS60	None	Complex		{}	{}	c	{'ComplexFormation', 'MetabolicReaction'}
DHHB-METHYLTRANSFER-CPLX_mod_zn2	C2372H3710N654O688S22Zn	None	Complex		{}	{}	c	{'ComplexFormation', 'MetabolicReaction'}
DHPDIOXYGEN-CPLX_mod_fe2	C6160FeH9492N1668O1776S44	None	Complex		{}	{}	c	{'ComplexFormation', 'MetabolicReaction'}
GSP-CPLX_mod_mg2	C6358H9682MgN1700O1862S40	None	Complex		{}	{}	c	{'ComplexFormation', 'MetabolicReaction'}
GUANYL-KIN-CPLX_mod_mg2	C2086H3286MgN596O630S12	None	Complex		{}	{}	c	{'ComplexFormation', 'MetabolicReaction'}
LysII_RS_dim_mod_6:mg2	C5124H7970Mg6N1424O1542S36	None	Complex		{}	{}	c	{'GenericFormationReaction', 'ComplexFormation'}
LysII_RS_dim_mod_lys__L	C5130H7985N1426O1544S36	None	Complex		{}	{}	c	{'ComplexFormation', 'MetabolicReaction'}
LYXK-CPLX_mod_mg2	C4912H7564MgN1360O1434S52	None	Complex		{}	{}	c	{'ComplexFormation', 'MetabolicReaction'}
PDXK-CPLX_mod_zn2	C5516H8836N1472O1668S28Zn	None	Complex		{}	{}	c	{'ComplexFormation', 'MetabolicReaction'}
PDXK-CPLX_mod_mg2	C5516H8836MgN1472O1668S28	None	Complex		{}	{}	c	{'ComplexFormation', 'MetabolicReaction'}
Ser_RS_dim_mod_mg2	C4236H6752MgN1214O1306S38	None	Complex		{}	{}	c	{'tRNAChargingReaction', 'ComplexFormation'}
TYRB-DIMER_mod_pydx5p	C3908H6088N1057O1148PS32	None	Complex		{}	{}	c	{'ComplexFormation', 'MetabolicReaction'}
G6246-MONOMER_mod_mg2	C1349H2097MgN372O391S18	None	Complex		{}	{}	c	{'ComplexFormation', 'MetabolicReaction'}
DIHYDROOROTOX-MONOMER_mod_fmn	C1659H2673N456O490PS11	None	Complex		{}	{}	c	{'ComplexFormation', 'MetabolicReaction'}
TDK-MONOMER_mod_mg2	C1034H1616MgN290O314S10	None	Complex		{}	{}	c	{'ComplexFormation', 'MetabolicReaction'}
GARTRANSFORMYL2-MONOMER_mod_mg2	C1872H3000MgN530O559S13	None	Complex		{}	{}	c	{'ComplexFormation', 'MetabolicReaction'}
UXAC-MONOMER_mod_zn2	C2403H3671N666O707S24Zn	None	Complex		{}	{}	c	{'ComplexFormation', 'MetabolicReaction'}
SPOT-MONOMER_mod_mn2	C3505H5659MnN1013O1023S31	None	Complex		{}	{}	c	{'ComplexFormation', 'MetabolicReaction'}
6PFK-1-CPX_mod_mg2	C6128H9804MgN1712O1848S72	None	Complex		{}	{}	c	{'ComplexFormation', 'MetabolicReaction'}
ASPAMINOTRANS-DIMER_mod_pydx5p	C3880H6052N1073O1174PS26	None	Complex		{}	{}	c	{'ComplexFormation', 'MetabolicReaction'}
BRANCHED-CHAINAMINOTRANSFER-CPLX_mod_pydx5p	C9116H14048N2497O2712PS60	None	Complex		{}	{}	c	{'ComplexFormation', 'MetabolicReaction'}
USHA-MONOMER_mod_cobalt2	C2709CoH4230N733O823S18	None	Complex		{}	{}	p	{'ComplexFormation', 'MetabolicReaction'}
CMPKI-MONOMER_mod_mg2	C1090H1773MgN318O328S5	None	Complex		{}	{}	c	{'ComplexFormation', 'MetabolicReaction'}
MiaB_mono_mod_1:4fe4s	C2363Fe4H3735N660O726S24	None	Complex		{}	{}	c	{'tRNAChargingReaction', 'ComplexFormation'}
RumB_mono_mod_1:4fe4s	C1883Fe4H2965N507O530S28	None	Complex		{}	{}	c	{'ComplexFormation'}
RumA_mono_mod_1:4fe4s	C2113Fe4H3403N612O623S22	None	Complex		{}	{}	c	{'ComplexFormation'}
rpL7/12_mod_1:acetyl	C1070H1782N276O353S6	None	Complex		{}	{}	c	{'ComplexFormation'}
Def_mono_mod_1:fe2	C844FeH1394N241O255S6	None	Complex		{}	{}	c	{'ComplexFormation', 'TranslationReaction'}
Map_mono_mod_2:fe2	C1286Fe2H2062N352O391S15	None	Complex		{}	{}	c	{'ComplexFormation', 'TranslationReaction'}
Mfd_mono_mod_1:mg2	C5779H9165MgN1640O1697S37	None	Complex		{}	{}	c	{'TranscriptionReaction', 'ComplexFormation'}
Rnb_mono_mod_1:mg2	C3224H5081MgN906O952S22	None	Complex		{}	{}	c	{'GenericFormationReaction', 'ComplexFormation'}
RluD_mono_mod_1:mg2	C1637H2610MgN480O474S12	None	Complex		{}	{}	c	{'ComplexFormation'}
RpoZ_mono_mod_1:mg2	C430H722MgN136O142S	None	Complex		{}	{}	c	{'TranscriptionReaction', 'ComplexFormation'}
RNase_III_dim_mod_2:mg2	C2248H3620Mg2N658O682S10	None	Complex		{}	{}	c	{'ComplexFormation'}
RNase_P_cplx_mod_2:mg2	C4162H5092Mg2N1559O2828P377S3	None	Complex		{}	{}	c	{'ComplexFormation'}
Orn_dim_mod_2:mg2	C1842H2858Mg2N502O558S12	None	Complex		{}	{}	c	{'ComplexFormation'}
MiaA_dim_mod_2:mg2	C3122H4954Mg2N878O918S20	None	Complex		{}	{}	c	{'tRNAChargingReaction', 'ComplexFormation'}
Rho_hexa_mod_3:mg2	C12444H20268Mg3N3516O3726S102	None	Complex		{}	{}	c	{'TranscriptionReaction', 'ComplexFormation'}
RNase_T_dim_mod_4:mg2	C2092H3208Mg4N572O622S22	None	Complex		{}	{}	c	{'GenericFormationReaction', 'ComplexFormation'}
Rnd_mono_mod_5:mg2	C1921H3008Mg5N517O552S17	None	Complex		{}	{}	c	{'GenericFormationReaction', 'ComplexFormation'}
hRNAP_mod_1:zn2_mod_2:mg2	C16671H26945Mg2N4683O5133S113Zn	None	Complex		{}	{}	c	{'ComplexFormation'}
RNase_E_tetra_mod_2:zn2	C20508H33032N6216O6480S72Zn2	None	Complex		{}	{}	c	{'ComplexFormation'}
RrmA_dim_mod_2:zn2	C2712H4208N760O772S32Zn2	None	Complex		{}	{}	c	{'ComplexFormation'}
RNase_BN_dim_mod_2:zn2	C2934H4624N808O874S20Zn2	None	Complex		{}	{}	c	{'GenericFormationReaction', 'ComplexFormation'}
TadA_dim_mod_2:zn2	C1630H2602N496O470S24Zn2	None	Complex		{}	{}	c	{'tRNAChargingReaction', 'ComplexFormation'}
DnaJ_dim_mod_4:zn2	C3558H5638N1066O1098S32Zn4	None	Complex		{}	{}	c	{'ComplexFormation', 'TranslationReaction'}
Tgt_hexa_mod_6:zn2	C11316H17628N3186O3312S132Zn6	None	Complex		{}	{}	c	{'tRNAChargingReaction', 'ComplexFormation'}
RlmN_mono_mod_1:4fe4s	C1886Fe4H3048N538O570S26	None	Complex		{}	{}	c	{'ComplexFormation'}
MnmC_mono_mod_fad	C3347H5099N929O993P2S28	None	Complex		{}	{}	c	{'tRNAChargingReaction', 'ComplexFormation'}
MnmEG_cplx_mod_fad_mod_2:k	C10491H16777K2N3007O3201P2S60	None	Complex		{}	{}	c	{'tRNAChargingReaction', 'ComplexFormation'}
Rph_mono_mod_mg2	C1053H1731MgN307O336S11	None	Complex		{}	{}	c	{'GenericFormationReaction', 'ComplexFormation'}
NAPAB-CPLX_NAPC-MONOMER_mod_bmocogdp	C5934H9179MoN1672O1733P4S67	None	Complex		{}	{}	m	{'ComplexFormation', 'MetabolicReaction'}
NAP-CPLX_mod_bmocogdp	C8447H13205MoN2390O2437P4S106	None	Complex		{}	{}	m	{'ComplexFormation', 'MetabolicReaction'}
CPLX0-7838_CPLX0-7839_mod_pydx5p	C5288H8300N1451O1578PS34	None	Complex		{}	{}	c	{'ComplexFormation', 'MetabolicReaction'}
GLUCDEHYDROG-MONOMER_mod_pqq	C3954H6031N1026O1133S31	None	Complex		{}	{}	im	{'ComplexFormation', 'MetabolicReaction'}
YdaO_dim_mod_4fe4s	C3134Fe4H5002N876O934S42	None	Complex		{}	{}	c	{'tRNAChargingReaction', 'ComplexFormation'}
ATPSYN-CPLX_EG10106-MONOMER_mod_mg2	C24273H39113MgN6490O7130S217	None	Complex		{}	{}	im	{'ComplexFormation', 'MetabolicReaction'}
QueG_mono_mod_2:4fe4s	C1929Fe8H3065N539O543S26	None	Complex		{}	{}	c	{'tRNAChargingReaction', 'ComplexFormation'}
PYRUVFORMLY-INACTIVE-CPLX_mod_glycyl	C7568H11827N2046O2290S72	None	Complex		{}	{}	c	{'ComplexFormation', 'MetabolicReaction'}
PYRUVFORMLY-MONOMER_EG11784-MONOMER_mod_glycyl	C4415H6925N1199O1342S38	None	Complex		{}	{}	c	{'ComplexFormation', 'MetabolicReaction'}
KETOBUTFORMLY-INACT-MONOMER_mod_glycyl	C3835H5941N1040O1148S29	None	Complex		{}	{}	c	{'ComplexFormation', 'MetabolicReaction'}
EG11910-MONOMER_dimer_EG11911-MONOMER_mod_glycyl	C9077H14318N2522O2708S69	None	Complex		{}	{}	c	{'ComplexFormation', 'MetabolicReaction'}
ADCLY-CPLX_mod_pydx5p	C2602H4162N747O790PS34	None	Complex		{}	{}	c	{'ComplexFormation', 'MetabolicReaction'}
CYT-O-UBIOX-CPLX_mod_pheme_mod_hemeO_mod_cu2	C6806CuFe2H10237N1638O1731S80	None	Complex		{}	{}	im	{'ComplexFormation', 'MetabolicReaction'}
CPLX_dummy	C1512H2381N410O437S13	None	Complex		{}	{}	c	{'ComplexFormation', 'MetabolicReaction'}
RNA_degradosome	C40683H65406Mg6N11875O12685S200Zn2	None	Complex		{}	{}	c	{'TranscriptionReaction', 'ComplexFormation', 'TranslationReaction'}
rRNA_containing_excision_machinery	C33860H52738Mg8N10393O12096P377S143Zn2	None	Complex		{}	{}	c	{'TranscriptionReaction', 'ComplexFormation'}
monocistronic_excision_machinery	C24670H38124Mg2N7775O9308P377S75Zn2	None	Complex		{}	{}	c	{'TranscriptionReaction', 'ComplexFormation'}
polycistronic_wout_rRNA_excision_machinery	C33860H52738Mg6N10393O12096P377S143Zn2	None	Complex		{}	{}	c	{'TranscriptionReaction', 'ComplexFormation'}

## Sheet: Metabolite
id	formula	charge	met_type	name	notes	annotation	compartment	reaction_involvement
10fthf_c	C20H21N7O7	-2	Metabolite	10-Formyltetrahydrofolate	{}	{}	c	{'MetabolicReaction', 'SummaryVariable', 'TranslationReaction'}
12dgr120_c	C27H52O5	0	Metabolite	1,2-Diacyl-sn-glycerol (didodecanoyl, n-C12:0)	{}	{}	c	{'MetabolicReaction'}
12dgr140_c	C31H60O5	0	Metabolite	1,2-Diacyl-sn-glycerol (ditetradecanoyl, n-C14:0)	{}	{}	c	{'MetabolicReaction'}
12dgr141_c	C31H56O5	0	Metabolite	1,2-Diacyl-sn-glycerol (ditetradec-7-enoyl, n-C14:1)	{}	{}	c	{'MetabolicReaction'}
12dgr160_c	C35H68O5	0	Metabolite	1,2-Diacyl-sn-glycerol (dihexadecanoyl, n-C16:0)	{}	{}	c	{'MetabolicReaction'}
12dgr161_c	C35H64O5	0	Metabolite	1,2-Diacyl-sn-glycerol (dihexadec-9-enoyl, n-C16:1)	{}	{}	c	{'MetabolicReaction'}
12dgr180_c	C39H76O5	0	Metabolite	1,2-Diacyl-sn-glycerol (dioctadecanoyl, n-C18:0)	{}	{}	c	{'MetabolicReaction'}
12dgr181_c	C39H72O5	0	Metabolite	1,2-Diacyl-sn-glycerol (dioctadec-11-enoyl, n-C18:1)	{}	{}	c	{'MetabolicReaction'}
12ppd__R_c	C3H8O2	0	Metabolite	(R)-Propane-1,2-diol	{}	{}	c	{'MetabolicReaction'}
12ppd__S_c	C3H8O2	0	Metabolite	(S)-Propane-1,2-diol	{}	{}	c	{'MetabolicReaction'}
13dpg_c	C3H4O10P2	-4	Metabolite	3-Phospho-D-glyceroyl phosphate	{}	{}	c	{'MetabolicReaction'}
14dhncoa_c	C32H38N7O19P3S	-4	Metabolite	1,4-dihydroxy-2-napthoyl-CoA	{}	{}	c	{'MetabolicReaction'}
14glucan_c	C36H62O31	0	Metabolite	1,4-alpha-D-glucan	{}	{}	c	{'MetabolicReaction'}
15dap_c	C5H16N2	2	Metabolite	1,5-Diaminopentane	{}	{}	c	{'MetabolicReaction'}
1ddecg3p_c	C15H29O7P1	-2	Metabolite	1-dodecanoyl-sn-glycerol 3-phosphate	{}	{}	c	{'MetabolicReaction'}
1hdec9eg3p_c	C19H35O7P1	-2	Metabolite	1-hexadec-9-enoyl-sn-glycerol 3-phosphate	{}	{}	c	{'MetabolicReaction'}
1hdecg3p_c	C19H37O7P1	-2	Metabolite	1-hexadecanoyl-sn-glycerol 3-phosphate	{}	{}	c	{'MetabolicReaction'}
1odec11eg3p_c	C21H39O7P1	-2	Metabolite	1-octadec-11-enoyl-sn-glycerol 3-phosphate	{}	{}	c	{'MetabolicReaction'}
1odecg3p_c	C21H41O7P1	-2	Metabolite	1-octadecanoyl-sn-glycerol 3-phosphate	{}	{}	c	{'MetabolicReaction'}
1pyr5c_c	C5H6NO2	-1	Metabolite	1-Pyrroline-5-carboxylate	{}	{}	c	{'MetabolicReaction'}
1tdec7eg3p_c	C17H31O7P1	-2	Metabolite	1-tetradec-7-enoyl-sn-glycerol 3-phosphate	{}	{}	c	{'MetabolicReaction'}
1tdecg3p_c	C17H33O7P1	-2	Metabolite	1-tetradecanoyl-sn-glycerol 3-phosphate	{}	{}	c	{'MetabolicReaction'}
23dappa_c	C3H9N2O2	1	Metabolite	2,3-diaminopropionate	{}	{}	c	{'MetabolicReaction'}
23ddhb_c	C7H7O4	-1	Metabolite	2,3-Dihydro-2,3-dihydroxybenzoate	{}	{}	c	{'MetabolicReaction'}
23dhacoa_c	C27H37N7O19P3S	-5	Metabolite	2,3-dehydroadipyl-CoA	{}	{}	c	{'MetabolicReaction'}
23dhb_c	C7H5O4	-1	Metabolite	2,3-Dihydroxybenzoate	{}	{}	c	{'MetabolicReaction'}
23dhba_c	C17H17N5O10P	-1	Metabolite	(2,3-Dihydroxybenzoyl)adenylate	{}	{}	c	{'MetabolicReaction'}
23dhbzs_c	C10H10NO6	-1	Metabolite	2,3-dihydroxybenzoylserine	{}	{}	c	{'MetabolicReaction'}
23dhdp_c	C7H5NO4	-2	Metabolite	2,3-Dihydrodipicolinate	{}	{}	c	{'MetabolicReaction'}
23dhmb_c	C5H9O4	-1	Metabolite	(R)-2,3-Dihydroxy-3-methylbutanoate	{}	{}	c	{'MetabolicReaction'}
23dhmp_c	C6H11O4	-1	Metabolite	(R)-2,3-Dihydroxy-3-methylpentanoate	{}	{}	c	{'MetabolicReaction'}
23doguln_c	C6H7O7	-1	Metabolite	2,3-Dioxo-L-gulonate	{}	{}	c	{'MetabolicReaction'}
25aics_c	C13H15N4O12P	-4	Metabolite	(S)-2-[5-Amino-1-(5-phospho-D-ribosyl)imidazole-4-carboxamido]succinate	{}	{}	c	{'MetabolicReaction'}
25dkglcn_c	C6H7O7	-1	Metabolite	2,5-diketo-D-gluconate	{}	{}	c	{'MetabolicReaction'}
25drapp_c	C9H14N5O8P	-2	Metabolite	2,5-Diamino-6-(ribosylamino)-4-(3H)-pyrimidinone 5'-phosphate	{}	{}	c	{'MetabolicReaction'}
26dap__LL_c	C7H14N2O4	0	Metabolite	LL-2,6-Diaminoheptanedioate	{}	{}	c	{'MetabolicReaction'}
26dap__M_c	C7H14N2O4	0	Metabolite	meso-2,6-Diaminoheptanedioate	{}	{}	c	{'MetabolicReaction'}
2agpe120_c	C17H36NO7P1	0	Metabolite	2-Acyl-sn-glycero-3-phosphoethanolamine (n-C12:0)	{}	{}	c	{'MetabolicReaction'}
2agpe140_c	C19H40NO7P1	0	Metabolite	2-Acyl-sn-glycero-3-phosphoethanolamine (n-C14:0)	{}	{}	c	{'MetabolicReaction'}
2agpe141_c	C19H38NO7P1	0	Metabolite	2-Acyl-sn-glycero-3-phosphoethanolamine (n-C14:1)	{}	{}	c	{'MetabolicReaction'}
2agpe160_c	C21H44NO7P1	0	Metabolite	2-Acyl-sn-glycero-3-phosphoethanolamine (n-C16:0)	{}	{}	c	{'MetabolicReaction'}
2agpe161_c	C21H42NO7P1	0	Metabolite	2-Acyl-sn-glycero-3-phosphoethanolamine (n-C16:1)	{}	{}	c	{'MetabolicReaction'}
2agpe180_c	C23H48NO7P1	0	Metabolite	2-Acyl-sn-glycero-3-phosphoethanolamine (n-C18:0)	{}	{}	c	{'MetabolicReaction'}
2agpe181_c	C23H46NO7P1	0	Metabolite	2-Acyl-sn-glycero-3-phosphoethanolamine (n-C18:1)	{}	{}	c	{'MetabolicReaction'}
2agpg120_c	C18H36O9P1	-1	Metabolite	2-Acyl-sn-glycero-3-phosphoglycerol (n-C12:0)	{}	{}	c	{'MetabolicReaction'}
2agpg140_c	C20H40O9P1	-1	Metabolite	2-Acyl-sn-glycero-3-phosphoglycerol (n-C14:0)	{}	{}	c	{'MetabolicReaction'}
2agpg141_c	C20H38O9P1	-1	Metabolite	2-Acyl-sn-glycero-3-phosphoglycerol (n-C14:1)	{}	{}	c	{'MetabolicReaction'}
2agpg160_c	C22H44O9P1	-1	Metabolite	2-Acyl-sn-glycero-3-phosphoglycerol (n-C16:0)	{}	{}	c	{'MetabolicReaction'}
2agpg161_c	C22H42O9P1	-1	Metabolite	2-Acyl-sn-glycero-3-phosphoglycerol (n-C16:1)	{}	{}	c	{'MetabolicReaction'}
2agpg180_c	C24H48O9P1	-1	Metabolite	2-Acyl-sn-glycero-3-phosphoglycerol (n-C18:0)	{}	{}	c	{'MetabolicReaction'}
2agpg181_c	C24H46O9P1	-1	Metabolite	2-Acyl-sn-glycero-3-phosphoglycerol (n-C18:1)	{}	{}	c	{'MetabolicReaction'}
2ahbut_c	C6H9O4	-1	Metabolite	(S)-2-Aceto-2-hydroxybutanoate	{}	{}	c	{'MetabolicReaction'}
2amsa_c	C3H5NO3	0	Metabolite	2-Aminomalonate semialdehyde	{}	{}	c	{'MetabolicReaction'}
2aobut_c	C4H7NO3	0	Metabolite	L-2-Amino-3-oxobutanoate	{}	{}	c	{'MetabolicReaction'}
2cpr5p_c	C12H13NO9P	-3	Metabolite	1-(2-Carboxyphenylamino)-1-deoxy-D-ribulose 5-phosphate	{}	{}	c	{'MetabolicReaction'}
2dda7p_c	C7H10O10P	-3	Metabolite	2-Dehydro-3-deoxy-D-arabino-heptonate 7-phosphate	{}	{}	c	{'MetabolicReaction'}
2ddecg3p_c	C15H30O7P1	-1	Metabolite	2-dodecanoyl-sn-glycerol 3-phosphate	{}	{}	c	{'MetabolicReaction'}
2ddg6p_c	C6H8O9P	-3	Metabolite	2-Dehydro-3-deoxy-D-gluconate 6-phosphate	{}	{}	c	{'MetabolicReaction'}
2ddglcn_c	C6H9O6	-1	Metabolite	2-Dehydro-3-deoxy-D-gluconate	{}	{}	c	{'MetabolicReaction'}
2dh3dgal_c	C6H9O6	-1	Metabolite	2-Dehydro-3-deoxy-D-galactonate	{}	{}	c	{'MetabolicReaction'}
2dh3dgal6p_c	C6H8O9P	-3	Metabolite	2-Dehydro-3-deoxy-D-galactonate 6-phosphate	{}	{}	c	{'MetabolicReaction'}
2dhguln_c	C6H9O7	-1	Metabolite	2-Dehydro-L-gulonate	{}	{}	c	{'MetabolicReaction'}
2dhp_c	C6H9O4	-1	Metabolite	2-Dehydropantoate	{}	{}	c	{'MetabolicReaction'}
2dmmq8_c	C50H70O2	0	Metabolite	2-Demethylmenaquinone 8	{}	{}	c	{'MetabolicReaction'}
2dmmql8_c	C50H72O2	0	Metabolite	2-Demethylmenaquinol 8	{}	{}	c	{'MetabolicReaction'}
2dr1p_c	C5H9O7P	-2	Metabolite	2-Deoxy-D-ribose 1-phosphate	{}	{}	c	{'MetabolicReaction'}
2dr5p_c	C5H9O7P	-2	Metabolite	2-Deoxy-D-ribose 5-phosphate	{}	{}	c	{'MetabolicReaction'}
2h3oppan_c	C3H3O4	-1	Metabolite	2-Hydroxy-3-oxopropanoate	{}	{}	c	{'MetabolicReaction'}
2hdec9eg3p_c	C19H36O7P1	-1	Metabolite	2-hexadec-9-enoyl-sn-glycerol 3-phosphate	{}	{}	c	{'MetabolicReaction'}
2hdecg3p_c	C19H38O7P1	-1	Metabolite	2-hexadecanoyl-sn-glycerol 3-phosphate	{}	{}	c	{'MetabolicReaction'}
2ippm_c	C7H8O4	-2	Metabolite	2-Isopropylmaleate	{}	{}	c	{'MetabolicReaction'}
2mahmp_c	C6H8N3O7P2	-3	Metabolite	2-Methyl-4-amino-5-hydroxymethylpyrimidine diphosphate	{}	{}	c	{'MetabolicReaction'}
2mcacn_c	C7H5O6	-3	Metabolite	cis-2-Methylaconitate	{}	{}	c	{'MetabolicReaction'}
2mcit_c	C7H7O7	-3	Metabolite	2-Methylcitrate	{}	{}	c	{'MetabolicReaction'}
2me4p_c	C5H11O7P	-2	Metabolite	2-C-methyl-D-erythritol 4-phosphate	{}	{}	c	{'MetabolicReaction'}
2mecdp_c	C5H10O9P2	-2	Metabolite	2-C-methyl-D-erythritol 2,4-cyclodiphosphate	{}	{}	c	{'MetabolicReaction'}
2obut_c	C4H5O3	-1	Metabolite	2-Oxobutanoate	{}	{}	c	{'MetabolicReaction'}
2odec11eg3p_c	C21H40O7P1	-1	Metabolite	2-octadec-11-enoyl-sn-glycerol 3-phosphate	{}	{}	c	{'MetabolicReaction'}
2odecg3p_c	C21H42O7P1	-1	Metabolite	2-octadecanoyl-sn-glycerol 3-phosphate	{}	{}	c	{'MetabolicReaction'}
2ohph_c	C46H70O2	0	Metabolite	2-Octaprenyl-6-hydroxyphenol	{}	{}	c	{'MetabolicReaction', 'SummaryVariable'}
2ombzl_c	C47H72O3	0	Metabolite	2-Octaprenyl-6-methoxy-1,4-benzoquinol	{}	{}	c	{'MetabolicReaction'}
2omhmbl_c	C48H74O4	0	Metabolite	2-Octaprenyl-3-methyl-5-hydroxy-6-methoxy-1,4-benzoquinol	{}	{}	c	{'MetabolicReaction'}
2ommbl_c	C48H74O3	0	Metabolite	2-Octaprenyl-3-methyl-6-methoxy- 1,4-benzoquinol	{}	{}	c	{'MetabolicReaction'}
2omph_c	C47H72O2	0	Metabolite	2-Octaprenyl-6-methoxyphenol	{}	{}	c	{'MetabolicReaction'}
2oph_c	C46H70O	0	Metabolite	2-Octaprenylphenol	{}	{}	c	{'MetabolicReaction'}
2oxpaccoa_c	C29H38N7O18P3S	-4	Metabolite	2-oxepin-2(3H)-ylideneacetyl-CoA	{}	{}	c	{'MetabolicReaction'}
2p4c2me_c	C14H22N3O17P3	-4	Metabolite	2-phospho-4-(cytidine 5'-diphospho)-2-C-methyl-D-erythritol	{}	{}	c	{'MetabolicReaction'}
2pg_c	C3H4O7P	-3	Metabolite	D-Glycerate 2-phosphate	{}	{}	c	{'MetabolicReaction'}
2pglyc_c	C2H2O6P	-3	Metabolite	2-Phosphoglycolate	{}	{}	c	{'MetabolicReaction'}
2sephchc_c	C14H13O9	-3	Metabolite	2-succinyl-5-enolpyruvyl-6-hydroxy-3-cyclohexene-1-carboxylate	{}	{}	c	{'MetabolicReaction'}
2shchc_c	C11H10O6	-2	Metabolite	2-Succinyl-6-hydroxy-2,4-cyclohexadiene-1-carboxylate	{}	{}	c	{'MetabolicReaction'}
2tdec7eg3p_c	C17H32O7P1	-1	Metabolite	2-tetradec-7-enoyl-sn-glycerol 3-phosphate	{}	{}	c	{'MetabolicReaction'}
2tdecg3p_c	C17H34O7P1	-1	Metabolite	2-tetradecanoyl-sn-glycerol 3-phosphate	{}	{}	c	{'MetabolicReaction'}
2tpr3dpcoa_c	C26H40N7O26P5S	-6	Metabolite	2'-(5''-triphosphoribosyl)-3'-dephospho-CoA	{}	{}	c	{'MetabolicReaction'}
34hpp_c	C9H7O4	-1	Metabolite	3-(4-Hydroxyphenyl)pyruvate	{}	{}	c	{'MetabolicReaction'}
35cgmp_c	C10H11N5O7P	-1	Metabolite	3',5'-Cyclic GMP	{}	{}	c	{'MetabolicReaction'}
3amac_c	C3H4NO2	-1	Metabolite	3-Aminoacrylate	{}	{}	c	{'MetabolicReaction'}
3c2hmp_c	C7H10O5	-2	Metabolite	3-Carboxy-2-hydroxy-4-methylpentanoate	{}	{}	c	{'MetabolicReaction'}
3c3hmp_c	C7H10O5	-2	Metabolite	3-Carboxy-3-hydroxy-4-methylpentanoate	{}	{}	c	{'MetabolicReaction'}
3c4mop_c	C7H8O5	-2	Metabolite	3-Carboxy-4-methyl-2-oxopentanoate	{}	{}	c	{'MetabolicReaction'}
3dhguln_c	C6H9O7	-1	Metabolite	3-Dehydro-L-gulonate	{}	{}	c	{'MetabolicReaction'}
3dhgulnp_c	C6H8O10P	-3	Metabolite	3-keto-L-gulonate-6-phosphate	{}	{}	c	{'MetabolicReaction'}
3dhq_c	C7H9O6	-1	Metabolite	3-Dehydroquinate	{}	{}	c	{'MetabolicReaction'}
3dhsk_c	C7H7O5	-1	Metabolite	3-Dehydroshikimate	{}	{}	c	{'MetabolicReaction'}
3hadpcoa_c	C27H39N7O20P3S	-5	Metabolite	(3S)-3-Hydroxyadipyl-CoA	{}	{}	c	{'MetabolicReaction'}
3hbcoa_c	C25H38N7O18P3S	-4	Metabolite	(S)-3-Hydroxybutanoyl-CoA	{}	{}	c	{'MetabolicReaction'}
3hcinnm_c	C9H7O3	-1	Metabolite	3-hydroxycinnamic acid	{}	{}	c	{'MetabolicReaction'}
3hdcoa_c	C31H50N7O18P3S	-4	Metabolite	(S)-3-Hydroxydecanoyl-CoA	{}	{}	c	{'MetabolicReaction'}
3hddcoa_c	C33H54N7O18P3S	-4	Metabolite	(S)-3-Hydroxydodecanoyl-CoA	{}	{}	c	{'MetabolicReaction'}
3hhcoa_c	C27H42N7O18P3S	-4	Metabolite	(S)-3-Hydroxyhexanoyl-CoA	{}	{}	c	{'MetabolicReaction'}
3hhdcoa_c	C37H62N7O18P3S	-4	Metabolite	(S)-3-Hydroxyhexadecanoyl-CoA	{}	{}	c	{'MetabolicReaction'}
3hocoa_c	C29H46N7O18P3S	-4	Metabolite	(S)-3-Hydroxyoctanoyl-CoA	{}	{}	c	{'MetabolicReaction'}
3hodcoa_c	C39H66N7O18P3S	-4	Metabolite	(S)-3-Hydroxyoctadecanoyl-CoA	{}	{}	c	{'MetabolicReaction'}
3hpp_c	C3H5O3	-1	Metabolite	3-Hydroxypropanoate	{}	{}	c	{'MetabolicReaction'}
3hpppn_c	C9H9O3	-1	Metabolite	3-(3-hydroxy-phenyl)propionate	{}	{}	c	{'MetabolicReaction'}
3htdcoa_c	C35H58N7O18P3S	-4	Metabolite	(S)-3-Hydroxytetradecanoyl-CoA	{}	{}	c	{'MetabolicReaction'}
3ig3p_c	C11H12NO6P	-2	Metabolite	C'-(3-Indolyl)-glycerol 3-phosphate	{}	{}	c	{'MetabolicReaction'}
3mob_c	C5H7O3	-1	Metabolite	3-Methyl-2-oxobutanoate	{}	{}	c	{'MetabolicReaction'}
3mop_c	C6H9O3	-1	Metabolite	(S)-3-Methyl-2-oxopentanoate	{}	{}	c	{'MetabolicReaction'}
3odcoa_c	C31H48N7O18P3S	-4	Metabolite	3-Oxodecanoyl-CoA	{}	{}	c	{'MetabolicReaction'}
3oddcoa_c	C33H52N7O18P3S	-4	Metabolite	3-Oxododecanoyl-CoA	{}	{}	c	{'MetabolicReaction'}
3ohcoa_c	C27H40N7O18P3S	-4	Metabolite	3-Oxohexanoyl-CoA	{}	{}	c	{'MetabolicReaction'}
3ohdcoa_c	C37H60N7O18P3S	-4	Metabolite	3-Oxohexadecanoyl-CoA	{}	{}	c	{'MetabolicReaction'}
3oocoa_c	C29H44N7O18P3S	-4	Metabolite	3-Oxooctanoyl-CoA	{}	{}	c	{'MetabolicReaction'}
3oodcoa_c	C39H64N7O18P3S	-4	Metabolite	3-Oxooctadecanoyl-CoA	{}	{}	c	{'MetabolicReaction'}
3ophb_c	C47H69O3	-1	Metabolite	3-Octaprenyl-4-hydroxybenzoate	{}	{}	c	{'MetabolicReaction'}
3otdcoa_c	C35H56N7O18P3S	-4	Metabolite	3-Oxotetradecanoyl-CoA	{}	{}	c	{'MetabolicReaction'}
3oxdhscoa_c	C29H39N7O20P3S	-5	Metabolite	3-oxo-5,6-dehydrosuberyl-CoA	{}	{}	c	{'MetabolicReaction'}
3pg_c	C3H4O7P	-3	Metabolite	3-Phospho-D-glycerate	{}	{}	c	{'MetabolicReaction'}
3php_c	C3H2O7P	-3	Metabolite	3-Phosphohydroxypyruvate	{}	{}	c	{'MetabolicReaction'}
3psme_c	C10H9O10P	-4	Metabolite	5-O-(1-Carboxyvinyl)-3-phosphoshikimate	{}	{}	c	{'MetabolicReaction'}
3sala_c	C3H5NO4S	-2	Metabolite	3-Sulfino-L-alanine	{}	{}	c	{'MetabolicReaction'}
4abut_c	C4H9NO2	0	Metabolite	4-Aminobutanoate	{}	{}	c	{'MetabolicReaction'}
4abutn_c	C4H10NO	1	Metabolite	4-Aminobutanal	{}	{}	c	{'MetabolicReaction'}
4abz_c	C7H6NO2	-1	Metabolite	4-Aminobenzoate	{}	{}	c	{'MetabolicReaction'}
4adcho_c	C10H10NO5	-1	Metabolite	4-amino-4-deoxychorismate	{}	{}	c	{'MetabolicReaction'}
4ahmmp_c	C6H9N3O	0	Metabolite	4-Amino-5-hydroxymethyl-2-methylpyrimidine	{}	{}	c	{'MetabolicReaction'}
4ampm_c	C6H8N3O4P	-2	Metabolite	4-Amino-2-methyl-5-phosphomethylpyrimidine	{}	{}	c	{'MetabolicReaction'}
4c2me_c	C14H23N3O14P2	-2	Metabolite	4-(cytidine 5'-diphospho)-2-C-methyl-D-erythritol	{}	{}	c	{'MetabolicReaction'}
4crsol_c	C7H8O	0	Metabolite	p-Cresol	{}	{}	c	{'MetabolicReaction', 'MEReaction'}
4h2opntn_c	C5H7O4	-1	Metabolite	4-Hydroxy-2-oxopentanoate	{}	{}	c	{'MetabolicReaction'}
4hbz_c	C7H5O3	-1	Metabolite	4-Hydroxybenzoate	{}	{}	c	{'MetabolicReaction'}
4hthr_c	C4H9NO4	0	Metabolite	4-Hydroxy-L-threonine	{}	{}	c	{'MetabolicReaction'}
4mhetz_c	C6H9NOS	0	Metabolite	4-Methyl-5-(2-hydroxyethyl)-thiazole	{}	{}	c	{'MetabolicReaction'}
4mop_c	C6H9O3	-1	Metabolite	4-Methyl-2-oxopentanoate	{}	{}	c	{'MetabolicReaction'}
4mpetz_c	C6H8NO4PS	-2	Metabolite	4-Methyl-5-(2-phosphoethyl)-thiazole	{}	{}	c	{'MetabolicReaction'}
4pasp_c	C4H6NO7P	-2	Metabolite	4-Phospho-L-aspartate	{}	{}	c	{'MetabolicReaction'}
4per_c	C4H6O8P	-3	Metabolite	4-Phospho-D-erythronate	{}	{}	c	{'MetabolicReaction'}
4ppan_c	C9H15NO8P	-3	Metabolite	D-4'-Phosphopantothenate	{}	{}	c	{'MetabolicReaction'}
4ppcys_c	C12H20N2O9PS	-3	Metabolite	N-((R)-4-Phosphopantothenoyl)-L-cysteine	{}	{}	c	{'MetabolicReaction'}
4r5au_c	C9H16N4O6	0	Metabolite	4-(1-D-Ribitylamino)-5-aminouracil	{}	{}	c	{'MetabolicReaction'}
56dura_c	C4H6N2O2	0	Metabolite	5,6-dihydrouracil	{}	{}	c	{'MetabolicReaction'}
5aizc_c	C9H11N3O9P	-3	Metabolite	5-amino-1-(5-phospho-D-ribosyl)imidazole-4-carboxylate	{}	{}	c	{'MetabolicReaction'}
5aop_c	C5H9NO3	0	Metabolite	5-Amino-4-oxopentanoate	{}	{}	c	{'MetabolicReaction'}
5aprbu_c	C9H15N4O9P	-2	Metabolite	5-Amino-6-(5'-phosphoribitylamino)uracil	{}	{}	c	{'MetabolicReaction'}
5apru_c	C9H13N4O9P	-2	Metabolite	5-Amino-6-(5'-phosphoribosylamino)uracil	{}	{}	c	{'MetabolicReaction'}
5caiz_c	C9H11N3O9P	-3	Metabolite	5-phosphoribosyl-5-carboxyaminoimidazole	{}	{}	c	{'MetabolicReaction'}
5dglcn_c	C6H9O7	-1	Metabolite	5-Dehydro-D-gluconate	{}	{}	c	{'MetabolicReaction'}
5dh4dglc_c	C6H6O7	-2	Metabolite	5-Dehydro-4-deoxy-D-glucarate	{}	{}	c	{'MetabolicReaction'}
5drib_c	C5H10O4	0	Metabolite	5'-deoxyribose	{}	{}	c	{'MetabolicReaction', 'MEReaction'}
5fthf_c	C20H21N7O7	-2	Metabolite	5-Formyltetrahydrofolate	{}	{}	c	{'tRNAChargingReaction', 'MetabolicReaction'}
5mta_c	C11H15N5O3S	0	Metabolite	5-Methylthioadenosine	{}	{}	c	{'tRNAChargingReaction', 'MetabolicReaction'}
5mthf_c	C20H24N7O6	-1	Metabolite	5-Methyltetrahydrofolate	{}	{}	c	{'MetabolicReaction'}
5mtr_c	C6H12O4S	0	Metabolite	5-Methylthio-D-ribose	{}	{}	c	{'MetabolicReaction'}
5prdmbz_c	C14H17N2O7P	-2	Metabolite	N1-(5-Phospho-alpha-D-ribosyl)-5,6-dimethylbenzimidazole	{}	{}	c	{'MetabolicReaction'}
6hmhpt_c	C7H9N5O2	0	Metabolite	6-hydroxymethyl dihydropterin	{}	{}	c	{'MetabolicReaction'}
6hmhptpp_c	C7H8N5O8P2	-3	Metabolite	6-hydroxymethyl-dihydropterin pyrophosphate	{}	{}	c	{'MetabolicReaction'}
6pgc_c	C6H10O10P	-3	Metabolite	6-Phospho-D-gluconate	{}	{}	c	{'MetabolicReaction'}
6pgl_c	C6H9O9P	-2	Metabolite	6-phospho-D-glucono-1,5-lactone	{}	{}	c	{'MetabolicReaction'}
8aonn_c	C9H17NO3	0	Metabolite	8-Amino-7-oxononanoate	{}	{}	c	{'MetabolicReaction'}
LalaDglu_c	C8H13N2O5	-1	Metabolite	L-alanine-D-glutamate	{}	{}	c	{'MetabolicReaction'}
LalaDgluMdap_c	C15H25N4O8	-1	Metabolite	L-alanine-D-glutamate-meso-2,6-diaminoheptanedioate	{}	{}	c	{'MetabolicReaction'}
LalaDgluMdapDala_c	C18H30N5O9	-1	Metabolite	L-alanine-D-glutamate-meso-2,6-diaminoheptanedioate-D-alanine	{}	{}	c	{'MetabolicReaction'}
LalaLglu_c	C8H13N2O5	-1	Metabolite	L-alanine-L-glutamate	{}	{}	c	{'MetabolicReaction'}
N1aspmd_c	C9H23N3O	2	Metabolite	N1-Acetylspermidine	{}	{}	c	{'MetabolicReaction'}
Nmtrp_c	C12H14N2O2	0	Metabolite	N-Methyltryptophan	{}	{}	c	{'MetabolicReaction'}
Sfglutth_c	C11H16N3O7S	-1	Metabolite	S-Formylglutathione	{}	{}	c	{'MetabolicReaction'}
aacald_c	C2H6NO	1	Metabolite	Aminoacetaldehyde	{}	{}	c	{'MetabolicReaction', 'MEReaction'}
aacoa_c	C25H36N7O18P3S	-4	Metabolite	Acetoacetyl-CoA	{}	{}	c	{'MetabolicReaction'}
aact_c	C3H8NO	1	Metabolite	Aminoacetone	{}	{}	c	{'MetabolicReaction'}
ac_c	C2H3O2	-1	Metabolite	Acetate	{}	{}	c	{'MetabolicReaction'}
acac_c	C4H5O3	-1	Metabolite	Acetoacetate	{}	{}	c	{'MetabolicReaction'}
acald_c	C2H4O	0	Metabolite	Acetaldehyde	{}	{}	c	{'MetabolicReaction'}
acanth_c	C9H8NO3	-1	Metabolite	N-Acetylanthranilate	{}	{}	c	{'MetabolicReaction'}
accoa_c	C23H34N7O17P3S	-4	Metabolite	Acetyl-CoA	{}	{}	c	{'tRNAChargingReaction', 'ComplexFormation', 'MetabolicReaction'}
acetol_c	C3H6O2	0	Metabolite	Acetol	{}	{}	c	{'MetabolicReaction'}
acg5p_c	C7H9NO8P	-3	Metabolite	N-Acetyl-L-glutamyl 5-phosphate	{}	{}	c	{'MetabolicReaction'}
acg5sa_c	C7H10NO4	-1	Metabolite	N-Acetyl-L-glutamate 5-semialdehyde	{}	{}	c	{'MetabolicReaction'}
acgam_c	C8H15NO6	0	Metabolite	N-Acetyl-D-glucosamine	{}	{}	c	{'MetabolicReaction'}
acgam1p_c	C8H14NO9P	-2	Metabolite	N-Acetyl-D-glucosamine 1-phosphate	{}	{}	c	{'MetabolicReaction'}
acgam6p_c	C8H14NO9P	-2	Metabolite	N-Acetyl-D-glucosamine 6-phosphate	{}	{}	c	{'MetabolicReaction'}
acglc__D_c	C8H14O7	0	Metabolite	6-Acetyl-D-glucose	{}	{}	c	{'MetabolicReaction'}
acglu_c	C7H9NO5	-2	Metabolite	N-Acetyl-L-glutamate	{}	{}	c	{'MetabolicReaction'}
acmalt_c	C14H24O12	0	Metabolite	Acetyl-maltose	{}	{}	c	{'MetabolicReaction'}
acmana_c	C8H15NO6	0	Metabolite	N-Acetyl-D-mannosamine	{}	{}	c	{'MetabolicReaction'}
acmanap_c	C8H14NO9P	-2	Metabolite	N-Acetyl-D-mannosamine 6-phosphate	{}	{}	c	{'MetabolicReaction'}
acmum6p_c	C11H17NO11P	-3	Metabolite	N-acetylmuramate 6-phosphate	{}	{}	c	{'MetabolicReaction'}
acnam_c	C11H18NO9	-1	Metabolite	N-Acetylneuraminate	{}	{}	c	{'MetabolicReaction'}
acon__C_c	C6H3O6	-3	Metabolite	cis-Aconitate	{}	{}	c	{'MetabolicReaction'}
acon__T_c	C6H3O6	-3	Metabolite	trans-Aconitate	{}	{}	c	{'MetabolicReaction'}
aconm_c	C7H6O6	-2	Metabolite	E-3-carboxy-2-pentenedioate 6-methyl ester	{}	{}	c	{'MetabolicReaction'}
acorn_c	C7H14N2O3	0	Metabolite	N2-Acetyl-L-ornithine	{}	{}	c	{'MetabolicReaction'}
acser_c	C5H9NO4	0	Metabolite	O-Acetyl-L-serine	{}	{}	c	{'MetabolicReaction'}
actp_c	C2H3O5P	-2	Metabolite	Acetyl phosphate	{}	{}	c	{'MetabolicReaction'}
ade_c	C5H5N5	0	Metabolite	Adenine	{}	{}	c	{'tRNAChargingReaction', 'MetabolicReaction'}
adn_c	C10H13N5O4	0	Metabolite	Adenosine	{}	{}	c	{'MetabolicReaction'}
adocbi_c	C58H84CoN16O11	1	Metabolite	Adenosyl cobinamide	{}	{}	c	{'MetabolicReaction'}
adocbip_c	C58H83CoN16O14P	-1	Metabolite	Adenosyl cobinamide phosphate	{}	{}	c	{'MetabolicReaction'}
adocbl_c	C72H100CoN18O17P	0	Metabolite	Adenosylcobalamin	{}	{}	c	{'ComplexFormation', 'MetabolicReaction'}
adp_c	C10H12N5O10P2	-3	Metabolite	ADP	{}	{}	c	{'TranscriptionReaction', 'tRNAChargingReaction', 'TranslationReaction', 'PostTranslationReaction', 'ComplexFormation', 'MetabolicReaction', 'SummaryVariable'}
adpglc_c	C16H23N5O15P2	-2	Metabolite	ADPglucose	{}	{}	c	{'MetabolicReaction'}
adphep__DD_c	C17H25N5O16P2	-2	Metabolite	ADP-D-glycero-D-manno-heptose	{}	{}	c	{'MetabolicReaction'}
adphep__LD_c	C17H25N5O16P2	-2	Metabolite	ADP-L-glycero-D-manno-heptose	{}	{}	c	{'MetabolicReaction'}
adprib_c	C15H21N5O14P2	-2	Metabolite	ADPribose	{}	{}	c	{'MetabolicReaction'}
ag_c	Ag	1	Metabolite	silver	{}	{}	c	{'MetabolicReaction'}
agdpcbi_c	C68H95CoN21O21P2	-1	Metabolite	Adenosine-GDP-cobinamide	{}	{}	c	{'MetabolicReaction'}
agm_c	C5H16N4	2	Metabolite	Agmatine	{}	{}	c	{'MetabolicReaction'}
ahcys_c	C14H20N6O5S	0	Metabolite	S-Adenosyl-L-homocysteine	{}	{}	c	{'tRNAChargingReaction', 'ComplexFormation', 'MetabolicReaction'}
ahdt_c	C9H12N5O13P3	-4	Metabolite	2-Amino-4-hydroxy-6-(erythro-1,2,3-trihydroxypropyl)dihydropteridine triphosphate	{}	{}	c	{'MetabolicReaction'}
aicar_c	C9H13N4O8P	-2	Metabolite	5-Amino-1-(5-Phospho-D-ribosyl)imidazole-4-carboxamide	{}	{}	c	{'MetabolicReaction'}
air_c	C8H12N3O7P	-2	Metabolite	5-amino-1-(5-phospho-D-ribosyl)imidazole	{}	{}	c	{'MetabolicReaction'}
akg_c	C5H4O5	-2	Metabolite	2-Oxoglutarate	{}	{}	c	{'MetabolicReaction'}
ala__B_c	C3H7NO2	0	Metabolite	beta-Alanine	{}	{}	c	{'MetabolicReaction'}
ala__D_c	C3H7NO2	0	Metabolite	D-Alanine	{}	{}	c	{'MetabolicReaction'}
ala__L_c	C3H7NO2	0	Metabolite	L-Alanine	{}	{}	c	{'tRNAChargingReaction', 'MetabolicReaction', 'TranslationReaction'}
alaala_c	C6H12N2O3	0	Metabolite	D-Alanyl-D-alanine	{}	{}	c	{'MetabolicReaction'}
alac__S_c	C5H7O4	-1	Metabolite	(S)-2-Acetolactate	{}	{}	c	{'MetabolicReaction'}
all__D_c	C6H12O6	0	Metabolite	D-Allose	{}	{}	c	{'MetabolicReaction'}
all6p_c	C6H11O9P	-2	Metabolite	D-Allose 6-phosphate	{}	{}	c	{'MetabolicReaction'}
alltn_c	C4H6N4O3	0	Metabolite	Allantoin	{}	{}	c	{'MetabolicReaction'}
alltt_c	C4H7N4O4	-1	Metabolite	Allantoate	{}	{}	c	{'MetabolicReaction'}
allul6p_c	C6H11O9P	-2	Metabolite	Allulose 6-phosphate	{}	{}	c	{'MetabolicReaction'}
altrn_c	C6H11O7	-1	Metabolite	D-Altronate	{}	{}	c	{'MetabolicReaction'}
amet_c	C15H23N6O5S	1	Metabolite	S-Adenosyl-L-methionine	{}	{}	c	{'tRNAChargingReaction', 'ComplexFormation', 'MetabolicReaction'}
ametam_c	C14H24N6O3S	2	Metabolite	S-Adenosylmethioninamine	{}	{}	c	{'MetabolicReaction'}
amob_c	C15H19N5O6S	0	Metabolite	S-Adenosyl-4-methylthio-2-oxobutanoate	{}	{}	c	{'MetabolicReaction', 'MEReaction'}
amp_c	C10H12N5O7P	-2	Metabolite	AMP	{}	{}	c	{'tRNAChargingReaction', 'TranscriptionReaction', 'TranslationReaction', 'ComplexFormation', 'MetabolicReaction'}
anhgm_c	C19H29N2O12	-1	Metabolite	N-Acetyl-D-glucosamine(anhydrous)N-Acetylmuramic acid	{}	{}	c	{'MetabolicReaction'}
anhgm3p_c	C34H52N6O19	-2	Metabolite	N-Acetyl-D-glucosamine(anhydrous)N-Acetylmuramyl-tripeptide	{}	{}	c	{'MetabolicReaction'}
anhgm4p_c	C37H57N7O20	-2	Metabolite	N-Acetyl-D-glucosamine(anhydrous)N-Acetylmuramyl-tetrapeptide	{}	{}	c	{'MetabolicReaction'}
anhm_c	C11H16NO7	-1	Metabolite	1,6-anhydrous-N-Acetylmuramate	{}	{}	c	{'MetabolicReaction'}
anhm3p_c	C26H39N5O14	-2	Metabolite	1,6-anhydrous-N-Acetylmuramyl-tripeptide	{}	{}	c	{'MetabolicReaction'}
anhm4p_c	C29H44N6O15	-2	Metabolite	1,6-anhydrous-N-Acetylmuramyl-tetrapeptide	{}	{}	c	{'MetabolicReaction'}
anth_c	C7H6NO2	-1	Metabolite	Anthranilate	{}	{}	c	{'MetabolicReaction'}
ap4a_c	C20H24N10O19P4	-4	Metabolite	P1,P4-Bis(5'-adenosyl) tetraphosphate	{}	{}	c	{'MetabolicReaction'}
ap5a_c	C20H24N10O22P5	-5	Metabolite	P1,P5-Bis(5'-adenosyl) pentaphosphate	{}	{}	c	{'MetabolicReaction'}
apg120_c	C42H80O11P	-1	Metabolite	acyl phosphatidylglycerol (n-C12:0)	{}	{}	c	{'MetabolicReaction'}
apg140_c	C48H92O11P	-1	Metabolite	acyl phosphatidylglycerol (n-C14:0)	{}	{}	c	{'MetabolicReaction'}
apg141_c	C48H86O11P	-1	Metabolite	acyl phosphatidylglycerol (n-C14:1)	{}	{}	c	{'MetabolicReaction'}
apg160_c	C54H104O11P	-1	Metabolite	acyl phosphatidylglycerol (n-C16:0)	{}	{}	c	{'MetabolicReaction'}
apg161_c	C54H98O11P	-1	Metabolite	acyl phosphatidylglycerol (n-C16:1)	{}	{}	c	{'MetabolicReaction'}
apg180_c	C60H116O11P	-1	Metabolite	acyl phosphatidylglycerol (n-C18:0)	{}	{}	c	{'MetabolicReaction'}
apg181_c	C60H110O11P	-1	Metabolite	acyl phosphatidylglycerol (n-C18:1)	{}	{}	c	{'MetabolicReaction'}
appl_c	C3H10NO	1	Metabolite	1-Aminopropan-2-ol	{}	{}	c	{'MetabolicReaction'}
aps_c	C10H12N5O10PS	-2	Metabolite	Adenosine 5'-phosphosulfate	{}	{}	c	{'MetabolicReaction'}
ara5p_c	C5H9O8P	-2	Metabolite	D-Arabinose 5-phosphate	{}	{}	c	{'MetabolicReaction'}
arab__L_c	C5H10O5	0	Metabolite	L-Arabinose	{}	{}	c	{'MetabolicReaction'}
aragund_c	C71H115N1O17P2	-2	Metabolite	O-acetyl-rhamanosyl-N-acetylglucosamyl-undecaprenyl diphosphate	{}	{}	c	{'MetabolicReaction'}
arbt6p_c	C12H15O10P	-2	Metabolite	Arbutin 6-phosphate	{}	{}	c	{'MetabolicReaction'}
arbtn_c	C22H33N4O13	-3	Metabolite	aerobactin minus Fe3	{}	{}	c	{'MetabolicReaction'}
arbtn__fe3_c	C22H33FeN4O13	0	Metabolite	Aerobactin	{}	{}	c	{'MetabolicReaction'}
arg__L_c	C6H15N4O2	1	Metabolite	L-Arginine	{}	{}	c	{'tRNAChargingReaction', 'MetabolicReaction', 'TranslationReaction'}
argsuc_c	C10H17N4O6	-1	Metabolite	N(omega)-(L-Arginino)succinate	{}	{}	c	{'MetabolicReaction'}
ascb6p_c	C6H7O9P	-2	Metabolite	L-ascorbate-6-phosphate	{}	{}	c	{'MetabolicReaction'}
asn__L_c	C4H8N2O3	0	Metabolite	L-Asparagine	{}	{}	c	{'tRNAChargingReaction', 'MetabolicReaction', 'TranslationReaction'}
aso3_c	AsO3	-3	Metabolite	arsenite	{}	{}	c	{'MetabolicReaction'}
aso4_c	AsO4	-3	Metabolite	arsenate	{}	{}	c	{'MetabolicReaction'}
asp__L_c	C4H6NO4	-1	Metabolite	L-Aspartate	{}	{}	c	{'tRNAChargingReaction', 'MetabolicReaction', 'TranslationReaction'}
aspsa_c	C4H7NO3	0	Metabolite	L-Aspartate 4-semialdehyde	{}	{}	c	{'MetabolicReaction'}
athr__L_c	C4H9NO3	0	Metabolite	L-Allo-threonine	{}	{}	c	{'MetabolicReaction'}
athtp_c	C22H28N9O13P3S	-2	Metabolite	adenosine thiamine triphosphate	{}	{}	c	{'MetabolicReaction'}
atp_c	C10H12N5O13P3	-4	Metabolite	ATP	{}	{}	c	{'TranscriptionReaction', 'tRNAChargingReaction', 'TranslationReaction', 'PostTranslationReaction', 'ComplexFormation', 'MetabolicReaction', 'SummaryVariable'}
b2coa_c	C25H36N7O17P3S	-4	Metabolite	Crotonoyl-CoA	{}	{}	c	{'MetabolicReaction'}
bbtcoa_c	C28H46N8O17P3S	-3	Metabolite	gamma-butyrobetainyl-CoA	{}	{}	c	{'MetabolicReaction'}
betald_c	C5H12NO	1	Metabolite	Betaine aldehyde	{}	{}	c	{'MetabolicReaction'}
bglycogen_c	C6H10O5	0	Metabolite	branching glycogen	{}	{}	c	{'MetabolicReaction'}
bmoco_c	C20H20N10O13P2S4Mo	-4	Metabolite	bis-molybdenum cofactor	{}	{}	c	{'MetabolicReaction'}
bmoco1gdp_c	C30H32N15O20P3S4Mo	-4	Metabolite	bis-molybdopterin mono-guanine dinucleotide	{}	{}	c	{'MetabolicReaction'}
bmocogdp_c	C40H44N20O27P4S4Mo	-4	Metabolite	bis-molybdopterin guanine dinucleotide	{}	{}	c	{'ComplexFormation', 'MetabolicReaction'}
btal_c	C4H8O	0	Metabolite	Butanal	{}	{}	c	{'MetabolicReaction'}
btcoa_c	C25H38N7O17P3S	-4	Metabolite	Butanoyl-CoA	{}	{}	c	{'MetabolicReaction'}
btn_c	C10H15N2O3S	-1	Metabolite	Biotin	{}	{}	c	{'ComplexFormation', 'MetabolicReaction'}
btnso_c	C10H15N2O4S	-1	Metabolite	d-biotin d-sulfoxide	{}	{}	c	{'MetabolicReaction'}
but_c	C4H7O2	-1	Metabolite	Butyrate (n-C4:0)	{}	{}	c	{'MetabolicReaction'}
butso3_c	C4H9O3S	-1	Metabolite	butanesulfonate	{}	{}	c	{'MetabolicReaction'}
ca2_c	Ca	2	Metabolite	Calcium	{}	{}	c	{'ComplexFormation', 'MetabolicReaction'}
camp_c	C10H11N5O6P	-1	Metabolite	cAMP	{}	{}	c	{'MetabolicReaction'}
cbasp_c	C5H6N2O5	-2	Metabolite	N-Carbamoyl-L-aspartate	{}	{}	c	{'MetabolicReaction'}
cbi_c	C48H72CoN11O8	0	Metabolite	Cobinamide	{}	{}	c	{'MetabolicReaction'}
cbl1_c	C62H88CoN13O14P	-1	Metabolite	Cob(I)alamin	{}	{}	c	{'ComplexFormation', 'MetabolicReaction'}
cbm_c	CH2NO2	-1	Metabolite	Carbamate	{}	{}	c	{'MetabolicReaction'}
cbp_c	CH2NO5P	-2	Metabolite	Carbamoyl phosphate	{}	{}	c	{'ComplexFormation', 'MetabolicReaction'}
cd2_c	Cd	2	Metabolite	Cadmium	{}	{}	c	{'ComplexFormation', 'MetabolicReaction'}
cdg_c	C7H5N4O3	-1	Metabolite	7-deaza-7-carboxyguanine	{}	{}	c	{'MetabolicReaction'}
cdp_c	C9H12N3O11P2	-3	Metabolite	CDP	{}	{}	c	{'MetabolicReaction'}
cdpdddecg_c	C36H63N3O15P2	-2	Metabolite	CDP-1,2-didodecanoylglycerol	{}	{}	c	{'MetabolicReaction'}
cdpdhdec9eg_c	C44H75N3O15P2	-2	Metabolite	CDP-1,2-dihexadec-9-enoylglycerol	{}	{}	c	{'MetabolicReaction'}
cdpdhdecg_c	C44H79N3O15P2	-2	Metabolite	CDP-1,2-dihexadecanoylglycerol	{}	{}	c	{'MetabolicReaction'}
cdpdodec11eg_c	C48H83N3O15P2	-2	Metabolite	CDP-1,2-dioctadec-11-enoylglycerol	{}	{}	c	{'MetabolicReaction'}
cdpdodecg_c	C48H87N3O15P2	-2	Metabolite	CDP-1,2-dioctadecanoylglycerol	{}	{}	c	{'MetabolicReaction'}
cdpdtdec7eg_c	C40H67N3O15P2	-2	Metabolite	CDP-1,2-ditetradec-7-enoylglycerol	{}	{}	c	{'MetabolicReaction'}
cdpdtdecg_c	C40H71N3O15P2	-2	Metabolite	CDP-1,2-ditetradecanoylglycerol	{}	{}	c	{'MetabolicReaction'}
cechddd_c	C9H11O4	-1	Metabolite	cis-3-(3-carboxyethyl)-3,5-cyclohexadiene-1,2-diol	{}	{}	c	{'MetabolicReaction'}
cenchddd_c	C9H9O4	-1	Metabolite	cis-3-(3-carboxyethenyl)-3,5-cyclohexadiene-1,2-diol	{}	{}	c	{'MetabolicReaction'}
cgly_c	C5H10N2O3S	0	Metabolite	Cys-Gly	{}	{}	c	{'MetabolicReaction'}
chol_c	C5H14NO	1	Metabolite	Choline	{}	{}	c	{'MetabolicReaction'}
chor_c	C10H8O6	-2	Metabolite	chorismate	{}	{}	c	{'MetabolicReaction'}
chtbs6p_c	C16H27N2O14P	-2	Metabolite	diacetylchitobiose-6-phosphate	{}	{}	c	{'MetabolicReaction'}
cinnm_c	C9H7O2	-1	Metabolite	trans-Cinnamate	{}	{}	c	{'MetabolicReaction'}
cit_c	C6H5O7	-3	Metabolite	Citrate	{}	{}	c	{'MetabolicReaction'}
citr__L_c	C6H13N3O3	0	Metabolite	L-Citrulline	{}	{}	c	{'MetabolicReaction'}
ckdo_c	C17H24N3O15P	-2	Metabolite	CMP-3-deoxy-D-manno-octulosonate	{}	{}	c	{'MetabolicReaction'}
cl_c	Cl	-1	Metabolite	Chloride	{}	{}	c	{'ComplexFormation', 'MetabolicReaction'}
cmp_c	C9H12N3O8P	-2	Metabolite	CMP	{}	{}	c	{'TranscriptionReaction', 'MetabolicReaction', 'TranslationReaction'}
co2_c	CO2	0	Metabolite	CO2	{}	{}	c	{'ComplexFormation', 'MetabolicReaction'}
coa_c	C21H32N7O16P3S	-4	Metabolite	Coenzyme A	{}	{}	c	{'tRNAChargingReaction', 'ComplexFormation', 'MetabolicReaction', 'SummaryVariable'}
cobalt2_c	Co	2	Metabolite	Co2+	{}	{}	c	{'ComplexFormation', 'MetabolicReaction'}
colipa_c	C176H303N2O100P4	-11	Metabolite	core oligosaccharide lipid A	{}	{}	c	{'MetabolicReaction'}
cpe160_c	C39H74N1O8P1	0	Metabolite	cyclopropane phosphatidylethanolamine (dihexadec-9,10-cyclo-anoyl, n-C16:0 cyclo)	{}	{}	c	{'MetabolicReaction'}
cpe180_c	C43H82N1O8P1	0	Metabolite	cyclopropane phosphatidylethanolamine (dioctadec-11,12-cyclo-anoyl, n-C18:0 cyclo)	{}	{}	c	{'MetabolicReaction'}
cpg160_c	C40H74O10P1	-1	Metabolite	cyclopropane phosphatidylglycerol (dihexadec-9,10-cyclo-anoyl, n-C16:0 cyclo)	{}	{}	c	{'MetabolicReaction'}
cpg180_c	C44H82O10P1	-1	Metabolite	cyclopropane phosphatidylglycerol (dioctadec-11,12-cyclo-anoyl, n-C18:0 cyclo)	{}	{}	c	{'MetabolicReaction'}
cpgn_c	C35H52N6O13Fe	-1	Metabolite	coprogen	{}	{}	c	{'MetabolicReaction'}
cpgn__un_c	C35H52N6O13	-4	Metabolite	coprogen unloaded (no Fe(III))	{}	{}	c	{'MetabolicReaction'}
cph4_c	C7H8N5O3	-1	Metabolite	6-carboxy-5,6,7,8-tetrahydropterin	{}	{}	c	{'MetabolicReaction'}
cpmp_c	C10H13N5O8P	-1	Metabolite	cyclic pyranopterin monophosphate	{}	{}	c	{'MetabolicReaction'}
cpppg3_c	C36H40N4O8	-4	Metabolite	Coproporphyrinogen III	{}	{}	c	{'MetabolicReaction'}
crn_c	C7H15NO3	0	Metabolite	L-Carnitine	{}	{}	c	{'MetabolicReaction'}
crn__D_c	C7H15NO3	0	Metabolite	D-Carnitine	{}	{}	c	{'MetabolicReaction'}
crnDcoa_c	C28H46N8O18P3S	-3	Metabolite	D-carnitinyl-CoA	{}	{}	c	{'MetabolicReaction'}
crncoa_c	C28H46N8O18P3S	-3	Metabolite	L-Carnitinyl-CoA	{}	{}	c	{'MetabolicReaction'}
csn_c	C4H5N3O	0	Metabolite	Cytosine	{}	{}	c	{'MetabolicReaction'}
ctbt_c	C7H13NO2	0	Metabolite	crotonobetaine	{}	{}	c	{'MetabolicReaction'}
ctbtcoa_c	C28H44N8O17P3S	-3	Metabolite	crotonobetainyl-CoA	{}	{}	c	{'MetabolicReaction'}
ctp_c	C9H12N3O14P3	-4	Metabolite	CTP	{}	{}	c	{'TranscriptionReaction', 'MetabolicReaction'}
cu_c	Cu	1	Metabolite	Cu+	{}	{}	c	{'ComplexFormation', 'MetabolicReaction'}
cu2_c	Cu	2	Metabolite	Cu2+	{}	{}	c	{'ComplexFormation', 'MetabolicReaction'}
cyan_c	CHN	0	Metabolite	Hydrogen cyanide	{}	{}	c	{'MetabolicReaction'}
cynt_c	CNO	-1	Metabolite	Cyanate	{}	{}	c	{'MetabolicReaction'}
cys__D_c	C3H7NO2S	0	Metabolite	D-Cysteine	{}	{}	c	{'MetabolicReaction'}
cys__L_c	C3H7NO2S	0	Metabolite	L-Cysteine	{}	{}	c	{'tRNAChargingReaction', 'MetabolicReaction', 'TranslationReaction'}
cyst__L_c	C7H14N2O4S	0	Metabolite	L-Cystathionine	{}	{}	c	{'MetabolicReaction'}
cytd_c	C9H13N3O5	0	Metabolite	Cytidine	{}	{}	c	{'MetabolicReaction'}
dad__2_c	C10H13N5O3	0	Metabolite	Deoxyadenosine	{}	{}	c	{'ComplexFormation', 'MetabolicReaction'}
dad__5_c	C10H13N5O3	0	Metabolite	5'-Deoxyadenosine	{}	{}	c	{'tRNAChargingReaction', 'MetabolicReaction'}
dadp_c	C10H12N5O9P2	-3	Metabolite	dADP	{}	{}	c	{'MetabolicReaction'}
damp_c	C10H12N5O6P	-2	Metabolite	dAMP	{}	{}	c	{'MetabolicReaction'}
dann_c	C9H21N2O2	1	Metabolite	7,8-Diaminononanoate	{}	{}	c	{'MetabolicReaction'}
datp_c	C10H12N5O12P3	-4	Metabolite	dATP	{}	{}	c	{'MetabolicReaction', 'SummaryVariable'}
db4p_c	C4H7O6P	-2	Metabolite	3,4-dihydroxy-2-butanone 4-phosphate	{}	{}	c	{'MetabolicReaction'}
dc2coa_c	C31H48N7O17P3S	-4	Metabolite	trans-Dec-2-enoyl-CoA	{}	{}	c	{'MetabolicReaction'}
dca_c	C10H19O2	-1	Metabolite	Decanoate (n-C10:0)	{}	{}	c	{'MetabolicReaction'}
dcacoa_c	C31H50N7O17P3S	-4	Metabolite	Decanoyl-CoA (n-C10:0CoA)	{}	{}	c	{'MetabolicReaction'}
dcamp_c	C14H14N5O11P	-4	Metabolite	N6-(1,2-Dicarboxyethyl)-AMP	{}	{}	c	{'MetabolicReaction'}
dcdp_c	C9H12N3O10P2	-3	Metabolite	dCDP	{}	{}	c	{'MetabolicReaction'}
dcmp_c	C9H12N3O7P	-2	Metabolite	dCMP	{}	{}	c	{'MetabolicReaction'}
dctp_c	C9H12N3O13P3	-4	Metabolite	dCTP	{}	{}	c	{'MetabolicReaction', 'SummaryVariable'}
dcyt_c	C9H13N3O4	0	Metabolite	Deoxycytidine	{}	{}	c	{'MetabolicReaction'}
dd2coa_c	C33H52N7O17P3S	-4	Metabolite	trans-Dodec-2-enoyl-CoA	{}	{}	c	{'MetabolicReaction'}
ddca_c	C12H23O2	-1	Metabolite	Dodecanoate (n-C12:0)	{}	{}	c	{'MetabolicReaction'}
ddcacoa_c	C33H54N7O17P3S	-4	Metabolite	Dodecanoyl-CoA (n-C12:0CoA)	{}	{}	c	{'MetabolicReaction'}
ddcap_c	C12H24O5P1	-1	Metabolite	Dodecanoly-phosphate (n-C12:0)	{}	{}	c	{'MetabolicReaction'}
dgdp_c	C10H12N5O10P2	-3	Metabolite	dGDP	{}	{}	c	{'MetabolicReaction'}
dgmp_c	C10H12N5O7P	-2	Metabolite	dGMP	{}	{}	c	{'MetabolicReaction'}
dgslnt_c	C20H30N6O12S2Se	-2	Metabolite	Selenodiglutathione	{}	{}	c	{'MetabolicReaction'}
dgsn_c	C10H13N5O4	0	Metabolite	Deoxyguanosine	{}	{}	c	{'MetabolicReaction'}
dgtp_c	C10H12N5O13P3	-4	Metabolite	dGTP	{}	{}	c	{'MetabolicReaction', 'SummaryVariable'}
dha_c	C3H6O3	0	Metabolite	Dihydroxyacetone	{}	{}	c	{'MetabolicReaction'}
dhap_c	C3H5O6P	-2	Metabolite	Dihydroxyacetone phosphate	{}	{}	c	{'MetabolicReaction'}
dhcinnm_c	C9H7O4	-1	Metabolite	2,3-dihydroxicinnamic acid	{}	{}	c	{'MetabolicReaction'}
dhf_c	C19H19N7O6	-2	Metabolite	7,8-Dihydrofolate	{}	{}	c	{'MetabolicReaction'}
dhgly_c	C2H2NO2	-1	Metabolite	dehydroglycine	{}	{}	c	{'MetabolicReaction'}
dhmpt_c	C9H13N5O4	0	Metabolite	Dihydromonapterin	{}	{}	c	{'MetabolicReaction'}
dhmptp_c	C9H12N5O13P3	-4	Metabolite	dihydromonapterin-triphosphate	{}	{}	c	{'MetabolicReaction'}
dhna_c	C11H7O4	-1	Metabolite	1,4-Dihydroxy-2-naphthoate	{}	{}	c	{'MetabolicReaction'}
dhnpt_c	C9H13N5O4	0	Metabolite	Dihydroneopterin	{}	{}	c	{'MetabolicReaction'}
dhor__S_c	C5H5N2O4	-1	Metabolite	(S)-Dihydroorotate	{}	{}	c	{'MetabolicReaction'}
dhpmp_c	C9H12N5O7P	-2	Metabolite	Dihydroneopterin monophosphate	{}	{}	c	{'MetabolicReaction'}
dhpppn_c	C9H9O4	-1	Metabolite	3-(2,3-Dihydroxyphenyl)propanoate	{}	{}	c	{'MetabolicReaction'}
dhpt_c	C14H13N6O3	-1	Metabolite	Dihydropteroate	{}	{}	c	{'MetabolicReaction'}
dhptd_c	C5H8O4	0	Metabolite	4,5-dihydroxy-2,3-pentanedione	{}	{}	c	{'MetabolicReaction'}
dhptdn_c	C6H6N4	0	Metabolite	6,7-Dihydropteridine	{}	{}	c	{'MetabolicReaction'}
didp_c	C10H11N4O10P2	-3	Metabolite	dIDP	{}	{}	c	{'MetabolicReaction'}
dimp_c	C10H11N4O7P	-2	Metabolite	dIMP	{}	{}	c	{'MetabolicReaction'}
din_c	C10H12N4O4	0	Metabolite	Deoxyinosine	{}	{}	c	{'MetabolicReaction'}
ditp_c	C10H11N4O13P3	-4	Metabolite	dITP	{}	{}	c	{'MetabolicReaction'}
dmbzid_c	C9H10N2	0	Metabolite	5,6-Dimethylbenzimidazole	{}	{}	c	{'MetabolicReaction'}
dmlz_c	C13H18N4O6	0	Metabolite	6,7-Dimethyl-8-(1-D-ribityl)lumazine	{}	{}	c	{'MetabolicReaction'}
dmpp_c	C5H9O7P2	-3	Metabolite	Dimethylallyl diphosphate	{}	{}	c	{'tRNAChargingReaction', 'MetabolicReaction'}
dms_c	C2H6S	0	Metabolite	Dimethyl sulfide	{}	{}	c	{'MetabolicReaction'}
dmso_c	C2H6OS	0	Metabolite	Dimethyl sulfoxide	{}	{}	c	{'MetabolicReaction'}
dnad_c	C21H24N6O15P2	-2	Metabolite	Deamino-NAD+	{}	{}	c	{'MetabolicReaction'}
dpcoa_c	C21H33N7O13P2S	-2	Metabolite	Dephospho-CoA	{}	{}	c	{'MetabolicReaction'}
dscl_c	C42H41N4O16	-7	Metabolite	dihydrosirohydrochlorin	{}	{}	c	{'MetabolicReaction'}
dtbt_c	C10H17N2O3	-1	Metabolite	Dethiobiotin	{}	{}	c	{'MetabolicReaction'}
dtdp_c	C10H13N2O11P2	-3	Metabolite	dTDP	{}	{}	c	{'MetabolicReaction'}
dtdp4aaddg_c	C18H27N3O15P2	-2	Metabolite	dTDP-4-acetamido-4,6-dideoxy-D-galactose	{}	{}	c	{'MetabolicReaction'}
dtdp4addg_c	C16H26N3O14P2	-1	Metabolite	dTDP-4-amino-4,6-dideoxy-D-galactose	{}	{}	c	{'MetabolicReaction'}
dtdp4d6dg_c	C16H22N2O15P2	-2	Metabolite	dTDP-4-dehydro-6-deoxy-D-glucose	{}	{}	c	{'MetabolicReaction'}
dtdp4d6dm_c	C16H22N2O15P2	-2	Metabolite	dTDP-4-dehydro-6-deoxy-L-mannose	{}	{}	c	{'MetabolicReaction'}
dtdpglu_c	C16H24N2O16P2	-2	Metabolite	dTDPglucose	{}	{}	c	{'MetabolicReaction'}
dtdprmn_c	C16H24N2O15P2	-2	Metabolite	dTDP-L-rhamnose	{}	{}	c	{'MetabolicReaction'}
dtmp_c	C10H13N2O8P	-2	Metabolite	dTMP	{}	{}	c	{'MetabolicReaction'}
dttp_c	C10H13N2O14P3	-4	Metabolite	dTTP	{}	{}	c	{'MetabolicReaction', 'SummaryVariable'}
dudp_c	C9H11N2O11P2	-3	Metabolite	dUDP	{}	{}	c	{'MetabolicReaction'}
dump_c	C9H11N2O8P	-2	Metabolite	dUMP	{}	{}	c	{'MetabolicReaction'}
duri_c	C9H12N2O5	0	Metabolite	Deoxyuridine	{}	{}	c	{'MetabolicReaction'}
dutp_c	C9H11N2O14P3	-4	Metabolite	dUTP	{}	{}	c	{'MetabolicReaction'}
dxyl_c	C5H10O4	0	Metabolite	1-deoxy-D-xylulose	{}	{}	c	{'MetabolicReaction'}
dxyl5p_c	C5H9O7P	-2	Metabolite	1-deoxy-D-xylulose 5-phosphate	{}	{}	c	{'MetabolicReaction'}
e4p_c	C4H7O7P	-2	Metabolite	D-Erythrose 4-phosphate	{}	{}	c	{'MetabolicReaction'}
eig3p_c	C6H9N2O6P	-2	Metabolite	D-erythro-1-(Imidazol-4-yl)glycerol 3-phosphate	{}	{}	c	{'MetabolicReaction'}
enter_c	C30H27N3O15	0	Metabolite	Enterochelin	{}	{}	c	{'MetabolicReaction'}
etha_c	C2H8NO	1	Metabolite	Ethanolamine	{}	{}	c	{'MetabolicReaction'}
ethso3_c	C2H5O3S	-1	Metabolite	ethanesulfonate	{}	{}	c	{'MetabolicReaction'}
etoh_c	C2H6O	0	Metabolite	Ethanol	{}	{}	c	{'MetabolicReaction'}
f1p_c	C6H11O9P	-2	Metabolite	D-Fructose 1-phosphate	{}	{}	c	{'MetabolicReaction'}
f6p_c	C6H11O9P	-2	Metabolite	D-Fructose 6-phosphate	{}	{}	c	{'MetabolicReaction'}
fad_c	C27H31N9O15P2	-2	Metabolite	Flavin adenine dinucleotide oxidized	{}	{}	c	{'ComplexFormation', 'MetabolicReaction'}
fadh2_c	C27H33N9O15P2	-2	Metabolite	Flavin adenine dinucleotide reduced	{}	{}	c	{'ComplexFormation', 'MetabolicReaction'}
fald_c	CH2O	0	Metabolite	Formaldehyde	{}	{}	c	{'MetabolicReaction'}
fc1p_c	C6H11O8P	-2	Metabolite	L-Fuculose 1-phosphate	{}	{}	c	{'MetabolicReaction'}
fcl__L_c	C6H12O5	0	Metabolite	L-fuculose	{}	{}	c	{'MetabolicReaction'}
fdp_c	C6H10O12P2	-4	Metabolite	D-Fructose 1,6-bisphosphate	{}	{}	c	{'MetabolicReaction'}
fe2_c	Fe	2	Metabolite	Fe2+	{}	{}	c	{'ComplexFormation', 'MetabolicReaction'}
fe3_c	Fe	3	Metabolite	Fe3+	{}	{}	c	{'ComplexFormation', 'MetabolicReaction'}
fe3dhbzs_c	C10H10NO6Fe	2	Metabolite	ferric 2,3-dihydroxybenzoylserine	{}	{}	c	{'MetabolicReaction'}
fe3hox_c	C9H18O6N3Fe	0	Metabolite	Fe(III)hydroxamate	{}	{}	c	{'MetabolicReaction'}
fe3hox__un_c	C9H18O6N3	-3	Metabolite	Fe(III)hydoxamate, unloaded	{}	{}	c	{'MetabolicReaction'}
fecrm_c	C27H42FeN9O12	0	Metabolite	Ferrichrome	{}	{}	c	{'MetabolicReaction'}
fecrm__un_c	C27H42N9O12	-3	Metabolite	Ferrichrome minus Fe(III)	{}	{}	c	{'MetabolicReaction'}
feenter_c	C30H27FeN3O15	3	Metabolite	Fe-enterobactin	{}	{}	c	{'MetabolicReaction'}
feoxam_c	C25H46FeN6O8	1	Metabolite	ferroxamine	{}	{}	c	{'MetabolicReaction'}
feoxam__un_c	C25H46N6O8	-2	Metabolite	ferroxamine minus Fe(3)	{}	{}	c	{'MetabolicReaction'}
fgam_c	C8H13N2O9P	-2	Metabolite	N2-Formyl-N1-(5-phospho-D-ribosyl)glycinamide	{}	{}	c	{'MetabolicReaction'}
fmn_c	C17H19N4O9P	-2	Metabolite	FMN	{}	{}	c	{'ComplexFormation', 'MetabolicReaction'}
fmnh2_c	C17H21N4O9P	-2	Metabolite	Reduced FMN	{}	{}	c	{'ComplexFormation', 'MetabolicReaction'}
for_c	CH1O2	-1	Metabolite	Formate	{}	{}	c	{'MetabolicReaction', 'TranslationReaction'}
forcoa_c	C22H32N7O17P3S	-4	Metabolite	Formyl-CoA	{}	{}	c	{'MetabolicReaction'}
fpram_c	C8H15N3O8P	-1	Metabolite	2-(Formamido)-N1-(5-phospho-D-ribosyl)acetamidine	{}	{}	c	{'MetabolicReaction'}
fprica_c	C10H13N4O9P	-2	Metabolite	5-Formamido-1-(5-phospho-D-ribosyl)imidazole-4-carboxamide	{}	{}	c	{'MetabolicReaction'}
frdp_c	C15H25O7P2	-3	Metabolite	Farnesyl diphosphate	{}	{}	c	{'MetabolicReaction'}
fru_c	C6H12O6	0	Metabolite	D-Fructose	{}	{}	c	{'MetabolicReaction'}
frulys_c	C12H25N2O7	1	Metabolite	fructoselysine	{}	{}	c	{'MetabolicReaction'}
frulysp_c	C12H24N2O10P	-1	Metabolite	fructoselysine Phosphate	{}	{}	c	{'MetabolicReaction'}
fruur_c	C6H9O7	-1	Metabolite	D-Fructuronate	{}	{}	c	{'MetabolicReaction'}
fuc__L_c	C6H12O5	0	Metabolite	L-Fucose	{}	{}	c	{'MetabolicReaction'}
fum_c	C4H2O4	-2	Metabolite	Fumarate	{}	{}	c	{'MetabolicReaction'}
g1p_c	C6H11O9P	-2	Metabolite	D-Glucose 1-phosphate	{}	{}	c	{'MetabolicReaction'}
g3p_c	C3H5O6P	-2	Metabolite	Glyceraldehyde 3-phosphate	{}	{}	c	{'PostTranslationReaction', 'MetabolicReaction'}
g3pc_c	C8H20NO6P	0	Metabolite	sn-Glycero-3-phosphocholine	{}	{}	c	{'MetabolicReaction'}
g3pe_c	C5H14NO6P	0	Metabolite	sn-Glycero-3-phosphoethanolamine	{}	{}	c	{'MetabolicReaction'}
g3pg_c	C6H14O8P	-1	Metabolite	Glycerophosphoglycerol	{}	{}	c	{'MetabolicReaction'}
g3pi_c	C9H18O11P	-1	Metabolite	sn-Glycero-3-phospho-1-inositol	{}	{}	c	{'MetabolicReaction'}
g3ps_c	C6H13NO8P	-1	Metabolite	Glycerophosphoserine	{}	{}	c	{'MetabolicReaction'}
g6p_c	C6H11O9P	-2	Metabolite	D-Glucose 6-phosphate	{}	{}	c	{'MetabolicReaction'}
gagicolipa_c	C157H271N2O84P4	-11	Metabolite	galactosyl-glucosyl-inner core oligosaccharide lipid A	{}	{}	c	{'MetabolicReaction'}
gal_c	C6H12O6	0	Metabolite	D-Galactose	{}	{}	c	{'MetabolicReaction'}
gal1p_c	C6H11O9P	-2	Metabolite	alpha-D-Galactose 1-phosphate	{}	{}	c	{'MetabolicReaction'}
galct__D_c	C6H8O8	-2	Metabolite	D-Galactarate	{}	{}	c	{'MetabolicReaction'}
galctn__D_c	C6H11O7	-1	Metabolite	D-Galactonate	{}	{}	c	{'MetabolicReaction'}
galctn__L_c	C6H11O7	-1	Metabolite	L-Galactonate	{}	{}	c	{'MetabolicReaction'}
galt1p_c	C6H13O9P	-2	Metabolite	Galactitol 1-phosphate	{}	{}	c	{'MetabolicReaction'}
galur_c	C6H9O7	-1	Metabolite	D-Galacturonate	{}	{}	c	{'MetabolicReaction'}
gam1p_c	C6H13NO8P	-1	Metabolite	D-Glucosamine 1-phosphate	{}	{}	c	{'MetabolicReaction'}
gam6p_c	C6H13NO8P	-1	Metabolite	D-Glucosamine 6-phosphate	{}	{}	c	{'MetabolicReaction'}
gar_c	C7H14N2O8P	-1	Metabolite	N1-(5-Phospho-D-ribosyl)glycinamide	{}	{}	c	{'MetabolicReaction'}
garagund_c	C77H125N1O22P2	-2	Metabolite	glucosyl-O-acetyl-rhamanosyl-N-acetylglucosamyl-undecaprenyl diphosphate	{}	{}	c	{'MetabolicReaction'}
gbbtn_c	C7H15NO2	0	Metabolite	gamma-butyrobetaine	{}	{}	c	{'MetabolicReaction'}
gcald_c	C2H4O2	0	Metabolite	Glycolaldehyde	{}	{}	c	{'MetabolicReaction'}
gdp_c	C10H12N5O11P2	-3	Metabolite	GDP	{}	{}	c	{'tRNAChargingReaction', 'TranslationReaction', 'PostTranslationReaction', 'ComplexFormation', 'MetabolicReaction'}
gdpddman_c	C16H21N5O15P2	-2	Metabolite	GDP-4-dehydro-6-deoxy-D-mannose	{}	{}	c	{'MetabolicReaction'}
gdpfuc_c	C16H23N5O15P2	-2	Metabolite	GDP-L-fucose	{}	{}	c	{'MetabolicReaction'}
gdpmann_c	C16H23N5O16P2	-2	Metabolite	GDP-D-mannose	{}	{}	c	{'MetabolicReaction'}
gdpofuc_c	C16H21N5O15P2	-2	Metabolite	GDP-4-oxo-L-fucose	{}	{}	c	{'MetabolicReaction'}
gdptp_c	C10H11N5O20P5	-7	Metabolite	Guanosine 3'-diphosphate 5'-triphosphate	{}	{}	c	{'MetabolicReaction'}
gfgaragund_c	C83H135N1O27P2	-2	Metabolite	galactofuranosyl-glucosyl-O-acetyl-rhamanosyl-N-acetylglucosamyl-undecaprenyl diphosphate	{}	{}	c	{'MetabolicReaction'}
gg4abut_c	C9H15O5N2	-1	Metabolite	gamma-glutamyl-gamma aminobutyric acid	{}	{}	c	{'MetabolicReaction'}
ggagicolipa_c	C163H281N2O89P4	-11	Metabolite	glucosyl-galactosyl-glucosyl-inner core oligosaccharide lipid A	{}	{}	c	{'MetabolicReaction'}
ggbutal_c	C9H16O4N2	0	Metabolite	gamma-glutamyl-gamma-butyraldehyde	{}	{}	c	{'MetabolicReaction'}
gggagicolipa_c	C169H291N2O94P4	-11	Metabolite	glucosyl-glucosyl-galactosyl-glucosyl-inner core oligosaccharide lipid A	{}	{}	c	{'MetabolicReaction'}
ggptrc_c	C9H20O3N3	1	Metabolite	gamma-glutamyl-putrescine	{}	{}	c	{'MetabolicReaction'}
ghb_c	C4H7O3	-1	Metabolite	gamma-hydroxybutyrate	{}	{}	c	{'MetabolicReaction'}
gicolipa_c	C151H261N2O79P4	-11	Metabolite	glucosyl-inner core oligosaccharide lipid A	{}	{}	c	{'MetabolicReaction'}
glc__D_c	C6H12O6	0	Metabolite	D-Glucose	{}	{}	c	{'MetabolicReaction'}
glcn_c	C6H11O7	-1	Metabolite	D-Gluconate	{}	{}	c	{'MetabolicReaction'}
glcr_c	C6H8O8	-2	Metabolite	D-Glucarate	{}	{}	c	{'MetabolicReaction'}
glcur_c	C6H9O7	-1	Metabolite	D-Glucuronate	{}	{}	c	{'MetabolicReaction'}
gln__L_c	C5H10N2O3	0	Metabolite	L-Glutamine	{}	{}	c	{'tRNAChargingReaction', 'MetabolicReaction', 'TranslationReaction'}
glu__D_c	C5H8NO4	-1	Metabolite	D-Glutamate	{}	{}	c	{'MetabolicReaction'}
glu__L_c	C5H8NO4	-1	Metabolite	L-Glutamate	{}	{}	c	{'tRNAChargingReaction', 'MetabolicReaction', 'TranslationReaction'}
glu1sa_c	C5H9NO3	0	Metabolite	L-Glutamate 1-semialdehyde	{}	{}	c	{'MetabolicReaction'}
glu5p_c	C5H8NO7P	-2	Metabolite	L-Glutamate 5-phosphate	{}	{}	c	{'MetabolicReaction'}
glu5sa_c	C5H9NO3	0	Metabolite	L-Glutamate 5-semialdehyde	{}	{}	c	{'MetabolicReaction'}
glucys_c	C8H13N2O5S	-1	Metabolite	gamma-L-Glutamyl-L-cysteine	{}	{}	c	{'MetabolicReaction'}
glx_c	C2H1O3	-1	Metabolite	Glyoxylate	{}	{}	c	{'tRNAChargingReaction', 'MetabolicReaction'}
gly_c	C2H5NO2	0	Metabolite	Glycine	{}	{}	c	{'tRNAChargingReaction', 'MetabolicReaction', 'TranslationReaction'}
glyald_c	C3H6O3	0	Metabolite	D-Glyceraldehyde	{}	{}	c	{'MetabolicReaction'}
glyb_c	C5H11NO2	0	Metabolite	Glycine betaine	{}	{}	c	{'MetabolicReaction'}
glyc_c	C3H8O3	0	Metabolite	Glycerol	{}	{}	c	{'MetabolicReaction'}
glyc__R_c	C3H5O4	-1	Metabolite	(R)-Glycerate	{}	{}	c	{'MetabolicReaction'}
glyc2p_c	C3H7O6P	-2	Metabolite	Glycerol 2-phosphate	{}	{}	c	{'MetabolicReaction'}
glyc3p_c	C3H7O6P	-2	Metabolite	Glycerol 3-phosphate	{}	{}	c	{'MetabolicReaction'}
glyclt_c	C2H3O3	-1	Metabolite	Glycolate	{}	{}	c	{'MetabolicReaction'}
glycogen_c	C6H10O5	0	Metabolite	glycogen	{}	{}	c	{'MetabolicReaction', 'SummaryVariable'}
gmhep17bp_c	C7H12O13P2	-4	Metabolite	D-Glycero-D-manno-heptose 1,7-bisphosphate	{}	{}	c	{'MetabolicReaction'}
gmhep1p_c	C7H13O10P	-2	Metabolite	D-Glycero-D-manno-heptose 1-phosphate	{}	{}	c	{'MetabolicReaction'}
gmhep7p_c	C7H13O10P	-2	Metabolite	D-Glycero-D-manno-heptose 7-phosphate	{}	{}	c	{'MetabolicReaction'}
gmp_c	C10H12N5O8P	-2	Metabolite	GMP	{}	{}	c	{'TranscriptionReaction', 'MetabolicReaction', 'TranslationReaction'}
gp4g_c	C20H24N10O21P4	-4	Metabolite	P1,P4-Bis(5'-guanosyl) tetraphosphate	{}	{}	c	{'MetabolicReaction'}
grdp_c	C10H17O7P2	-3	Metabolite	Geranyl diphosphate	{}	{}	c	{'MetabolicReaction'}
gslnt_c	C10H16N3O6SSe	-1	Metabolite	Glutathiolselenolate	{}	{}	c	{'MetabolicReaction'}
gsn_c	C10H13N5O5	0	Metabolite	Guanosine	{}	{}	c	{'MetabolicReaction'}
gthox_c	C20H30N6O12S2	-2	Metabolite	Oxidized glutathione	{}	{}	c	{'MetabolicReaction'}
gthrd_c	C10H16N3O6S	-1	Metabolite	Reduced glutathione	{}	{}	c	{'MetabolicReaction'}
gtp_c	C10H12N5O14P3	-4	Metabolite	GTP	{}	{}	c	{'TranscriptionReaction', 'tRNAChargingReaction', 'TranslationReaction', 'PostTranslationReaction', 'ComplexFormation', 'MetabolicReaction'}
gtspmd_c	C17H36N6O5S	2	Metabolite	Glutathionylspermidine	{}	{}	c	{'MetabolicReaction'}
gua_c	C5H5N5O	0	Metabolite	Guanine	{}	{}	c	{'tRNAChargingReaction', 'MetabolicReaction'}
h_c	H	1	Metabolite	H+	{}	{}	c	{'TranscriptionReaction', 'tRNAChargingReaction', 'TranslationReaction', 'PostTranslationReaction', 'ComplexFormation', 'MetabolicReaction', 'SummaryVariable'}
h2_c	H2	0	Metabolite	H2	{}	{}	c	{'MetabolicReaction'}
h2mb4p_c	C5H9O8P2	-3	Metabolite	1-hydroxy-2-methyl-2-(E)-butenyl 4-diphosphate	{}	{}	c	{'MetabolicReaction'}
h2o_c	H2O	0	Metabolite	H2O	{}	{}	c	{'TranscriptionReaction', 'tRNAChargingReaction', 'TranslationReaction', 'PostTranslationReaction', 'ComplexFormation', 'MetabolicReaction', 'SummaryVariable'}
h2o2_c	H2O2	0	Metabolite	Hydrogen peroxide	{}	{}	c	{'MetabolicReaction'}
h2s_c	H2S	0	Metabolite	Hydrogen sulfide	{}	{}	c	{'MetabolicReaction'}
hco3_c	CHO3	-1	Metabolite	Bicarbonate	{}	{}	c	{'tRNAChargingReaction', 'ComplexFormation', 'MetabolicReaction'}
hcys__L_c	C4H9NO2S	0	Metabolite	L-Homocysteine	{}	{}	c	{'MetabolicReaction'}
hdca_c	C16H31O2	-1	Metabolite	Hexadecanoate (n-C16:0)	{}	{}	c	{'MetabolicReaction'}
hdcap_c	C16H32O5P	-1	Metabolite	Hexadecanoyl-phosphate (n-C16:0)	{}	{}	c	{'MetabolicReaction'}
hdcea_c	C16H29O2	-1	Metabolite	Hexadecenoate (n-C16:1)	{}	{}	c	{'MetabolicReaction'}
hdceap_c	C16H30O5P	-1	Metabolite	Hexadecanoyl-phosphate (n-C16:1)	{}	{}	c	{'MetabolicReaction'}
hdcoa_c	C37H60N7O17P3S	-4	Metabolite	Hexadecenoyl-CoA (n-C16:1CoA)	{}	{}	c	{'MetabolicReaction'}
hdd2coa_c	C37H60N7O17P3S	-4	Metabolite	trans-Hexadec-2-enoyl-CoA	{}	{}	c	{'MetabolicReaction'}
hemeO_c	C49H56FeN4O5	-2	Metabolite	Heme O	{}	{}	c	{'ComplexFormation', 'MetabolicReaction'}
hg2_c	Hg	2	Metabolite	Hg2+	{}	{}	c	{'MetabolicReaction'}
hhlipa_c	C124H220N2O51P2	-6	Metabolite	heptosyl-heptosyl-kdo2-lipidA	{}	{}	c	{'MetabolicReaction'}
his__L_c	C6H9N3O2	0	Metabolite	L-Histidine	{}	{}	c	{'tRNAChargingReaction', 'MetabolicReaction', 'TranslationReaction'}
hisp_c	C6H11N3O4P	-1	Metabolite	L-Histidinol phosphate	{}	{}	c	{'MetabolicReaction'}
histd_c	C6H12N3O	1	Metabolite	L-Histidinol	{}	{}	c	{'MetabolicReaction'}
hkndd_c	C9H8O6	-2	Metabolite	2-Hydroxy-6-oxonona-2,4-diene-1,9-dioate	{}	{}	c	{'MetabolicReaction'}
hkntd_c	C9H6O6	-2	Metabolite	2-hydroxy-6-ketononatrienedioate	{}	{}	c	{'MetabolicReaction'}
hlipa_c	C117H208N2O45P2	-6	Metabolite	heptosyl-kdo2-lipidA	{}	{}	c	{'MetabolicReaction'}
hmbil_c	C40H38N4O17	-8	Metabolite	Hydroxymethylbilane	{}	{}	c	{'MetabolicReaction'}
hmgth_c	C11H18N3O7S	-1	Metabolite	hydroxymethylglutathione	{}	{}	c	{'MetabolicReaction'}
hom__L_c	C4H9NO3	0	Metabolite	L-Homoserine	{}	{}	c	{'MetabolicReaction'}
hphhlipa_c	C131H231N2O60P3	-8	Metabolite	heptosyl-phospho-heptosyl-heptosyl-kdo2-lipidA	{}	{}	c	{'MetabolicReaction'}
hpyr_c	C3H3O4	-1	Metabolite	Hydroxypyruvate	{}	{}	c	{'MetabolicReaction'}
hqn_c	C6H6O2	0	Metabolite	Hydroquinone	{}	{}	c	{'MetabolicReaction'}
hx2coa_c	C27H40N7O17P3S	-4	Metabolite	trans-Hex-2-enoyl-CoA	{}	{}	c	{'MetabolicReaction'}
hxa_c	C6H11O2	-1	Metabolite	Hexanoate (n-C6:0)	{}	{}	c	{'MetabolicReaction'}
hxan_c	C5H4N4O	0	Metabolite	Hypoxanthine	{}	{}	c	{'MetabolicReaction'}
hxcoa_c	C27H42N7O17P3S	-4	Metabolite	Hexanoyl-CoA (n-C6:0CoA)	{}	{}	c	{'MetabolicReaction'}
iasp_c	C4H3NO4	-2	Metabolite	Iminoaspartate	{}	{}	c	{'MetabolicReaction'}
ichor_c	C10H8O6	-2	Metabolite	Isochorismate	{}	{}	c	{'MetabolicReaction'}
icit_c	C6H5O7	-3	Metabolite	Isocitrate	{}	{}	c	{'MetabolicReaction'}
icolipa_c	C145H251N2O74P4	-11	Metabolite	inner core oligosaccharide lipid A (E coli)	{}	{}	c	{'MetabolicReaction'}
idon__L_c	C6H11O7	-1	Metabolite	L-Idonate	{}	{}	c	{'MetabolicReaction'}
idp_c	C10H11N4O11P2	-3	Metabolite	IDP	{}	{}	c	{'MetabolicReaction'}
ile__L_c	C6H13NO2	0	Metabolite	L-Isoleucine	{}	{}	c	{'tRNAChargingReaction', 'MetabolicReaction', 'TranslationReaction'}
imacp_c	C6H7N2O5P	-2	Metabolite	3-(Imidazol-4-yl)-2-oxopropyl phosphate	{}	{}	c	{'MetabolicReaction'}
imp_c	C10H11N4O8P	-2	Metabolite	IMP	{}	{}	c	{'MetabolicReaction'}
indole_c	C8H7N	0	Metabolite	Indole	{}	{}	c	{'MetabolicReaction'}
inost_c	C6H12O6	0	Metabolite	myo-Inositol	{}	{}	c	{'MetabolicReaction'}
ins_c	C10H12N4O5	0	Metabolite	Inosine	{}	{}	c	{'MetabolicReaction'}
ipdp_c	C5H9O7P2	-3	Metabolite	Isopentenyl diphosphate	{}	{}	c	{'MetabolicReaction'}
isetac_c	C2H5O4S	-1	Metabolite	Isethionic acid	{}	{}	c	{'MetabolicReaction'}
itp_c	C10H11N4O14P3	-4	Metabolite	ITP	{}	{}	c	{'MetabolicReaction'}
k_c	K	1	Metabolite	potassium	{}	{}	c	{'ComplexFormation', 'MetabolicReaction'}
kdo_c	C8H13O8	-1	Metabolite	3-Deoxy-D-manno-2-octulosonate	{}	{}	c	{'MetabolicReaction'}
kdo2lipid4_c	C84H148N2O37P2	-6	Metabolite	KDO(2)-lipid IV(A)	{}	{}	c	{'MetabolicReaction'}
kdo8p_c	C8H12O11P	-3	Metabolite	3-Deoxy-D-manno-octulosonate 8-phosphate	{}	{}	c	{'MetabolicReaction'}
kdolipid4_c	C76H137N2O30P2	-5	Metabolite	KDO-lipid IV(A)	{}	{}	c	{'MetabolicReaction'}
kphphhlipa_c	C139H241N2O70P4	-11	Metabolite	kdo-phospho-heptosyl-phospho-heptosyl-heptosyl-kdo2-lipidA	{}	{}	c	{'MetabolicReaction'}
lac__D_c	C3H5O3	-1	Metabolite	D-Lactate	{}	{}	c	{'MetabolicReaction'}
lac__L_c	C3H5O3	-1	Metabolite	L-Lactate	{}	{}	c	{'MetabolicReaction'}
lald__D_c	C3H6O2	0	Metabolite	D-Lactaldehyde	{}	{}	c	{'MetabolicReaction'}
lald__L_c	C3H6O2	0	Metabolite	L-Lactaldehyde	{}	{}	c	{'MetabolicReaction'}
lcts_c	C12H22O11	0	Metabolite	Lactose	{}	{}	c	{'MetabolicReaction'}
leu__L_c	C6H13NO2	0	Metabolite	L-Leucine	{}	{}	c	{'tRNAChargingReaction', 'MetabolicReaction', 'TranslationReaction'}
lgt__S_c	C13H20N3O8S	-1	Metabolite	(R)-S-Lactoylglutathione	{}	{}	c	{'MetabolicReaction'}
lipa_c	C110H196N2O39P2	-6	Metabolite	KDO(2)-lipid (A)	{}	{}	c	{'MetabolicReaction'}
lipa_cold_c	C114H202N2O39P2	-6	Metabolite	cold adapted KDO(2)-lipid (A)	{}	{}	c	{'MetabolicReaction'}
lipidA_c	C68H126N2O23P2	-4	Metabolite	2,3,2'3'-Tetrakis(beta-hydroxymyristoyl)-D-glucosaminyl-1,6-beta-D-glucosamine 1,4'-bisphosphate	{}	{}	c	{'MetabolicReaction'}
lipidAds_c	C68H127N2O20P	-2	Metabolite	Lipid A Disaccharide	{}	{}	c	{'MetabolicReaction'}
lipidX_c	C34H64NO12P	-2	Metabolite	2,3-Bis(3-hydroxytetradecanoyl)-beta-D-glucosaminyl 1-phosphate	{}	{}	c	{'MetabolicReaction'}
lipoamp_c	C18H25N5O8PS2	-1	Metabolite	lipoyl-AMP	{}	{}	c	{'ComplexFormation', 'MetabolicReaction'}
lipoate_c	C8H14O2S2	0	Metabolite	Lipoate	{}	{}	c	{'MetabolicReaction'}
lys__L_c	C6H15N2O2	1	Metabolite	L-Lysine	{}	{}	c	{'tRNAChargingReaction', 'ComplexFormation', 'MetabolicReaction', 'TranslationReaction'}
lyx__L_c	C5H10O5	0	Metabolite	L-Lyxose	{}	{}	c	{'MetabolicReaction'}
mal__D_c	C4H4O5	-2	Metabolite	D-Malate	{}	{}	c	{'MetabolicReaction'}
mal__L_c	C4H4O5	-2	Metabolite	L-Malate	{}	{}	c	{'MetabolicReaction'}
malcoa_c	C24H33N7O19P3S	-5	Metabolite	Malonyl-CoA	{}	{}	c	{'MetabolicReaction'}
malcoame_c	C25H36N7O19P3S	-4	Metabolite	malonyl-CoA methyl ester	{}	{}	c	{'MetabolicReaction'}
malt_c	C12H22O11	0	Metabolite	Maltose	{}	{}	c	{'MetabolicReaction'}
malt6p_c	C12H21O14P	-2	Metabolite	Maltose 6'-phosphate	{}	{}	c	{'MetabolicReaction'}
malthp_c	C42H72O36	0	Metabolite	Maltoheptaose	{}	{}	c	{'MetabolicReaction'}
malthx_c	C36H62O31	0	Metabolite	Maltohexaose	{}	{}	c	{'MetabolicReaction'}
maltpt_c	C30H52O26	0	Metabolite	Maltopentaose	{}	{}	c	{'MetabolicReaction'}
malttr_c	C18H32O16	0	Metabolite	Maltotriose	{}	{}	c	{'MetabolicReaction'}
maltttr_c	C24H42O21	0	Metabolite	Maltotetraose	{}	{}	c	{'MetabolicReaction'}
man_c	C6H12O6	0	Metabolite	D-Mannose	{}	{}	c	{'MetabolicReaction'}
man1p_c	C6H11O9P	-2	Metabolite	D-Mannose 1-phosphate	{}	{}	c	{'MetabolicReaction'}
man6p_c	C6H11O9P	-2	Metabolite	D-Mannose 6-phosphate	{}	{}	c	{'MetabolicReaction'}
man6pglyc_c	C9H14O12P	-3	Metabolite	2(alpha-D-Mannosyl-6-phosphate)-D-glycerate	{}	{}	c	{'MetabolicReaction'}
mana_c	C6H11O7	-1	Metabolite	D-Mannonate	{}	{}	c	{'MetabolicReaction'}
mdhdhf_c	C5H8O4	0	Metabolite	(2R,4S)-2-methyl-2,4-dihydroxydihydrofuran-3-one	{}	{}	c	{'MetabolicReaction'}
melib_c	C12H22O11	0	Metabolite	Melibiose	{}	{}	c	{'MetabolicReaction'}
meoh_c	CH4O1	0	Metabolite	Methanol	{}	{}	c	{'MetabolicReaction'}
mercppyr_c	C3H3O3S	-1	Metabolite	Mercaptopyruvate	{}	{}	c	{'MetabolicReaction'}
met__D_c	C5H10NO2S	0	Metabolite	D-Methionine	{}	{}	c	{'MetabolicReaction'}
met__L_c	C5H11NO2S	0	Metabolite	L-Methionine	{}	{}	c	{'tRNAChargingReaction', 'ComplexFormation', 'MetabolicReaction', 'TranslationReaction'}
methf_c	C20H20N7O6	-1	Metabolite	5,10-Methenyltetrahydrofolate	{}	{}	c	{'MetabolicReaction'}
metsox__R__L_c	C5H11NO3S	0	Metabolite	L-methionine-R-sulfoxide	{}	{}	c	{'MetabolicReaction'}
metsox__S__L_c	C5H11NO3S	0	Metabolite	L-Methionine Sulfoxide	{}	{}	c	{'MetabolicReaction'}
mg2_c	Mg	2	Metabolite	magnesium	{}	{}	c	{'ComplexFormation', 'MetabolicReaction'}
mi1p__D_c	C6H11O9P	-2	Metabolite	1D-myo-Inositol 1-phosphate	{}	{}	c	{'MetabolicReaction'}
micit_c	C7H7O7	-3	Metabolite	methylisocitrate	{}	{}	c	{'MetabolicReaction'}
mlthf_c	C20H21N7O6	-2	Metabolite	5,10-Methylenetetrahydrofolate	{}	{}	c	{'MetabolicReaction', 'SummaryVariable'}
mmcoa__S_c	C25H35N7O19P3S	-5	Metabolite	(S)-Methylmalonyl-CoA	{}	{}	c	{'MetabolicReaction'}
mmet_c	C6H14NO2S	1	Metabolite	S-Methyl-L-methionine	{}	{}	c	{'MetabolicReaction'}
mn2_c	Mn	2	Metabolite	Mn2+	{}	{}	c	{'ComplexFormation', 'MetabolicReaction'}
mnl1p_c	C6H13O9P	-2	Metabolite	D-Mannitol 1-phosphate	{}	{}	c	{'MetabolicReaction'}
mobd_c	MoO4	-2	Metabolite	Molybdate	{}	{}	c	{'MetabolicReaction'}
moco_c	C10H10N5O8PS2Mo	-2	Metabolite	molybdenum cofactor	{}	{}	c	{'MetabolicReaction'}
mococdp_c	C19H22N8O15P2S2Mo	-2	Metabolite	molybdopterin cytosine dinucleotide	{}	{}	c	{'MetabolicReaction'}
mocogdp_c	C20H22N10O15P2S2Mo	-2	Metabolite	molybdopterin guanine dinucleotide	{}	{}	c	{'MetabolicReaction'}
mpt_c	C10H10N5O6PS2Cu	-2	Metabolite	molybdopterin	{}	{}	c	{'MetabolicReaction'}
mptamp_c	C20H22N10O12P2S2Cu	-2	Metabolite	adenylated molybdopterin	{}	{}	c	{'MetabolicReaction'}
mql8_c	C51H74O2	0	Metabolite	Menaquinol 8	{}	{}	c	{'MetabolicReaction'}
mqn8_c	C51H72O2	0	Metabolite	Menaquinone 8	{}	{}	c	{'MetabolicReaction'}
msa_c	C3H3O3	-1	Metabolite	Malonate semialdehyde	{}	{}	c	{'MetabolicReaction'}
mso3_c	CH3O3S	-1	Metabolite	methanesulfonate	{}	{}	c	{'MetabolicReaction'}
mthgxl_c	C3H4O2	0	Metabolite	Methylglyoxal	{}	{}	c	{'MetabolicReaction'}
mththf_c	C5H10O5	0	Metabolite	(2R,4S)-2-methyl-2,3,3,4-tetrahydroxytetrahydrofuran	{}	{}	c	{'MetabolicReaction', 'MEReaction'}
n2o_c	N2O	0	Metabolite	Nitrous oxide	{}	{}	c	{'MetabolicReaction'}
n8aspmd_c	C9H23N3O	2	Metabolite	N8-Acetylspermidine	{}	{}	c	{'MetabolicReaction'}
na1_c	Na	1	Metabolite	Sodium	{}	{}	c	{'ComplexFormation', 'MetabolicReaction'}
na15dap_c	C8H24N3	3	Metabolite	N-3-aminopropyl-1,5-diaminopentane	{}	{}	c	{'MetabolicReaction'}
nac_c	C6H4NO2	-1	Metabolite	Nicotinate	{}	{}	c	{'MetabolicReaction'}
nad_c	C21H26N7O14P2	-1	Metabolite	Nicotinamide adenine dinucleotide	{}	{}	c	{'ComplexFormation', 'MetabolicReaction', 'SummaryVariable'}
nadh_c	C21H27N7O14P2	-2	Metabolite	Nicotinamide adenine dinucleotide - reduced	{}	{}	c	{'ComplexFormation', 'MetabolicReaction'}
nadp_c	C21H25N7O17P3	-3	Metabolite	Nicotinamide adenine dinucleotide phosphate	{}	{}	c	{'tRNAChargingReaction', 'ComplexFormation', 'MetabolicReaction', 'SummaryVariable'}
nadph_c	C21H26N7O17P3	-4	Metabolite	Nicotinamide adenine dinucleotide phosphate - reduced	{}	{}	c	{'tRNAChargingReaction', 'ComplexFormation', 'MetabolicReaction'}
ncam_c	C6H6N2O	0	Metabolite	Nicotinamide	{}	{}	c	{'MetabolicReaction'}
nh4_c	H4N	1	Metabolite	Ammonium	{}	{}	c	{'tRNAChargingReaction', 'ComplexFormation', 'MetabolicReaction'}
ni2_c	Ni	2	Metabolite	nickel	{}	{}	c	{'ComplexFormation', 'MetabolicReaction'}
nicrnt_c	C11H12NO9P	-2	Metabolite	Nicotinate D-ribonucleotide	{}	{}	c	{'MetabolicReaction'}
nmn_c	C11H14N2O8P	-1	Metabolite	NMN	{}	{}	c	{'MetabolicReaction'}
no_c	NO	0	Metabolite	Nitric oxide	{}	{}	c	{'MetabolicReaction'}
no2_c	NO2	-1	Metabolite	Nitrite	{}	{}	c	{'MetabolicReaction'}
no3_c	NO3	-1	Metabolite	Nitrate	{}	{}	c	{'MetabolicReaction'}
o16aund_c	C89H145N1O32P2	-2	Metabolite	O16 antigen undecaprenyl diphosphate	{}	{}	c	{'MetabolicReaction'}
o2_c	O2	0	Metabolite	O2	{}	{}	c	{'MetabolicReaction'}
o2s_c	O2	-1	Metabolite	Superoxide anion	{}	{}	c	{'MetabolicReaction'}
oaa_c	C4H2O5	-2	Metabolite	Oxaloacetate	{}	{}	c	{'MetabolicReaction'}
oc2coa_c	C29H44N7O17P3S	-4	Metabolite	trans-Oct-2-enoyl-CoA	{}	{}	c	{'MetabolicReaction'}
occoa_c	C29H46N7O17P3S	-4	Metabolite	Octanoyl-CoA (n-C8:0CoA)	{}	{}	c	{'MetabolicReaction'}
ocdca_c	C18H35O2	-1	Metabolite	octadecanoate (n-C18:0)	{}	{}	c	{'MetabolicReaction'}
ocdcap_c	C18H36O5P	-1	Metabolite	Octadecanoyl-phosphate (n-C18:0)	{}	{}	c	{'MetabolicReaction'}
ocdcea_c	C18H33O2	-1	Metabolite	octadecenoate (n-C18:1)	{}	{}	c	{'MetabolicReaction'}
ocdceap_c	C18H34O5P	-1	Metabolite	Octadecanoyl-phosphate (n-C18:1)	{}	{}	c	{'MetabolicReaction'}
octa_c	C8H15O2	-1	Metabolite	octanoate (n-C8:0)	{}	{}	c	{'MetabolicReaction'}
octdp_c	C40H65O7P2	-3	Metabolite	all-trans-Octaprenyl diphosphate	{}	{}	c	{'MetabolicReaction'}
od2coa_c	C39H64N7O17P3S	-4	Metabolite	trans-Octadec-2-enoyl-CoA	{}	{}	c	{'MetabolicReaction'}
odecoa_c	C39H64N7O17P3S	-4	Metabolite	Octadecenoyl-CoA (n-C18:1CoA)	{}	{}	c	{'MetabolicReaction'}
ohpb_c	C4H4O8P	-3	Metabolite	2-Oxo-3-hydroxy-4-phosphobutanoate	{}	{}	c	{'MetabolicReaction'}
op4en_c	C5H5O3	-1	Metabolite	2-Oxopent-4-enoate	{}	{}	c	{'MetabolicReaction'}
orn_c	C5H13N2O2	1	Metabolite	Ornithine	{}	{}	c	{'MetabolicReaction'}
orot_c	C5H3N2O4	-1	Metabolite	Orotate	{}	{}	c	{'MetabolicReaction'}
orot5p_c	C10H10N2O11P	-3	Metabolite	Orotidine 5'-phosphate	{}	{}	c	{'MetabolicReaction'}
oxa_c	C2O4	-2	Metabolite	Oxalate	{}	{}	c	{'MetabolicReaction'}
oxadpcoa_c	C27H37N7O20P3S	-5	Metabolite	3-Oxoadipyl-CoA	{}	{}	c	{'MetabolicReaction'}
oxalcoa_c	C23H31N7O19P3S	-5	Metabolite	Oxalyl-CoA	{}	{}	c	{'MetabolicReaction'}
oxam_c	C2H2NO3	-1	Metabolite	Oxamate	{}	{}	c	{'MetabolicReaction', 'MEReaction'}
oxur_c	C3H3N2O4	-1	Metabolite	Oxalureate	{}	{}	c	{'MetabolicReaction'}
pa120_c	C27H51O8P1	-2	Metabolite	1,2-didodecanoyl-sn-glycerol 3-phosphate	{}	{}	c	{'MetabolicReaction'}
pa140_c	C31H59O8P1	-2	Metabolite	1,2-ditetradecanoyl-sn-glycerol 3-phosphate	{}	{}	c	{'MetabolicReaction'}
pa141_c	C31H55O8P1	-2	Metabolite	1,2-ditetradec-7-enoyl-sn-glycerol 3-phosphate	{}	{}	c	{'MetabolicReaction'}
pa160_c	C35H67O8P1	-2	Metabolite	1,2-dihexadecanoyl-sn-glycerol 3-phosphate	{}	{}	c	{'MetabolicReaction'}
pa161_c	C35H63O8P1	-2	Metabolite	1,2-dihexadec-9-enoyl-sn-glycerol 3-phosphate	{}	{}	c	{'MetabolicReaction'}
pa180_c	C39H75O8P1	-2	Metabolite	1,2-dioctadecanoyl-sn-glycerol 3-phosphate	{}	{}	c	{'MetabolicReaction'}
pa181_c	C39H71O8P1	-2	Metabolite	1,2-dioctadec-11-enoyl-sn-glycerol 3-phosphate	{}	{}	c	{'MetabolicReaction'}
pac_c	C8H7O2	-1	Metabolite	Phenylacetic acid	{}	{}	c	{'MetabolicReaction'}
pacald_c	C8H8O	0	Metabolite	Phenylacetaldehyde	{}	{}	c	{'MetabolicReaction'}
pan4p_c	C11H21N2O7PS	-2	Metabolite	Pantetheine 4'-phosphate	{}	{}	c	{'MetabolicReaction'}
pant__R_c	C6H11O4	-1	Metabolite	(R)-Pantoate	{}	{}	c	{'MetabolicReaction'}
pap_c	C10H11N5O10P2	-4	Metabolite	Adenosine 3',5'-bisphosphate	{}	{}	c	{'MetabolicReaction'}
paps_c	C10H11N5O13P2S	-4	Metabolite	3'-Phosphoadenylyl sulfate	{}	{}	c	{'MetabolicReaction'}
pdx5p_c	C8H10NO6P	-2	Metabolite	Pyridoxine 5'-phosphate	{}	{}	c	{'MetabolicReaction'}
pe120_c	C29H58N1O8P1	0	Metabolite	phosphatidylethanolamine (didodecanoyl, n-C12:0)	{}	{}	c	{'MetabolicReaction'}
pe140_c	C33H66N1O8P1	0	Metabolite	phosphatidylethanolamine (ditetradecanoyl, n-C14:0)	{}	{}	c	{'MetabolicReaction'}
pe141_c	C33H62N1O8P1	0	Metabolite	phosphatidylethanolamine (ditetradec-7-enoyl, n-C14:1)	{}	{}	c	{'MetabolicReaction'}
pe160_c	C37H74N1O8P1	0	Metabolite	phosphatidylethanolamine (dihexadecanoyl, n-C16:0)	{}	{}	c	{'MetabolicReaction', 'SummaryVariable'}
pe161_c	C37H70N1O8P1	0	Metabolite	phosphatidylethanolamine (dihexadec-9enoyl, n-C16:1)	{}	{}	c	{'MetabolicReaction', 'SummaryVariable'}
pe180_c	C41H82N1O8P1	0	Metabolite	phosphatidylethanolamine (dioctadecanoyl, n-C18:0)	{}	{}	c	{'MetabolicReaction'}
pe181_c	C41H78N1O8P1	0	Metabolite	phosphatidylethanolamine (dioctadec-11-enoyl, n-C18:1)	{}	{}	c	{'MetabolicReaction'}
pep_c	C3H2O6P	-3	Metabolite	Phosphoenolpyruvate	{}	{}	c	{'MetabolicReaction'}
pg120_c	C30H58O10P1	-1	Metabolite	Phosphatidylglycerol (didodecanoyl, n-C12:0)	{}	{}	c	{'MetabolicReaction'}
pg140_c	C34H66O10P1	-1	Metabolite	Phosphatidylglycerol (ditetradecanoyl, n-C14:0)	{}	{}	c	{'MetabolicReaction'}
pg141_c	C34H62O10P1	-1	Metabolite	Phosphatidylglycerol (ditetradec-7-enoyl, n-C14:1)	{}	{}	c	{'MetabolicReaction'}
pg160_c	C38H74O10P1	-1	Metabolite	Phosphatidylglycerol (dihexadecanoyl, n-C16:0)	{}	{}	c	{'MetabolicReaction'}
pg161_c	C38H70O10P1	-1	Metabolite	Phosphatidylglycerol (dihexadec-9-enoyl, n-C16:1)	{}	{}	c	{'MetabolicReaction'}
pg180_c	C42H82O10P1	-1	Metabolite	Phosphatidylglycerol (dioctadecanoyl, n-C18:0)	{}	{}	c	{'MetabolicReaction'}
pg181_c	C42H78O10P1	-1	Metabolite	Phosphatidylglycerol (dioctadec-11-enoyl, n-C18:1)	{}	{}	c	{'MetabolicReaction'}
pgp120_c	C30H57O13P2	-3	Metabolite	Phosphatidylglycerophosphate (didodecanoyl, n-C12:0)	{}	{}	c	{'MetabolicReaction'}
pgp140_c	C34H65O13P2	-3	Metabolite	Phosphatidylglycerophosphate (ditetradecanoyl, n-C14:0)	{}	{}	c	{'MetabolicReaction'}
pgp141_c	C34H61O13P2	-3	Metabolite	Phosphatidylglycerophosphate (ditetradec-7-enoyl, n-C14:1)	{}	{}	c	{'MetabolicReaction'}
pgp160_c	C38H73O13P2	-3	Metabolite	Phosphatidylglycerophosphate (dihexadecanoyl, n-C16:0)	{}	{}	c	{'MetabolicReaction'}
pgp161_c	C38H69O13P2	-3	Metabolite	Phosphatidylglycerophosphate (dihexadec-9-enoyl, n-C16:1)	{}	{}	c	{'MetabolicReaction'}
pgp180_c	C42H81O13P2	-3	Metabolite	Phosphatidylglycerophosphate (dioctadecanoyl, n-C18:0)	{}	{}	c	{'MetabolicReaction'}
pgp181_c	C42H77O13P2	-3	Metabolite	Phosphatidylglycerophosphate (dioctadec-11-enoyl, n-C18:1)	{}	{}	c	{'MetabolicReaction'}
phaccoa_c	C29H38N7O17P3S	-4	Metabolite	Phenylacetyl-CoA	{}	{}	c	{'MetabolicReaction'}
phe__L_c	C9H11NO2	0	Metabolite	L-Phenylalanine	{}	{}	c	{'tRNAChargingReaction', 'MetabolicReaction', 'TranslationReaction'}
pheme_c	C34H30FeN4O4	-2	Metabolite	Protoheme	{}	{}	c	{'ComplexFormation', 'MetabolicReaction'}
phhlipa_c	C124H219N2O54P3	-8	Metabolite	phospho-heptosyl-heptosyl-kdo2-lipidA	{}	{}	c	{'MetabolicReaction'}
phom_c	C4H8NO6P	-2	Metabolite	O-Phospho-L-homoserine	{}	{}	c	{'MetabolicReaction'}
phphhlipa_c	C131H230N2O63P4	-10	Metabolite	phospho-heptosyl-phospho-heptosyl-heptosyl-kdo2-lipidA	{}	{}	c	{'MetabolicReaction'}
phpyr_c	C9H7O3	-1	Metabolite	Phenylpyruvate	{}	{}	c	{'tRNAChargingReaction', 'MetabolicReaction'}
phthr_c	C4H8NO7P	-2	Metabolite	O-Phospho-4-hydroxy-L-threonine	{}	{}	c	{'MetabolicReaction'}
pi_c	HO4P	-2	Metabolite	Phosphate	{}	{}	c	{'TranscriptionReaction', 'tRNAChargingReaction', 'TranslationReaction', 'PostTranslationReaction', 'ComplexFormation', 'MetabolicReaction', 'SummaryVariable'}
pmtcoa_c	C37H62N7O17P3S	-4	Metabolite	Palmitoyl-CoA (n-C16:0CoA)	{}	{}	c	{'MetabolicReaction'}
pnto__R_c	C9H16NO5	-1	Metabolite	(R)-Pantothenate	{}	{}	c	{'MetabolicReaction'}
poaac_c	C3H5NO3	0	Metabolite	Peroxyaminoacrylate	{}	{}	c	{'MetabolicReaction'}
ppa_c	C3H5O2	-1	Metabolite	Propionate (n-C3:0)	{}	{}	c	{'MetabolicReaction'}
ppal_c	C3H6O	0	Metabolite	Propanal	{}	{}	c	{'MetabolicReaction'}
ppap_c	C3H5O5P	-2	Metabolite	Propanoyl phosphate	{}	{}	c	{'MetabolicReaction'}
ppbng_c	C10H13N2O4	-1	Metabolite	Porphobilinogen	{}	{}	c	{'MetabolicReaction'}
ppcoa_c	C24H36N7O17P3S	-4	Metabolite	Propanoyl-CoA	{}	{}	c	{'MetabolicReaction'}
ppgpp_c	C10H11N5O17P4	-6	Metabolite	Guanosine 3',5'-bis(diphosphate)	{}	{}	c	{'MetabolicReaction'}
pphn_c	C10H8O6	-2	Metabolite	Prephenate	{}	{}	c	{'tRNAChargingReaction', 'MetabolicReaction'}
ppi_c	HO7P2	-3	Metabolite	Diphosphate	{}	{}	c	{'TranscriptionReaction', 'tRNAChargingReaction', 'TranslationReaction', 'ComplexFormation', 'MetabolicReaction', 'SummaryVariable'}
ppp9_c	C34H32N4O4	-2	Metabolite	Protoporphyrin	{}	{}	c	{'MetabolicReaction'}
pppg9_c	C34H38N4O4	-2	Metabolite	Protoporphyrinogen IX	{}	{}	c	{'MetabolicReaction'}
pppi_c	HO10P3	-4	Metabolite	Inorganic triphosphate	{}	{}	c	{'MetabolicReaction'}
pppn_c	C9H9O2	-1	Metabolite	Phenylpropanoate	{}	{}	c	{'MetabolicReaction'}
pram_c	C5H11NO7P	-1	Metabolite	5-Phospho-beta-D-ribosylamine	{}	{}	c	{'MetabolicReaction'}
pran_c	C12H13NO9P	-3	Metabolite	N-(5-Phospho-D-ribosyl)anthranilate	{}	{}	c	{'MetabolicReaction'}
prbamp_c	C15H19N5O14P2	-4	Metabolite	1-(5-Phosphoribosyl)-AMP	{}	{}	c	{'MetabolicReaction'}
prbatp_c	C15H19N5O20P4	-6	Metabolite	1-(5-Phosphoribosyl)-ATP	{}	{}	c	{'MetabolicReaction'}
preq0_c	C7H5N5O	0	Metabolite	7-cyano-7-carbaguanine	{}	{}	c	{'MetabolicReaction'}
preq1_c	C7H10N5O	1	Metabolite	7-aminomethyl-7-deazaguanine	{}	{}	c	{'tRNAChargingReaction', 'MetabolicReaction'}
prfp_c	C15H21N5O15P2	-4	Metabolite	1-(5-Phosphoribosyl)-5-[(5-phosphoribosylamino)methylideneamino]imidazole-4-carboxamide	{}	{}	c	{'MetabolicReaction'}
prlp_c	C15H21N5O15P2	-4	Metabolite	5-[(5-phospho-1-deoxyribulos-1-ylamino)methylideneamino]-1-(5-phosphoribosyl)imidazole-4-carboxamide	{}	{}	c	{'MetabolicReaction'}
pro__L_c	C5H9NO2	0	Metabolite	L-Proline	{}	{}	c	{'tRNAChargingReaction', 'MetabolicReaction', 'TranslationReaction'}
progly_c	C7H12N2O3	0	Metabolite	L-Prolinylglycine	{}	{}	c	{'MetabolicReaction'}
prpp_c	C5H8O14P3	-5	Metabolite	5-Phospho-alpha-D-ribose 1-diphosphate	{}	{}	c	{'MetabolicReaction'}
ps120_c	C30H57N1O10P1	-1	Metabolite	phosphatidylserine (didodecanoyl, n-C12:0)	{}	{}	c	{'MetabolicReaction'}
ps140_c	C34H65N1O10P1	-1	Metabolite	phosphatidylserine (ditetradecanoyl, n-C14:0)	{}	{}	c	{'MetabolicReaction'}
ps141_c	C34H61N1O10P1	-1	Metabolite	phosphatidylserine (ditetradec-7-enoyl, n-C14:1)	{}	{}	c	{'MetabolicReaction'}
ps160_c	C38H73N1O10P1	-1	Metabolite	phosphatidylserine (dihexadecanoyl, n-C16:0)	{}	{}	c	{'MetabolicReaction'}
ps161_c	C38H69N1O10P1	-1	Metabolite	phosphatidylserine (dihexadec-9-enoyl, n-C16:1)	{}	{}	c	{'MetabolicReaction'}
ps180_c	C42H81N1O10P1	-1	Metabolite	phosphatidylserine (dioctadecanoyl, n-C18:0)	{}	{}	c	{'MetabolicReaction'}
ps181_c	C42H77N1O10P1	-1	Metabolite	phosphatidylserine (dioctadec-11-enoyl, n-C18:1)	{}	{}	c	{'MetabolicReaction'}
psclys_c	C12H25N2O7	1	Metabolite	psicoselysine	{}	{}	c	{'MetabolicReaction'}
pser__L_c	C3H6NO6P	-2	Metabolite	O-Phospho-L-serine	{}	{}	c	{'MetabolicReaction'}
ptrc_c	C4H14N2	2	Metabolite	Putrescine	{}	{}	c	{'MetabolicReaction'}
pyam5p_c	C8H12N2O5P	-1	Metabolite	Pyridoxamine 5'-phosphate	{}	{}	c	{'MetabolicReaction'}
pydam_c	C8H13N2O2	1	Metabolite	Pyridoxamine	{}	{}	c	{'MetabolicReaction'}
pydx_c	C8H9NO3	0	Metabolite	Pyridoxal	{}	{}	c	{'MetabolicReaction'}
pydx5p_c	C8H8NO6P	-2	Metabolite	Pyridoxal 5'-phosphate	{}	{}	c	{'ComplexFormation', 'MetabolicReaction'}
pydxn_c	C8H11NO3	0	Metabolite	Pyridoxine	{}	{}	c	{'MetabolicReaction'}
pyr_c	C3H3O3	-1	Metabolite	Pyruvate	{}	{}	c	{'MetabolicReaction'}
q8_c	C49H74O4	0	Metabolite	Ubiquinone-8	{}	{}	c	{'MetabolicReaction'}
q8h2_c	C49H76O4	0	Metabolite	Ubiquinol-8	{}	{}	c	{'MetabolicReaction'}
quin_c	C7H12O6	0	Metabolite	Quinate	{}	{}	c	{'MetabolicReaction'}
quln_c	C7H3NO4	-2	Metabolite	Quinolinate	{}	{}	c	{'MetabolicReaction'}
r15bp_c	C5H8O11P2	-4	Metabolite	D-Ribose 1,5-bisphosphate	{}	{}	c	{'MetabolicReaction'}
r1p_c	C5H9O8P	-2	Metabolite	alpha-D-Ribose 1-phosphate	{}	{}	c	{'MetabolicReaction'}
r5p_c	C5H9O8P	-2	Metabolite	alpha-D-Ribose 5-phosphate	{}	{}	c	{'MetabolicReaction'}
ragund_c	C69H113N1O16P2	-2	Metabolite	rhamanosyl-N-acetylglucosamyl-undecaprenyl diphosphate	{}	{}	c	{'MetabolicReaction'}
rbflvrd_c	C17H22N4O6	0	Metabolite	Reduced riboflavin	{}	{}	c	{'MetabolicReaction'}
rbl__L_c	C5H10O5	0	Metabolite	L-Ribulose	{}	{}	c	{'MetabolicReaction'}
rdmbzi_c	C14H18N2O4	0	Metabolite	N1-(alpha-D-ribosyl)-5,6-dimethylbenzimidazole	{}	{}	c	{'MetabolicReaction'}
rephaccoa_c	C29H38N7O18P3S	-4	Metabolite	Ring 1,2-epoxyphenylacetyl-CoA	{}	{}	c	{'MetabolicReaction'}
rhcys_c	C9H17NO6S	0	Metabolite	S-Ribosyl-L-homocysteine	{}	{}	c	{'MetabolicReaction'}
rib__D_c	C5H10O5	0	Metabolite	D-Ribose	{}	{}	c	{'MetabolicReaction'}
ribflv_c	C17H20N4O6	0	Metabolite	Riboflavin	{}	{}	c	{'MetabolicReaction', 'SummaryVariable'}
rml_c	C6H12O5	0	Metabolite	L-Rhamnulose	{}	{}	c	{'MetabolicReaction'}
rml1p_c	C6H11O8P	-2	Metabolite	L-Rhamnulose 1-phosphate	{}	{}	c	{'MetabolicReaction'}
rmn_c	C6H12O5	0	Metabolite	L-Rhamnose	{}	{}	c	{'MetabolicReaction'}
ru5p__D_c	C5H9O8P	-2	Metabolite	D-Ribulose 5-phosphate	{}	{}	c	{'MetabolicReaction'}
ru5p__L_c	C5H9O8P	-2	Metabolite	L-Ribulose 5-phosphate	{}	{}	c	{'MetabolicReaction'}
s17bp_c	C7H12O13P2	-4	Metabolite	Sedoheptulose 1,7-bisphosphate	{}	{}	c	{'MetabolicReaction'}
s7p_c	C7H13O10P	-2	Metabolite	Sedoheptulose 7-phosphate	{}	{}	c	{'MetabolicReaction'}
sarcs_c	C3H7NO2	0	Metabolite	Sarcosine	{}	{}	c	{'MetabolicReaction'}
sbt6p_c	C6H13O9P	-2	Metabolite	D-Sorbitol 6-phosphate	{}	{}	c	{'MetabolicReaction'}
sbzcoa_c	C32H39N7O20P3S	-5	Metabolite	O-Succinylbenzoyl-CoA	{}	{}	c	{'MetabolicReaction'}
scl_c	C42H39N4O16	-7	Metabolite	sirohydrochlorin	{}	{}	c	{'MetabolicReaction'}
sel_c	O4Se	-2	Metabolite	Selenate	{}	{}	c	{'MetabolicReaction'}
seln_c	HSe	-1	Metabolite	Selenide	{}	{}	c	{'MetabolicReaction'}
selnp_c	H2O3PSe	-1	Metabolite	Selenophosphate	{}	{}	c	{'MetabolicReaction', 'TranslationReaction'}
ser__D_c	C3H7NO3	0	Metabolite	D-Serine	{}	{}	c	{'MetabolicReaction'}
ser__L_c	C3H7NO3	0	Metabolite	L-Serine	{}	{}	c	{'tRNAChargingReaction', 'MetabolicReaction', 'TranslationReaction'}
seramp_c	C13H19N6O9P	0	Metabolite	L-seryl-AMP	{}	{}	c	{'MetabolicReaction'}
sheme_c	C42H36FeN4O16	-8	Metabolite	Siroheme	{}	{}	c	{'ComplexFormation', 'MetabolicReaction'}
skm_c	C7H9O5	-1	Metabolite	Shikimate	{}	{}	c	{'MetabolicReaction'}
skm5p_c	C7H8O8P	-3	Metabolite	Shikimate 5-phosphate	{}	{}	c	{'MetabolicReaction'}
sl26da_c	C11H16N2O7	-2	Metabolite	N-Succinyl-LL-2,6-diaminoheptanedioate	{}	{}	c	{'MetabolicReaction'}
sl2a6o_c	C11H12NO8	-3	Metabolite	N-Succinyl-2-L-amino-6-oxoheptanedioate	{}	{}	c	{'MetabolicReaction'}
slnt_c	O3Se	-2	Metabolite	selenite	{}	{}	c	{'MetabolicReaction'}
so2_c	O2S	0	Metabolite	sulfur dioxide	{}	{}	c	{'MetabolicReaction'}
so3_c	O3S	-2	Metabolite	Sulfite	{}	{}	c	{'MetabolicReaction'}
so4_c	O4S	-2	Metabolite	Sulfate	{}	{}	c	{'MetabolicReaction'}
spmd_c	C7H22N3	3	Metabolite	Spermidine	{}	{}	c	{'MetabolicReaction'}
stcoa_c	C39H66N7O17P3S	-4	Metabolite	Stearoyl-CoA (n-C18:0CoA)	{}	{}	c	{'MetabolicReaction'}
suc6p_c	C12H21O14P	-2	Metabolite	Sucrose 6-phosphate	{}	{}	c	{'MetabolicReaction'}
sucarg_c	C10H17N4O5	-1	Metabolite	N2-Succinyl-L-arginine	{}	{}	c	{'MetabolicReaction'}
sucbz_c	C11H8O5	-2	Metabolite	o-Succinylbenzoate	{}	{}	c	{'MetabolicReaction'}
succ_c	C4H4O4	-2	Metabolite	Succinate	{}	{}	c	{'MetabolicReaction'}
succoa_c	C25H35N7O19P3S	-5	Metabolite	Succinyl-CoA	{}	{}	c	{'MetabolicReaction'}
sucglu_c	C9H10NO7	-3	Metabolite	N2-Succinyl-L-glutamate	{}	{}	c	{'MetabolicReaction'}
sucgsa_c	C9H11NO6	-2	Metabolite	N2-Succinyl-L-glutamate 5-semialdehyde	{}	{}	c	{'MetabolicReaction'}
suchms_c	C8H12NO6	-1	Metabolite	O-Succinyl-L-homoserine	{}	{}	c	{'MetabolicReaction'}
sucorn_c	C9H15N2O5	-1	Metabolite	N2-Succinyl-L-ornithine	{}	{}	c	{'MetabolicReaction'}
sucsal_c	C4H5O3	-1	Metabolite	Succinic semialdehyde	{}	{}	c	{'MetabolicReaction'}
sulfac_c	C2H2O5S	-2	Metabolite	sulfoacetate	{}	{}	c	{'MetabolicReaction'}
tag6p__D_c	C6H11O9P	-2	Metabolite	D-Tagatose 6-phosphate	{}	{}	c	{'MetabolicReaction'}
tagdp__D_c	C6H10O12P2	-4	Metabolite	D-Tagatose 1,6-biphosphate	{}	{}	c	{'MetabolicReaction'}
tagur_c	C6H9O7	-1	Metabolite	D-Tagaturonate	{}	{}	c	{'MetabolicReaction'}
tartr__D_c	C4H4O6	-2	Metabolite	D-tartrate	{}	{}	c	{'MetabolicReaction'}
tartr__L_c	C4H4O6	-2	Metabolite	L-tartrate	{}	{}	c	{'MetabolicReaction'}
taur_c	C2H7NO3S	0	Metabolite	Taurine	{}	{}	c	{'MetabolicReaction'}
tcynt_c	CNS	-1	Metabolite	Thiocyanate	{}	{}	c	{'MetabolicReaction'}
td2coa_c	C35H56N7O17P3S	-4	Metabolite	trans-Tetradec-2-enoyl-CoA	{}	{}	c	{'MetabolicReaction'}
tdcoa_c	C35H58N7O17P3S	-4	Metabolite	Tetradecanoyl-CoA (n-C14:0CoA)	{}	{}	c	{'MetabolicReaction'}
tdecoa_c	C35H56N7O17P3S	-4	Metabolite	Tetradecenoyl-CoA (n-C14:1CoA)	{}	{}	c	{'MetabolicReaction'}
thdp_c	C7H7NO4	-2	Metabolite	2,3,4,5-Tetrahydrodipicolinate	{}	{}	c	{'MetabolicReaction'}
thf_c	C19H21N7O6	-2	Metabolite	5,6,7,8-Tetrahydrofolate	{}	{}	c	{'tRNAChargingReaction', 'MetabolicReaction', 'SummaryVariable', 'TranslationReaction'}
thm_c	C12H17N4OS	1	Metabolite	Thiamin	{}	{}	c	{'MetabolicReaction'}
thmmp_c	C12H16N4O4PS	-1	Metabolite	Thiamin monophosphate	{}	{}	c	{'MetabolicReaction'}
thmnp_c	C9H15N5O4	0	Metabolite	Tetrahydromonapterin	{}	{}	c	{'MetabolicReaction'}
thmpp_c	C12H16N4O7P2S	-2	Metabolite	Thiamine diphosphate	{}	{}	c	{'ComplexFormation', 'MetabolicReaction'}
thptdn_c	C6H10N4	2	Metabolite	5,6,7,8-tetrahydropteridine	{}	{}	c	{'MetabolicReaction'}
thr__L_c	C4H9NO3	0	Metabolite	L-Threonine	{}	{}	c	{'tRNAChargingReaction', 'MetabolicReaction', 'TranslationReaction'}
thym_c	C5H6N2O2	0	Metabolite	Thymine	{}	{}	c	{'MetabolicReaction'}
thymd_c	C10H14N2O5	0	Metabolite	Thymidine	{}	{}	c	{'MetabolicReaction'}
tma_c	C3H10N	1	Metabolite	trimethylamine	{}	{}	c	{'MetabolicReaction'}
tmao_c	C3H9NO	0	Metabolite	Trimethylamine N-oxide	{}	{}	c	{'MetabolicReaction'}
tre_c	C12H22O11	0	Metabolite	Trehalose	{}	{}	c	{'MetabolicReaction'}
tre6p_c	C12H21O14P	-2	Metabolite	alpha,alpha'-Trehalose 6-phosphate	{}	{}	c	{'MetabolicReaction'}
trp__L_c	C11H12N2O2	0	Metabolite	L-Tryptophan	{}	{}	c	{'tRNAChargingReaction', 'MetabolicReaction', 'TranslationReaction'}
tsul_c	O3S2	-2	Metabolite	Thiosulfate	{}	{}	c	{'MetabolicReaction'}
ttdca_c	C14H27O2	-1	Metabolite	tetradecanoate (n-C14:0)	{}	{}	c	{'MetabolicReaction'}
ttdcap_c	C14H28O5P	-1	Metabolite	Tetradecanoyl-phosphate (n-C14:0)	{}	{}	c	{'MetabolicReaction'}
ttdcea_c	C14H25O2	-1	Metabolite	tetradecenoate (n-C14:1)	{}	{}	c	{'MetabolicReaction'}
ttdceap_c	C14H26O5P	-1	Metabolite	Tetradecanoyl-phosphate (n-C14:1)	{}	{}	c	{'MetabolicReaction'}
tungs_c	O4W1	-2	Metabolite	tungstate	{}	{}	c	{'MetabolicReaction'}
tyr__L_c	C9H11NO3	0	Metabolite	L-Tyrosine	{}	{}	c	{'tRNAChargingReaction', 'MetabolicReaction', 'TranslationReaction'}
u23ga_c	C43H75N3O20P2	-2	Metabolite	UDP-2,3-bis(3-hydroxytetradecanoyl)glucosamine	{}	{}	c	{'MetabolicReaction'}
u3aga_c	C31H51N3O19P2	-2	Metabolite	UDP-3-O-(3-hydroxytetradecanoyl)-N-acetylglucosamine	{}	{}	c	{'MetabolicReaction'}
u3hga_c	C29H50N3O18P2	-1	Metabolite	UDP-3-O-(3-hydroxytetradecanoyl)-D-glucosamine	{}	{}	c	{'MetabolicReaction'}
uLa4fn_c	C61H99N1O8P1	-1	Metabolite	undecaprenyl phosphate-4-amino-4-formyl-L-arabinose	{}	{}	c	{'MetabolicReaction'}
uLa4n_c	C60H100N1O7P1	0	Metabolite	undecaprenyl phosphate-4-amino-4-deoxy-L-arabinose	{}	{}	c	{'MetabolicReaction'}
uaagmda_c	C95H152N8O28P2	-4	Metabolite	Undecaprenyl-diphospho-N-acetylmuramoyl-(N-acetylglucosamine)-L-ala-D-glu-meso-2,6-diaminopimeloyl-D-ala-D-ala	{}	{}	c	{'MetabolicReaction'}
uaccg_c	C20H26N3O19P2	-3	Metabolite	UDP-N-acetyl-3-O-(1-carboxyvinyl)-D-glucosamine	{}	{}	c	{'MetabolicReaction'}
uacgam_c	C17H25N3O17P2	-2	Metabolite	UDP-N-acetyl-D-glucosamine	{}	{}	c	{'MetabolicReaction'}
uacmam_c	C17H25N3O17P2	-2	Metabolite	UDP-N-acetyl-D-mannosamine	{}	{}	c	{'MetabolicReaction'}
uacmamu_c	C17H22N3O18P2	-3	Metabolite	UDP-N-acetyl-D-mannosaminouronate	{}	{}	c	{'MetabolicReaction'}
uagmda_c	C87H139N7O23P2	-4	Metabolite	Undecaprenyl-diphospho-N-acetylmuramoyl-L-alanyl-D-glutamyl-meso-2,6-diaminopimeloyl-D-alanyl-D-alanine	{}	{}	c	{'MetabolicReaction'}
uama_c	C23H33N4O20P2	-3	Metabolite	UDP-N-acetylmuramoyl-L-alanine	{}	{}	c	{'MetabolicReaction'}
uamag_c	C28H39N5O23P2	-4	Metabolite	UDP-N-acetylmuramoyl-L-alanyl-D-glutamate	{}	{}	c	{'MetabolicReaction'}
uamr_c	C20H28N3O19P2	-3	Metabolite	UDP-N-acetylmuramate	{}	{}	c	{'MetabolicReaction'}
udcpdp_c	C55H89O7P2	-3	Metabolite	Undecaprenyl diphosphate	{}	{}	c	{'MetabolicReaction', 'SummaryVariable'}
udcpp_c	C55H89O4P	-2	Metabolite	Undecaprenyl phosphate	{}	{}	c	{'MetabolicReaction'}
udp_c	C9H11N2O12P2	-3	Metabolite	UDP	{}	{}	c	{'MetabolicReaction'}
udpLa4fn_c	C15H21N3O16P2	-2	Metabolite	uridine 5''-diphospho-{beta}-4-deoxy-4-formamido-L-arabinose	{}	{}	c	{'MetabolicReaction'}
udpLa4n_c	C14H22N3O15P2	-1	Metabolite	uridine 5''-diphospho-{beta}-4-deoxy-4-amino-L-arabinose	{}	{}	c	{'MetabolicReaction'}
udpLa4o_c	C14H18N2O16P2	-2	Metabolite	UDP-4-keto-pyranose	{}	{}	c	{'MetabolicReaction'}
udpg_c	C15H22N2O17P2	-2	Metabolite	UDPglucose	{}	{}	c	{'MetabolicReaction'}
udpgal_c	C15H22N2O17P2	-2	Metabolite	UDPgalactose	{}	{}	c	{'MetabolicReaction'}
udpgalfur_c	C15H22N2O17P2	-2	Metabolite	UDP-D-galacto-1,4-furanose	{}	{}	c	{'MetabolicReaction'}
udpglcur_c	C15H19N2O18P2	-3	Metabolite	UDP-D-glucuronate	{}	{}	c	{'MetabolicReaction'}
ugmd_c	C35H51N7O26P2	-4	Metabolite	UDP-N-acetylmuramoyl-L-alanyl-D-gamma-glutamyl-meso-2,6-diaminopimelate	{}	{}	c	{'MetabolicReaction'}
ugmda_c	C41H61N9O28P2	-4	Metabolite	UDP-N-acetylmuramoyl-L-alanyl-D-glutamyl-meso-2,6-diaminopimeloyl-D-alanyl-D-alanine	{}	{}	c	{'MetabolicReaction'}
um4p_c	C38H56N8O27P2	-4	Metabolite	UDP-N-acetylmuramoyl-L-alanyl-D-gamma-glutamyl-meso-2,6-diaminopimelate-D-alanine	{}	{}	c	{'MetabolicReaction'}
ump_c	C9H11N2O9P	-2	Metabolite	UMP	{}	{}	c	{'TranscriptionReaction', 'MetabolicReaction', 'TranslationReaction'}
unaga_c	C63H103NO12P2	-2	Metabolite	Undecaprenyl diphospho N-acetyl-glucosamine	{}	{}	c	{'MetabolicReaction'}
unagamu_c	C71H113N2O18P2	-3	Metabolite	Undecaprenyl-diphospho-N-acetylglucosamine-N-acetylmannosaminuronate	{}	{}	c	{'MetabolicReaction'}
unagamuf_c	C79H126N3O22P2	-3	Metabolite	Undecaprenyl-diphospho N-acetylglucosamine-N-acetylmannosaminuronate-N-acetamido-4,6-dideoxy-D-galactose	{}	{}	c	{'MetabolicReaction'}
uppg3_c	C40H36N4O16	-8	Metabolite	Uroporphyrinogen III	{}	{}	c	{'MetabolicReaction'}
ura_c	C4H4N2O2	0	Metabolite	Uracil	{}	{}	c	{'MetabolicReaction'}
uracp_c	C4H6N2O4	0	Metabolite	Ureidoacrylate peracid	{}	{}	c	{'MetabolicReaction'}
urate_c	C5H4N4O3	0	Metabolite	Urate	{}	{}	c	{'MetabolicReaction'}
urdglyc_c	C3H5N2O4	-1	Metabolite	(-)-Ureidoglycolate	{}	{}	c	{'MetabolicReaction'}
urea_c	CH4N2O	0	Metabolite	Urea	{}	{}	c	{'MetabolicReaction'}
uri_c	C9H12N2O6	0	Metabolite	Uridine	{}	{}	c	{'MetabolicReaction'}
utp_c	C9H11N2O15P3	-4	Metabolite	UTP	{}	{}	c	{'TranscriptionReaction', 'MetabolicReaction'}
val__L_c	C5H11NO2	0	Metabolite	L-Valine	{}	{}	c	{'tRNAChargingReaction', 'MetabolicReaction', 'TranslationReaction'}
xan_c	C5H4N4O2	0	Metabolite	Xanthine	{}	{}	c	{'MetabolicReaction'}
xdp_c	C10H11N4O12P2	-3	Metabolite	XDP	{}	{}	c	{'MetabolicReaction'}
xmp_c	C10H11N4O9P	-2	Metabolite	Xanthosine 5'-phosphate	{}	{}	c	{'MetabolicReaction'}
xtp_c	C10H11N4O15P3	-4	Metabolite	XTP	{}	{}	c	{'MetabolicReaction'}
xtsn_c	C10H12N4O6	0	Metabolite	Xanthosine	{}	{}	c	{'MetabolicReaction'}
xu5p__D_c	C5H9O8P	-2	Metabolite	D-Xylulose 5-phosphate	{}	{}	c	{'MetabolicReaction'}
xu5p__L_c	C5H9O8P	-2	Metabolite	L-Xylulose 5-phosphate	{}	{}	c	{'MetabolicReaction'}
xyl__D_c	C5H10O5	0	Metabolite	D-Xylose	{}	{}	c	{'MetabolicReaction'}
xylu__D_c	C5H10O5	0	Metabolite	D-Xylulose	{}	{}	c	{'MetabolicReaction'}
xylu__L_c	C5H10O5	0	Metabolite	L-Xylulose	{}	{}	c	{'MetabolicReaction'}
zn2_c	Zn	2	Metabolite	Zinc	{}	{}	c	{'ComplexFormation', 'MetabolicReaction'}
12ppd__R_e	C3H8O2	0	Metabolite	(R)-Propane-1,2-diol	{}	{}	e	{'MetabolicReaction', 'MEReaction'}
12ppd__S_e	C3H8O2	0	Metabolite	(S)-Propane-1,2-diol	{}	{}	e	{'MetabolicReaction', 'MEReaction'}
14glucan_e	C36H62O31	0	Metabolite	1,4-alpha-D-glucan	{}	{}	e	{'MetabolicReaction', 'MEReaction'}
15dap_e	C5H16N2	2	Metabolite	1,5-Diaminopentane	{}	{}	e	{'MetabolicReaction', 'MEReaction'}
23camp_e	C10H11N5O6P	-1	Metabolite	2',3'-Cyclic AMP	{}	{}	e	{'MetabolicReaction', 'MEReaction'}
23ccmp_e	C9H11N3O7P	-1	Metabolite	2',3'-Cyclic CMP	{}	{}	e	{'MetabolicReaction', 'MEReaction'}
23cgmp_e	C10H11N5O7P	-1	Metabolite	2',3'-Cyclic GMP	{}	{}	e	{'MetabolicReaction', 'MEReaction'}
23cump_e	C9H10N2O8P	-1	Metabolite	2',3'-Cyclic UMP	{}	{}	e	{'MetabolicReaction', 'MEReaction'}
23dappa_e	C3H9N2O2	1	Metabolite	2,3-diaminopropionate	{}	{}	e	{'MetabolicReaction', 'MEReaction'}
26dap__M_e	C7H14N2O4	0	Metabolite	meso-2,6-Diaminoheptanedioate	{}	{}	e	{'MetabolicReaction', 'MEReaction'}
2ddglcn_e	C6H9O6	-1	Metabolite	2-Dehydro-3-deoxy-D-gluconate	{}	{}	e	{'MetabolicReaction', 'MEReaction'}
34dhpac_e	C8H8O3	0	Metabolite	3,4-Dihydroxyphenylacetaldehyde	{}	{}	e	{'MetabolicReaction', 'MEReaction'}
3amp_e	C10H12N5O7P	-2	Metabolite	3'-AMP	{}	{}	e	{'MetabolicReaction', 'MEReaction'}
3cmp_e	C9H12N3O8P	-2	Metabolite	3'-cmp	{}	{}	e	{'MetabolicReaction', 'MEReaction'}
3gmp_e	C10H12N5O8P	-2	Metabolite	3'-GMP	{}	{}	e	{'MetabolicReaction', 'MEReaction'}
3hcinnm_e	C9H7O3	-1	Metabolite	3-hydroxycinnamic acid	{}	{}	e	{'MetabolicReaction', 'MEReaction'}
3hpp_e	C3H5O3	-1	Metabolite	3-Hydroxypropanoate	{}	{}	e	{'MetabolicReaction', 'MEReaction'}
3hpppn_e	C9H9O3	-1	Metabolite	3-(3-hydroxy-phenyl)propionate	{}	{}	e	{'MetabolicReaction', 'MEReaction'}
3ump_e	C9H11N2O9P	-2	Metabolite	3'-UMP	{}	{}	e	{'MetabolicReaction', 'MEReaction'}
4abut_e	C4H9NO2	0	Metabolite	4-Aminobutanoate	{}	{}	e	{'MetabolicReaction', 'MEReaction'}
4hoxpacd_e	C8H8O2	0	Metabolite	4-Hydroxyphenylacetaldehyde	{}	{}	e	{'MetabolicReaction', 'MEReaction'}
5dglcn_e	C6H9O7	-1	Metabolite	5-Dehydro-D-gluconate	{}	{}	e	{'MetabolicReaction', 'MEReaction'}
5mtr_e	C6H12O4S	0	Metabolite	5-Methylthio-D-ribose	{}	{}	e	{'MetabolicReaction', 'MEReaction'}
LalaDglu_e	C8H13N2O5	-1	Metabolite	L-alanine-D-glutamate	{}	{}	e	{'MetabolicReaction', 'MEReaction'}
LalaDgluMdap_e	C15H25N4O8	-1	Metabolite	L-alanine-D-glutamate-meso-2,6-diaminoheptanedioate	{}	{}	e	{'MetabolicReaction', 'MEReaction'}
LalaDgluMdapDala_e	C18H30N5O9	-1	Metabolite	L-alanine-D-glutamate-meso-2,6-diaminoheptanedioate-D-alanine	{}	{}	e	{'MetabolicReaction', 'MEReaction'}
LalaLglu_e	C8H13N2O5	-1	Metabolite	L-alanine-L-glutamate	{}	{}	e	{'MetabolicReaction', 'MEReaction'}
ac_e	C2H3O2	-1	Metabolite	Acetate	{}	{}	e	{'MetabolicReaction', 'MEReaction'}
acac_e	C4H5O3	-1	Metabolite	Acetoacetate	{}	{}	e	{'MetabolicReaction', 'MEReaction'}
acald_e	C2H4O	0	Metabolite	Acetaldehyde	{}	{}	e	{'MetabolicReaction', 'MEReaction'}
acgal_e	C8H15NO6	0	Metabolite	N-Acetyl-D-galactosamine	{}	{}	e	{'MetabolicReaction', 'MEReaction'}
acgal1p_e	C8H14NO9P	-2	Metabolite	N-Acetyl-D-galactosamine 1-phosphate	{}	{}	e	{'MetabolicReaction', 'MEReaction'}
acgam_e	C8H15NO6	0	Metabolite	N-Acetyl-D-glucosamine	{}	{}	e	{'MetabolicReaction', 'MEReaction'}
acgam1p_e	C8H14NO9P	-2	Metabolite	N-Acetyl-D-glucosamine 1-phosphate	{}	{}	e	{'MetabolicReaction', 'MEReaction'}
acmana_e	C8H15NO6	0	Metabolite	N-Acetyl-D-mannosamine	{}	{}	e	{'MetabolicReaction', 'MEReaction'}
acmum_e	C11H18NO8	-1	Metabolite	N-Acetylmuramate	{}	{}	e	{'MetabolicReaction', 'MEReaction'}
acnam_e	C11H18NO9	-1	Metabolite	N-Acetylneuraminate	{}	{}	e	{'MetabolicReaction', 'MEReaction'}
acolipa_e	C181H314N3O103P4	-9	Metabolite	4-Amino-4-deoxy-L-arabinose modified core oligosaccharide lipid A	{}	{}	e	{'MetabolicReaction', 'MEReaction'}
acser_e	C5H9NO4	0	Metabolite	O-Acetyl-L-serine	{}	{}	e	{'MetabolicReaction', 'MEReaction'}
ade_e	C5H5N5	0	Metabolite	Adenine	{}	{}	e	{'MetabolicReaction', 'MEReaction'}
adn_e	C10H13N5O4	0	Metabolite	Adenosine	{}	{}	e	{'MetabolicReaction', 'MEReaction'}
adocbl_e	C72H100CoN18O17P	0	Metabolite	Adenosylcobalamin	{}	{}	e	{'MetabolicReaction', 'MEReaction'}
ag_e	Ag	1	Metabolite	silver	{}	{}	e	{'MetabolicReaction', 'MEReaction'}
agm_e	C5H16N4	2	Metabolite	Agmatine	{}	{}	e	{'MetabolicReaction', 'MEReaction'}
akg_e	C5H4O5	-2	Metabolite	2-Oxoglutarate	{}	{}	e	{'MetabolicReaction', 'MEReaction'}
ala__B_e	C3H7NO2	0	Metabolite	beta-Alanine	{}	{}	e	{'MetabolicReaction', 'MEReaction'}
ala__D_e	C3H7NO2	0	Metabolite	D-Alanine	{}	{}	e	{'MetabolicReaction', 'MEReaction'}
ala__L_e	C3H7NO2	0	Metabolite	L-Alanine	{}	{}	e	{'MetabolicReaction', 'MEReaction'}
alaala_e	C6H12N2O3	0	Metabolite	D-Alanyl-D-alanine	{}	{}	e	{'MetabolicReaction', 'MEReaction'}
all__D_e	C6H12O6	0	Metabolite	D-Allose	{}	{}	e	{'MetabolicReaction', 'MEReaction'}
alltn_e	C4H6N4O3	0	Metabolite	Allantoin	{}	{}	e	{'MetabolicReaction', 'MEReaction'}
amp_e	C10H12N5O7P	-2	Metabolite	AMP	{}	{}	e	{'MetabolicReaction', 'MEReaction'}
anhgm_e	C19H29N2O12	-1	Metabolite	N-Acetyl-D-glucosamine(anhydrous)N-Acetylmuramic acid	{}	{}	e	{'MetabolicReaction', 'MEReaction'}
arab__L_e	C5H10O5	0	Metabolite	L-Arabinose	{}	{}	e	{'MetabolicReaction', 'MEReaction'}
arbt_e	C12H16O7	0	Metabolite	Arbutin	{}	{}	e	{'MetabolicReaction', 'MEReaction'}
arbtn_e	C22H33N4O13	-3	Metabolite	aerobactin minus Fe3	{}	{}	e	{'MetabolicReaction', 'MEReaction'}
arbtn__fe3_e	C22H33FeN4O13	0	Metabolite	Aerobactin	{}	{}	e	{'MetabolicReaction', 'MEReaction'}
arg__L_e	C6H15N4O2	1	Metabolite	L-Arginine	{}	{}	e	{'MetabolicReaction', 'MEReaction'}
ascb__L_e	C6H8O6	0	Metabolite	L-Ascorbate	{}	{}	e	{'MetabolicReaction', 'MEReaction'}
asn__L_e	C4H8N2O3	0	Metabolite	L-Asparagine	{}	{}	e	{'MetabolicReaction', 'MEReaction'}
aso3_e	AsO3	-3	Metabolite	arsenite	{}	{}	e	{'MetabolicReaction', 'MEReaction'}
asp__L_e	C4H6NO4	-1	Metabolite	L-Aspartate	{}	{}	e	{'MetabolicReaction', 'MEReaction'}
btn_e	C10H15N2O3S	-1	Metabolite	Biotin	{}	{}	e	{'MetabolicReaction', 'MEReaction'}
but_e	C4H7O2	-1	Metabolite	Butyrate (n-C4:0)	{}	{}	e	{'MetabolicReaction', 'MEReaction'}
butso3_e	C4H9O3S	-1	Metabolite	butanesulfonate	{}	{}	e	{'MetabolicReaction', 'MEReaction'}
ca2_e	Ca	2	Metabolite	Calcium	{}	{}	e	{'MetabolicReaction', 'MEReaction'}
cbi_e	C48H72CoN11O8	0	Metabolite	Cobinamide	{}	{}	e	{'MetabolicReaction', 'MEReaction'}
cbl1_e	C62H88CoN13O14P	-1	Metabolite	Cob(I)alamin	{}	{}	e	{'MetabolicReaction', 'MEReaction'}
cd2_e	Cd	2	Metabolite	Cadmium	{}	{}	e	{'MetabolicReaction', 'MEReaction'}
cgly_e	C5H10N2O3S	0	Metabolite	Cys-Gly	{}	{}	e	{'MetabolicReaction', 'MEReaction'}
chol_e	C5H14NO	1	Metabolite	Choline	{}	{}	e	{'MetabolicReaction', 'MEReaction'}
chtbs_e	C16H28N2O11	0	Metabolite	N,N'-diacetylchitobiose	{}	{}	e	{'MetabolicReaction', 'MEReaction'}
cit_e	C6H5O7	-3	Metabolite	Citrate	{}	{}	e	{'MetabolicReaction', 'MEReaction'}
cl_e	Cl	-1	Metabolite	Chloride	{}	{}	e	{'MetabolicReaction', 'MEReaction'}
cm_e	C11H12Cl2N2O5	0	Metabolite	Chloramphenicol	{}	{}	e	{'MetabolicReaction', 'MEReaction'}
cmp_e	C9H12N3O8P	-2	Metabolite	CMP	{}	{}	e	{'MetabolicReaction', 'MEReaction'}
co2_e	CO2	0	Metabolite	CO2	{}	{}	e	{'MetabolicReaction', 'MEReaction'}
cobalt2_e	Co	2	Metabolite	Co2+	{}	{}	e	{'MetabolicReaction', 'MEReaction'}
colipa_e	C176H303N2O100P4	-11	Metabolite	core oligosaccharide lipid A	{}	{}	e	{'MetabolicReaction', 'MEReaction'}
colipap_e	C176H303N2O103P5	-12	Metabolite	core oligosaccharide lipid A diphosphate	{}	{}	e	{'MetabolicReaction', 'MEReaction'}
cpgn_e	C35H52N6O13Fe	-1	Metabolite	coprogen	{}	{}	e	{'MetabolicReaction', 'MEReaction'}
cpgn__un_e	C35H52N6O13	-4	Metabolite	coprogen unloaded (no Fe(III))	{}	{}	e	{'MetabolicReaction', 'MEReaction'}
crn_e	C7H15NO3	0	Metabolite	L-Carnitine	{}	{}	e	{'MetabolicReaction', 'MEReaction'}
crn__D_e	C7H15NO3	0	Metabolite	D-Carnitine	{}	{}	e	{'MetabolicReaction', 'MEReaction'}
csn_e	C4H5N3O	0	Metabolite	Cytosine	{}	{}	e	{'MetabolicReaction', 'MEReaction'}
cu_e	Cu	1	Metabolite	Cu+	{}	{}	e	{'MetabolicReaction', 'MEReaction'}
cu2_e	Cu	2	Metabolite	Cu2+	{}	{}	e	{'MetabolicReaction', 'MEReaction'}
cyan_e	CHN	0	Metabolite	Hydrogen cyanide	{}	{}	e	{'MetabolicReaction', 'MEReaction'}
cynt_e	CNO	-1	Metabolite	Cyanate	{}	{}	e	{'MetabolicReaction', 'MEReaction'}
cys__D_e	C3H7NO2S	0	Metabolite	D-Cysteine	{}	{}	e	{'MetabolicReaction', 'MEReaction'}
cys__L_e	C3H7NO2S	0	Metabolite	L-Cysteine	{}	{}	e	{'MetabolicReaction', 'MEReaction'}
cytd_e	C9H13N3O5	0	Metabolite	Cytidine	{}	{}	e	{'MetabolicReaction', 'MEReaction'}
dad__2_e	C10H13N5O3	0	Metabolite	Deoxyadenosine	{}	{}	e	{'MetabolicReaction', 'MEReaction'}
damp_e	C10H12N5O6P	-2	Metabolite	dAMP	{}	{}	e	{'MetabolicReaction', 'MEReaction'}
dca_e	C10H19O2	-1	Metabolite	Decanoate (n-C10:0)	{}	{}	e	{'MetabolicReaction', 'MEReaction'}
dcmp_e	C9H12N3O7P	-2	Metabolite	dCMP	{}	{}	e	{'MetabolicReaction', 'MEReaction'}
dcyt_e	C9H13N3O4	0	Metabolite	Deoxycytidine	{}	{}	e	{'MetabolicReaction', 'MEReaction'}
ddca_e	C12H23O2	-1	Metabolite	Dodecanoate (n-C12:0)	{}	{}	e	{'MetabolicReaction', 'MEReaction'}
dgmp_e	C10H12N5O7P	-2	Metabolite	dGMP	{}	{}	e	{'MetabolicReaction', 'MEReaction'}
dgsn_e	C10H13N5O4	0	Metabolite	Deoxyguanosine	{}	{}	e	{'MetabolicReaction', 'MEReaction'}
dha_e	C3H6O3	0	Metabolite	Dihydroxyacetone	{}	{}	e	{'MetabolicReaction', 'MEReaction'}
dimp_e	C10H11N4O7P	-2	Metabolite	dIMP	{}	{}	e	{'MetabolicReaction', 'MEReaction'}
din_e	C10H12N4O4	0	Metabolite	Deoxyinosine	{}	{}	e	{'MetabolicReaction', 'MEReaction'}
dms_e	C2H6S	0	Metabolite	Dimethyl sulfide	{}	{}	e	{'MetabolicReaction', 'MEReaction'}
dmso_e	C2H6OS	0	Metabolite	Dimethyl sulfoxide	{}	{}	e	{'MetabolicReaction', 'MEReaction'}
dopa_e	C8H12NO2	1	Metabolite	Dopamine	{}	{}	e	{'MetabolicReaction', 'MEReaction'}
doxrbcn_e	C27H29NO11	0	Metabolite	doxorubicin	{}	{}	e	{'MetabolicReaction', 'MEReaction'}
dtmp_e	C10H13N2O8P	-2	Metabolite	dTMP	{}	{}	e	{'MetabolicReaction', 'MEReaction'}
dump_e	C9H11N2O8P	-2	Metabolite	dUMP	{}	{}	e	{'MetabolicReaction', 'MEReaction'}
duri_e	C9H12N2O5	0	Metabolite	Deoxyuridine	{}	{}	e	{'MetabolicReaction', 'MEReaction'}
eca4colipa_e	C272H447N14O160P4	-15	Metabolite	(enterobacterial common antigen)x4 core oligosaccharide lipid A	{}	{}	e	{'MetabolicReaction', 'MEReaction'}
enlipa_e	C112H202N3O42P3	-6	Metabolite	phosphoethanolamine KDO(2)-lipid (A)	{}	{}	e	{'MetabolicReaction', 'MEReaction'}
enter_e	C30H27N3O15	0	Metabolite	Enterochelin	{}	{}	e	{'MetabolicReaction', 'MEReaction'}
etha_e	C2H8NO	1	Metabolite	Ethanolamine	{}	{}	e	{'MetabolicReaction', 'MEReaction'}
ethso3_e	C2H5O3S	-1	Metabolite	ethanesulfonate	{}	{}	e	{'MetabolicReaction', 'MEReaction'}
etoh_e	C2H6O	0	Metabolite	Ethanol	{}	{}	e	{'MetabolicReaction', 'MEReaction'}
f6p_e	C6H11O9P	-2	Metabolite	D-Fructose 6-phosphate	{}	{}	e	{'MetabolicReaction', 'MEReaction'}
fald_e	CH2O	0	Metabolite	Formaldehyde	{}	{}	e	{'MetabolicReaction', 'MEReaction'}
fe2_e	Fe	2	Metabolite	Fe2+	{}	{}	e	{'MetabolicReaction', 'MEReaction'}
fe3_e	Fe	3	Metabolite	Fe3+	{}	{}	e	{'MetabolicReaction', 'MEReaction'}
fe3dcit_e	C12H10FeO14	-3	Metabolite	Fe(III)dicitrate	{}	{}	e	{'MetabolicReaction', 'MEReaction'}
fe3dhbzs_e	C10H10NO6Fe	2	Metabolite	ferric 2,3-dihydroxybenzoylserine	{}	{}	e	{'MetabolicReaction', 'MEReaction'}
fe3hox_e	C9H18O6N3Fe	0	Metabolite	Fe(III)hydroxamate	{}	{}	e	{'MetabolicReaction', 'MEReaction'}
fe3hox__un_e	C9H18O6N3	-3	Metabolite	Fe(III)hydoxamate, unloaded	{}	{}	e	{'MetabolicReaction', 'MEReaction'}
fecrm_e	C27H42FeN9O12	0	Metabolite	Ferrichrome	{}	{}	e	{'MetabolicReaction', 'MEReaction'}
fecrm__un_e	C27H42N9O12	-3	Metabolite	Ferrichrome minus Fe(III)	{}	{}	e	{'MetabolicReaction', 'MEReaction'}
feenter_e	C30H27FeN3O15	3	Metabolite	Fe-enterobactin	{}	{}	e	{'MetabolicReaction', 'MEReaction'}
feoxam_e	C25H46FeN6O8	1	Metabolite	ferroxamine	{}	{}	e	{'MetabolicReaction', 'MEReaction'}
feoxam__un_e	C25H46N6O8	-2	Metabolite	ferroxamine minus Fe(3)	{}	{}	e	{'MetabolicReaction', 'MEReaction'}
for_e	CH1O2	-1	Metabolite	Formate	{}	{}	e	{'MetabolicReaction', 'MEReaction'}
fru_e	C6H12O6	0	Metabolite	D-Fructose	{}	{}	e	{'MetabolicReaction', 'MEReaction'}
frulys_e	C12H25N2O7	1	Metabolite	fructoselysine	{}	{}	e	{'MetabolicReaction', 'MEReaction'}
fruur_e	C6H9O7	-1	Metabolite	D-Fructuronate	{}	{}	e	{'MetabolicReaction', 'MEReaction'}
fuc__L_e	C6H12O5	0	Metabolite	L-Fucose	{}	{}	e	{'MetabolicReaction', 'MEReaction'}
fum_e	C4H2O4	-2	Metabolite	Fumarate	{}	{}	e	{'MetabolicReaction', 'MEReaction'}
fusa_e	C31H48O5	0	Metabolite	fusidic acid	{}	{}	e	{'MetabolicReaction', 'MEReaction'}
g1p_e	C6H11O9P	-2	Metabolite	D-Glucose 1-phosphate	{}	{}	e	{'MetabolicReaction', 'MEReaction'}
g3pc_e	C8H20NO6P	0	Metabolite	sn-Glycero-3-phosphocholine	{}	{}	e	{'MetabolicReaction', 'MEReaction'}
g3pe_e	C5H14NO6P	0	Metabolite	sn-Glycero-3-phosphoethanolamine	{}	{}	e	{'MetabolicReaction', 'MEReaction'}
g3pg_e	C6H14O8P	-1	Metabolite	Glycerophosphoglycerol	{}	{}	e	{'MetabolicReaction', 'MEReaction'}
g3pi_e	C9H18O11P	-1	Metabolite	sn-Glycero-3-phospho-1-inositol	{}	{}	e	{'MetabolicReaction', 'MEReaction'}
g3ps_e	C6H13NO8P	-1	Metabolite	Glycerophosphoserine	{}	{}	e	{'MetabolicReaction', 'MEReaction'}
g6p_e	C6H11O9P	-2	Metabolite	D-Glucose 6-phosphate	{}	{}	e	{'MetabolicReaction', 'MEReaction'}
gal_e	C6H12O6	0	Metabolite	D-Galactose	{}	{}	e	{'MetabolicReaction', 'MEReaction'}
gal__bD_e	C6H12O6	0	Metabolite	beta D-Galactose	{}	{}	e	{'MetabolicReaction', 'MEReaction'}
gal1p_e	C6H11O9P	-2	Metabolite	alpha-D-Galactose 1-phosphate	{}	{}	e	{'MetabolicReaction', 'MEReaction'}
galct__D_e	C6H8O8	-2	Metabolite	D-Galactarate	{}	{}	e	{'MetabolicReaction', 'MEReaction'}
galctn__D_e	C6H11O7	-1	Metabolite	D-Galactonate	{}	{}	e	{'MetabolicReaction', 'MEReaction'}
galctn__L_e	C6H11O7	-1	Metabolite	L-Galactonate	{}	{}	e	{'MetabolicReaction', 'MEReaction'}
galt_e	C6H14O6	0	Metabolite	Galactitol	{}	{}	e	{'MetabolicReaction', 'MEReaction'}
galur_e	C6H9O7	-1	Metabolite	D-Galacturonate	{}	{}	e	{'MetabolicReaction', 'MEReaction'}
gam_e	C6H14NO5	1	Metabolite	D-Glucosamine	{}	{}	e	{'MetabolicReaction', 'MEReaction'}
gam6p_e	C6H13NO8P	-1	Metabolite	D-Glucosamine 6-phosphate	{}	{}	e	{'MetabolicReaction', 'MEReaction'}
gbbtn_e	C7H15NO2	0	Metabolite	gamma-butyrobetaine	{}	{}	e	{'MetabolicReaction', 'MEReaction'}
gdp_e	C10H12N5O11P2	-3	Metabolite	GDP	{}	{}	e	{'MetabolicReaction', 'MEReaction'}
glc__D_e	C6H12O6	0	Metabolite	D-Glucose	{}	{}	e	{'MetabolicReaction', 'MEReaction'}
glcn_e	C6H11O7	-1	Metabolite	D-Gluconate	{}	{}	e	{'MetabolicReaction', 'MEReaction'}
glcr_e	C6H8O8	-2	Metabolite	D-Glucarate	{}	{}	e	{'MetabolicReaction', 'MEReaction'}
glcur_e	C6H9O7	-1	Metabolite	D-Glucuronate	{}	{}	e	{'MetabolicReaction', 'MEReaction'}
glcur1p_e	C6H8O10P	-3	Metabolite	D-Glucuronate 1-phosphate	{}	{}	e	{'MetabolicReaction', 'MEReaction'}
gln__L_e	C5H10N2O3	0	Metabolite	L-Glutamine	{}	{}	e	{'MetabolicReaction', 'MEReaction'}
glu__L_e	C5H8NO4	-1	Metabolite	L-Glutamate	{}	{}	e	{'MetabolicReaction', 'MEReaction'}
gly_e	C2H5NO2	0	Metabolite	Glycine	{}	{}	e	{'MetabolicReaction', 'MEReaction'}
glyald_e	C3H6O3	0	Metabolite	D-Glyceraldehyde	{}	{}	e	{'MetabolicReaction', 'MEReaction'}
glyb_e	C5H11NO2	0	Metabolite	Glycine betaine	{}	{}	e	{'MetabolicReaction', 'MEReaction'}
glyc_e	C3H8O3	0	Metabolite	Glycerol	{}	{}	e	{'MetabolicReaction', 'MEReaction'}
glyc__R_e	C3H5O4	-1	Metabolite	(R)-Glycerate	{}	{}	e	{'MetabolicReaction', 'MEReaction'}
glyc2p_e	C3H7O6P	-2	Metabolite	Glycerol 2-phosphate	{}	{}	e	{'MetabolicReaction', 'MEReaction'}
glyc3p_e	C3H7O6P	-2	Metabolite	Glycerol 3-phosphate	{}	{}	e	{'MetabolicReaction', 'MEReaction'}
glyclt_e	C2H3O3	-1	Metabolite	Glycolate	{}	{}	e	{'MetabolicReaction', 'MEReaction'}
gmp_e	C10H12N5O8P	-2	Metabolite	GMP	{}	{}	e	{'MetabolicReaction', 'MEReaction'}
gsn_e	C10H13N5O5	0	Metabolite	Guanosine	{}	{}	e	{'MetabolicReaction', 'MEReaction'}
gthox_e	C20H30N6O12S2	-2	Metabolite	Oxidized glutathione	{}	{}	e	{'MetabolicReaction', 'MEReaction'}
gthrd_e	C10H16N3O6S	-1	Metabolite	Reduced glutathione	{}	{}	e	{'MetabolicReaction', 'MEReaction'}
gtp_e	C10H12N5O14P3	-4	Metabolite	GTP	{}	{}	e	{'MetabolicReaction', 'MEReaction'}
gua_e	C5H5N5O	0	Metabolite	Guanine	{}	{}	e	{'MetabolicReaction', 'MEReaction'}
h_e	H	1	Metabolite	H+	{}	{}	e	{'MetabolicReaction', 'MEReaction'}
h2_e	H2	0	Metabolite	H2	{}	{}	e	{'MetabolicReaction', 'MEReaction'}
h2o_e	H2O	0	Metabolite	H2O	{}	{}	e	{'MetabolicReaction', 'MEReaction'}
h2o2_e	H2O2	0	Metabolite	Hydrogen peroxide	{}	{}	e	{'MetabolicReaction', 'MEReaction'}
h2s_e	H2S	0	Metabolite	Hydrogen sulfide	{}	{}	e	{'MetabolicReaction', 'MEReaction'}
hacolipa_e	C192H333N2O101P4	-11	Metabolite	hepta-acylated core oligosaccharide lipid A (E. coli)	{}	{}	e	{'MetabolicReaction', 'MEReaction'}
halipa_e	C126H226N2O40P2	-6	Metabolite	hepta-acylated KDO(2)-lipid (A)	{}	{}	e	{'MetabolicReaction', 'MEReaction'}
hdca_e	C16H31O2	-1	Metabolite	Hexadecanoate (n-C16:0)	{}	{}	e	{'MetabolicReaction', 'MEReaction'}
hdcea_e	C16H29O2	-1	Metabolite	Hexadecenoate (n-C16:1)	{}	{}	e	{'MetabolicReaction', 'MEReaction'}
hg2_e	Hg	2	Metabolite	Hg2+	{}	{}	e	{'MetabolicReaction', 'MEReaction'}
his__L_e	C6H9N3O2	0	Metabolite	L-Histidine	{}	{}	e	{'MetabolicReaction', 'MEReaction'}
hom__L_e	C4H9NO3	0	Metabolite	L-Homoserine	{}	{}	e	{'MetabolicReaction', 'MEReaction'}
hxa_e	C6H11O2	-1	Metabolite	Hexanoate (n-C6:0)	{}	{}	e	{'MetabolicReaction', 'MEReaction'}
hxan_e	C5H4N4O	0	Metabolite	Hypoxanthine	{}	{}	e	{'MetabolicReaction', 'MEReaction'}
idon__L_e	C6H11O7	-1	Metabolite	L-Idonate	{}	{}	e	{'MetabolicReaction', 'MEReaction'}
ile__L_e	C6H13NO2	0	Metabolite	L-Isoleucine	{}	{}	e	{'MetabolicReaction', 'MEReaction'}
imp_e	C10H11N4O8P	-2	Metabolite	IMP	{}	{}	e	{'MetabolicReaction', 'MEReaction'}
indole_e	C8H7N	0	Metabolite	Indole	{}	{}	e	{'MetabolicReaction', 'MEReaction'}
inost_e	C6H12O6	0	Metabolite	myo-Inositol	{}	{}	e	{'MetabolicReaction', 'MEReaction'}
ins_e	C10H12N4O5	0	Metabolite	Inosine	{}	{}	e	{'MetabolicReaction', 'MEReaction'}
isetac_e	C2H5O4S	-1	Metabolite	Isethionic acid	{}	{}	e	{'MetabolicReaction', 'MEReaction'}
k_e	K	1	Metabolite	potassium	{}	{}	e	{'MetabolicReaction', 'MEReaction'}
kdo2lipid4_e	C84H148N2O37P2	-6	Metabolite	KDO(2)-lipid IV(A)	{}	{}	e	{'MetabolicReaction', 'SummaryVariable', 'MEReaction'}
lac__D_e	C3H5O3	-1	Metabolite	D-Lactate	{}	{}	e	{'MetabolicReaction', 'MEReaction'}
lac__L_e	C3H5O3	-1	Metabolite	L-Lactate	{}	{}	e	{'MetabolicReaction', 'MEReaction'}
lcts_e	C12H22O11	0	Metabolite	Lactose	{}	{}	e	{'MetabolicReaction', 'MEReaction'}
leu__L_e	C6H13NO2	0	Metabolite	L-Leucine	{}	{}	e	{'MetabolicReaction', 'MEReaction'}
lipa_e	C110H196N2O39P2	-6	Metabolite	KDO(2)-lipid (A)	{}	{}	e	{'MetabolicReaction', 'MEReaction'}
lipa_cold_e	C114H202N2O39P2	-6	Metabolite	cold adapted KDO(2)-lipid (A)	{}	{}	e	{'MetabolicReaction', 'MEReaction'}
lipoate_e	C8H14O2S2	0	Metabolite	Lipoate	{}	{}	e	{'MetabolicReaction', 'MEReaction'}
lys__L_e	C6H15N2O2	1	Metabolite	L-Lysine	{}	{}	e	{'MetabolicReaction', 'MEReaction'}
lyx__L_e	C5H10O5	0	Metabolite	L-Lyxose	{}	{}	e	{'MetabolicReaction', 'MEReaction'}
mal__D_e	C4H4O5	-2	Metabolite	D-Malate	{}	{}	e	{'MetabolicReaction', 'MEReaction'}
mal__L_e	C4H4O5	-2	Metabolite	L-Malate	{}	{}	e	{'MetabolicReaction', 'MEReaction'}
malt_e	C12H22O11	0	Metabolite	Maltose	{}	{}	e	{'MetabolicReaction', 'MEReaction'}
malthx_e	C36H62O31	0	Metabolite	Maltohexaose	{}	{}	e	{'MetabolicReaction', 'MEReaction'}
maltpt_e	C30H52O26	0	Metabolite	Maltopentaose	{}	{}	e	{'MetabolicReaction', 'MEReaction'}
malttr_e	C18H32O16	0	Metabolite	Maltotriose	{}	{}	e	{'MetabolicReaction', 'MEReaction'}
maltttr_e	C24H42O21	0	Metabolite	Maltotetraose	{}	{}	e	{'MetabolicReaction', 'MEReaction'}
man_e	C6H12O6	0	Metabolite	D-Mannose	{}	{}	e	{'MetabolicReaction', 'MEReaction'}
man6p_e	C6H11O9P	-2	Metabolite	D-Mannose 6-phosphate	{}	{}	e	{'MetabolicReaction', 'MEReaction'}
manglyc_e	C9H15O9	-1	Metabolite	2(alpha-D-Mannosyl)-D-glycerate	{}	{}	e	{'MetabolicReaction', 'MEReaction'}
melib_e	C12H22O11	0	Metabolite	Melibiose	{}	{}	e	{'MetabolicReaction', 'MEReaction'}
meoh_e	CH4O1	0	Metabolite	Methanol	{}	{}	e	{'MetabolicReaction', 'MEReaction'}
met__D_e	C5H10NO2S	0	Metabolite	D-Methionine	{}	{}	e	{'MetabolicReaction', 'MEReaction'}
met__L_e	C5H11NO2S	0	Metabolite	L-Methionine	{}	{}	e	{'MetabolicReaction', 'MEReaction'}
metsox__R__L_e	C5H11NO3S	0	Metabolite	L-methionine-R-sulfoxide	{}	{}	e	{'MetabolicReaction', 'MEReaction'}
metsox__S__L_e	C5H11NO3S	0	Metabolite	L-Methionine Sulfoxide	{}	{}	e	{'MetabolicReaction', 'MEReaction'}
mg2_e	Mg	2	Metabolite	magnesium	{}	{}	e	{'MetabolicReaction', 'MEReaction'}
mincyc_e	C23H27N3O7	0	Metabolite	minocycline	{}	{}	e	{'MetabolicReaction', 'MEReaction'}
minohp_e	C6H6O24P6	-12	Metabolite	myo-Inositol hexakisphosphate	{}	{}	e	{'MetabolicReaction', 'MEReaction'}
mmet_e	C6H14NO2S	1	Metabolite	S-Methyl-L-methionine	{}	{}	e	{'MetabolicReaction', 'MEReaction'}
mn2_e	Mn	2	Metabolite	Mn2+	{}	{}	e	{'MetabolicReaction', 'MEReaction'}
mnl_e	C6H14O6	0	Metabolite	D-Mannitol	{}	{}	e	{'MetabolicReaction', 'MEReaction'}
mobd_e	MoO4	-2	Metabolite	Molybdate	{}	{}	e	{'MetabolicReaction', 'MEReaction'}
mso3_e	CH3O3S	-1	Metabolite	methanesulfonate	{}	{}	e	{'MetabolicReaction', 'MEReaction'}
n2o_e	N2O	0	Metabolite	Nitrous oxide	{}	{}	e	{'MetabolicReaction', 'MEReaction'}
na1_e	Na	1	Metabolite	Sodium	{}	{}	e	{'MetabolicReaction', 'MEReaction'}
nac_e	C6H4NO2	-1	Metabolite	Nicotinate	{}	{}	e	{'MetabolicReaction', 'MEReaction'}
nh4_e	H4N	1	Metabolite	Ammonium	{}	{}	e	{'MetabolicReaction', 'MEReaction'}
ni2_e	Ni	2	Metabolite	nickel	{}	{}	e	{'MetabolicReaction', 'MEReaction'}
nmn_e	C11H14N2O8P	-1	Metabolite	NMN	{}	{}	e	{'MetabolicReaction', 'MEReaction'}
no_e	NO	0	Metabolite	Nitric oxide	{}	{}	e	{'MetabolicReaction', 'MEReaction'}
no2_e	NO2	-1	Metabolite	Nitrite	{}	{}	e	{'MetabolicReaction', 'MEReaction'}
no3_e	NO3	-1	Metabolite	Nitrate	{}	{}	e	{'MetabolicReaction', 'MEReaction'}
novbcn_e	C31H36N2O11	0	Metabolite	novobiocin	{}	{}	e	{'MetabolicReaction', 'MEReaction'}
o16a4colipa_e	C312H523N6O200P4	-11	Metabolite	(O16 antigen)x4 core oligosaccharide lipid A	{}	{}	e	{'MetabolicReaction', 'MEReaction'}
o2_e	O2	0	Metabolite	O2	{}	{}	e	{'MetabolicReaction', 'MEReaction'}
o2s_e	O2	-1	Metabolite	Superoxide anion	{}	{}	e	{'MetabolicReaction', 'MEReaction'}
ocdca_e	C18H35O2	-1	Metabolite	octadecanoate (n-C18:0)	{}	{}	e	{'MetabolicReaction', 'MEReaction'}
ocdcea_e	C18H33O2	-1	Metabolite	octadecenoate (n-C18:1)	{}	{}	e	{'MetabolicReaction', 'MEReaction'}
octa_e	C8H15O2	-1	Metabolite	octanoate (n-C8:0)	{}	{}	e	{'MetabolicReaction', 'MEReaction'}
orn_e	C5H13N2O2	1	Metabolite	Ornithine	{}	{}	e	{'MetabolicReaction', 'MEReaction'}
orot_e	C5H3N2O4	-1	Metabolite	Orotate	{}	{}	e	{'MetabolicReaction', 'MEReaction'}
pacald_e	C8H8O	0	Metabolite	Phenylacetaldehyde	{}	{}	e	{'MetabolicReaction', 'MEReaction'}
peamn_e	C8H12N	1	Metabolite	Phenethylamine	{}	{}	e	{'MetabolicReaction', 'MEReaction'}
phe__L_e	C9H11NO2	0	Metabolite	L-Phenylalanine	{}	{}	e	{'MetabolicReaction', 'MEReaction'}
pheme_e	C34H30FeN4O4	-2	Metabolite	Protoheme	{}	{}	e	{'MetabolicReaction', 'MEReaction'}
pi_e	HO4P	-2	Metabolite	Phosphate	{}	{}	e	{'MetabolicReaction', 'MEReaction'}
pnto__R_e	C9H16NO5	-1	Metabolite	(R)-Pantothenate	{}	{}	e	{'MetabolicReaction', 'MEReaction'}
ppa_e	C3H5O2	-1	Metabolite	Propionate (n-C3:0)	{}	{}	e	{'MetabolicReaction', 'MEReaction'}
ppal_e	C3H6O	0	Metabolite	Propanal	{}	{}	e	{'MetabolicReaction', 'MEReaction'}
pppn_e	C9H9O2	-1	Metabolite	Phenylpropanoate	{}	{}	e	{'MetabolicReaction', 'MEReaction'}
ppt_e	HO3P	-2	Metabolite	Phosphonate	{}	{}	e	{'MetabolicReaction', 'MEReaction'}
pro__L_e	C5H9NO2	0	Metabolite	L-Proline	{}	{}	e	{'MetabolicReaction', 'MEReaction'}
progly_e	C7H12N2O3	0	Metabolite	L-Prolinylglycine	{}	{}	e	{'MetabolicReaction', 'MEReaction'}
psclys_e	C12H25N2O7	1	Metabolite	psicoselysine	{}	{}	e	{'MetabolicReaction', 'MEReaction'}
pser__L_e	C3H6NO6P	-2	Metabolite	O-Phospho-L-serine	{}	{}	e	{'MetabolicReaction', 'MEReaction'}
ptrc_e	C4H14N2	2	Metabolite	Putrescine	{}	{}	e	{'MetabolicReaction', 'MEReaction'}
pydam_e	C8H13N2O2	1	Metabolite	Pyridoxamine	{}	{}	e	{'MetabolicReaction', 'MEReaction'}
pydx_e	C8H9NO3	0	Metabolite	Pyridoxal	{}	{}	e	{'MetabolicReaction', 'MEReaction'}
pydxn_e	C8H11NO3	0	Metabolite	Pyridoxine	{}	{}	e	{'MetabolicReaction', 'MEReaction'}
pyr_e	C3H3O3	-1	Metabolite	Pyruvate	{}	{}	e	{'MetabolicReaction', 'MEReaction'}
quin_e	C7H12O6	0	Metabolite	Quinate	{}	{}	e	{'MetabolicReaction', 'MEReaction'}
r5p_e	C5H9O8P	-2	Metabolite	alpha-D-Ribose 5-phosphate	{}	{}	e	{'MetabolicReaction', 'MEReaction'}
rfamp_e	C43H58N4O12	0	Metabolite	rifampin	{}	{}	e	{'MetabolicReaction', 'MEReaction'}
rib__D_e	C5H10O5	0	Metabolite	D-Ribose	{}	{}	e	{'MetabolicReaction', 'MEReaction'}
rmn_e	C6H12O5	0	Metabolite	L-Rhamnose	{}	{}	e	{'MetabolicReaction', 'MEReaction'}
sbt__D_e	C6H14O6	0	Metabolite	D-Sorbitol	{}	{}	e	{'MetabolicReaction', 'MEReaction'}
sel_e	O4Se	-2	Metabolite	Selenate	{}	{}	e	{'MetabolicReaction', 'MEReaction'}
ser__D_e	C3H7NO3	0	Metabolite	D-Serine	{}	{}	e	{'MetabolicReaction', 'MEReaction'}
ser__L_e	C3H7NO3	0	Metabolite	L-Serine	{}	{}	e	{'MetabolicReaction', 'MEReaction'}
skm_e	C7H9O5	-1	Metabolite	Shikimate	{}	{}	e	{'MetabolicReaction', 'MEReaction'}
slnt_e	O3Se	-2	Metabolite	selenite	{}	{}	e	{'MetabolicReaction', 'MEReaction'}
so2_e	O2S	0	Metabolite	sulfur dioxide	{}	{}	e	{'MetabolicReaction', 'MEReaction'}
so3_e	O3S	-2	Metabolite	Sulfite	{}	{}	e	{'MetabolicReaction', 'MEReaction'}
so4_e	O4S	-2	Metabolite	Sulfate	{}	{}	e	{'MetabolicReaction', 'MEReaction'}
spmd_e	C7H22N3	3	Metabolite	Spermidine	{}	{}	e	{'MetabolicReaction', 'MEReaction'}
succ_e	C4H4O4	-2	Metabolite	Succinate	{}	{}	e	{'MetabolicReaction', 'MEReaction'}
sucr_e	C12H22O11	0	Metabolite	Sucrose	{}	{}	e	{'MetabolicReaction', 'MEReaction'}
sulfac_e	C2H2O5S	-2	Metabolite	sulfoacetate	{}	{}	e	{'MetabolicReaction', 'MEReaction'}
tartr__D_e	C4H4O6	-2	Metabolite	D-tartrate	{}	{}	e	{'MetabolicReaction', 'MEReaction'}
tartr__L_e	C4H4O6	-2	Metabolite	L-tartrate	{}	{}	e	{'MetabolicReaction', 'MEReaction'}
taur_e	C2H7NO3S	0	Metabolite	Taurine	{}	{}	e	{'MetabolicReaction', 'MEReaction'}
tcynt_e	CNS	-1	Metabolite	Thiocyanate	{}	{}	e	{'MetabolicReaction', 'MEReaction'}
thm_e	C12H17N4OS	1	Metabolite	Thiamin	{}	{}	e	{'MetabolicReaction', 'MEReaction'}
thr__L_e	C4H9NO3	0	Metabolite	L-Threonine	{}	{}	e	{'MetabolicReaction', 'MEReaction'}
thrp_e	C4H8NO6P	-2	Metabolite	L-Threonine O-3-phosphate	{}	{}	e	{'MetabolicReaction', 'MEReaction'}
thym_e	C5H6N2O2	0	Metabolite	Thymine	{}	{}	e	{'MetabolicReaction', 'MEReaction'}
thymd_e	C10H14N2O5	0	Metabolite	Thymidine	{}	{}	e	{'MetabolicReaction', 'MEReaction'}
tma_e	C3H10N	1	Metabolite	trimethylamine	{}	{}	e	{'MetabolicReaction', 'MEReaction'}
tmao_e	C3H9NO	0	Metabolite	Trimethylamine N-oxide	{}	{}	e	{'MetabolicReaction', 'MEReaction'}
tre_e	C12H22O11	0	Metabolite	Trehalose	{}	{}	e	{'MetabolicReaction', 'MEReaction'}
trp__L_e	C11H12N2O2	0	Metabolite	L-Tryptophan	{}	{}	e	{'MetabolicReaction', 'MEReaction'}
tsul_e	O3S2	-2	Metabolite	Thiosulfate	{}	{}	e	{'MetabolicReaction', 'MEReaction'}
ttdca_e	C14H27O2	-1	Metabolite	tetradecanoate (n-C14:0)	{}	{}	e	{'MetabolicReaction', 'MEReaction'}
ttdcea_e	C14H25O2	-1	Metabolite	tetradecenoate (n-C14:1)	{}	{}	e	{'MetabolicReaction', 'MEReaction'}
ttrcyc_e	C22H24N2O8	0	Metabolite	tetracycline	{}	{}	e	{'MetabolicReaction', 'MEReaction'}
tungs_e	O4W1	-2	Metabolite	tungstate	{}	{}	e	{'MetabolicReaction', 'MEReaction'}
tym_e	C8H12NO	1	Metabolite	Tyramine	{}	{}	e	{'MetabolicReaction', 'MEReaction'}
tyr__L_e	C9H11NO3	0	Metabolite	L-Tyrosine	{}	{}	e	{'MetabolicReaction', 'MEReaction'}
tyrp_e	C9H10NO6P	-2	Metabolite	Phosphotyrosine	{}	{}	e	{'MetabolicReaction', 'MEReaction'}
uacgam_e	C17H25N3O17P2	-2	Metabolite	UDP-N-acetyl-D-glucosamine	{}	{}	e	{'MetabolicReaction', 'MEReaction'}
udpacgal_e	C17H25N3O17P2	-2	Metabolite	UDP-N-acetyl-D-galactosamine	{}	{}	e	{'MetabolicReaction', 'MEReaction'}
udpg_e	C15H22N2O17P2	-2	Metabolite	UDPglucose	{}	{}	e	{'MetabolicReaction', 'MEReaction'}
udpgal_e	C15H22N2O17P2	-2	Metabolite	UDPgalactose	{}	{}	e	{'MetabolicReaction', 'MEReaction'}
udpglcur_e	C15H19N2O18P2	-3	Metabolite	UDP-D-glucuronate	{}	{}	e	{'MetabolicReaction', 'MEReaction'}
ump_e	C9H11N2O9P	-2	Metabolite	UMP	{}	{}	e	{'MetabolicReaction', 'MEReaction'}
ura_e	C4H4N2O2	0	Metabolite	Uracil	{}	{}	e	{'MetabolicReaction', 'MEReaction'}
urea_e	CH4N2O	0	Metabolite	Urea	{}	{}	e	{'MetabolicReaction', 'MEReaction'}
uri_e	C9H12N2O6	0	Metabolite	Uridine	{}	{}	e	{'MetabolicReaction', 'MEReaction'}
val__L_e	C5H11NO2	0	Metabolite	L-Valine	{}	{}	e	{'MetabolicReaction', 'MEReaction'}
xan_e	C5H4N4O2	0	Metabolite	Xanthine	{}	{}	e	{'MetabolicReaction', 'MEReaction'}
xmp_e	C10H11N4O9P	-2	Metabolite	Xanthosine 5'-phosphate	{}	{}	e	{'MetabolicReaction', 'MEReaction'}
xtsn_e	C10H12N4O6	0	Metabolite	Xanthosine	{}	{}	e	{'MetabolicReaction', 'MEReaction'}
xyl__D_e	C5H10O5	0	Metabolite	D-Xylose	{}	{}	e	{'MetabolicReaction', 'MEReaction'}
xylu__L_e	C5H10O5	0	Metabolite	L-Xylulose	{}	{}	e	{'MetabolicReaction', 'MEReaction'}
zn2_e	Zn	2	Metabolite	Zinc	{}	{}	e	{'MetabolicReaction', 'MEReaction'}
12dgr120_p	C27H52O5	0	Metabolite	1,2-Diacyl-sn-glycerol (didodecanoyl, n-C12:0)	{}	{}	p	{'MetabolicReaction'}
12dgr140_p	C31H60O5	0	Metabolite	1,2-Diacyl-sn-glycerol (ditetradecanoyl, n-C14:0)	{}	{}	p	{'MetabolicReaction'}
12dgr141_p	C31H56O5	0	Metabolite	1,2-Diacyl-sn-glycerol (ditetradec-7-enoyl, n-C14:1)	{}	{}	p	{'MetabolicReaction'}
12dgr160_p	C35H68O5	0	Metabolite	1,2-Diacyl-sn-glycerol (dihexadecanoyl, n-C16:0)	{}	{}	p	{'MetabolicReaction'}
12dgr161_p	C35H64O5	0	Metabolite	1,2-Diacyl-sn-glycerol (dihexadec-9-enoyl, n-C16:1)	{}	{}	p	{'MetabolicReaction'}
12dgr180_p	C39H76O5	0	Metabolite	1,2-Diacyl-sn-glycerol (dioctadecanoyl, n-C18:0)	{}	{}	p	{'MetabolicReaction'}
12dgr181_p	C39H72O5	0	Metabolite	1,2-Diacyl-sn-glycerol (dioctadec-11-enoyl, n-C18:1)	{}	{}	p	{'MetabolicReaction'}
12ppd__R_p	C3H8O2	0	Metabolite	(R)-Propane-1,2-diol	{}	{}	p	{'MetabolicReaction'}
12ppd__S_p	C3H8O2	0	Metabolite	(S)-Propane-1,2-diol	{}	{}	p	{'MetabolicReaction'}
14glucan_p	C36H62O31	0	Metabolite	1,4-alpha-D-glucan	{}	{}	p	{'MetabolicReaction'}
15dap_p	C5H16N2	2	Metabolite	1,5-Diaminopentane	{}	{}	p	{'MetabolicReaction'}
1agpe120_p	C17H36NO7P1	0	Metabolite	1-Acyl-sn-glycero-3-phosphoethanolamine (n-C12:0)	{}	{}	p	{'MetabolicReaction'}
1agpe140_p	C19H40NO7P1	0	Metabolite	1-Acyl-sn-glycero-3-phosphoethanolamine (n-C14:0)	{}	{}	p	{'MetabolicReaction'}
1agpe141_p	C19H38NO7P1	0	Metabolite	1-Acyl-sn-glycero-3-phosphoethanolamine (n-C14:1)	{}	{}	p	{'MetabolicReaction'}
1agpe160_p	C21H44NO7P1	0	Metabolite	1-Acyl-sn-glycero-3-phosphoethanolamine (n-C16:0)	{}	{}	p	{'MetabolicReaction'}
1agpe161_p	C21H42NO7P1	0	Metabolite	1-Acyl-sn-glycero-3-phosphoethanolamine (n-C16:1)	{}	{}	p	{'MetabolicReaction'}
1agpe180_p	C23H48NO7P1	0	Metabolite	1-Acyl-sn-glycero-3-phosphoethanolamine (n-C18:0)	{}	{}	p	{'MetabolicReaction'}
1agpe181_p	C23H46NO7P1	0	Metabolite	1-Acyl-sn-glycero-3-phosphoethanolamine (n-C18:1)	{}	{}	p	{'MetabolicReaction'}
1agpg120_p	C18H36O9P1	-1	Metabolite	1-Acyl-sn-glycero-3-phosphoglycerol (n-C12:0)	{}	{}	p	{'MetabolicReaction'}
1agpg140_p	C20H40O9P1	-1	Metabolite	1-Acyl-sn-glycero-3-phosphoglycerol (n-C14:0)	{}	{}	p	{'MetabolicReaction'}
1agpg141_p	C20H38O9P1	-1	Metabolite	1-Acyl-sn-glycero-3-phosphoglycerol (n-C14:1)	{}	{}	p	{'MetabolicReaction'}
1agpg160_p	C22H44O9P1	-1	Metabolite	1-Acyl-sn-glycero-3-phosphoglycerol (n-C16:0)	{}	{}	p	{'MetabolicReaction'}
1agpg161_p	C22H42O9P1	-1	Metabolite	1-Acyl-sn-glycero-3-phosphoglycerol (n-C16:1)	{}	{}	p	{'MetabolicReaction'}
1agpg180_p	C24H48O9P1	-1	Metabolite	1-Acyl-sn-glycero-3-phosphoglycerol (n-C18:0)	{}	{}	p	{'MetabolicReaction'}
1agpg181_p	C24H46O9P1	-1	Metabolite	1-Acyl-sn-glycero-3-phosphoglycerol (n-C18:1)	{}	{}	p	{'MetabolicReaction'}
1ddecg3p_p	C15H29O7P1	-2	Metabolite	1-dodecanoyl-sn-glycerol 3-phosphate	{}	{}	p	{'MetabolicReaction'}
1hdec9eg3p_p	C19H35O7P1	-2	Metabolite	1-hexadec-9-enoyl-sn-glycerol 3-phosphate	{}	{}	p	{'MetabolicReaction'}
1hdecg3p_p	C19H37O7P1	-2	Metabolite	1-hexadecanoyl-sn-glycerol 3-phosphate	{}	{}	p	{'MetabolicReaction'}
1odec11eg3p_p	C21H39O7P1	-2	Metabolite	1-octadec-11-enoyl-sn-glycerol 3-phosphate	{}	{}	p	{'MetabolicReaction'}
1odecg3p_p	C21H41O7P1	-2	Metabolite	1-octadecanoyl-sn-glycerol 3-phosphate	{}	{}	p	{'MetabolicReaction'}
1tdec7eg3p_p	C17H31O7P1	-2	Metabolite	1-tetradec-7-enoyl-sn-glycerol 3-phosphate	{}	{}	p	{'MetabolicReaction'}
1tdecg3p_p	C17H33O7P1	-2	Metabolite	1-tetradecanoyl-sn-glycerol 3-phosphate	{}	{}	p	{'MetabolicReaction'}
23camp_p	C10H11N5O6P	-1	Metabolite	2',3'-Cyclic AMP	{}	{}	p	{'MetabolicReaction'}
23ccmp_p	C9H11N3O7P	-1	Metabolite	2',3'-Cyclic CMP	{}	{}	p	{'MetabolicReaction'}
23cgmp_p	C10H11N5O7P	-1	Metabolite	2',3'-Cyclic GMP	{}	{}	p	{'MetabolicReaction'}
23cump_p	C9H10N2O8P	-1	Metabolite	2',3'-Cyclic UMP	{}	{}	p	{'MetabolicReaction'}
23dappa_p	C3H9N2O2	1	Metabolite	2,3-diaminopropionate	{}	{}	p	{'MetabolicReaction'}
26dap__M_p	C7H14N2O4	0	Metabolite	meso-2,6-Diaminoheptanedioate	{}	{}	p	{'MetabolicReaction'}
2agpe120_p	C17H36NO7P1	0	Metabolite	2-Acyl-sn-glycero-3-phosphoethanolamine (n-C12:0)	{}	{}	p	{'MetabolicReaction'}
2agpe140_p	C19H40NO7P1	0	Metabolite	2-Acyl-sn-glycero-3-phosphoethanolamine (n-C14:0)	{}	{}	p	{'MetabolicReaction'}
2agpe141_p	C19H38NO7P1	0	Metabolite	2-Acyl-sn-glycero-3-phosphoethanolamine (n-C14:1)	{}	{}	p	{'MetabolicReaction'}
2agpe160_p	C21H44NO7P1	0	Metabolite	2-Acyl-sn-glycero-3-phosphoethanolamine (n-C16:0)	{}	{}	p	{'PostTranslationReaction', 'MetabolicReaction'}
2agpe161_p	C21H42NO7P1	0	Metabolite	2-Acyl-sn-glycero-3-phosphoethanolamine (n-C16:1)	{}	{}	p	{'MetabolicReaction'}
2agpe180_p	C23H48NO7P1	0	Metabolite	2-Acyl-sn-glycero-3-phosphoethanolamine (n-C18:0)	{}	{}	p	{'MetabolicReaction'}
2agpe181_p	C23H46NO7P1	0	Metabolite	2-Acyl-sn-glycero-3-phosphoethanolamine (n-C18:1)	{}	{}	p	{'MetabolicReaction'}
2agpg120_p	C18H36O9P1	-1	Metabolite	2-Acyl-sn-glycero-3-phosphoglycerol (n-C12:0)	{}	{}	p	{'MetabolicReaction'}
2agpg140_p	C20H40O9P1	-1	Metabolite	2-Acyl-sn-glycero-3-phosphoglycerol (n-C14:0)	{}	{}	p	{'MetabolicReaction'}
2agpg141_p	C20H38O9P1	-1	Metabolite	2-Acyl-sn-glycero-3-phosphoglycerol (n-C14:1)	{}	{}	p	{'MetabolicReaction'}
2agpg160_p	C22H44O9P1	-1	Metabolite	2-Acyl-sn-glycero-3-phosphoglycerol (n-C16:0)	{}	{}	p	{'PostTranslationReaction', 'MetabolicReaction'}
2agpg161_p	C22H42O9P1	-1	Metabolite	2-Acyl-sn-glycero-3-phosphoglycerol (n-C16:1)	{}	{}	p	{'MetabolicReaction'}
2agpg180_p	C24H48O9P1	-1	Metabolite	2-Acyl-sn-glycero-3-phosphoglycerol (n-C18:0)	{}	{}	p	{'MetabolicReaction'}
2agpg181_p	C24H46O9P1	-1	Metabolite	2-Acyl-sn-glycero-3-phosphoglycerol (n-C18:1)	{}	{}	p	{'MetabolicReaction'}
2ddecg3p_p	C15H30O7P1	-1	Metabolite	2-dodecanoyl-sn-glycerol 3-phosphate	{}	{}	p	{'MetabolicReaction'}
2ddglcn_p	C6H9O6	-1	Metabolite	2-Dehydro-3-deoxy-D-gluconate	{}	{}	p	{'MetabolicReaction'}
2hdec9eg3p_p	C19H36O7P1	-1	Metabolite	2-hexadec-9-enoyl-sn-glycerol 3-phosphate	{}	{}	p	{'MetabolicReaction'}
2hdecg3p_p	C19H38O7P1	-1	Metabolite	2-hexadecanoyl-sn-glycerol 3-phosphate	{}	{}	p	{'MetabolicReaction'}
2odec11eg3p_p	C21H40O7P1	-1	Metabolite	2-octadec-11-enoyl-sn-glycerol 3-phosphate	{}	{}	p	{'MetabolicReaction'}
2odecg3p_p	C21H42O7P1	-1	Metabolite	2-octadecanoyl-sn-glycerol 3-phosphate	{}	{}	p	{'MetabolicReaction'}
2tdec7eg3p_p	C17H32O7P1	-1	Metabolite	2-tetradec-7-enoyl-sn-glycerol 3-phosphate	{}	{}	p	{'MetabolicReaction'}
2tdecg3p_p	C17H34O7P1	-1	Metabolite	2-tetradecanoyl-sn-glycerol 3-phosphate	{}	{}	p	{'MetabolicReaction'}
34dhpac_p	C8H8O3	0	Metabolite	3,4-Dihydroxyphenylacetaldehyde	{}	{}	p	{'MetabolicReaction'}
3amp_p	C10H12N5O7P	-2	Metabolite	3'-AMP	{}	{}	p	{'MetabolicReaction'}
3cmp_p	C9H12N3O8P	-2	Metabolite	3'-cmp	{}	{}	p	{'MetabolicReaction'}
3gmp_p	C10H12N5O8P	-2	Metabolite	3'-GMP	{}	{}	p	{'MetabolicReaction'}
3hcinnm_p	C9H7O3	-1	Metabolite	3-hydroxycinnamic acid	{}	{}	p	{'MetabolicReaction'}
3hpp_p	C3H5O3	-1	Metabolite	3-Hydroxypropanoate	{}	{}	p	{'MetabolicReaction'}
3hpppn_p	C9H9O3	-1	Metabolite	3-(3-hydroxy-phenyl)propionate	{}	{}	p	{'MetabolicReaction'}
3ump_p	C9H11N2O9P	-2	Metabolite	3'-UMP	{}	{}	p	{'MetabolicReaction'}
4abut_p	C4H9NO2	0	Metabolite	4-Aminobutanoate	{}	{}	p	{'MetabolicReaction'}
4hoxpacd_p	C8H8O2	0	Metabolite	4-Hydroxyphenylacetaldehyde	{}	{}	p	{'MetabolicReaction'}
5dglcn_p	C6H9O7	-1	Metabolite	5-Dehydro-D-gluconate	{}	{}	p	{'MetabolicReaction'}
5mtr_p	C6H12O4S	0	Metabolite	5-Methylthio-D-ribose	{}	{}	p	{'MetabolicReaction'}
LalaDglu_p	C8H13N2O5	-1	Metabolite	L-alanine-D-glutamate	{}	{}	p	{'MetabolicReaction'}
LalaDgluMdap_p	C15H25N4O8	-1	Metabolite	L-alanine-D-glutamate-meso-2,6-diaminoheptanedioate	{}	{}	p	{'MetabolicReaction'}
LalaDgluMdapDala_p	C18H30N5O9	-1	Metabolite	L-alanine-D-glutamate-meso-2,6-diaminoheptanedioate-D-alanine	{}	{}	p	{'MetabolicReaction'}
LalaLglu_p	C8H13N2O5	-1	Metabolite	L-alanine-L-glutamate	{}	{}	p	{'MetabolicReaction'}
ac_p	C2H3O2	-1	Metabolite	Acetate	{}	{}	p	{'MetabolicReaction'}
acac_p	C4H5O3	-1	Metabolite	Acetoacetate	{}	{}	p	{'MetabolicReaction'}
acald_p	C2H4O	0	Metabolite	Acetaldehyde	{}	{}	p	{'MetabolicReaction'}
acgal_p	C8H15NO6	0	Metabolite	N-Acetyl-D-galactosamine	{}	{}	p	{'MetabolicReaction'}
acgal1p_p	C8H14NO9P	-2	Metabolite	N-Acetyl-D-galactosamine 1-phosphate	{}	{}	p	{'MetabolicReaction'}
acgam_p	C8H15NO6	0	Metabolite	N-Acetyl-D-glucosamine	{}	{}	p	{'MetabolicReaction'}
acgam1p_p	C8H14NO9P	-2	Metabolite	N-Acetyl-D-glucosamine 1-phosphate	{}	{}	p	{'MetabolicReaction'}
acmana_p	C8H15NO6	0	Metabolite	N-Acetyl-D-mannosamine	{}	{}	p	{'MetabolicReaction'}
acmum_p	C11H18NO8	-1	Metabolite	N-Acetylmuramate	{}	{}	p	{'MetabolicReaction'}
acnam_p	C11H18NO9	-1	Metabolite	N-Acetylneuraminate	{}	{}	p	{'MetabolicReaction'}
acolipa_p	C181H314N3O103P4	-9	Metabolite	4-Amino-4-deoxy-L-arabinose modified core oligosaccharide lipid A	{}	{}	p	{'MetabolicReaction'}
acser_p	C5H9NO4	0	Metabolite	O-Acetyl-L-serine	{}	{}	p	{'MetabolicReaction'}
ade_p	C5H5N5	0	Metabolite	Adenine	{}	{}	p	{'MetabolicReaction'}
adn_p	C10H13N5O4	0	Metabolite	Adenosine	{}	{}	p	{'MetabolicReaction'}
adocbl_p	C72H100CoN18O17P	0	Metabolite	Adenosylcobalamin	{}	{}	p	{'MetabolicReaction'}
agm_p	C5H16N4	2	Metabolite	Agmatine	{}	{}	p	{'MetabolicReaction'}
akg_p	C5H4O5	-2	Metabolite	2-Oxoglutarate	{}	{}	p	{'MetabolicReaction'}
ala__B_p	C3H7NO2	0	Metabolite	beta-Alanine	{}	{}	p	{'MetabolicReaction'}
ala__D_p	C3H7NO2	0	Metabolite	D-Alanine	{}	{}	p	{'MetabolicReaction'}
ala__L_p	C3H7NO2	0	Metabolite	L-Alanine	{}	{}	p	{'MetabolicReaction'}
alaala_p	C6H12N2O3	0	Metabolite	D-Alanyl-D-alanine	{}	{}	p	{'MetabolicReaction'}
all__D_p	C6H12O6	0	Metabolite	D-Allose	{}	{}	p	{'MetabolicReaction'}
alltn_p	C4H6N4O3	0	Metabolite	Allantoin	{}	{}	p	{'MetabolicReaction'}
amp_p	C10H12N5O7P	-2	Metabolite	AMP	{}	{}	p	{'MetabolicReaction'}
anhgm_p	C19H29N2O12	-1	Metabolite	N-Acetyl-D-glucosamine(anhydrous)N-Acetylmuramic acid	{}	{}	p	{'MetabolicReaction'}
anhgm3p_p	C34H52N6O19	-2	Metabolite	N-Acetyl-D-glucosamine(anhydrous)N-Acetylmuramyl-tripeptide	{}	{}	p	{'MetabolicReaction'}
anhgm4p_p	C37H57N7O20	-2	Metabolite	N-Acetyl-D-glucosamine(anhydrous)N-Acetylmuramyl-tetrapeptide	{}	{}	p	{'MetabolicReaction'}
arab__L_p	C5H10O5	0	Metabolite	L-Arabinose	{}	{}	p	{'MetabolicReaction'}
arbt_p	C12H16O7	0	Metabolite	Arbutin	{}	{}	p	{'MetabolicReaction'}
arbtn_p	C22H33N4O13	-3	Metabolite	aerobactin minus Fe3	{}	{}	p	{'MetabolicReaction'}
arbtn__fe3_p	C22H33FeN4O13	0	Metabolite	Aerobactin	{}	{}	p	{'MetabolicReaction'}
arg__L_p	C6H15N4O2	1	Metabolite	L-Arginine	{}	{}	p	{'MetabolicReaction'}
ascb__L_p	C6H8O6	0	Metabolite	L-Ascorbate	{}	{}	p	{'MetabolicReaction'}
asn__L_p	C4H8N2O3	0	Metabolite	L-Asparagine	{}	{}	p	{'MetabolicReaction'}
aso3_p	AsO3	-3	Metabolite	arsenite	{}	{}	p	{'MetabolicReaction'}
asp__L_p	C4H6NO4	-1	Metabolite	L-Aspartate	{}	{}	p	{'MetabolicReaction'}
btn_p	C10H15N2O3S	-1	Metabolite	Biotin	{}	{}	p	{'MetabolicReaction'}
but_p	C4H7O2	-1	Metabolite	Butyrate (n-C4:0)	{}	{}	p	{'MetabolicReaction'}
butso3_p	C4H9O3S	-1	Metabolite	butanesulfonate	{}	{}	p	{'MetabolicReaction'}
ca2_p	Ca	2	Metabolite	Calcium	{}	{}	p	{'MetabolicReaction'}
cbi_p	C48H72CoN11O8	0	Metabolite	Cobinamide	{}	{}	p	{'MetabolicReaction'}
cbl1_p	C62H88CoN13O14P	-1	Metabolite	Cob(I)alamin	{}	{}	p	{'MetabolicReaction'}
cd2_p	Cd	2	Metabolite	Cadmium	{}	{}	p	{'MetabolicReaction'}
cgly_p	C5H10N2O3S	0	Metabolite	Cys-Gly	{}	{}	p	{'MetabolicReaction'}
chol_p	C5H14NO	1	Metabolite	Choline	{}	{}	p	{'MetabolicReaction'}
chtbs_p	C16H28N2O11	0	Metabolite	N,N'-diacetylchitobiose	{}	{}	p	{'MetabolicReaction'}
cit_p	C6H5O7	-3	Metabolite	Citrate	{}	{}	p	{'MetabolicReaction'}
cl_p	Cl	-1	Metabolite	Chloride	{}	{}	p	{'MetabolicReaction'}
clpn120_p	C57H108O17P2	-2	Metabolite	cardiolipin (tetradodecanoyl, n-C12:0)	{}	{}	p	{'MetabolicReaction'}
clpn140_p	C65H124O17P2	-2	Metabolite	cardiolipin (tetratetradecanoyl, n-C14:0)	{}	{}	p	{'MetabolicReaction'}
clpn141_p	C65H116O17P2	-2	Metabolite	cardiolipin (tetratetradec-7-enoyl, n-C14:1)	{}	{}	p	{'MetabolicReaction'}
clpn160_p	C73H140O17P2	-2	Metabolite	cardiolipin (tetrahexadecanoyl, n-C16:0)	{}	{}	p	{'MetabolicReaction'}
clpn161_p	C73H132O17P2	-2	Metabolite	cardiolipin (tetrahexadec-9-enoyl, n-C16:1)	{}	{}	p	{'MetabolicReaction'}
clpn180_p	C81H156O17P2	-2	Metabolite	cardiolipin (tetraoctadecanoyl, n-C18:0)	{}	{}	p	{'MetabolicReaction'}
clpn181_p	C81H148O17P2	-2	Metabolite	cardiolipin (tetraoctadec-11-enoyl, n-C18:1)	{}	{}	p	{'MetabolicReaction'}
cm_p	C11H12Cl2N2O5	0	Metabolite	Chloramphenicol	{}	{}	p	{'MetabolicReaction'}
cmp_p	C9H12N3O8P	-2	Metabolite	CMP	{}	{}	p	{'MetabolicReaction'}
co2_p	CO2	0	Metabolite	CO2	{}	{}	p	{'MetabolicReaction'}
cobalt2_p	Co	2	Metabolite	Co2+	{}	{}	p	{'MetabolicReaction'}
colipa_p	C176H303N2O100P4	-11	Metabolite	core oligosaccharide lipid A	{}	{}	p	{'MetabolicReaction'}
colipap_p	C176H303N2O103P5	-12	Metabolite	core oligosaccharide lipid A diphosphate	{}	{}	p	{'MetabolicReaction'}
cpgn_p	C35H52N6O13Fe	-1	Metabolite	coprogen	{}	{}	p	{'MetabolicReaction'}
cpgn__un_p	C35H52N6O13	-4	Metabolite	coprogen unloaded (no Fe(III))	{}	{}	p	{'MetabolicReaction'}
crn_p	C7H15NO3	0	Metabolite	L-Carnitine	{}	{}	p	{'MetabolicReaction'}
crn__D_p	C7H15NO3	0	Metabolite	D-Carnitine	{}	{}	p	{'MetabolicReaction'}
csn_p	C4H5N3O	0	Metabolite	Cytosine	{}	{}	p	{'MetabolicReaction'}
ctbt_p	C7H13NO2	0	Metabolite	crotonobetaine	{}	{}	p	{'MetabolicReaction'}
cu_p	Cu	1	Metabolite	Cu+	{}	{}	p	{'MetabolicReaction'}
cu2_p	Cu	2	Metabolite	Cu2+	{}	{}	p	{'MetabolicReaction'}
cyan_p	CHN	0	Metabolite	Hydrogen cyanide	{}	{}	p	{'MetabolicReaction'}
cynt_p	CNO	-1	Metabolite	Cyanate	{}	{}	p	{'MetabolicReaction'}
cys__D_p	C3H7NO2S	0	Metabolite	D-Cysteine	{}	{}	p	{'MetabolicReaction'}
cys__L_p	C3H7NO2S	0	Metabolite	L-Cysteine	{}	{}	p	{'MetabolicReaction'}
cytd_p	C9H13N3O5	0	Metabolite	Cytidine	{}	{}	p	{'MetabolicReaction'}
dad__2_p	C10H13N5O3	0	Metabolite	Deoxyadenosine	{}	{}	p	{'MetabolicReaction'}
damp_p	C10H12N5O6P	-2	Metabolite	dAMP	{}	{}	p	{'MetabolicReaction'}
dca_p	C10H19O2	-1	Metabolite	Decanoate (n-C10:0)	{}	{}	p	{'MetabolicReaction'}
dcmp_p	C9H12N3O7P	-2	Metabolite	dCMP	{}	{}	p	{'MetabolicReaction'}
dcyt_p	C9H13N3O4	0	Metabolite	Deoxycytidine	{}	{}	p	{'MetabolicReaction'}
ddca_p	C12H23O2	-1	Metabolite	Dodecanoate (n-C12:0)	{}	{}	p	{'MetabolicReaction'}
dgmp_p	C10H12N5O7P	-2	Metabolite	dGMP	{}	{}	p	{'MetabolicReaction'}
dgsn_p	C10H13N5O4	0	Metabolite	Deoxyguanosine	{}	{}	p	{'MetabolicReaction'}
dha_p	C3H6O3	0	Metabolite	Dihydroxyacetone	{}	{}	p	{'MetabolicReaction'}
dimp_p	C10H11N4O7P	-2	Metabolite	dIMP	{}	{}	p	{'MetabolicReaction'}
din_p	C10H12N4O4	0	Metabolite	Deoxyinosine	{}	{}	p	{'MetabolicReaction'}
dms_p	C2H6S	0	Metabolite	Dimethyl sulfide	{}	{}	p	{'MetabolicReaction'}
dmso_p	C2H6OS	0	Metabolite	Dimethyl sulfoxide	{}	{}	p	{'MetabolicReaction'}
dopa_p	C8H12NO2	1	Metabolite	Dopamine	{}	{}	p	{'MetabolicReaction'}
doxrbcn_p	C27H29NO11	0	Metabolite	doxorubicin	{}	{}	p	{'MetabolicReaction'}
dtmp_p	C10H13N2O8P	-2	Metabolite	dTMP	{}	{}	p	{'MetabolicReaction'}
dump_p	C9H11N2O8P	-2	Metabolite	dUMP	{}	{}	p	{'MetabolicReaction'}
duri_p	C9H12N2O5	0	Metabolite	Deoxyuridine	{}	{}	p	{'MetabolicReaction'}
eca2und_p	C103H162N6O37P2	-4	Metabolite	(enterobacterial common antigen)x2 undecaprenyl-diphosphate	{}	{}	p	{'MetabolicReaction'}
eca3und_p	C127H198N9O52P2	-5	Metabolite	(enterobacterial common antigen)x3 undecaprenyl-diphosphate	{}	{}	p	{'MetabolicReaction'}
eca4colipa_p	C272H447N14O160P4	-15	Metabolite	(enterobacterial common antigen)x4 core oligosaccharide lipid A	{}	{}	p	{'MetabolicReaction'}
eca4und_p	C151H234N12O67P2	-6	Metabolite	(enterobacterial common antigen)x4 undecaprenyl-diphosphate	{}	{}	p	{'MetabolicReaction'}
enlipa_p	C112H202N3O42P3	-6	Metabolite	phosphoethanolamine KDO(2)-lipid (A)	{}	{}	p	{'MetabolicReaction'}
enter_p	C30H27N3O15	0	Metabolite	Enterochelin	{}	{}	p	{'MetabolicReaction'}
etha_p	C2H8NO	1	Metabolite	Ethanolamine	{}	{}	p	{'MetabolicReaction'}
ethso3_p	C2H5O3S	-1	Metabolite	ethanesulfonate	{}	{}	p	{'MetabolicReaction'}
etoh_p	C2H6O	0	Metabolite	Ethanol	{}	{}	p	{'MetabolicReaction'}
f6p_p	C6H11O9P	-2	Metabolite	D-Fructose 6-phosphate	{}	{}	p	{'MetabolicReaction'}
fald_p	CH2O	0	Metabolite	Formaldehyde	{}	{}	p	{'MetabolicReaction'}
fe2_p	Fe	2	Metabolite	Fe2+	{}	{}	p	{'MetabolicReaction'}
fe3_p	Fe	3	Metabolite	Fe3+	{}	{}	p	{'MetabolicReaction'}
fe3dcit_p	C12H10FeO14	-3	Metabolite	Fe(III)dicitrate	{}	{}	p	{'MetabolicReaction'}
fe3dhbzs_p	C10H10NO6Fe	2	Metabolite	ferric 2,3-dihydroxybenzoylserine	{}	{}	p	{'MetabolicReaction'}
fe3hox_p	C9H18O6N3Fe	0	Metabolite	Fe(III)hydroxamate	{}	{}	p	{'MetabolicReaction'}
fe3hox__un_p	C9H18O6N3	-3	Metabolite	Fe(III)hydoxamate, unloaded	{}	{}	p	{'MetabolicReaction'}
fecrm_p	C27H42FeN9O12	0	Metabolite	Ferrichrome	{}	{}	p	{'MetabolicReaction'}
fecrm__un_p	C27H42N9O12	-3	Metabolite	Ferrichrome minus Fe(III)	{}	{}	p	{'MetabolicReaction'}
feenter_p	C30H27FeN3O15	3	Metabolite	Fe-enterobactin	{}	{}	p	{'MetabolicReaction'}
feoxam_p	C25H46FeN6O8	1	Metabolite	ferroxamine	{}	{}	p	{'MetabolicReaction'}
feoxam__un_p	C25H46N6O8	-2	Metabolite	ferroxamine minus Fe(3)	{}	{}	p	{'MetabolicReaction'}
for_p	CH1O2	-1	Metabolite	Formate	{}	{}	p	{'MetabolicReaction'}
fru_p	C6H12O6	0	Metabolite	D-Fructose	{}	{}	p	{'MetabolicReaction'}
frulys_p	C12H25N2O7	1	Metabolite	fructoselysine	{}	{}	p	{'MetabolicReaction'}
fruur_p	C6H9O7	-1	Metabolite	D-Fructuronate	{}	{}	p	{'MetabolicReaction'}
fuc__L_p	C6H12O5	0	Metabolite	L-Fucose	{}	{}	p	{'MetabolicReaction'}
fum_p	C4H2O4	-2	Metabolite	Fumarate	{}	{}	p	{'MetabolicReaction'}
fusa_p	C31H48O5	0	Metabolite	fusidic acid	{}	{}	p	{'MetabolicReaction'}
g1p_p	C6H11O9P	-2	Metabolite	D-Glucose 1-phosphate	{}	{}	p	{'MetabolicReaction'}
g3pc_p	C8H20NO6P	0	Metabolite	sn-Glycero-3-phosphocholine	{}	{}	p	{'MetabolicReaction'}
g3pe_p	C5H14NO6P	0	Metabolite	sn-Glycero-3-phosphoethanolamine	{}	{}	p	{'MetabolicReaction'}
g3pg_p	C6H14O8P	-1	Metabolite	Glycerophosphoglycerol	{}	{}	p	{'MetabolicReaction'}
g3pi_p	C9H18O11P	-1	Metabolite	sn-Glycero-3-phospho-1-inositol	{}	{}	p	{'MetabolicReaction'}
g3ps_p	C6H13NO8P	-1	Metabolite	Glycerophosphoserine	{}	{}	p	{'MetabolicReaction'}
g6p_p	C6H11O9P	-2	Metabolite	D-Glucose 6-phosphate	{}	{}	p	{'MetabolicReaction'}
gal_p	C6H12O6	0	Metabolite	D-Galactose	{}	{}	p	{'MetabolicReaction'}
gal__bD_p	C6H12O6	0	Metabolite	beta D-Galactose	{}	{}	p	{'MetabolicReaction'}
gal1p_p	C6H11O9P	-2	Metabolite	alpha-D-Galactose 1-phosphate	{}	{}	p	{'MetabolicReaction'}
galct__D_p	C6H8O8	-2	Metabolite	D-Galactarate	{}	{}	p	{'MetabolicReaction'}
galctn__D_p	C6H11O7	-1	Metabolite	D-Galactonate	{}	{}	p	{'MetabolicReaction'}
galctn__L_p	C6H11O7	-1	Metabolite	L-Galactonate	{}	{}	p	{'MetabolicReaction'}
galt_p	C6H14O6	0	Metabolite	Galactitol	{}	{}	p	{'MetabolicReaction'}
galur_p	C6H9O7	-1	Metabolite	D-Galacturonate	{}	{}	p	{'MetabolicReaction'}
gam_p	C6H14NO5	1	Metabolite	D-Glucosamine	{}	{}	p	{'MetabolicReaction'}
gam6p_p	C6H13NO8P	-1	Metabolite	D-Glucosamine 6-phosphate	{}	{}	p	{'MetabolicReaction'}
gbbtn_p	C7H15NO2	0	Metabolite	gamma-butyrobetaine	{}	{}	p	{'MetabolicReaction'}
gdp_p	C10H12N5O11P2	-3	Metabolite	GDP	{}	{}	p	{'MetabolicReaction'}
glc__D_p	C6H12O6	0	Metabolite	D-Glucose	{}	{}	p	{'MetabolicReaction'}
glcn_p	C6H11O7	-1	Metabolite	D-Gluconate	{}	{}	p	{'MetabolicReaction'}
glcr_p	C6H8O8	-2	Metabolite	D-Glucarate	{}	{}	p	{'MetabolicReaction'}
glcur_p	C6H9O7	-1	Metabolite	D-Glucuronate	{}	{}	p	{'MetabolicReaction'}
glcur1p_p	C6H8O10P	-3	Metabolite	D-Glucuronate 1-phosphate	{}	{}	p	{'MetabolicReaction'}
gln__L_p	C5H10N2O3	0	Metabolite	L-Glutamine	{}	{}	p	{'MetabolicReaction'}
glu__L_p	C5H8NO4	-1	Metabolite	L-Glutamate	{}	{}	p	{'MetabolicReaction'}
gly_p	C2H5NO2	0	Metabolite	Glycine	{}	{}	p	{'MetabolicReaction'}
glyald_p	C3H6O3	0	Metabolite	D-Glyceraldehyde	{}	{}	p	{'MetabolicReaction'}
glyb_p	C5H11NO2	0	Metabolite	Glycine betaine	{}	{}	p	{'MetabolicReaction'}
glyc_p	C3H8O3	0	Metabolite	Glycerol	{}	{}	p	{'MetabolicReaction'}
glyc__R_p	C3H5O4	-1	Metabolite	(R)-Glycerate	{}	{}	p	{'MetabolicReaction'}
glyc2p_p	C3H7O6P	-2	Metabolite	Glycerol 2-phosphate	{}	{}	p	{'MetabolicReaction'}
glyc3p_p	C3H7O6P	-2	Metabolite	Glycerol 3-phosphate	{}	{}	p	{'MetabolicReaction'}
glyclt_p	C2H3O3	-1	Metabolite	Glycolate	{}	{}	p	{'MetabolicReaction'}
gmp_p	C10H12N5O8P	-2	Metabolite	GMP	{}	{}	p	{'MetabolicReaction'}
gsn_p	C10H13N5O5	0	Metabolite	Guanosine	{}	{}	p	{'MetabolicReaction'}
gthox_p	C20H30N6O12S2	-2	Metabolite	Oxidized glutathione	{}	{}	p	{'MetabolicReaction'}
gthrd_p	C10H16N3O6S	-1	Metabolite	Reduced glutathione	{}	{}	p	{'MetabolicReaction'}
gtp_p	C10H12N5O14P3	-4	Metabolite	GTP	{}	{}	p	{'MetabolicReaction'}
gua_p	C5H5N5O	0	Metabolite	Guanine	{}	{}	p	{'MetabolicReaction'}
h_p	H	1	Metabolite	H+	{}	{}	p	{'MetabolicReaction'}
h2_p	H2	0	Metabolite	H2	{}	{}	p	{'MetabolicReaction'}
h2o_p	H2O	0	Metabolite	H2O	{}	{}	p	{'MetabolicReaction'}
h2o2_p	H2O2	0	Metabolite	Hydrogen peroxide	{}	{}	p	{'MetabolicReaction'}
h2s_p	H2S	0	Metabolite	Hydrogen sulfide	{}	{}	p	{'MetabolicReaction'}
hdca_p	C16H31O2	-1	Metabolite	Hexadecanoate (n-C16:0)	{}	{}	p	{'MetabolicReaction'}
hdcea_p	C16H29O2	-1	Metabolite	Hexadecenoate (n-C16:1)	{}	{}	p	{'MetabolicReaction'}
hg2_p	Hg	2	Metabolite	Hg2+	{}	{}	p	{'MetabolicReaction'}
his__L_p	C6H9N3O2	0	Metabolite	L-Histidine	{}	{}	p	{'MetabolicReaction'}
hom__L_p	C4H9NO3	0	Metabolite	L-Homoserine	{}	{}	p	{'MetabolicReaction'}
hxa_p	C6H11O2	-1	Metabolite	Hexanoate (n-C6:0)	{}	{}	p	{'MetabolicReaction'}
hxan_p	C5H4N4O	0	Metabolite	Hypoxanthine	{}	{}	p	{'MetabolicReaction'}
idon__L_p	C6H11O7	-1	Metabolite	L-Idonate	{}	{}	p	{'MetabolicReaction'}
ile__L_p	C6H13NO2	0	Metabolite	L-Isoleucine	{}	{}	p	{'MetabolicReaction'}
imp_p	C10H11N4O8P	-2	Metabolite	IMP	{}	{}	p	{'MetabolicReaction'}
indole_p	C8H7N	0	Metabolite	Indole	{}	{}	p	{'MetabolicReaction'}
inost_p	C6H12O6	0	Metabolite	myo-Inositol	{}	{}	p	{'MetabolicReaction'}
ins_p	C10H12N4O5	0	Metabolite	Inosine	{}	{}	p	{'MetabolicReaction'}
isetac_p	C2H5O4S	-1	Metabolite	Isethionic acid	{}	{}	p	{'MetabolicReaction'}
k_p	K	1	Metabolite	potassium	{}	{}	p	{'MetabolicReaction'}
kdo2lipid4_p	C84H148N2O37P2	-6	Metabolite	KDO(2)-lipid IV(A)	{}	{}	p	{'MetabolicReaction'}
lac__D_p	C3H5O3	-1	Metabolite	D-Lactate	{}	{}	p	{'MetabolicReaction'}
lac__L_p	C3H5O3	-1	Metabolite	L-Lactate	{}	{}	p	{'MetabolicReaction'}
lcts_p	C12H22O11	0	Metabolite	Lactose	{}	{}	p	{'MetabolicReaction'}
leu__L_p	C6H13NO2	0	Metabolite	L-Leucine	{}	{}	p	{'MetabolicReaction'}
lipa_p	C110H196N2O39P2	-6	Metabolite	KDO(2)-lipid (A)	{}	{}	p	{'MetabolicReaction'}
lipa_cold_p	C114H202N2O39P2	-6	Metabolite	cold adapted KDO(2)-lipid (A)	{}	{}	p	{'MetabolicReaction'}
lipoate_p	C8H14O2S2	0	Metabolite	Lipoate	{}	{}	p	{'MetabolicReaction'}
lys__L_p	C6H15N2O2	1	Metabolite	L-Lysine	{}	{}	p	{'MetabolicReaction'}
lyx__L_p	C5H10O5	0	Metabolite	L-Lyxose	{}	{}	p	{'MetabolicReaction'}
mal__D_p	C4H4O5	-2	Metabolite	D-Malate	{}	{}	p	{'MetabolicReaction'}
mal__L_p	C4H4O5	-2	Metabolite	L-Malate	{}	{}	p	{'MetabolicReaction'}
malt_p	C12H22O11	0	Metabolite	Maltose	{}	{}	p	{'MetabolicReaction'}
malthx_p	C36H62O31	0	Metabolite	Maltohexaose	{}	{}	p	{'MetabolicReaction'}
maltpt_p	C30H52O26	0	Metabolite	Maltopentaose	{}	{}	p	{'MetabolicReaction'}
malttr_p	C18H32O16	0	Metabolite	Maltotriose	{}	{}	p	{'MetabolicReaction'}
maltttr_p	C24H42O21	0	Metabolite	Maltotetraose	{}	{}	p	{'MetabolicReaction'}
man_p	C6H12O6	0	Metabolite	D-Mannose	{}	{}	p	{'MetabolicReaction'}
man6p_p	C6H11O9P	-2	Metabolite	D-Mannose 6-phosphate	{}	{}	p	{'MetabolicReaction'}
manglyc_p	C9H15O9	-1	Metabolite	2(alpha-D-Mannosyl)-D-glycerate	{}	{}	p	{'MetabolicReaction'}
melib_p	C12H22O11	0	Metabolite	Melibiose	{}	{}	p	{'MetabolicReaction'}
meoh_p	CH4O1	0	Metabolite	Methanol	{}	{}	p	{'MetabolicReaction'}
met__D_p	C5H10NO2S	0	Metabolite	D-Methionine	{}	{}	p	{'MetabolicReaction'}
met__L_p	C5H11NO2S	0	Metabolite	L-Methionine	{}	{}	p	{'MetabolicReaction'}
metsox__R__L_p	C5H11NO3S	0	Metabolite	L-methionine-R-sulfoxide	{}	{}	p	{'MetabolicReaction'}
metsox__S__L_p	C5H11NO3S	0	Metabolite	L-Methionine Sulfoxide	{}	{}	p	{'MetabolicReaction'}
mg2_p	Mg	2	Metabolite	magnesium	{}	{}	p	{'MetabolicReaction'}
mincyc_p	C23H27N3O7	0	Metabolite	minocycline	{}	{}	p	{'MetabolicReaction'}
minohp_p	C6H6O24P6	-12	Metabolite	myo-Inositol hexakisphosphate	{}	{}	p	{'MetabolicReaction'}
mmet_p	C6H14NO2S	1	Metabolite	S-Methyl-L-methionine	{}	{}	p	{'MetabolicReaction'}
mn2_p	Mn	2	Metabolite	Mn2+	{}	{}	p	{'MetabolicReaction'}
mnl_p	C6H14O6	0	Metabolite	D-Mannitol	{}	{}	p	{'MetabolicReaction'}
mobd_p	MoO4	-2	Metabolite	Molybdate	{}	{}	p	{'MetabolicReaction'}
mso3_p	CH3O3S	-1	Metabolite	methanesulfonate	{}	{}	p	{'MetabolicReaction'}
murein3p3p_p	C68H104N12O38	-4	Metabolite	two linked disacharide tripeptide murein units (uncrosslinked, middle of chain)	{}	{}	p	{'MetabolicReaction'}
murein3px3p_p	C68H102N12O37	-4	Metabolite	two disacharide linked murein units, tripeptide crosslinked tripeptide (A2pm->A2pm) (middle of chain)	{}	{}	p	{'MetabolicReaction'}
murein3px4p_p	C71H107N13O38	-4	Metabolite	two disacharide linked murein units, tripeptide crosslinked tetrapeptide (A2pm->D-ala) (middle of chain)	{}	{}	p	{'MetabolicReaction'}
murein4p3p_p	C71H109N13O39	-4	Metabolite	two linked disacharide tetrapeptide and tripeptide murein units (uncrosslinked, middle of chain)	{}	{}	p	{'MetabolicReaction'}
murein4p4p_p	C74H114N14O40	-4	Metabolite	two linked disacharide tetrapeptide murein units (uncrosslinked, middle of chain)	{}	{}	p	{'MetabolicReaction'}
murein4px4p_p	C74H112N14O39	-4	Metabolite	two disacharide linked murein units, tetrapeptide corsslinked tetrapeptide (A2pm->D-ala) (middle of chain)	{}	{}	p	{'MetabolicReaction'}
murein4px4p4p_p	C111H169N21O59	-6	Metabolite	three disacharide linked murein units (tetrapeptide crosslinked tetrapeptide (A2pm->D-ala), one uncrosslinked tetrapaptide) (middle of chain)	{}	{}	p	{'MetabolicReaction'}
murein4px4px4p_p	C111H167N21O58	-6	Metabolite	three disacharide linked murein units (tetrapeptide crosslinked tetrapeptide (A2pm->D-ala) & tetrapeptide corsslinked tetrapeptide (A2pm->D-ala)) (middle of chain)	{}	{}	p	{'MetabolicReaction'}
murein5p3p_p	C74H114N14O40	-4	Metabolite	two linked disacharide pentapeptide and tripeptide murein units (uncrosslinked, middle of chain)	{}	{}	p	{'MetabolicReaction'}
murein5p4p_p	C77H119N15O41	-4	Metabolite	two linked disacharide pentapeptide and tetrapeptide murein units (uncrosslinked, middle of chain)	{}	{}	p	{'MetabolicReaction'}
murein5p5p_p	C80H124N16O42	-4	Metabolite	two linked disacharide pentapeptide murein units (uncrosslinked, middle of chain)	{}	{}	p	{'MetabolicReaction'}
murein5p5p5p_p	C120H186N24O63	-6	Metabolite	three linked disacharide pentapeptide murein units (uncrosslinked, middle of chain)	{}	{}	p	{'MetabolicReaction'}
murein5px3p_p	C74H112N14O39	-4	Metabolite	two disacharide linked murein units, pentapeptide corsslinked tripeptide (A2pm->A2pm) (middle of chain)	{}	{}	p	{'MetabolicReaction'}
murein5px4p_p	C77H117N15O40	-4	Metabolite	two disacharide linked murein units, pentapeptide crosslinked tetrapeptide (A2pm->D-ala) (middle of chain)	{}	{}	p	{'MetabolicReaction', 'SummaryVariable'}
murein5px4px4p_p	C114H172N22O59	-6	Metabolite	three disacharide linked murein units (pentapeptide crosslinked tetrapeptide (A2pm->D-ala) tetrapeptide corsslinked tetrapeptide (A2pm->D-ala)) (middle of chain)	{}	{}	p	{'MetabolicReaction'}
n2o_p	N2O	0	Metabolite	Nitrous oxide	{}	{}	p	{'MetabolicReaction'}
na1_p	Na	1	Metabolite	Sodium	{}	{}	p	{'MetabolicReaction'}
nac_p	C6H4NO2	-1	Metabolite	Nicotinate	{}	{}	p	{'MetabolicReaction'}
nh4_p	H4N	1	Metabolite	Ammonium	{}	{}	p	{'MetabolicReaction'}
ni2_p	Ni	2	Metabolite	nickel	{}	{}	p	{'MetabolicReaction'}
nmn_p	C11H14N2O8P	-1	Metabolite	NMN	{}	{}	p	{'MetabolicReaction'}
no_p	NO	0	Metabolite	Nitric oxide	{}	{}	p	{'MetabolicReaction'}
no2_p	NO2	-1	Metabolite	Nitrite	{}	{}	p	{'MetabolicReaction'}
no3_p	NO3	-1	Metabolite	Nitrate	{}	{}	p	{'MetabolicReaction'}
novbcn_p	C31H36N2O11	0	Metabolite	novobiocin	{}	{}	p	{'MetabolicReaction'}
o16a2und_p	C123H200N2O57P2	-2	Metabolite	(O16 antigen)x2 undecaprenyl diphosphate	{}	{}	p	{'MetabolicReaction'}
o16a3und_p	C157H255N3O82P2	-2	Metabolite	(O16 antigen)x3 undecaprenyl diphosphate	{}	{}	p	{'MetabolicReaction'}
o16a4colipa_p	C312H523N6O200P4	-11	Metabolite	(O16 antigen)x4 core oligosaccharide lipid A	{}	{}	p	{'MetabolicReaction'}
o16a4und_p	C191H310N4O107P2	-2	Metabolite	(O16 antigen)x4 undecaprenyl diphosphate	{}	{}	p	{'MetabolicReaction'}
o16aund_p	C89H145N1O32P2	-2	Metabolite	O16 antigen undecaprenyl diphosphate	{}	{}	p	{'MetabolicReaction'}
o2_p	O2	0	Metabolite	O2	{}	{}	p	{'MetabolicReaction'}
o2s_p	O2	-1	Metabolite	Superoxide anion	{}	{}	p	{'MetabolicReaction'}
ocdca_p	C18H35O2	-1	Metabolite	octadecanoate (n-C18:0)	{}	{}	p	{'MetabolicReaction'}
ocdcea_p	C18H33O2	-1	Metabolite	octadecenoate (n-C18:1)	{}	{}	p	{'MetabolicReaction'}
octa_p	C8H15O2	-1	Metabolite	octanoate (n-C8:0)	{}	{}	p	{'MetabolicReaction'}
orn_p	C5H13N2O2	1	Metabolite	Ornithine	{}	{}	p	{'MetabolicReaction'}
orot_p	C5H3N2O4	-1	Metabolite	Orotate	{}	{}	p	{'MetabolicReaction'}
pa120_p	C27H51O8P1	-2	Metabolite	1,2-didodecanoyl-sn-glycerol 3-phosphate	{}	{}	p	{'MetabolicReaction'}
pa140_p	C31H59O8P1	-2	Metabolite	1,2-ditetradecanoyl-sn-glycerol 3-phosphate	{}	{}	p	{'MetabolicReaction'}
pa141_p	C31H55O8P1	-2	Metabolite	1,2-ditetradec-7-enoyl-sn-glycerol 3-phosphate	{}	{}	p	{'MetabolicReaction'}
pa160_p	C35H67O8P1	-2	Metabolite	1,2-dihexadecanoyl-sn-glycerol 3-phosphate	{}	{}	p	{'MetabolicReaction'}
pa161_p	C35H63O8P1	-2	Metabolite	1,2-dihexadec-9-enoyl-sn-glycerol 3-phosphate	{}	{}	p	{'MetabolicReaction'}
pa180_p	C39H75O8P1	-2	Metabolite	1,2-dioctadecanoyl-sn-glycerol 3-phosphate	{}	{}	p	{'MetabolicReaction'}
pa181_p	C39H71O8P1	-2	Metabolite	1,2-dioctadec-11-enoyl-sn-glycerol 3-phosphate	{}	{}	p	{'MetabolicReaction'}
pacald_p	C8H8O	0	Metabolite	Phenylacetaldehyde	{}	{}	p	{'MetabolicReaction'}
pe120_p	C29H58N1O8P1	0	Metabolite	phosphatidylethanolamine (didodecanoyl, n-C12:0)	{}	{}	p	{'MetabolicReaction'}
pe140_p	C33H66N1O8P1	0	Metabolite	phosphatidylethanolamine (ditetradecanoyl, n-C14:0)	{}	{}	p	{'MetabolicReaction'}
pe141_p	C33H62N1O8P1	0	Metabolite	phosphatidylethanolamine (ditetradec-7-enoyl, n-C14:1)	{}	{}	p	{'MetabolicReaction'}
pe160_p	C37H74N1O8P1	0	Metabolite	phosphatidylethanolamine (dihexadecanoyl, n-C16:0)	{}	{}	p	{'PostTranslationReaction', 'MetabolicReaction', 'SummaryVariable'}
pe161_p	C37H70N1O8P1	0	Metabolite	phosphatidylethanolamine (dihexadec-9enoyl, n-C16:1)	{}	{}	p	{'MetabolicReaction', 'SummaryVariable'}
pe180_p	C41H82N1O8P1	0	Metabolite	phosphatidylethanolamine (dioctadecanoyl, n-C18:0)	{}	{}	p	{'MetabolicReaction'}
pe181_p	C41H78N1O8P1	0	Metabolite	phosphatidylethanolamine (dioctadec-11-enoyl, n-C18:1)	{}	{}	p	{'MetabolicReaction'}
peamn_p	C8H12N	1	Metabolite	Phenethylamine	{}	{}	p	{'MetabolicReaction'}
pg120_p	C30H58O10P1	-1	Metabolite	Phosphatidylglycerol (didodecanoyl, n-C12:0)	{}	{}	p	{'PostTranslationReaction', 'MetabolicReaction'}
pg140_p	C34H66O10P1	-1	Metabolite	Phosphatidylglycerol (ditetradecanoyl, n-C14:0)	{}	{}	p	{'PostTranslationReaction', 'MetabolicReaction'}
pg141_p	C34H62O10P1	-1	Metabolite	Phosphatidylglycerol (ditetradec-7-enoyl, n-C14:1)	{}	{}	p	{'PostTranslationReaction', 'MetabolicReaction'}
pg160_p	C38H74O10P1	-1	Metabolite	Phosphatidylglycerol (dihexadecanoyl, n-C16:0)	{}	{}	p	{'PostTranslationReaction', 'MetabolicReaction'}
pg161_p	C38H70O10P1	-1	Metabolite	Phosphatidylglycerol (dihexadec-9-enoyl, n-C16:1)	{}	{}	p	{'PostTranslationReaction', 'MetabolicReaction'}
pg180_p	C42H82O10P1	-1	Metabolite	Phosphatidylglycerol (dioctadecanoyl, n-C18:0)	{}	{}	p	{'PostTranslationReaction', 'MetabolicReaction'}
pg181_p	C42H78O10P1	-1	Metabolite	Phosphatidylglycerol (dioctadec-11-enoyl, n-C18:1)	{}	{}	p	{'PostTranslationReaction', 'MetabolicReaction'}
pgp120_p	C30H57O13P2	-3	Metabolite	Phosphatidylglycerophosphate (didodecanoyl, n-C12:0)	{}	{}	p	{'MetabolicReaction'}
pgp140_p	C34H65O13P2	-3	Metabolite	Phosphatidylglycerophosphate (ditetradecanoyl, n-C14:0)	{}	{}	p	{'MetabolicReaction'}
pgp141_p	C34H61O13P2	-3	Metabolite	Phosphatidylglycerophosphate (ditetradec-7-enoyl, n-C14:1)	{}	{}	p	{'MetabolicReaction'}
pgp160_p	C38H73O13P2	-3	Metabolite	Phosphatidylglycerophosphate (dihexadecanoyl, n-C16:0)	{}	{}	p	{'MetabolicReaction'}
pgp161_p	C38H69O13P2	-3	Metabolite	Phosphatidylglycerophosphate (dihexadec-9-enoyl, n-C16:1)	{}	{}	p	{'MetabolicReaction'}
pgp180_p	C42H81O13P2	-3	Metabolite	Phosphatidylglycerophosphate (dioctadecanoyl, n-C18:0)	{}	{}	p	{'MetabolicReaction'}
pgp181_p	C42H77O13P2	-3	Metabolite	Phosphatidylglycerophosphate (dioctadec-11-enoyl, n-C18:1)	{}	{}	p	{'MetabolicReaction'}
phe__L_p	C9H11NO2	0	Metabolite	L-Phenylalanine	{}	{}	p	{'MetabolicReaction'}
pheme_p	C34H30FeN4O4	-2	Metabolite	Protoheme	{}	{}	p	{'MetabolicReaction'}
pi_p	HO4P	-2	Metabolite	Phosphate	{}	{}	p	{'MetabolicReaction'}
pnto__R_p	C9H16NO5	-1	Metabolite	(R)-Pantothenate	{}	{}	p	{'MetabolicReaction'}
ppa_p	C3H5O2	-1	Metabolite	Propionate (n-C3:0)	{}	{}	p	{'MetabolicReaction'}
ppal_p	C3H6O	0	Metabolite	Propanal	{}	{}	p	{'MetabolicReaction'}
pppn_p	C9H9O2	-1	Metabolite	Phenylpropanoate	{}	{}	p	{'MetabolicReaction'}
ppt_p	HO3P	-2	Metabolite	Phosphonate	{}	{}	p	{'MetabolicReaction'}
pro__L_p	C5H9NO2	0	Metabolite	L-Proline	{}	{}	p	{'MetabolicReaction'}
progly_p	C7H12N2O3	0	Metabolite	L-Prolinylglycine	{}	{}	p	{'MetabolicReaction'}
psclys_p	C12H25N2O7	1	Metabolite	psicoselysine	{}	{}	p	{'MetabolicReaction'}
pser__L_p	C3H6NO6P	-2	Metabolite	O-Phospho-L-serine	{}	{}	p	{'MetabolicReaction'}
ptrc_p	C4H14N2	2	Metabolite	Putrescine	{}	{}	p	{'MetabolicReaction'}
pydam_p	C8H13N2O2	1	Metabolite	Pyridoxamine	{}	{}	p	{'MetabolicReaction'}
pydx_p	C8H9NO3	0	Metabolite	Pyridoxal	{}	{}	p	{'MetabolicReaction'}
pydxn_p	C8H11NO3	0	Metabolite	Pyridoxine	{}	{}	p	{'MetabolicReaction'}
pyr_p	C3H3O3	-1	Metabolite	Pyruvate	{}	{}	p	{'MetabolicReaction'}
quin_p	C7H12O6	0	Metabolite	Quinate	{}	{}	p	{'MetabolicReaction'}
r5p_p	C5H9O8P	-2	Metabolite	alpha-D-Ribose 5-phosphate	{}	{}	p	{'MetabolicReaction'}
rfamp_p	C43H58N4O12	0	Metabolite	rifampin	{}	{}	p	{'MetabolicReaction'}
rib__D_p	C5H10O5	0	Metabolite	D-Ribose	{}	{}	p	{'MetabolicReaction'}
rmn_p	C6H12O5	0	Metabolite	L-Rhamnose	{}	{}	p	{'MetabolicReaction'}
sbt__D_p	C6H14O6	0	Metabolite	D-Sorbitol	{}	{}	p	{'MetabolicReaction'}
sel_p	O4Se	-2	Metabolite	Selenate	{}	{}	p	{'MetabolicReaction'}
ser__D_p	C3H7NO3	0	Metabolite	D-Serine	{}	{}	p	{'MetabolicReaction'}
ser__L_p	C3H7NO3	0	Metabolite	L-Serine	{}	{}	p	{'MetabolicReaction'}
skm_p	C7H9O5	-1	Metabolite	Shikimate	{}	{}	p	{'MetabolicReaction'}
slnt_p	O3Se	-2	Metabolite	selenite	{}	{}	p	{'MetabolicReaction'}
so2_p	O2S	0	Metabolite	sulfur dioxide	{}	{}	p	{'MetabolicReaction'}
so3_p	O3S	-2	Metabolite	Sulfite	{}	{}	p	{'MetabolicReaction'}
so4_p	O4S	-2	Metabolite	Sulfate	{}	{}	p	{'MetabolicReaction'}
spmd_p	C7H22N3	3	Metabolite	Spermidine	{}	{}	p	{'MetabolicReaction'}
succ_p	C4H4O4	-2	Metabolite	Succinate	{}	{}	p	{'MetabolicReaction'}
sucr_p	C12H22O11	0	Metabolite	Sucrose	{}	{}	p	{'MetabolicReaction'}
sulfac_p	C2H2O5S	-2	Metabolite	sulfoacetate	{}	{}	p	{'MetabolicReaction'}
tartr__D_p	C4H4O6	-2	Metabolite	D-tartrate	{}	{}	p	{'MetabolicReaction'}
tartr__L_p	C4H4O6	-2	Metabolite	L-tartrate	{}	{}	p	{'MetabolicReaction'}
taur_p	C2H7NO3S	0	Metabolite	Taurine	{}	{}	p	{'MetabolicReaction'}
tcynt_p	CNS	-1	Metabolite	Thiocyanate	{}	{}	p	{'MetabolicReaction'}
thm_p	C12H17N4OS	1	Metabolite	Thiamin	{}	{}	p	{'MetabolicReaction'}
thr__L_p	C4H9NO3	0	Metabolite	L-Threonine	{}	{}	p	{'MetabolicReaction'}
thrp_p	C4H8NO6P	-2	Metabolite	L-Threonine O-3-phosphate	{}	{}	p	{'MetabolicReaction'}
thym_p	C5H6N2O2	0	Metabolite	Thymine	{}	{}	p	{'MetabolicReaction'}
thymd_p	C10H14N2O5	0	Metabolite	Thymidine	{}	{}	p	{'MetabolicReaction'}
tma_p	C3H10N	1	Metabolite	trimethylamine	{}	{}	p	{'MetabolicReaction'}
tmao_p	C3H9NO	0	Metabolite	Trimethylamine N-oxide	{}	{}	p	{'MetabolicReaction'}
tre_p	C12H22O11	0	Metabolite	Trehalose	{}	{}	p	{'MetabolicReaction'}
trp__L_p	C11H12N2O2	0	Metabolite	L-Tryptophan	{}	{}	p	{'MetabolicReaction'}
tsul_p	O3S2	-2	Metabolite	Thiosulfate	{}	{}	p	{'MetabolicReaction'}
ttdca_p	C14H27O2	-1	Metabolite	tetradecanoate (n-C14:0)	{}	{}	p	{'MetabolicReaction'}
ttdcea_p	C14H25O2	-1	Metabolite	tetradecenoate (n-C14:1)	{}	{}	p	{'MetabolicReaction'}
ttrcyc_p	C22H24N2O8	0	Metabolite	tetracycline	{}	{}	p	{'MetabolicReaction'}
tungs_p	O4W1	-2	Metabolite	tungstate	{}	{}	p	{'MetabolicReaction'}
tym_p	C8H12NO	1	Metabolite	Tyramine	{}	{}	p	{'MetabolicReaction'}
tyr__L_p	C9H11NO3	0	Metabolite	L-Tyrosine	{}	{}	p	{'MetabolicReaction'}
tyrp_p	C9H10NO6P	-2	Metabolite	Phosphotyrosine	{}	{}	p	{'MetabolicReaction'}
uLa4n_p	C60H100N1O7P1	0	Metabolite	undecaprenyl phosphate-4-amino-4-deoxy-L-arabinose	{}	{}	p	{'MetabolicReaction'}
uacgam_p	C17H25N3O17P2	-2	Metabolite	UDP-N-acetyl-D-glucosamine	{}	{}	p	{'MetabolicReaction'}
udcpdp_p	C55H89O7P2	-3	Metabolite	Undecaprenyl diphosphate	{}	{}	p	{'MetabolicReaction'}
udcpp_p	C55H89O4P	-2	Metabolite	Undecaprenyl phosphate	{}	{}	p	{'MetabolicReaction'}
udpacgal_p	C17H25N3O17P2	-2	Metabolite	UDP-N-acetyl-D-galactosamine	{}	{}	p	{'MetabolicReaction'}
udpg_p	C15H22N2O17P2	-2	Metabolite	UDPglucose	{}	{}	p	{'MetabolicReaction'}
udpgal_p	C15H22N2O17P2	-2	Metabolite	UDPgalactose	{}	{}	p	{'MetabolicReaction'}
udpglcur_p	C15H19N2O18P2	-3	Metabolite	UDP-D-glucuronate	{}	{}	p	{'MetabolicReaction'}
ump_p	C9H11N2O9P	-2	Metabolite	UMP	{}	{}	p	{'MetabolicReaction'}
unagamuf_p	C79H126N3O22P2	-3	Metabolite	Undecaprenyl-diphospho N-acetylglucosamine-N-acetylmannosaminuronate-N-acetamido-4,6-dideoxy-D-galactose	{}	{}	p	{'MetabolicReaction'}
ura_p	C4H4N2O2	0	Metabolite	Uracil	{}	{}	p	{'MetabolicReaction'}
urea_p	CH4N2O	0	Metabolite	Urea	{}	{}	p	{'MetabolicReaction'}
uri_p	C9H12N2O6	0	Metabolite	Uridine	{}	{}	p	{'MetabolicReaction'}
val__L_p	C5H11NO2	0	Metabolite	L-Valine	{}	{}	p	{'MetabolicReaction'}
xan_p	C5H4N4O2	0	Metabolite	Xanthine	{}	{}	p	{'MetabolicReaction'}
xmp_p	C10H11N4O9P	-2	Metabolite	Xanthosine 5'-phosphate	{}	{}	p	{'MetabolicReaction'}
xtsn_p	C10H12N4O6	0	Metabolite	Xanthosine	{}	{}	p	{'MetabolicReaction'}
xyl__D_p	C5H10O5	0	Metabolite	D-Xylose	{}	{}	p	{'MetabolicReaction'}
xylu__L_p	C5H10O5	0	Metabolite	L-Xylulose	{}	{}	p	{'MetabolicReaction'}
zn2_p	Zn	2	Metabolite	Zinc	{}	{}	p	{'MetabolicReaction'}
cs_p	Cs	None	Metabolite	cesium ion	{}	{}	p	{'MetabolicReaction'}
cs_c	Cs	None	Metabolite	cesium ion	{}	{}	c	{'ComplexFormation', 'MetabolicReaction'}
3a1hac1p_c	C3H7NO5P	None	Metabolite	3-amino-1-hydroxyacetone-1-phosphate	{}	{}	c	{'MetabolicReaction'}
cs_e	Cs	None	Metabolite	cesium ion	{}	{}	e	{'MetabolicReaction', 'MEReaction'}
kdo2lipid4L_c	C96H170N2O38P2	None	Metabolite	KDO(2)-lipid IV(A) with laurate	{}	{}	c	{'MetabolicReaction'}
kdo2lipid4p_c	C100H176N2O38P2	None	Metabolite	KDO(2)-lipid IV(A) with palmitoleoyl	{}	{}	c	{'MetabolicReaction'}
23bpg_c	C3H3O10P2	None	Metabolite	2,3-bisphosphoglycerate	{}	{}	c	{'ComplexFormation', 'MetabolicReaction'}
hemed_c	C34H32N4O6Fe	None	Metabolite	heme D	{}	{}	c	{'ComplexFormation', 'MetabolicReaction'}
tl_c	Tl	None	Metabolite	thallium ion	{}	{}	c	{'ComplexFormation', 'MetabolicReaction', 'MEReaction'}
dpm_c	C20H20N2O8	None	Metabolite	dipyrromethane	{}	{}	c	{'ComplexFormation', 'MetabolicReaction'}
pqq_e	C14H3N2O8	None	Metabolite	pyrroloquinoline quinone	{}	{}	e	{'MetabolicReaction', 'MEReaction'}
pqq_c	C14H3N2O8	None	Metabolite	pyrroloquinoline quinone	{}	{}	c	{'ComplexFormation', 'MetabolicReaction'}
generic_tRNA_GAG_glu__L_c	None	None	Metabolite		{}	{}	c	{'tRNAChargingReaction', 'MetabolicReaction', 'TranslationReaction'}
2fe2s_c	Fe2S2	None	Metabolite		{}	{}	c	{'ComplexFormation', 'MetabolicReaction', 'MEReaction'}
4fe4s_c	Fe4S4	None	Metabolite		{}	{}	c	{'ComplexFormation', 'MEReaction'}
LI_c	Li	None	Metabolite		{}	{}	c	{'ComplexFormation', 'MEReaction'}
RNase_m5	None	None	Metabolite		{}	{}	c	{'ComplexFormation', 'MEReaction'}
RNase_m16	None	None	Metabolite		{}	{}	c	{'ComplexFormation', 'MEReaction'}
RNase_m23	None	None	Metabolite		{}	{}	c	{'ComplexFormation', 'MEReaction'}

## Sheet: RNAP
id	formula	charge	met_type	name	notes	annotation	compartment	reaction_involvement
RNAP54-CPLX	C19036H30704Mg2N5332O5899S126Zn	None	RNAP		{}	{}	c	{'TranscriptionReaction', 'ComplexFormation'}
CPLX0-222	C17871H28883Mg2N5039O5508S118Zn	None	RNAP		{}	{}	c	{'TranscriptionReaction', 'ComplexFormation'}
RNAP32-CPLX	C18094H29204Mg2N5097O5567S124Zn	None	RNAP		{}	{}	c	{'TranscriptionReaction', 'ComplexFormation'}
CPLX0-221	C17532H28319Mg2N4914O5393S120Zn	None	RNAP		{}	{}	c	{'TranscriptionReaction', 'ComplexFormation'}
RNAP70-CPLX	C19713H31813Mg2N5539O6126S141Zn	None	RNAP		{}	{}	c	{'TranscriptionReaction', 'ComplexFormation'}
RNAPS-CPLX	C18332H29619Mg2N5166O5657S118Zn	None	RNAP		{}	{}	c	{'TranscriptionReaction', 'ComplexFormation'}
RNAPE-CPLX	C17631H28484Mg2N4954O5424S118Zn	None	RNAP		{}	{}	c	{'TranscriptionReaction', 'ComplexFormation'}

## Sheet: Ribosome
id	formula	charge	met_type	name	notes	annotation	compartment	reaction_involvement
ribosome	C38487H64147Mg171N11545O11295P3S201	None	Ribosome		{}	{}	c	{'ComplexFormation', 'TranslationReaction'}

## Sheet: TranscribedGene
id	formula	charge	met_type	name	notes	annotation	compartment	reaction_involvement	left_pos	right_pos	strand	RNA_type	nucleotide_sequence
RNA_b0002	C23385H26540N9272O17191P2463	None	TranscribedGene		{}	{}	c	{'TranslationReaction', 'TranscriptionReaction', 'MEReaction'}	336	2799	+	mRNA	ATGCGAGTGTTGAAGTTCGGCGGTACATCAGTGGCAAATGCAGAACGTTTTCTGCGTGTTGCCGATATTCTGGAAAGCAATGCCAGGCAGGGGCAGGTGGCCACCGTCCTCTCTGCCCCCGCCAAAATCACCAACCACCTGGTGGCGATGATTGAAAAAACCATTAGCGGCCAGGATGCTTTACCCAATATCAGCGATGCCGAACGTATTTTTGCCGAACTTTTGACGGGACTCGCCGCCGCCCAGCCGGGGTTCCCGCTGGCGCAATTGAAAACTTTCGTCGATCAGGAATTTGCCCAAATAAAACATGTCCTGCATGGCATTAGTTTGTTGGGGCAGTGCCCGGATAGCATCAACGCTGCGCTGATTTGCCGTGGCGAGAAAATGTCGATCGCCATT…
[truncated: 1,678 more rows]

[truncated: 1 more sheets: TranslatedGene]
