# Supplementary figures and images for: COBRAme: A computational framework for genome-scale models of metabolism and gene expression
Source: PLOS journal article supplement (doi:10.1371/journal.pcbi.1006302), 2018-07-05

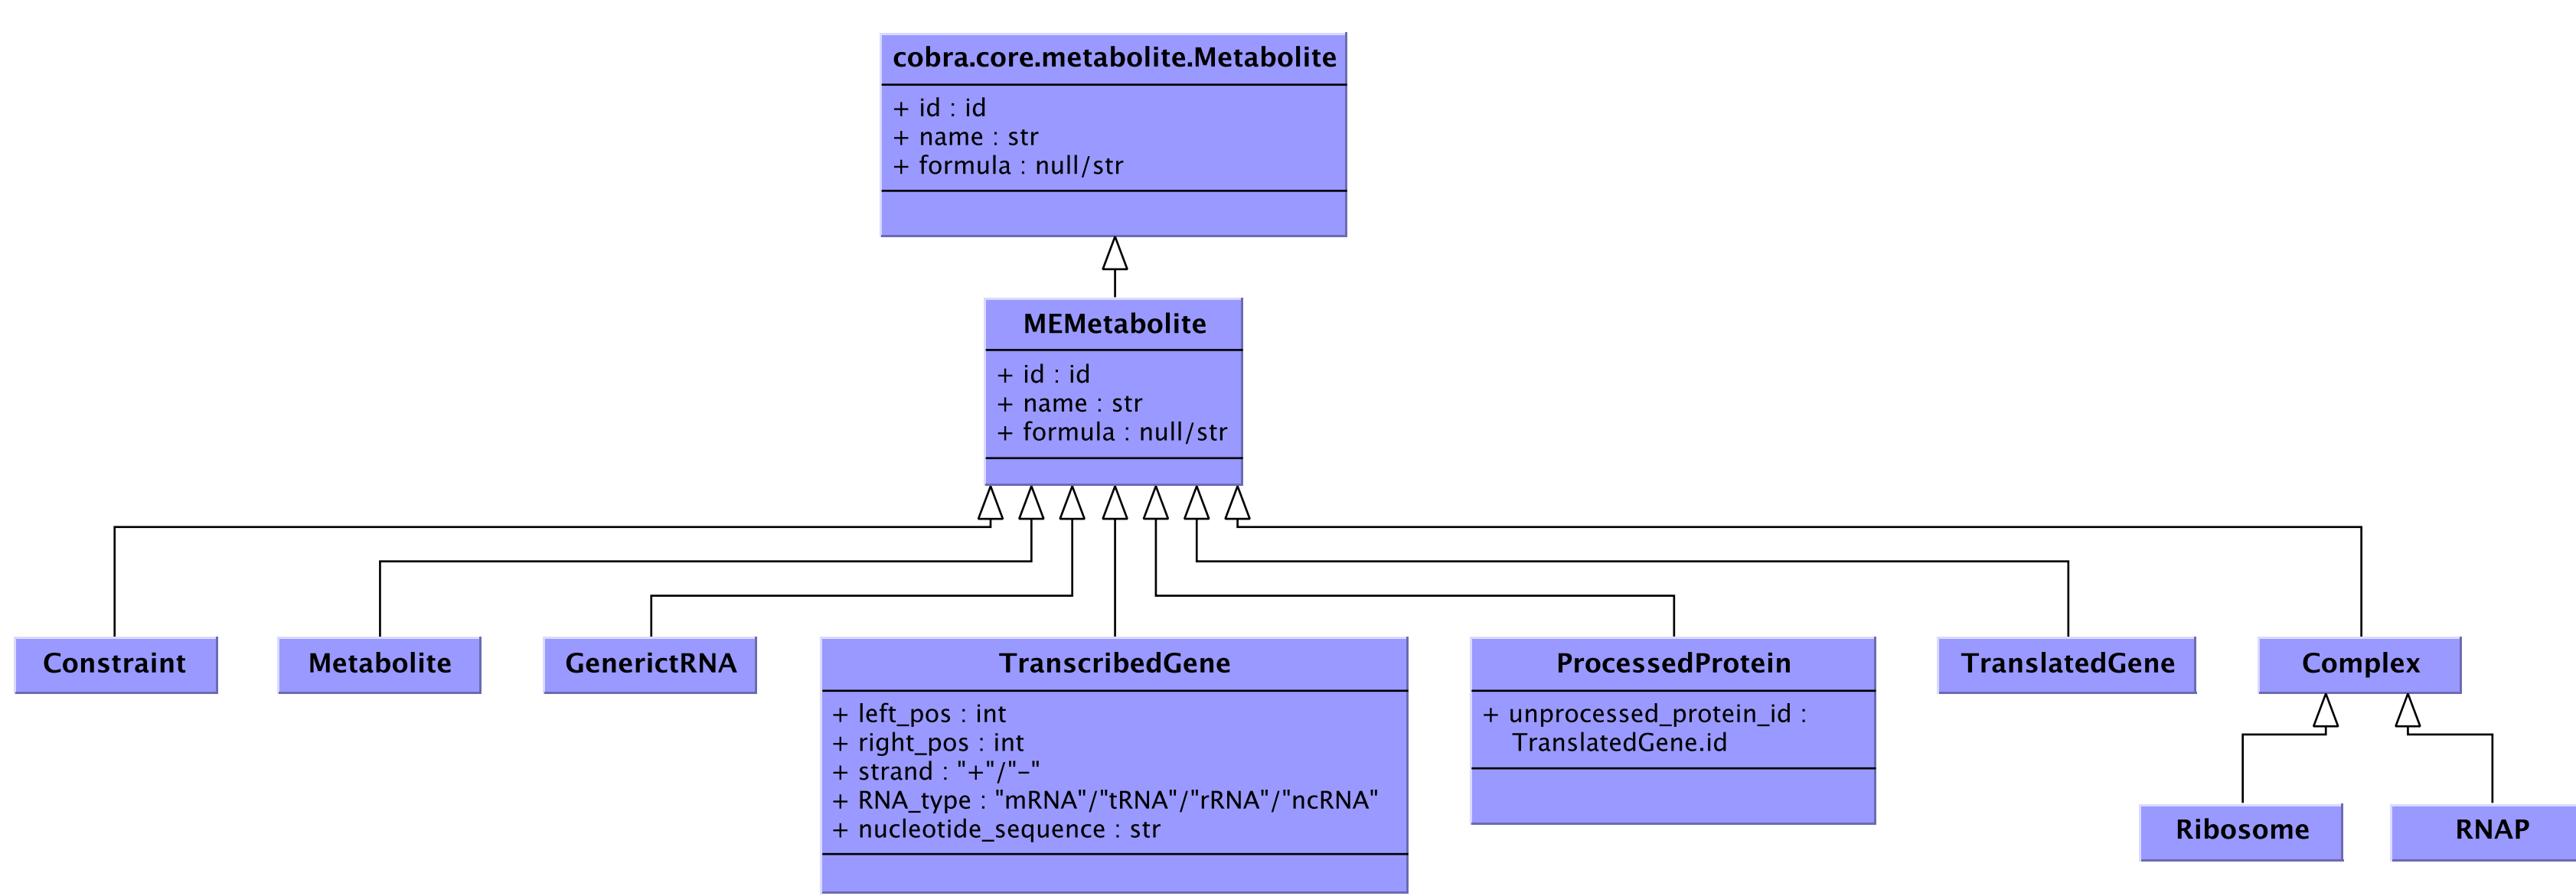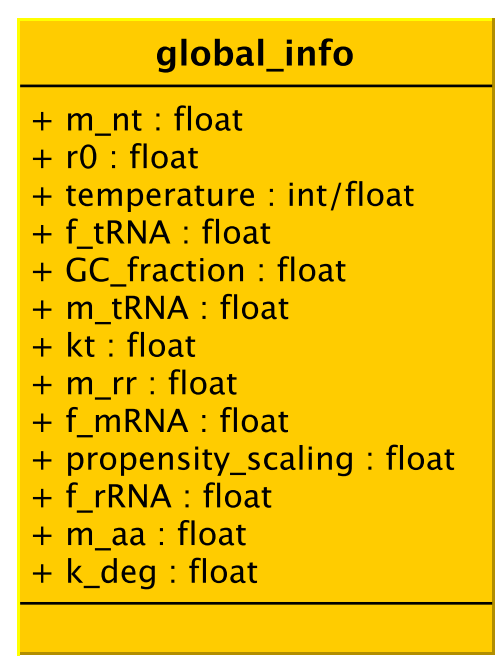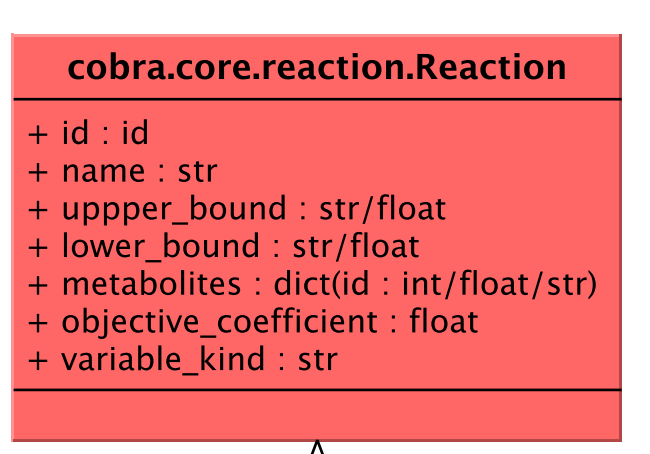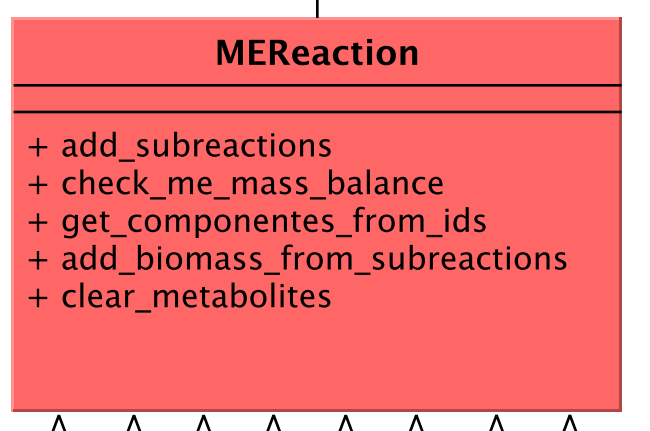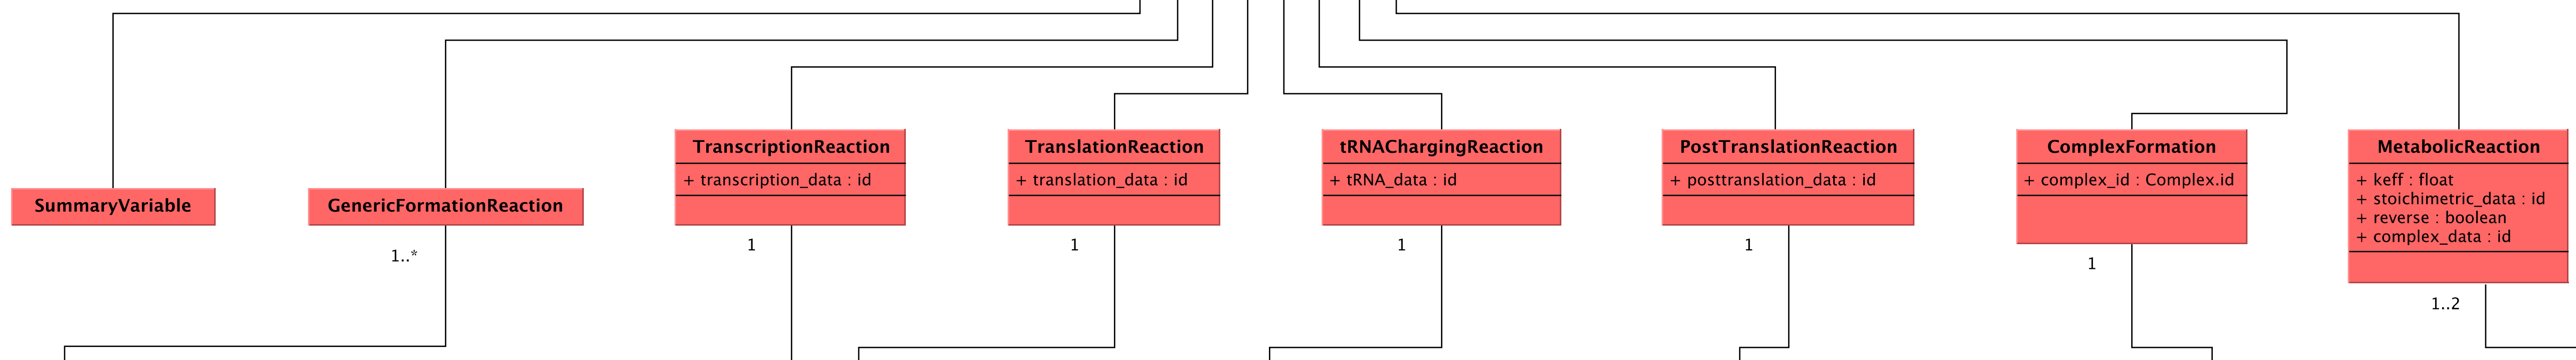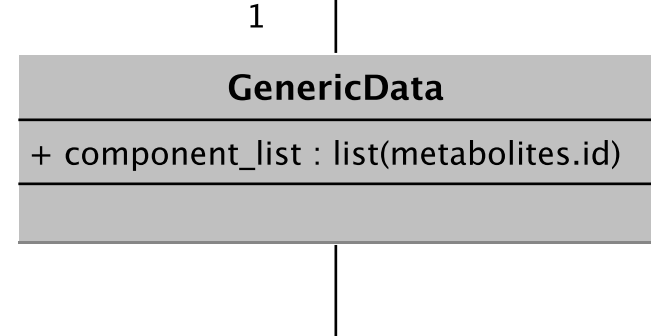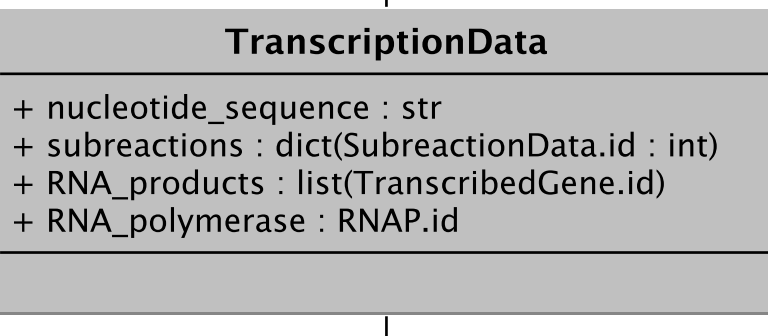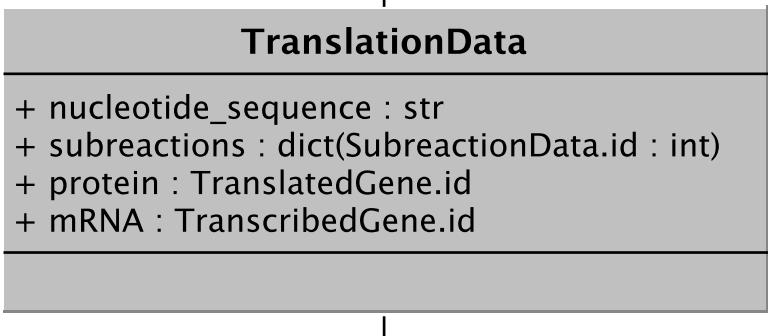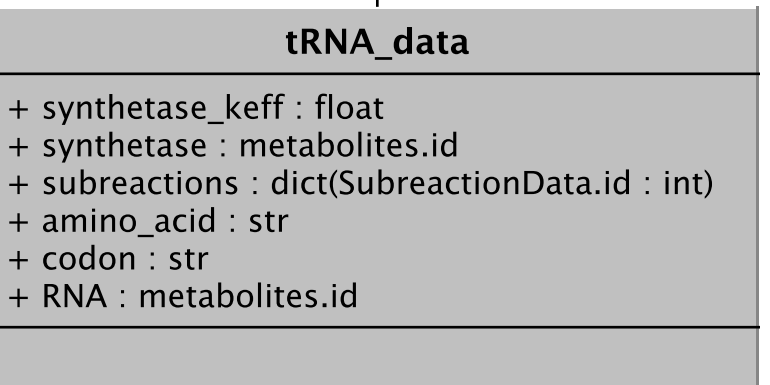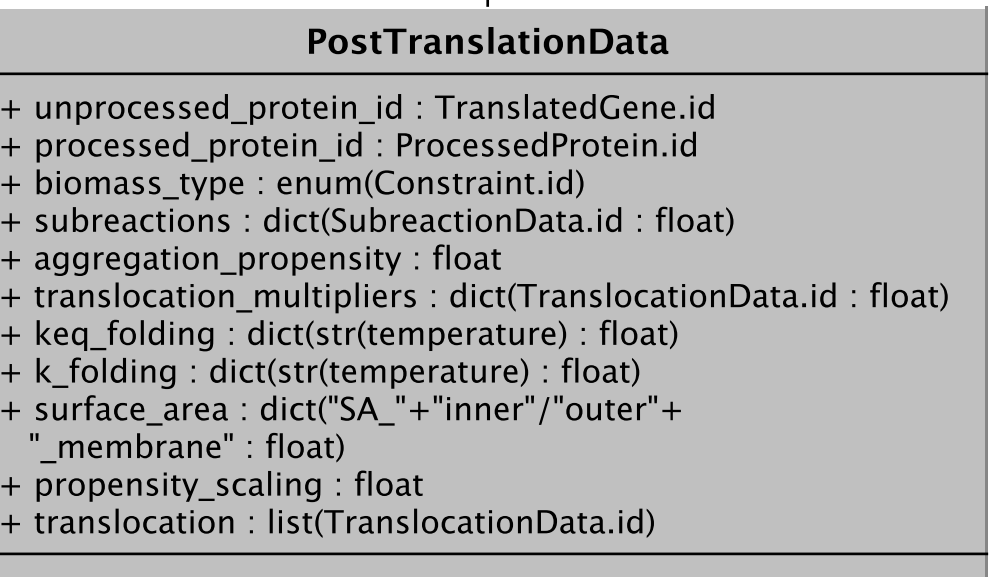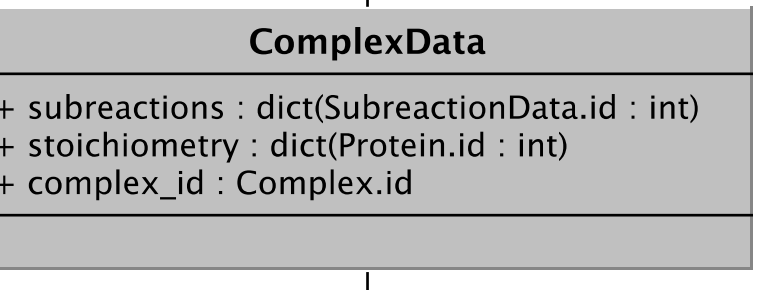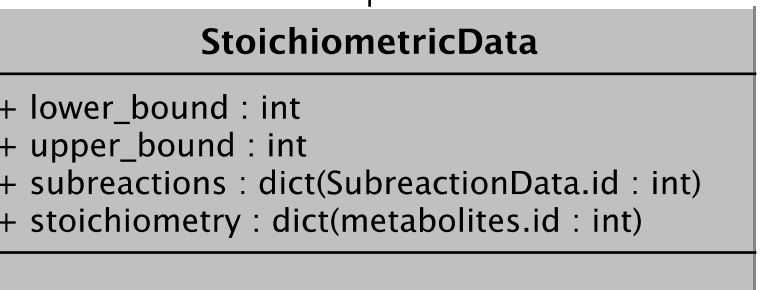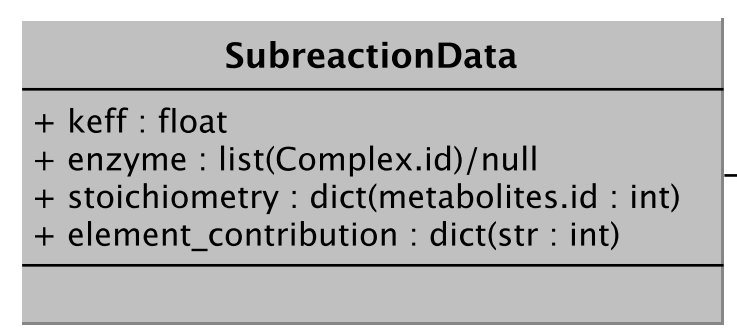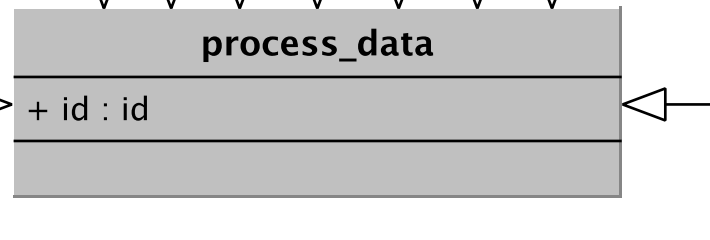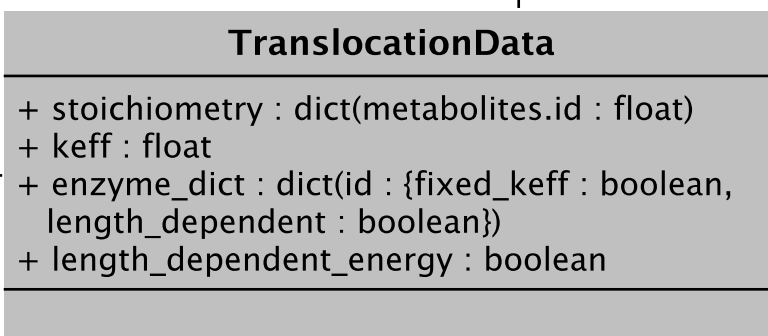

Supplement: S1 (10.1371/journal.pcbi.1006302.s001) [file journal.pcbi.1006302.s001]
